# Supplementary material for: Identification of Potential Biomarkers of Platelet RNA in Glioblastoma by Bioinformatics Analysis
Source: Hindawi journal article supplement (doi:10.1155/2022/2488139), 2022-01-01
Supplement: f1 [file 2488139.f1.pdf]

**Supplement Files: Table**

S1:GSE31095 glioma raw data

| Accession | SAMPLE TYPE    |
|-----------|----------------|
| GSM769920 | healty control |
| GSM769921 | healty control |
| GSM769922 | healty control |
| GSM769923 | healty control |
| GSM769924 | healty control |
| GSM769925 | healty control |
| GSM769926 | healty control |
| GSM769927 | healty control |
| GSM769928 | healty control |
| GSM769929 | healty control |
| GSM769930 | healty control |
| GSM769931 | healty control |
| GSM769932 | brain tumor    |
| GSM769933 | brain tumor    |
| GSM769934 | brain tumor    |
| GSM769935 | brain tumor    |
| GSM769936 | brain tumor    |
| GSM769937 | brain tumor    |
| GSM769938 | brain tumor    |
| GSM769939 | brain tumor    |
