# Supplementary material for: Identification of Potential Biomarkers of Platelet RNA in Glioblastoma by Bioinformatics Analysis
Source: Hindawi journal article supplement (doi:10.1155/2022/2488139), 2022-01-01
Supplement: f2 [file 2488139.f2.pdf]

**Supplement**  
**Files: Table**  
**S2:DEGs**

| Gene name | logFC    | PValue   | FDR      | regulated    |
|-----------|----------|----------|----------|--------------|
| GIMAP7    | 2.354652 | 2.38E-07 | 0.004688 | Up-Regulated |
| ADA       | 2.146243 | 2.12E-12 | 4.19E-08 | Up-Regulated |
| LCK       | 2.430346 | 3.02E-09 | 5.96E-05 | Up-Regulated |
| LTB       | 2.64917  | 5.58E-08 | 0.001101 | Up-Regulated |
| GZMA      | 2.75205  | 2.91E-08 | 0.000573 | Up-Regulated |
| GZMB      | 3.282743 | 3.94E-12 | 7.77E-08 | Up-Regulated |
| GZMH      | 2.841013 | 6.99E-07 | 0.013762 | Up-Regulated |
| ZAP70     | 2.312321 | 2.06E-06 | 0.04039  | Up-Regulated |
| LEF1      | 2.404212 | 3.95E-07 | 0.007786 | Up-Regulated |
| FAM102A   | 2.716688 | 3.62E-07 | 0.007119 | Up-Regulated |
| CX3CR1    | 2.90767  | 8.27E-09 | 0.000163 | Up-Regulated |
| NKG7      | 2.370286 | 1.35E-09 | 2.67E-05 | Up-Regulated |
| KLRB1     | 2.405777 | 6.50E-13 | 1.28E-08 | Up-Regulated |
| CDKN1C    | 2.493584 | 4.66E-14 | 9.20E-10 | Up-Regulated |
| IL2RB     | 2.221076 | 2.41E-07 | 0.004739 | Up-Regulated |
| RASAL3    | 2.366675 | 2.42E-06 | 0.047487 | Up-Regulated |
| RPL34     | 2.050126 | 6.84E-07 | 0.013461 | Up-Regulated |
| PLAC8     | 2.22022  | 1.05E-11 | 2.08E-07 | Up-Regulated |
| FGFBP2    | 2.013025 | 1.58E-06 | 0.031109 | Up-Regulated |
| CCL4      | 2.288887 | 7.48E-11 | 1.48E-06 | Up-Regulated |
| CD3D      | 2.215982 | 2.10E-06 | 0.041305 | Up-Regulated |
| CCR7      | 3.187991 | 1.88E-06 | 0.036879 | Up-Regulated |

|       |              |          |              |                |
|-------|--------------|----------|--------------|----------------|
| FDXR  | -<br>2.13517 | 1.17E-11 | 2.32E-<br>07 | Down-Regulated |
| LTF   | -<br>2.01418 | 4.21E-07 | 0.00829<br>4 | Down-Regulated |
| IL1R2 | -<br>3.96896 | 3.17E-10 | 6.25E-<br>06 | Down-Regulated |
| FKBP5 | -<br>2.72674 | 1.97E-17 | 3.90E-<br>13 | Down-Regulated |
| ACRC  | -<br>2.50518 | 7.47E-11 | 1.48E-<br>06 | Down-Regulated |
| DEFA4 | -<br>2.48737 | 3.52E-10 | 6.95E-<br>06 | Down-Regulated |
| DEFA3 | -4.0208      | 1.44E-09 | 2.83E-<br>05 | Down-Regulated |
| CAMP  | -2.1333      | 2.41E-07 | 0.00475<br>3 | Down-Regulated |
| CST7  | -3.7859      | 2.32E-07 | 0.00457<br>8 | Down-Regulated |
