# Supplementary material for: Identification of Potential Biomarkers of Platelet RNA in Glioblastoma by Bioinformatics Analysis
Source: Hindawi journal article supplement (doi:10.1155/2022/2488139), 2022-01-01
Supplement: f3 [file 2488139.f3.pdf]

**Supplement Files: Table S3:up-regulated mRNAs AND down-regulated mRNAs**

| N<br>u<br>m | Ge<br>ne<br>ID | Gen<br>e<br>nam<br>e | Official Full Name                                               | Loc<br>ati<br>on  |
|-------------|----------------|----------------------|------------------------------------------------------------------|-------------------|
| 1           | 16<br>85<br>37 | GIM<br>AP7           | GTPase, IMAP family<br>member 7                                  | 7q3<br>6.1        |
| 2           | 10<br>0        | ADA                  | adenosine deaminase                                              | 20q<br>13.<br>12  |
| 3           | 39<br>32       | LCK                  | LCK proto-oncogene, Src<br>family tyrosine kinase                | 1p3<br>5.2<br>6p2 |
| 4           | 40<br>50       | LTB                  | lymphotoxin beta                                                 | 1.3<br>3          |
| 5           | 30<br>01       | GZM<br>A             | granzyme A                                                       | 5q1<br>1.2        |
| 6           | 30<br>02       | GZM<br>B             | granzyme B                                                       | 14q<br>12         |
| 7           | 29<br>99       | GZM<br>H             | granzyme H                                                       | 14q<br>12         |
| 8           | 75<br>35       | ZAP<br>70            | zeta chain of T cell<br>receptor associated<br>protein kinase 70 | 2q1<br>1.2        |
| 9           | 51<br>17<br>6  | LEF<br>1             | lymphoid enhancer<br>binding factor 1                            | 4q2<br>5          |
| 10          | 39<br>96<br>65 | FAM<br>102<br>A      | family with sequence<br>similarity 102 member A                  | 9q3<br>4.1<br>1   |
| 11          | 15<br>24       | CX3<br>CR1           | C-X3-C motif chemokine<br>receptor 1                             | 3p2<br>2.2        |
| 12          | 48<br>18       | NKG<br>7             | natural killer cell<br>granule protein 7                         | 19q<br>13.<br>41  |
| 13          | 38<br>20       | KLR<br>B1            | killer cell lectin like<br>receptor B1                           | 12p<br>13.<br>31  |
| 14          | 10<br>28       | CDK<br>NIC           | cyclin dependent kinase<br>inhibitor 1C                          | 11p<br>15.<br>4   |
| 15          | 35<br>60       | IL2<br>RB            | interleukin 2 receptor<br>subunit beta                           | 22q<br>12.<br>3   |
| 16          | 64             | RAS                  | RAS protein activator                                            | 19p               |

|   |    |     |                          |     |
|---|----|-----|--------------------------|-----|
| 6 | 92 | AL3 | like 3                   | 13. |
|   | 6  |     |                          | 12  |
| 1 | 61 | RPL | ribosomal protein L34    | 4q2 |
| 7 | 64 | 34  |                          | 5   |
|   | 51 |     |                          | 4q2 |
| 1 | 31 | PLA | placenta associated 8    | 1.2 |
| 8 | 6  | C8  |                          | 2   |
|   | 83 |     |                          | 4p1 |
| 1 | 88 | FGF | fibroblast growth factor | 5.3 |
| 9 | 88 | BP2 | binding protein 2        | 2   |
|   | 8  |     |                          | 2   |
| 2 | 63 | CCL | C-C motif chemokine      | 17q |
| 0 | 51 | 4   | ligand 4                 | 12  |
|   |    |     |                          | 11q |
| 2 | 91 | CD3 | CD3d molecule            | 23. |
| 1 | 5  | D   |                          | 3   |
|   |    |     |                          | 17q |
| 2 | 12 | CCR | C-C motif chemokine      | 21. |
| 2 | 36 | 7   | receptor 7               | 2   |
|   |    |     |                          | 17q |
| 2 | 22 | FDX | ferredoxin reductase     | 25. |
| 3 | 32 | R   |                          | 1   |
|   |    |     |                          | 3p2 |
| 2 | 40 | LTF | lactotransferrin         | 1.3 |
| 4 | 57 |     |                          | 1   |
|   |    |     |                          | 2q1 |
| 2 | 78 | IL1 | interleukin 1 receptor   | 1.2 |
| 5 | 50 | R2  | type 2                   | 6p2 |
|   |    |     |                          | 1.3 |
| 2 | 22 | FKB | FKBP prolyl isomerase 5  | 1   |
| 6 | 89 | P5  |                          | 1   |
|   | 93 |     |                          | Xq1 |
| 2 | 95 | ACR | Acidic repeat-containing | 3.1 |
| 7 | 3  | C   | protein                  |     |
|   |    |     |                          | 8p2 |
| 2 | 16 | DEF | defensin alpha 4         | 3.1 |
| 8 | 69 | A4  |                          | 8p2 |
|   |    |     |                          | 3.1 |
| 2 | 16 | DEF | defensin alpha 3         | 3p2 |
| 9 | 68 | A3  |                          | 1.3 |
|   |    |     |                          | 1   |
| 3 | 82 | CAM | cathelicidin             | 20p |
| 0 | 0  | P   | antimicrobial peptide    | 11. |
|   |    |     |                          | 21  |
|   |    |     |                          | 20p |
| 3 | 85 | CST | cystatin F               | 11. |
| 1 | 30 | 7   |                          | 21  |
