# Supplementary material for: Identification of Potential Biomarkers of Platelet RNA in Glioblastoma by Bioinformatics Analysis
Source: Hindawi journal article supplement (doi:10.1155/2022/2488139), 2022-01-01
Supplement: f4 [file 2488139.f4.pdf]

**Supplement Files: Table S4:** The overlapped targets (has-circ-0015164, hsa-circ-0003243)

| mir RN A     | circB ase prediction | circB ase prediction | circB ank prediction | circB ank prediction |
|--------------|----------------------|----------------------|----------------------|----------------------|
| hsa-miR-1-3p | hsa_circ_009298      | hsa-let-7a-5p        | hsa-miR-1-3p         | hsa-let-7a-5p        |
|              | hsa_circ_009298      | hsa_circ_00828       | hsa_circ_043225      | hsa_circ_100108      |
|              | hsa_circ_009299      | hsa_circ_007211      | hsa_circ_006952      | hsa_circ_084831      |
|              | hsa_circ_009321      | hsa_circ_009180      | hsa_circ_120449      | hsa_circ_008534      |
|              | hsa_circ_009487      | hsa_circ_009181      | hsa_circ_056854      | hsa_circ_015491      |
|              | hsa_circ_009488      | hsa_circ_009255      | hsa_circ_000182      | hsa_circ_035477      |
|              | hsa_circ_009489      | hsa_circ_009301      | hsa_circ_001314      | hsa_circ_040524      |
|              | hsa_circ_009723      | hsa_circ_009300      | hsa_circ_001359      | hsa_circ_058229      |
|              | hsa_circ_009724      | hsa_circ_02136       | hsa_circ_003243      | hsa_circ_069396      |
|              | hsa_circ_009725      | hsa_circ_01621       | hsa_circ_016411      | hsa_circ_079284      |
|              | hsa_circ_009727      | hsa_circ_009316      | hsa_circ_016458      | hsa_circ_095454      |
|              | hsa_circ_009727      | hsa_circ_009316      | hsa_circ_016458      | hsa_circ_095454      |

|       |       |       |       |
|-------|-------|-------|-------|
| 0097  | 0093  | 01724 | 09913 |
| 30    | 18    | 4     | 2     |
| hsa_c | hsa_c | hsa_c | hsa_c |
| irc_0 | irc_0 | irc_0 | irc_0 |
| 0097  | 0093  | 01724 | 11057 |
| 31    | 15    | 8     | 2     |
| hsa_c | hsa_c | hsa_c | hsa_c |
| irc_0 | irc_0 | irc_0 | irc_0 |
| 0097  | 0094  | 01792 | 12202 |
| 33    | 20    | 4     | 7     |
| hsa_c | hsa_c | hsa_c | hsa_c |
| irc_0 | irc_0 | irc_0 | irc_0 |
| 0097  | 0094  | 01827 | 12551 |
| 34    | 19    | 4     | 3     |
| hsa_c | hsa_c | hsa_c | hsa_c |
| irc_0 | irc_0 | irc_0 | irc_0 |
| 0097  | 0094  | 02998 | 12618 |
| 35    | 87    | 5     | 7     |
| hsa_c | hsa_c | hsa_c | hsa_c |
| irc_0 | irc_0 | irc_0 | irc_0 |
| 0097  | 0094  | 03215 | 13062 |
| 36    | 88    | 7     | 3     |
| hsa_c | hsa_c | hsa_c | hsa_c |
| irc_0 | irc_0 | irc_0 | irc_0 |
| 0024  | 0094  | 03543 | 12618 |
| 37    | 89    | 1     | 6     |
| hsa_c | hsa_c | hsa_c | hsa_c |
| irc_0 | irc_0 | irc_0 | irc_0 |
| 0044  | 0095  | 03701 | 10010 |
| 93    | 51    | 0     | 6     |
| hsa_c | hsa_c | hsa_c | hsa_c |
| irc_0 | irc_0 | irc_0 | irc_0 |
| 0055  | 0079  | 03715 | 10010 |
| 53    | 62    | 7     | 5     |
| hsa_c | hsa_c | hsa_c | hsa_c |
| irc_0 | irc_0 | irc_0 | irc_0 |
| 0104  | 0096  | 03715 | 07780 |
| 39    | 84    | 8     | 6     |
| hsa_c | hsa_c | hsa_c | hsa_c |
| irc_0 | irc_0 | irc_0 | irc_0 |
| 0104  | 0096  | 03795 | 00765 |
| 42    | 87    | 3     | 2     |
| hsa_c | hsa_c | hsa_c | hsa_c |
| irc_0 | irc_0 | irc_0 | irc_0 |
| 0104  | 0096  | 03795 | 00703 |
| 43    | 89    | 6     | 5     |
| hsa_c | hsa_c | hsa_c | hsa_c |
| irc_0 | irc_0 | irc_0 | irc_0 |
| 0104  | 0096  | 04489 | 04788 |
| 44    | 90    | 6     | 5     |
| hsa_c | hsa_c | hsa_c | hsa_c |
| irc_0 | irc_0 | irc_0 | irc_0 |
| 0080  | 0099  | 04827 | 00100 |
| 9     | 44    | 9     | 9     |

|       |       |       |       |
|-------|-------|-------|-------|
| hsa_c | hsa_c | hsa_c | hsa_c |
| irc_0 | irc_0 | irc_0 | irc_0 |
| 0122  | 0099  | 05470 | 00137 |
| 8     | 45    | 2     | 7     |
| hsa_c | hsa_c | hsa_c | hsa_c |
| irc_0 | irc_0 | irc_0 | irc_0 |
| 0104  | 0099  | 05584 | 00223 |
| 50    | 46    | 9     | 3     |
| hsa_c | hsa_c | hsa_c | hsa_c |
| irc_0 | irc_0 | irc_0 | irc_0 |
| 0104  | 0099  | 06518 | 00238 |
| 51    | 48    | 2     | 3     |
| hsa_c | hsa_c | hsa_c | hsa_c |
| irc_0 | irc_0 | irc_0 | irc_0 |
| 0104  | 0099  | 07033 | 00298 |
| 52    | 49    | 0     | 4     |
| hsa_c | hsa_c | hsa_c | hsa_c |
| irc_0 | irc_0 | irc_0 | irc_0 |
| 0104  | 0099  | 07042 | 00324 |
| 53    | 52    | 9     | 3     |
| hsa_c | hsa_c | hsa_c | hsa_c |
| irc_0 | irc_0 | irc_0 | irc_0 |
| 0107  | 0099  | 07311 | 00631 |
| 85    | 53    | 1     | 5     |
| hsa_c | hsa_c | hsa_c | hsa_c |
| irc_0 | irc_0 | irc_0 | irc_0 |
| 0107  | 0099  | 07311 | 00655 |
| 86    | 57    | 4     | 2     |
| hsa_c | hsa_c | hsa_c | hsa_c |
| irc_0 | irc_0 | irc_0 | irc_0 |
| 0107  | 0099  | 07622 | 00776 |
| 87    | 58    | 0     | 7     |
| hsa_c | hsa_c | hsa_c | hsa_c |
| irc_0 | irc_0 | irc_0 | irc_0 |
| 0107  | 0099  | 08123 | 01262 |
| 89    | 59    | 3     | 8     |
| hsa_c | hsa_c | hsa_c | hsa_c |
| irc_0 | irc_0 | irc_0 | irc_0 |
| 0107  | 0099  | 08508 | 01279 |
| 92    | 60    | 1     | 2     |
| hsa_c | hsa_c | hsa_c | hsa_c |
| irc_0 | irc_0 | irc_0 | irc_0 |
| 0107  | 0099  | 09824 | 01375 |
| 91    | 61    | 6     | 1     |
| hsa_c | hsa_c | hsa_c | hsa_c |
| irc_0 | irc_0 | irc_0 | irc_0 |
| 0109  | 0099  | 10339 | 01376 |
| 04    | 62    | 1     | 1     |
| hsa_c | hsa_c | hsa_c | hsa_c |
| irc_0 | irc_0 | irc_0 | irc_0 |
| 0109  | 0028  | 10494 | 01526 |
| 15    | 98    | 4     | 2     |
| hsa_c | hsa_c | hsa_c | hsa_c |
| irc_0 | irc_0 | irc_0 | irc_0 |
| 0109  | 0091  | 10504 | 01798 |

|       |       |       |       |
|-------|-------|-------|-------|
| 17    | 18    | 2     | 3     |
| hsa_c | hsa_c | hsa_c | hsa_c |
| irc_0 | irc_0 | irc_0 | irc_0 |
| 0109  | 0100  | 10720 | 01828 |
| 18    | 40    | 3     | 0     |
| hsa_c | hsa_c | hsa_c | hsa_c |
| irc_0 | irc_0 | irc_0 | irc_0 |
| 0109  | 0100  | 11167 | 02008 |
| 19    | 41    | 4     | 3     |
| hsa_c | hsa_c | hsa_c | hsa_c |
| irc_0 | irc_0 | irc_0 | irc_0 |
| 0109  | 0100  | 11167 | 02091 |
| 21    | 42    | 5     | 9     |
| hsa_c | hsa_c | hsa_c | hsa_c |
| irc_0 | irc_0 | irc_0 | irc_0 |
| 0109  | 0100  | 11181 | 02202 |
| 22    | 43    | 7     | 3     |
| hsa_c | hsa_c | hsa_c | hsa_c |
| irc_0 | irc_0 | irc_0 | irc_0 |
| 0109  | 0100  | 11190 | 02484 |
| 83    | 44    | 6     | 2     |
| hsa_c | hsa_c | hsa_c | hsa_c |
| irc_0 | irc_0 | irc_0 | irc_0 |
| 0109  | 0100  | 11277 | 02484 |
| 84    | 45    | 4     | 3     |
| hsa_c | hsa_c | hsa_c | hsa_c |
| irc_0 | irc_0 | irc_0 | irc_0 |
| 0109  | 0054  | 11277 | 02725 |
| 85    | 1     | 7     | 1     |
| hsa_c | hsa_c | hsa_c | hsa_c |
| irc_0 | irc_0 | irc_0 | irc_0 |
| 0110  | 0101  | 11277 | 02831 |
| 13    | 19    | 9     | 2     |
| hsa_c | hsa_c | hsa_c | hsa_c |
| irc_0 | irc_0 | irc_0 | irc_0 |
| 0110  | 0101  | 11278 | 02945 |
| 18    | 20    | 0     | 7     |
| hsa_c | hsa_c | hsa_c | hsa_c |
| irc_0 | irc_0 | irc_0 | irc_0 |
| 0110  | 0101  | 11278 | 02945 |
| 19    | 23    | 1     | 8     |
| hsa_c | hsa_c | hsa_c | hsa_c |
| irc_0 | irc_0 | irc_0 | irc_0 |
| 0110  | 0101  | 11426 | 03054 |
| 64    | 25    | 0     | 3     |
| hsa_c | hsa_c | hsa_c | hsa_c |
| irc_0 | irc_0 | irc_0 | irc_0 |
| 0110  | 0101  | 11496 | 03054 |
| 65    | 27    | 6     | 7     |
| hsa_c | hsa_c | hsa_c | hsa_c |
| irc_0 | irc_0 | irc_0 | irc_0 |
| 0110  | 0101  | 11651 | 03242 |
| 66    | 28    | 8     | 0     |
| hsa_c | hsa_c | hsa_c | hsa_c |

|       |       |       |       |
|-------|-------|-------|-------|
| irc_0 | irc_0 | irc_0 | irc_0 |
| 0110  | 0101  | 11694 | 03540 |
| 67    | 29    | 3     | 3     |
| hsa_c | hsa_c | hsa_c | hsa_c |
| irc_0 | irc_0 | irc_0 | irc_0 |
| 0110  | 0052  | 11695 | 03807 |
| 68    | 40    | 9     | 4     |
| hsa_c | hsa_c | hsa_c | hsa_c |
| irc_0 | irc_0 | irc_0 | irc_0 |
| 0110  | 0086  | 12054 | 03869 |
| 69    | 11    | 0     | 6     |
| hsa_c | hsa_c | hsa_c | hsa_c |
| irc_0 | irc_0 | irc_0 | irc_0 |
| 0110  | 0081  | 12429 | 03901 |
| 70    | 09    | 5     | 2     |
| hsa_c | hsa_c | hsa_c | hsa_c |
| irc_0 | irc_0 | irc_0 | irc_0 |
| 0110  | 0066  | 12645 | 04013 |
| 71    | 43    | 2     | 2     |
| hsa_c | hsa_c | hsa_c | hsa_c |
| irc_0 | irc_0 | irc_0 | irc_0 |
| 0111  | 0047  | 12782 | 04209 |
| 78    | 84    | 0     | 8     |
| hsa_c | hsa_c | hsa_c | hsa_c |
| irc_0 | irc_0 | irc_0 | irc_0 |
| 0113  | 0041  | 12850 | 04754 |
| 31    | 77    | 5     | 5     |
| hsa_c | hsa_c | hsa_c | hsa_c |
| irc_0 | irc_0 | irc_0 | irc_0 |
| 0113  | 0029  | 12890 | 05057 |
| 32    | 78    | 4     | 0     |
| hsa_c | hsa_c | hsa_c | hsa_c |
| irc_0 | irc_0 | irc_0 | irc_0 |
| 0113  | 0087  | 12891 | 05467 |
| 33    | 33    | 0     | 4     |
| hsa_c | hsa_c | hsa_c | hsa_c |
| irc_0 | irc_0 | irc_0 | irc_0 |
| 0113  | 0101  | 12969 | 05540 |
| 34    | 70    | 9     | 2     |
| hsa_c | hsa_c | hsa_c | hsa_c |
| irc_0 | irc_0 | irc_0 | irc_0 |
| 0063  | 0101  | 13249 | 05994 |
| 49    | 71    | 2     | 5     |
| hsa_c | hsa_c | hsa_c | hsa_c |
| irc_0 | irc_0 | irc_0 | irc_0 |
| 0113  | 0101  | 13284 | 06347 |
| 44    | 72    | 3     | 5     |
| hsa_c | hsa_c | hsa_c | hsa_c |
| irc_0 | irc_0 | irc_0 | irc_0 |
| 0114  | 0102  | 13334 | 06397 |
| 16    | 46    | 8     | 2     |
| hsa_c | hsa_c | hsa_c | hsa_c |
| irc_0 | irc_0 | irc_0 | irc_0 |
| 0114  | 0102  | 13416 | 06530 |
| 17    | 50    | 1     | 5     |

|       |       |       |       |
|-------|-------|-------|-------|
| hsa_c | hsa_c | hsa_c | hsa_c |
| irc_0 | irc_0 | irc_0 | irc_0 |
| 0114  | 0102  | 13416 | 06555 |
| 49    | 51    | 3     | 2     |
| hsa_c | hsa_c | hsa_c | hsa_c |
| irc_0 | irc_0 | irc_0 | irc_0 |
| 0114  | 0102  | 13764 | 06614 |
| 53    | 52    | 6     | 8     |
| hsa_c | hsa_c | hsa_c | hsa_c |
| irc_0 | irc_0 | irc_0 | irc_0 |
| 0115  | 0102  | 13608 | 06685 |
| 83    | 53    | 4     | 6     |
| hsa_c | hsa_c | hsa_c | hsa_c |
| irc_0 | irc_0 | irc_0 | irc_0 |
| 0116  | 0102  | 13262 | 06924 |
| 17    | 54    | 7     | 3     |
| hsa_c | hsa_c | hsa_c | hsa_c |
| irc_0 | irc_0 | irc_0 | irc_0 |
| 0116  | 0102  | 12277 | 06944 |
| 23    | 55    | 9     | 3     |
| hsa_c | hsa_c | hsa_c | hsa_c |
| irc_0 | irc_0 | irc_0 | irc_0 |
| 0116  | 0102  | 11844 | 07102 |
| 61    | 56    | 1     | 1     |
| hsa_c | hsa_c | hsa_c | hsa_c |
| irc_0 | irc_0 | irc_0 | irc_0 |
| 0116  | 0102  | 11458 | 07102 |
| 62    | 58    | 8     | 3     |
| hsa_c | hsa_c | hsa_c | hsa_c |
| irc_0 | irc_0 | irc_0 | irc_0 |
| 0116  | 0102  | 10668 | 07116 |
| 63    | 45    | 9     | 0     |
| hsa_c | hsa_c | hsa_c | hsa_c |
| irc_0 | irc_0 | irc_0 | irc_0 |
| 0116  | 0103  | 10467 | 07136 |
| 64    | 99    | 2     | 5     |
| hsa_c | hsa_c | hsa_c | hsa_c |
| irc_0 | irc_0 | irc_0 | irc_0 |
| 0116  | 0104  | 09740 | 07181 |
| 71    | 03    | 1     | 8     |
| hsa_c | hsa_c | hsa_c | hsa_c |
| irc_0 | irc_0 | irc_0 | irc_0 |
| 0116  | 0104  | 07670 | 08815 |
| 87    | 02    | 4     | 3     |
| hsa_c | hsa_c | hsa_c | hsa_c |
| irc_0 | irc_0 | irc_0 | irc_0 |
| 0117  | 0105  | 06933 | 09061 |
| 44    | 53    | 7     | 4     |
| hsa_c | hsa_c | hsa_c | hsa_c |
| irc_0 | irc_0 | irc_0 | irc_0 |
| 0117  | 0105  | 06791 | 09255 |
| 45    | 59    | 3     | 6     |
| hsa_c | hsa_c | hsa_c | hsa_c |
| irc_0 | irc_0 | irc_0 | irc_0 |
| 0117  | 0105  | 06790 | 09431 |

|       |       |       |       |
|-------|-------|-------|-------|
| 46    | 60    | 9     | 6     |
| hsa_c | hsa_c | hsa_c | hsa_c |
| irc_0 | irc_0 | irc_0 | irc_0 |
| 0117  | 0105  | 06460 | 09496 |
| 48    | 70    | 4     | 4     |
| hsa_c | hsa_c | hsa_c | hsa_c |
| irc_0 | irc_0 | irc_0 | irc_0 |
| 0117  | 0105  | 06305 | 09579 |
| 49    | 73    | 9     | 0     |
| hsa_c | hsa_c | hsa_c | hsa_c |
| irc_0 | irc_0 | irc_0 | irc_0 |
| 0119  | 0105  | 05703 | 09579 |
| 52    | 74    | 4     | 1     |
| hsa_c | hsa_c | hsa_c | hsa_c |
| irc_0 | irc_0 | irc_0 | irc_0 |
| 0120  | 0105  | 04489 | 09818 |
| 16    | 51    | 8     | 0     |
| hsa_c | hsa_c | hsa_c | hsa_c |
| irc_0 | irc_0 | irc_0 | irc_0 |
| 0120  | 0052  | 04242 | 09904 |
| 17    | 47    | 1     | 5     |
| hsa_c | hsa_c | hsa_c | hsa_c |
| irc_0 | irc_0 | irc_0 | irc_0 |
| 0120  | 0108  | 03935 | 09912 |
| 20    | 69    | 9     | 8     |
| hsa_c | hsa_c | hsa_c | hsa_c |
| irc_0 | irc_0 | irc_0 | irc_0 |
| 0120  | 0004  | 03935 | 09920 |
| 21    | 0     | 7     | 1     |
| hsa_c | hsa_c | hsa_c | hsa_c |
| irc_0 | irc_0 | irc_0 | irc_0 |
| 0120  | 0108  | 02570 | 09975 |
| 93    | 88    | 8     | 5     |
| hsa_c | hsa_c | hsa_c | hsa_c |
| irc_0 | irc_0 | irc_0 | irc_0 |
| 0122  | 0035  | 01724 | 10244 |
| 23    | 53    | 6     | 5     |
| hsa_c | hsa_c | hsa_c | hsa_c |
| irc_0 | irc_0 | irc_0 | irc_0 |
| 0122  | 0109  | 01516 | 10446 |
| 81    | 48    | 4     | 5     |
| hsa_c | hsa_c | hsa_c | hsa_c |
| irc_0 | irc_0 | irc_0 | irc_0 |
| 0122  | 0109  | 01444 | 10528 |
| 85    | 54    | 6     | 7     |
| hsa_c | hsa_c | hsa_c | hsa_c |
| irc_0 | irc_0 | irc_0 | irc_0 |
| 0122  | 0109  | 00747 | 10766 |
| 90    | 57    | 8     | 5     |
| hsa_c | hsa_c | hsa_c | hsa_c |
| irc_0 | irc_0 | irc_0 | irc_0 |
| 0122  | 0109  | 00522 | 10771 |
| 91    | 60    | 8     | 0     |
| hsa_c | hsa_c | hsa_c | hsa_c |

|       |       |       |       |
|-------|-------|-------|-------|
| irc_0 | irc_0 | irc_0 | irc_0 |
| 0122  | 0110  | 00136 | 11439 |
| 92    | 23    | 0     | 9     |
| hsa_c | hsa_c |       | hsa_c |
| irc_0 | irc_0 |       | irc_0 |
| 0124  | 0110  |       | 11498 |
| 67    | 24    |       | 3     |
| hsa_c | hsa_c |       | hsa_c |
| irc_0 | irc_0 |       | irc_0 |
| 0124  | 0072  |       | 11583 |
| 90    | 83    |       | 7     |
| hsa_c | hsa_c |       | hsa_c |
| irc_0 | irc_0 |       | irc_0 |
| 0124  | 0110  |       | 11660 |
| 91    | 48    |       | 3     |
| hsa_c | hsa_c |       | hsa_c |
| irc_0 | irc_0 |       | irc_0 |
| 0124  | 0111  |       | 11745 |
| 96    | 09    |       | 1     |
| hsa_c | hsa_c |       | hsa_c |
| irc_0 | irc_0 |       | irc_0 |
| 0124  | 0111  |       | 11779 |
| 97    | 10    |       | 2     |
| hsa_c | hsa_c |       | hsa_c |
| irc_0 | irc_0 |       | irc_0 |
| 0124  | 0080  |       | 12343 |
| 98    | 57    |       | 1     |
| hsa_c | hsa_c |       | hsa_c |
| irc_0 | irc_0 |       | irc_0 |
| 0124  | 0111  |       | 12344 |
| 99    | 11    |       | 1     |
| hsa_c | hsa_c |       | hsa_c |
| irc_0 | irc_0 |       | irc_0 |
| 0125  | 0111  |       | 12420 |
| 04    | 16    |       | 2     |
| hsa_c | hsa_c |       | hsa_c |
| irc_0 | irc_0 |       | irc_0 |
| 0125  | 0111  |       | 12630 |
| 05    | 17    |       | 0     |
| hsa_c | hsa_c |       | hsa_c |
| irc_0 | irc_0 |       | irc_0 |
| 0125  | 0111  |       | 12877 |
| 06    | 18    |       | 0     |
| hsa_c | hsa_c |       | hsa_c |
| irc_0 | irc_0 |       | irc_0 |
| 0125  | 0111  |       | 12879 |
| 07    | 19    |       | 3     |
| hsa_c | hsa_c |       | hsa_c |
| irc_0 | irc_0 |       | irc_0 |
| 0126  | 0078  |       | 12976 |
| 66    | 95    |       | 0     |
| hsa_c | hsa_c |       | hsa_c |
| irc_0 | irc_0 |       | irc_0 |
| 0126  | 0111  |       | 13022 |
| 67    | 25    |       | 0     |



|       |       |       |
|-------|-------|-------|
| hsa_c | hsa_c | hsa_c |
| irc_0 | irc_0 | irc_0 |
| 0126  | 0111  | 13295 |
| 69    | 37    | 8     |
| hsa_c | hsa_c | hsa_c |
| irc_0 | irc_0 | irc_0 |
| 0126  | 0111  | 13312 |
| 70    | 38    | 8     |
| hsa_c | hsa_c | hsa_c |
| irc_0 | irc_0 | irc_0 |
| 0126  | 0111  | 13519 |
| 71    | 39    | 0     |
| hsa_c | hsa_c | hsa_c |
| irc_0 | irc_0 | irc_0 |
| 0128  | 0111  | 13931 |
| 63    | 40    | 1     |
| hsa_c | hsa_c | hsa_c |
| irc_0 | irc_0 | irc_0 |
| 0129  | 0111  | 13977 |
| 63    | 41    | 9     |
| hsa_c | hsa_c | hsa_c |
| irc_0 | irc_0 | irc_0 |
| 0129  | 0111  | 14017 |
| 88    | 36    | 9     |
| hsa_c | hsa_c | hsa_c |
| irc_0 | irc_0 | irc_0 |
| 0130  | 0057  | 14017 |
| 14    | 0     | 7     |
| hsa_c | hsa_c | hsa_c |
| irc_0 | irc_0 | irc_0 |
| 0130  | 0111  | 13414 |
| 15    | 92    | 4     |
| hsa_c | hsa_c | hsa_c |
| irc_0 | irc_0 | irc_0 |
| 0130  | 0111  | 13295 |
| 16    | 93    | 7     |
| hsa_c | hsa_c | hsa_c |
| irc_0 | irc_0 | irc_0 |
| 0130  | 0111  | 12638 |
| 17    | 94    | 0     |
| hsa_c | hsa_c | hsa_c |
| irc_0 | irc_0 | irc_0 |
| 0130  | 0111  | 12437 |
| 86    | 96    | 7     |
| hsa_c | hsa_c | hsa_c |
| irc_0 | irc_0 | irc_0 |
| 0131  | 0111  | 11498 |
| 18    | 97    | 7     |
| hsa_c | hsa_c | hsa_c |
| irc_0 | irc_0 | irc_0 |
| 0131  | 0039  | 11498 |
| 29    | 04    | 5     |
| hsa_c | hsa_c | hsa_c |
| irc_0 | irc_0 | irc_0 |
| 0131  | 0112  | 11108 |

|       |       |       |
|-------|-------|-------|
| 30    | 06    | 3     |
| hsa_c | hsa_c | hsa_c |
| irc_0 | irc_0 | irc_0 |
| 0131  | 0112  | 11060 |
| 31    | 07    | 9     |
| hsa_c | hsa_c | hsa_c |
| irc_0 | irc_0 | irc_0 |
| 0131  | 0112  | 10847 |
| 46    | 08    | 3     |
| hsa_c | hsa_c | hsa_c |
| irc_0 | irc_0 | irc_0 |
| 0131  | 0112  | 10620 |
| 47    | 09    | 0     |
| hsa_c | hsa_c | hsa_c |
| irc_0 | irc_0 | irc_0 |
| 0132  | 0112  | 10550 |
| 10    | 10    | 2     |
| hsa_c | hsa_c | hsa_c |
| irc_0 | irc_0 | irc_0 |
| 0132  | 0112  | 10452 |
| 43    | 05    | 1     |
| hsa_c | hsa_c | hsa_c |
| irc_0 | irc_0 | irc_0 |
| 0133  | 0112  | 10243 |
| 03    | 12    | 6     |
| hsa_c | hsa_c | hsa_c |
| irc_0 | irc_0 | irc_0 |
| 0133  | 0113  | 09651 |
| 06    | 54    | 2     |
| hsa_c | hsa_c | hsa_c |
| irc_0 | irc_0 | irc_0 |
| 0133  | 0113  | 09592 |
| 07    | 60    | 8     |
| hsa_c | hsa_c | hsa_c |
| irc_0 | irc_0 | irc_0 |
| 0078  | 0113  | 09538 |
| 68    | 64    | 1     |
| hsa_c | hsa_c | hsa_c |
| irc_0 | irc_0 | irc_0 |
| 0066  | 0114  | 09505 |
| 95    | 13    | 6     |
| hsa_c | hsa_c | hsa_c |
| irc_0 | irc_0 | irc_0 |
| 0134  | 0114  | 08472 |
| 58    | 17    | 1     |
| hsa_c | hsa_c | hsa_c |
| irc_0 | irc_0 | irc_0 |
| 0134  | 0114  | 08390 |
| 59    | 16    | 5     |
| hsa_c | hsa_c | hsa_c |
| irc_0 | irc_0 | irc_0 |
| 0135  | 0114  | 08120 |
| 29    | 51    | 2     |
| hsa_c | hsa_c | hsa_c |

|       |       |       |
|-------|-------|-------|
| irc_0 | irc_0 | irc_0 |
| 0135  | 0114  | 07927 |
| 34    | 50    | 3     |
| hsa_c | hsa_c | hsa_c |
| irc_0 | irc_0 | irc_0 |
| 0135  | 0114  | 07738 |
| 35    | 49    | 8     |
| hsa_c | hsa_c | hsa_c |
| irc_0 | irc_0 | irc_0 |
| 0135  | 0114  | 06924 |
| 38    | 54    | 4     |
| hsa_c | hsa_c | hsa_c |
| irc_0 | irc_0 | irc_0 |
| 0135  | 0114  | 06091 |
| 39    | 74    | 8     |
| hsa_c | hsa_c | hsa_c |
| irc_0 | irc_0 | irc_0 |
| 0135  | 0043  | 06024 |
| 45    | 20    | 3     |
| hsa_c | hsa_c | hsa_c |
| irc_0 | irc_0 | irc_0 |
| 0135  | 0115  | 05525 |
| 52    | 21    | 0     |
| hsa_c | hsa_c | hsa_c |
| irc_0 | irc_0 | irc_0 |
| 0135  | 0115  | 05412 |
| 73    | 23    | 7     |
| hsa_c | hsa_c | hsa_c |
| irc_0 | irc_0 | irc_0 |
| 0135  | 0115  | 05337 |
| 75    | 24    | 5     |
| hsa_c | hsa_c | hsa_c |
| irc_0 | irc_0 | irc_0 |
| 0135  | 0037  | 05011 |
| 76    | 30    | 5     |
| hsa_c | hsa_c | hsa_c |
| irc_0 | irc_0 | irc_0 |
| 0135  | 0115  | 03617 |
| 79    | 59    | 3     |
| hsa_c | hsa_c | hsa_c |
| irc_0 | irc_0 | irc_0 |
| 0135  | 0115  | 03465 |
| 81    | 60    | 4     |
| hsa_c | hsa_c | hsa_c |
| irc_0 | irc_0 | irc_0 |
| 0135  | 0116  | 03241 |
| 83    | 17    | 9     |
| hsa_c | hsa_c | hsa_c |
| irc_0 | irc_0 | irc_0 |
| 0135  | 0116  | 02678 |
| 84    | 23    | 2     |
| hsa_c | hsa_c | hsa_c |
| irc_0 | irc_0 | irc_0 |
| 0135  | 0116  | 02599 |
| 85    | 71    | 6     |

|       |       |       |
|-------|-------|-------|
| hsa_c | hsa_c | hsa_c |
| irc_0 | irc_0 | irc_0 |
| 0135  | 0116  | 02012 |
| 86    | 87    | 7     |
| hsa_c | hsa_c | hsa_c |
| irc_0 | irc_0 | irc_0 |
| 0136  | 0117  | 01760 |
| 05    | 11    | 8     |
| hsa_c | hsa_c | hsa_c |
| irc_0 | irc_0 | irc_0 |
| 0136  | 0117  | 01516 |
| 28    | 13    | 4     |
| hsa_c | hsa_c | hsa_c |
| irc_0 | irc_0 | irc_0 |
| 0136  | 0117  | 01408 |
| 38    | 15    | 4     |
| hsa_c | hsa_c | hsa_c |
| irc_0 | irc_0 | irc_0 |
| 0136  | 0117  | 01376 |
| 81    | 16    | 0     |
| hsa_c | hsa_c | hsa_c |
| irc_0 | irc_0 | irc_0 |
| 0136  | 0117  | 00543 |
| 82    | 53    | 5     |
| hsa_c | hsa_c | hsa_c |
| irc_0 | irc_0 | irc_0 |
| 0136  | 0117  | 00536 |
| 84    | 54    | 8     |
| hsa_c | hsa_c | hsa_c |
| irc_0 | irc_0 | irc_0 |
| 0136  | 0117  | 00522 |
| 85    | 55    | 9     |
| hsa_c | hsa_c | hsa_c |
| irc_0 | irc_0 | irc_0 |
| 0136  | 0117  | 00430 |
| 87    | 56    | 0     |
| hsa_c | hsa_c | hsa_c |
| irc_0 | irc_0 | irc_0 |
| 0136  | 0117  | 00380 |
| 88    | 69    | 6     |
| hsa_c | hsa_c | hsa_c |
| irc_0 | irc_0 | irc_0 |
| 0136  | 0117  | 00336 |
| 89    | 70    | 9     |
| hsa_c | hsa_c | hsa_c |
| irc_0 | irc_0 | irc_0 |
| 0136  | 0117  | 00067 |
| 92    | 71    | 6     |
| hsa_c | hsa_c | hsa_c |
| irc_0 | irc_0 | irc_0 |
| 0137  | 0117  | 02238 |
| 49    | 72    | 2     |
| hsa_c | hsa_c | hsa_c |
| irc_0 | irc_0 | irc_0 |
| 0137  | 0117  | 08343 |

|       |       |       |
|-------|-------|-------|
| 50    | 73    | 2     |
| hsa_c | hsa_c | hsa_c |
| irc_0 | irc_0 | irc_0 |
| 0137  | 0117  | 10244 |
| 51    | 74    | 6     |
| hsa_c | hsa_c |       |
| irc_0 | irc_0 |       |
| 0137  | 0117  |       |
| 52    | 75    |       |
| hsa_c | hsa_c |       |
| irc_0 | irc_0 |       |
| 0057  | 0117  |       |
| 37    | 77    |       |
| hsa_c | hsa_c |       |
| irc_0 | irc_0 |       |
| 0067  | 0117  |       |
| 44    | 78    |       |
| hsa_c | hsa_c |       |
| irc_0 | irc_0 |       |
| 0075  | 0117  |       |
| 26    | 79    |       |
| hsa_c | hsa_c |       |
| irc_0 | irc_0 |       |
| 0086  | 0118  |       |
| 63    | 49    |       |
| hsa_c | hsa_c |       |
| irc_0 | irc_0 |       |
| 0137  | 0118  |       |
| 85    | 50    |       |
| hsa_c | hsa_c |       |
| irc_0 | irc_0 |       |
| 0137  | 0118  |       |
| 91    | 51    |       |
| hsa_c | hsa_c |       |
| irc_0 | irc_0 |       |
| 0137  | 0118  |       |
| 96    | 52    |       |
| hsa_c | hsa_c |       |
| irc_0 | irc_0 |       |
| 0137  | 0118  |       |
| 92    | 99    |       |
| hsa_c | hsa_c |       |
| irc_0 | irc_0 |       |
| 0137  | 0119  |       |
| 94    | 17    |       |
| hsa_c | hsa_c |       |
| irc_0 | irc_0 |       |
| 0137  | 0119  |       |
| 95    | 27    |       |
| hsa_c | hsa_c |       |
| irc_0 | irc_0 |       |
| 0138  | 0120  |       |
| 00    | 10    |       |
| hsa_c | hsa_c |       |

|       |       |
|-------|-------|
| irc_0 | irc_0 |
| 0138  | 0120  |
| 28    | 32    |
| hsa_c | hsa_c |
| irc_0 | irc_0 |
| 0138  | 0120  |
| 29    | 34    |
| hsa_c | hsa_c |
| irc_0 | irc_0 |
| 0047  | 0120  |
| 84    | 35    |
| hsa_c | hsa_c |
| irc_0 | irc_0 |
| 0066  | 0120  |
| 43    | 40    |
| hsa_c | hsa_c |
| irc_0 | irc_0 |
| 0029  | 0120  |
| 78    | 42    |
| hsa_c | hsa_c |
| irc_0 | irc_0 |
| 0138  | 0120  |
| 60    | 43    |
| hsa_c | hsa_c |
| irc_0 | irc_0 |
| 0029  | 0120  |
| 56    | 44    |
| hsa_c | hsa_c |
| irc_0 | irc_0 |
| 0040  | 0121  |
| 51    | 05    |
| hsa_c | hsa_c |
| irc_0 | irc_0 |
| 0138  | 0121  |
| 61    | 80    |
| hsa_c | hsa_c |
| irc_0 | irc_0 |
| 0054  | 0122  |
| 31    | 22    |
| hsa_c | hsa_c |
| irc_0 | irc_0 |
| 0138  | 0123  |
| 62    | 30    |
| hsa_c | hsa_c |
| irc_0 | irc_0 |
| 0138  | 0123  |
| 64    | 31    |
| hsa_c | hsa_c |
| irc_0 | irc_0 |
| 0138  | 0123  |
| 65    | 27    |
| hsa_c | hsa_c |
| irc_0 | irc_0 |
| 0138  | 0081  |
| 66    | 97    |

|       |       |
|-------|-------|
| hsa_c | hsa_c |
| irc_0 | irc_0 |
| 0138  | 0123  |
| 67    | 91    |
| hsa_c | hsa_c |
| irc_0 | irc_0 |
| 0138  | 0123  |
| 92    | 93    |
| hsa_c | hsa_c |
| irc_0 | irc_0 |
| 0138  | 0123  |
| 93    | 94    |
| hsa_c | hsa_c |
| irc_0 | irc_0 |
| 0138  | 0123  |
| 94    | 95    |
| hsa_c | hsa_c |
| irc_0 | irc_0 |
| 0138  | 0123  |
| 97    | 96    |
| hsa_c | hsa_c |
| irc_0 | irc_0 |
| 0139  | 0123  |
| 01    | 97    |
| hsa_c | hsa_c |
| irc_0 | irc_0 |
| 0139  | 0123  |
| 03    | 98    |
| hsa_c | hsa_c |
| irc_0 | irc_0 |
| 0039  | 0123  |
| 53    | 99    |
| hsa_c | hsa_c |
| irc_0 | irc_0 |
| 0073  | 0124  |
| 59    | 00    |
| hsa_c | hsa_c |
| irc_0 | irc_0 |
| 0076  | 0125  |
| 36    | 31    |
| hsa_c | hsa_c |
| irc_0 | irc_0 |
| 0084  | 0125  |
| 42    | 32    |
| hsa_c | hsa_c |
| irc_0 | irc_0 |
| 0139  | 0125  |
| 34    | 37    |
| hsa_c | hsa_c |
| irc_0 | irc_0 |
| 0139  | 0125  |
| 35    | 38    |
| hsa_c | hsa_c |
| irc_0 | irc_0 |
| 0139  | 0125  |

|       |       |
|-------|-------|
| 36    | 39    |
| hsa_c | hsa_c |
| irc_0 | irc_0 |
| 0139  | 0125  |
| 37    | 41    |
| hsa_c | hsa_c |
| irc_0 | irc_0 |
| 0140  | 0125  |
| 28    | 43    |
| hsa_c | hsa_c |
| irc_0 | irc_0 |
| 0140  | 0125  |
| 43    | 44    |
| hsa_c | hsa_c |
| irc_0 | irc_0 |
| 0140  | 0125  |
| 45    | 88    |
| hsa_c | hsa_c |
| irc_0 | irc_0 |
| 0141  | 0066  |
| 06    | 76    |
| hsa_c | hsa_c |
| irc_0 | irc_0 |
| 0142  | 0126  |
| 46    | 00    |
| hsa_c | hsa_c |
| irc_0 | irc_0 |
| 0142  | 0126  |
| 47    | 01    |
| hsa_c | hsa_c |
| irc_0 | irc_0 |
| 0142  | 0126  |
| 48    | 02    |
| hsa_c | hsa_c |
| irc_0 | irc_0 |
| 0142  | 0126  |
| 49    | 03    |
| hsa_c | hsa_c |
| irc_0 | irc_0 |
| 0142  | 0126  |
| 50    | 04    |
| hsa_c | hsa_c |
| irc_0 | irc_0 |
| 0142  | 0126  |
| 51    | 05    |
| hsa_c | hsa_c |
| irc_0 | irc_0 |
| 0142  | 0126  |
| 52    | 06    |
| hsa_c | hsa_c |
| irc_0 | irc_0 |
| 0142  | 0126  |
| 53    | 07    |
| hsa_c | hsa_c |



|       |       |
|-------|-------|
| irc_0 | irc_0 |
| 0142  | 0126  |
| 54    | 26    |
| hsa_c | hsa_c |
| irc_0 | irc_0 |
| 0142  | 0126  |
| 55    | 27    |
| hsa_c | hsa_c |
| irc_0 | irc_0 |
| 0143  | 0126  |
| 22    | 28    |
| hsa_c | hsa_c |
| irc_0 | irc_0 |
| 0143  | 0126  |
| 23    | 29    |
| hsa_c | hsa_c |
| irc_0 | irc_0 |
| 0143  | 0126  |
| 24    | 30    |
| hsa_c | hsa_c |
| irc_0 | irc_0 |
| 0143  | 0126  |
| 25    | 66    |
| hsa_c | hsa_c |
| irc_0 | irc_0 |
| 0143  | 0126  |
| 26    | 67    |
| hsa_c | hsa_c |
| irc_0 | irc_0 |
| 0143  | 0126  |
| 27    | 68    |
| hsa_c | hsa_c |
| irc_0 | irc_0 |
| 0143  | 0126  |
| 28    | 69    |
| hsa_c | hsa_c |
| irc_0 | irc_0 |
| 0143  | 0126  |
| 29    | 70    |
| hsa_c | hsa_c |
| irc_0 | irc_0 |
| 0143  | 0126  |
| 30    | 84    |
| hsa_c | hsa_c |
| irc_0 | irc_0 |
| 0143  | 0126  |
| 31    | 89    |
| hsa_c | hsa_c |
| irc_0 | irc_0 |
| 0143  | 0126  |
| 32    | 91    |
| hsa_c | hsa_c |
| irc_0 | irc_0 |
| 0143  | 0126  |
| 33    | 94    |

|       |       |
|-------|-------|
| hsa_c | hsa_c |
| irc_0 | irc_0 |
| 0144  | 0126  |
| 07    | 96    |
| hsa_c | hsa_c |
| irc_0 | irc_0 |
| 0144  | 0126  |
| 31    | 98    |
| hsa_c | hsa_c |
| irc_0 | irc_0 |
| 0148  | 0126  |
| 53    | 99    |
| hsa_c | hsa_c |
| irc_0 | irc_0 |
| 0148  | 0127  |
| 54    | 00    |
| hsa_c | hsa_c |
| irc_0 | irc_0 |
| 0148  | 0127  |
| 55    | 03    |
| hsa_c | hsa_c |
| irc_0 | irc_0 |
| 0148  | 0127  |
| 56    | 62    |
| hsa_c | hsa_c |
| irc_0 | irc_0 |
| 0148  | 0128  |
| 57    | 01    |
| hsa_c | hsa_c |
| irc_0 | irc_0 |
| 0088  | 0128  |
| 57    | 03    |
| hsa_c | hsa_c |
| irc_0 | irc_0 |
| 0150  | 0128  |
| 17    | 04    |
| hsa_c | hsa_c |
| irc_0 | irc_0 |
| 0150  | 0128  |
| 18    | 07    |
| hsa_c | hsa_c |
| irc_0 | irc_0 |
| 0150  | 0128  |
| 20    | 08    |
| hsa_c | hsa_c |
| irc_0 | irc_0 |
| 0150  | 0128  |
| 25    | 09    |
| hsa_c | hsa_c |
| irc_0 | irc_0 |
| 0150  | 0128  |
| 28    | 10    |
| hsa_c | hsa_c |
| irc_0 | irc_0 |
| 0150  | 0128  |

|       |       |
|-------|-------|
| 29    | 41    |
| hsa_c | hsa_c |
| irc_0 | irc_0 |
| 0150  | 0148  |
| 30    | 3     |
| hsa_c | hsa_c |
| irc_0 | irc_0 |
| 0150  | 0128  |
| 31    | 63    |
| hsa_c | hsa_c |
| irc_0 | irc_0 |
| 0150  | 0129  |
| 33    | 23    |
| hsa_c | hsa_c |
| irc_0 | irc_0 |
| 0151  | 0129  |
| 64    | 31    |
| hsa_c | hsa_c |
| irc_0 | irc_0 |
| 0151  | 0130  |
| 65    | 47    |
| hsa_c | hsa_c |
| irc_0 | irc_0 |
| 0151  | 0130  |
| 66    | 48    |
| hsa_c | hsa_c |
| irc_0 | irc_0 |
| 0153  | 0130  |
| 39    | 49    |
| hsa_c | hsa_c |
| irc_0 | irc_0 |
| 0154  | 0130  |
| 18    | 53    |
| hsa_c | hsa_c |
| irc_0 | irc_0 |
| 0154  | 0130  |
| 58    | 54    |
| hsa_c | hsa_c |
| irc_0 | irc_0 |
| 0154  | 0130  |
| 96    | 55    |
| hsa_c | hsa_c |
| irc_0 | irc_0 |
| 0154  | 0130  |
| 97    | 76    |
| hsa_c | hsa_c |
| irc_0 | irc_0 |
| 0154  | 0130  |
| 99    | 77    |
| hsa_c | hsa_c |
| irc_0 | irc_0 |
| 0155  | 0130  |
| 00    | 78    |
| hsa_c | hsa_c |

|       |       |
|-------|-------|
| irc_0 | irc_0 |
| 0155  | 0130  |
| 02    | 79    |
| hsa_c | hsa_c |
| irc_0 | irc_0 |
| 0155  | 0130  |
| 03    | 80    |
| hsa_c | hsa_c |
| irc_0 | irc_0 |
| 0036  | 0131  |
| 83    | 25    |
| hsa_c | hsa_c |
| irc_0 | irc_0 |
| 0155  | 0131  |
| 22    | 29    |
| hsa_c | hsa_c |
| irc_0 | irc_0 |
| 0156  | 0131  |
| 10    | 30    |
| hsa_c | hsa_c |
| irc_0 | irc_0 |
| 0156  | 0131  |
| 18    | 31    |
| hsa_c | hsa_c |
| irc_0 | irc_0 |
| 0156  | 0057  |
| 19    | 20    |
| hsa_c | hsa_c |
| irc_0 | irc_0 |
| 0156  | 0173  |
| 21    | 2     |
| hsa_c | hsa_c |
| irc_0 | irc_0 |
| 0156  | 0133  |
| 22    | 08    |
| hsa_c | hsa_c |
| irc_0 | irc_0 |
| 0156  | 0133  |
| 23    | 44    |
| hsa_c | hsa_c |
| irc_0 | irc_0 |
| 0156  | 0133  |
| 24    | 67    |
| hsa_c | hsa_c |
| irc_0 | irc_0 |
| 0156  | 0134  |
| 25    | 15    |
| hsa_c | hsa_c |
| irc_0 | irc_0 |
| 0156  | 0134  |
| 26    | 17    |
| hsa_c | hsa_c |
| irc_0 | irc_0 |
| 0156  | 0134  |
| 27    | 18    |

|       |       |
|-------|-------|
| hsa_c | hsa_c |
| irc_0 | irc_0 |
| 0156  | 0134  |
| 81    | 19    |
| hsa_c | hsa_c |
| irc_0 | irc_0 |
| 0156  | 0134  |
| 82    | 20    |
| hsa_c | hsa_c |
| irc_0 | irc_0 |
| 0156  | 0134  |
| 84    | 21    |
| hsa_c | hsa_c |
| irc_0 | irc_0 |
| 0156  | 0134  |
| 86    | 25    |
| hsa_c | hsa_c |
| irc_0 | irc_0 |
| 0158  | 0134  |
| 32    | 27    |
| hsa_c | hsa_c |
| irc_0 | irc_0 |
| 0158  | 0134  |
| 94    | 28    |
| hsa_c | hsa_c |
| irc_0 | irc_0 |
| 0158  | 0135  |
| 96    | 08    |
| hsa_c | hsa_c |
| irc_0 | irc_0 |
| 0158  | 0135  |
| 97    | 09    |
| hsa_c | hsa_c |
| irc_0 | irc_0 |
| 0158  | 0135  |
| 98    | 10    |
| hsa_c | hsa_c |
| irc_0 | irc_0 |
| 0158  | 0135  |
| 99    | 11    |
| hsa_c | hsa_c |
| irc_0 | irc_0 |
| 0159  | 0135  |
| 20    | 12    |
| hsa_c | hsa_c |
| irc_0 | irc_0 |
| 0159  | 0135  |
| 30    | 13    |
| hsa_c | hsa_c |
| irc_0 | irc_0 |
| 0159  | 0135  |
| 37    | 45    |
| hsa_c | hsa_c |
| irc_0 | irc_0 |
| 0159  | 0136  |

|       |       |
|-------|-------|
| 38    | 05    |
| hsa_c | hsa_c |
| irc_0 | irc_0 |
| 0159  | 0136  |
| 46    | 06    |
| hsa_c | hsa_c |
| irc_0 | irc_0 |
| 0159  | 0136  |
| 47    | 27    |
| hsa_c | hsa_c |
| irc_0 | irc_0 |
| 0159  | 0136  |
| 48    | 41    |
| hsa_c | hsa_c |
| irc_0 | irc_0 |
| 0159  | 0136  |
| 49    | 56    |
| hsa_c | hsa_c |
| irc_0 | irc_0 |
| 0159  | 0136  |
| 50    | 51    |
| hsa_c | hsa_c |
| irc_0 | irc_0 |
| 0159  | 0136  |
| 71    | 59    |
| hsa_c | hsa_c |
| irc_0 | irc_0 |
| 0161  | 0022  |
| 30    | 33    |
| hsa_c | hsa_c |
| irc_0 | irc_0 |
| 0161  | 0137  |
| 79    | 49    |
| hsa_c | hsa_c |
| irc_0 | irc_0 |
| 0161  | 0137  |
| 80    | 50    |
| hsa_c | hsa_c |
| irc_0 | irc_0 |
| 0162  | 0137  |
| 02    | 51    |
| hsa_c | hsa_c |
| irc_0 | irc_0 |
| 0162  | 0137  |
| 03    | 52    |
| hsa_c | hsa_c |
| irc_0 | irc_0 |
| 0162  | 0137  |
| 18    | 53    |
| hsa_c | hsa_c |
| irc_0 | irc_0 |
| 0164  | 0137  |
| 21    | 60    |
| hsa_c | hsa_c |

|       |       |
|-------|-------|
| irc_0 | irc_0 |
| 0164  | 0137  |
| 23    | 61    |
| hsa_c | hsa_c |
| irc_0 | irc_0 |
| 0164  | 0137  |
| 40    | 62    |
| hsa_c | hsa_c |
| irc_0 | irc_0 |
| 0164  | 0137  |
| 80    | 65    |
| hsa_c | hsa_c |
| irc_0 | irc_0 |
| 0164  | 0138  |
| 83    | 06    |
| hsa_c | hsa_c |
| irc_0 | irc_0 |
| 0164  | 0138  |
| 84    | 00    |
| hsa_c | hsa_c |
| irc_0 | irc_0 |
| 0165  | 0044  |
| 24    | 34    |
| hsa_c | hsa_c |
| irc_0 | irc_0 |
| 0031  | 0138  |
| 63    | 29    |
| hsa_c | hsa_c |
| irc_0 | irc_0 |
| 0168  | 0029  |
| 97    | 78    |
| hsa_c | hsa_c |
| irc_0 | irc_0 |
| 0169  | 0047  |
| 99    | 84    |
| hsa_c | hsa_c |
| irc_0 | irc_0 |
| 0171  | 0066  |
| 77    | 43    |
| hsa_c | hsa_c |
| irc_0 | irc_0 |
| 0171  | 0138  |
| 95    | 31    |
| hsa_c | hsa_c |
| irc_0 | irc_0 |
| 0172  | 0138  |
| 18    | 32    |
| hsa_c | hsa_c |
| irc_0 | irc_0 |
| 0172  | 0138  |
| 21    | 33    |
| hsa_c | hsa_c |
| irc_0 | irc_0 |
| 0172  | 0138  |
| 22    | 34    |

|       |       |
|-------|-------|
| hsa_c | hsa_c |
| irc_0 | irc_0 |
| 0172  | 0138  |
| 23    | 35    |
| hsa_c | hsa_c |
| irc_0 | irc_0 |
| 0172  | 0138  |
| 24    | 36    |
| hsa_c | hsa_c |
| irc_0 | irc_0 |
| 0172  | 0138  |
| 25    | 37    |
| hsa_c | hsa_c |
| irc_0 | irc_0 |
| 0172  | 0138  |
| 26    | 28    |
| hsa_c | hsa_c |
| irc_0 | irc_0 |
| 0172  | 0138  |
| 27    | 61    |
| hsa_c | hsa_c |
| irc_0 | irc_0 |
| 0022  | 0138  |
| 40    | 64    |
| hsa_c | hsa_c |
| irc_0 | irc_0 |
| 0172  | 0138  |
| 42    | 65    |
| hsa_c | hsa_c |
| irc_0 | irc_0 |
| 0172  | 0138  |
| 43    | 67    |
| hsa_c | hsa_c |
| irc_0 | irc_0 |
| 0172  | 0138  |
| 44    | 87    |
| hsa_c | hsa_c |
| irc_0 | irc_0 |
| 0172  | 0039  |
| 45    | 53    |
| hsa_c | hsa_c |
| irc_0 | irc_0 |
| 0172  | 0073  |
| 46    | 59    |
| hsa_c | hsa_c |
| irc_0 | irc_0 |
| 0172  | 0076  |
| 47    | 36    |
| hsa_c | hsa_c |
| irc_0 | irc_0 |
| 0172  | 0084  |
| 48    | 42    |
| hsa_c | hsa_c |
| irc_0 | irc_0 |
| 0146  | 0139  |



|       |       |
|-------|-------|
| 9     | 56    |
| hsa_c | hsa_c |
| irc_0 | irc_0 |
| 0524  | 0139  |
| 32    | 34    |
| hsa_c | hsa_c |
| irc_0 | irc_0 |
| 0524  | 0139  |
| 33    | 35    |
| hsa_c | hsa_c |
| irc_0 | irc_0 |
| 0524  | 0139  |
| 34    | 36    |
| hsa_c | hsa_c |
| irc_0 | irc_0 |
| 0524  | 0139  |
| 35    | 37    |
| hsa_c | hsa_c |
| irc_0 | irc_0 |
| 0524  | 0139  |
| 36    | 42    |
| hsa_c | hsa_c |
| irc_0 | irc_0 |
| 0524  | 0060  |
| 37    | 61    |
| hsa_c | hsa_c |
| irc_0 | irc_0 |
| 0524  | 0066  |
| 38    | 79    |
| hsa_c | hsa_c |
| irc_0 | irc_0 |
| 0524  | 0139  |
| 39    | 74    |
| hsa_c | hsa_c |
| irc_0 | irc_0 |
| 0524  | 0139  |
| 40    | 76    |
| hsa_c | hsa_c |
| irc_0 | irc_0 |
| 0524  | 0139  |
| 41    | 78    |
| hsa_c | hsa_c |
| irc_0 | irc_0 |
| 0524  | 0043  |
| 84    | 00    |
| hsa_c | hsa_c |
| irc_0 | irc_0 |
| 0525  | 0139  |
| 38    | 97    |
| hsa_c | hsa_c |
| irc_0 | irc_0 |
| 0525  | 0139  |
| 42    | 98    |
| hsa_c | hsa_c |

|       |       |
|-------|-------|
| irc_0 | irc_0 |
| 0525  | 0139  |
| 43    | 99    |
| hsa_c | hsa_c |
| irc_0 | irc_0 |
| 0525  | 0140  |
| 46    | 55    |
| hsa_c | hsa_c |
| irc_0 | irc_0 |
| 0525  | 0140  |
| 47    | 62    |
| hsa_c | hsa_c |
| irc_0 | irc_0 |
| 0525  | 0140  |
| 48    | 67    |
| hsa_c | hsa_c |
| irc_0 | irc_0 |
| 0525  | 0140  |
| 49    | 70    |
| hsa_c | hsa_c |
| irc_0 | irc_0 |
| 0525  | 0140  |
| 50    | 72    |
| hsa_c | hsa_c |
| irc_0 | irc_0 |
| 0525  | 0140  |
| 51    | 73    |
| hsa_c | hsa_c |
| irc_0 | irc_0 |
| 0526  | 0140  |
| 79    | 75    |
| hsa_c | hsa_c |
| irc_0 | irc_0 |
| 0526  | 0140  |
| 80    | 84    |
| hsa_c | hsa_c |
| irc_0 | irc_0 |
| 0528  | 0140  |
| 82    | 85    |
| hsa_c | hsa_c |
| irc_0 | irc_0 |
| 0528  | 0068  |
| 83    | 17    |
| hsa_c | hsa_c |
| irc_0 | irc_0 |
| 0528  | 0142  |
| 84    | 43    |
| hsa_c | hsa_c |
| irc_0 | irc_0 |
| 0528  | 0142  |
| 85    | 84    |
| hsa_c | hsa_c |
| irc_0 | irc_0 |
| 0528  | 0143  |
| 91    | 11    |

|       |       |
|-------|-------|
| hsa_c | hsa_c |
| irc_0 | irc_0 |
| 0528  | 0143  |
| 86    | 42    |
| hsa_c | hsa_c |
| irc_0 | irc_0 |
| 0528  | 0143  |
| 87    | 30    |
| hsa_c | hsa_c |
| irc_0 | irc_0 |
| 0528  | 0144  |
| 88    | 07    |
| hsa_c | hsa_c |
| irc_0 | irc_0 |
| 0528  | 0144  |
| 89    | 69    |
| hsa_c | hsa_c |
| irc_0 | irc_0 |
| 0528  | 0144  |
| 90    | 67    |
| hsa_c | hsa_c |
| irc_0 | irc_0 |
| 0531  | 0145  |
| 76    | 00    |
| hsa_c | hsa_c |
| irc_0 | irc_0 |
| 0531  | 0145  |
| 79    | 09    |
| hsa_c | hsa_c |
| irc_0 | irc_0 |
| 0531  | 0145  |
| 92    | 16    |
| hsa_c | hsa_c |
| irc_0 | irc_0 |
| 0531  | 0145  |
| 97    | 17    |
| hsa_c | hsa_c |
| irc_0 | irc_0 |
| 0532  | 0145  |
| 04    | 18    |
| hsa_c | hsa_c |
| irc_0 | irc_0 |
| 0532  | 0145  |
| 05    | 19    |
| hsa_c | hsa_c |
| irc_0 | irc_0 |
| 0532  | 0145  |
| 06    | 15    |
| hsa_c | hsa_c |
| irc_0 | irc_0 |
| 0532  | 0145  |
| 07    | 46    |
| hsa_c | hsa_c |
| irc_0 | irc_0 |
| 0532  | 0146  |

|       |       |
|-------|-------|
| 10    | 67    |
| hsa_c | hsa_c |
| irc_0 | irc_0 |
| 0532  | 0146  |
| 11    | 66    |
| hsa_c | hsa_c |
| irc_0 | irc_0 |
| 0533  | 0146  |
| 79    | 76    |
| hsa_c | hsa_c |
| irc_0 | irc_0 |
| 0533  | 0146  |
| 84    | 86    |
| hsa_c | hsa_c |
| irc_0 | irc_0 |
| 0533  | 0146  |
| 85    | 87    |
| hsa_c | hsa_c |
| irc_0 | irc_0 |
| 0533  | 0146  |
| 86    | 88    |
| hsa_c | hsa_c |
| irc_0 | irc_0 |
| 0533  | 0146  |
| 87    | 89    |
| hsa_c | hsa_c |
| irc_0 | irc_0 |
| 0533  | 0146  |
| 88    | 90    |
| hsa_c | hsa_c |
| irc_0 | irc_0 |
| 0533  | 0146  |
| 89    | 91    |
| hsa_c | hsa_c |
| irc_0 | irc_0 |
| 0533  | 0146  |
| 90    | 85    |
| hsa_c | hsa_c |
| irc_0 | irc_0 |
| 0073  | 0147  |
| 37    | 03    |
| hsa_c | hsa_c |
| irc_0 | irc_0 |
| 0534  | 0147  |
| 33    | 04    |
| hsa_c | hsa_c |
| irc_0 | irc_0 |
| 0534  | 0147  |
| 34    | 05    |
| hsa_c | hsa_c |
| irc_0 | irc_0 |
| 0534  | 0147  |
| 35    | 02    |
| hsa_c | hsa_c |

|       |       |
|-------|-------|
| irc_0 | irc_0 |
| 0534  | 0147  |
| 36    | 36    |
| hsa_c | hsa_c |
| irc_0 | irc_0 |
| 0534  | 0147  |
| 37    | 71    |
| hsa_c | hsa_c |
| irc_0 | irc_0 |
| 0534  | 0147  |
| 38    | 72    |
| hsa_c | hsa_c |
| irc_0 | irc_0 |
| 0534  | 0147  |
| 42    | 70    |
| hsa_c | hsa_c |
| irc_0 | irc_0 |
| 0534  | 0148  |
| 43    | 06    |
| hsa_c | hsa_c |
| irc_0 | irc_0 |
| 0534  | 0148  |
| 44    | 07    |
| hsa_c | hsa_c |
| irc_0 | irc_0 |
| 0214  | 0148  |
| 6     | 08    |
| hsa_c | hsa_c |
| irc_0 | irc_0 |
| 0128  | 0148  |
| 7     | 09    |
| hsa_c | hsa_c |
| irc_0 | irc_0 |
| 0538  | 0148  |
| 59    | 10    |
| hsa_c | hsa_c |
| irc_0 | irc_0 |
| 0538  | 0148  |
| 60    | 11    |
| hsa_c | hsa_c |
| irc_0 | irc_0 |
| 0538  | 0148  |
| 61    | 05    |
| hsa_c | hsa_c |
| irc_0 | irc_0 |
| 0538  | 0148  |
| 62    | 61    |
| hsa_c | hsa_c |
| irc_0 | irc_0 |
| 0538  | 0148  |
| 63    | 60    |
| hsa_c | hsa_c |
| irc_0 | irc_0 |
| 0538  | 0148  |
| 64    | 68    |

|       |       |
|-------|-------|
| hsa_c | hsa_c |
| irc_0 | irc_0 |
| 0027  | 0148  |
| 35    | 69    |
| hsa_c | hsa_c |
| irc_0 | irc_0 |
| 0059  | 0148  |
| 10    | 67    |
| hsa_c | hsa_c |
| irc_0 | irc_0 |
| 0538  | 0148  |
| 89    | 80    |
| hsa_c | hsa_c |
| irc_0 | irc_0 |
| 0538  | 0150  |
| 90    | 97    |
| hsa_c | hsa_c |
| irc_0 | irc_0 |
| 0538  | 0150  |
| 92    | 99    |
| hsa_c | hsa_c |
| irc_0 | irc_0 |
| 0538  | 0150  |
| 97    | 96    |
| hsa_c | hsa_c |
| irc_0 | irc_0 |
| 0538  | 0151  |
| 93    | 65    |
| hsa_c | hsa_c |
| irc_0 | irc_0 |
| 0538  | 0151  |
| 94    | 64    |
| hsa_c | hsa_c |
| irc_0 | irc_0 |
| 0538  | 0080  |
| 95    | 3     |
| hsa_c | hsa_c |
| irc_0 | irc_0 |
| 0538  | 0151  |
| 96    | 99    |
| hsa_c | hsa_c |
| irc_0 | irc_0 |
| 0060  | 0152  |
| 04    | 04    |
| hsa_c | hsa_c |
| irc_0 | irc_0 |
| 0067  | 0152  |
| 46    | 12    |
| hsa_c | hsa_c |
| irc_0 | irc_0 |
| 0539  | 0152  |
| 44    | 13    |
| hsa_c | hsa_c |
| irc_0 | irc_0 |
| 0539  | 0152  |

|       |       |
|-------|-------|
| 45    | 14    |
| hsa_c | hsa_c |
| irc_0 | irc_0 |
| 0539  | 0152  |
| 46    | 22    |
| hsa_c | hsa_c |
| irc_0 | irc_0 |
| 0541  | 0152  |
| 10    | 23    |
| hsa_c | hsa_c |
| irc_0 | irc_0 |
| 0541  | 0152  |
| 68    | 26    |
| hsa_c | hsa_c |
| irc_0 | irc_0 |
| 0541  | 0152  |
| 81    | 18    |
| hsa_c | hsa_c |
| irc_0 | irc_0 |
| 0541  | 0022  |
| 82    | 69    |
| hsa_c | hsa_c |
| irc_0 | irc_0 |
| 0542  | 0152  |
| 69    | 59    |
| hsa_c | hsa_c |
| irc_0 | irc_0 |
| 0542  | 0152  |
| 71    | 60    |
| hsa_c | hsa_c |
| irc_0 | irc_0 |
| 0542  | 0152  |
| 75    | 61    |
| hsa_c | hsa_c |
| irc_0 | irc_0 |
| 0542  | 0152  |
| 78    | 62    |
| hsa_c | hsa_c |
| irc_0 | irc_0 |
| 0542  | 0152  |
| 79    | 63    |
| hsa_c | hsa_c |
| irc_0 | irc_0 |
| 0542  | 0152  |
| 82    | 58    |
| hsa_c | hsa_c |
| irc_0 | irc_0 |
| 0542  | 0190  |
| 83    | 3     |
| hsa_c | hsa_c |
| irc_0 | irc_0 |
| 0542  | 0152  |
| 85    | 75    |
| hsa_c | hsa_c |

|       |       |
|-------|-------|
| irc_0 | irc_0 |
| 0542  | 0152  |
| 93    | 73    |
| hsa_c | hsa_c |
| irc_0 | irc_0 |
| 0542  | 0152  |
| 97    | 82    |
| hsa_c | hsa_c |
| irc_0 | irc_0 |
| 0542  | 0153  |
| 99    | 15    |
| hsa_c | hsa_c |
| irc_0 | irc_0 |
| 0543  | 0153  |
| 00    | 17    |
| hsa_c | hsa_c |
| irc_0 | irc_0 |
| 0543  | 0153  |
| 01    | 12    |
| hsa_c | hsa_c |
| irc_0 | irc_0 |
| 0543  | 0154  |
| 02    | 74    |
| hsa_c | hsa_c |
| irc_0 | irc_0 |
| 0543  | 0154  |
| 03    | 90    |
| hsa_c | hsa_c |
| irc_0 | irc_0 |
| 0543  | 0154  |
| 04    | 91    |
| hsa_c | hsa_c |
| irc_0 | irc_0 |
| 0543  | 0076  |
| 05    | 52    |
| hsa_c | hsa_c |
| irc_0 | irc_0 |
| 0543  | 0155  |
| 06    | 10    |
| hsa_c | hsa_c |
| irc_0 | irc_0 |
| 0055  | 0155  |
| 39    | 11    |
| hsa_c | hsa_c |
| irc_0 | irc_0 |
| 0543  | 0155  |
| 33    | 12    |
| hsa_c | hsa_c |
| irc_0 | irc_0 |
| 0543  | 0155  |
| 34    | 13    |
| hsa_c | hsa_c |
| irc_0 | irc_0 |
| 0543  | 0155  |
| 35    | 14    |



|       |       |
|-------|-------|
| hsa_c | hsa_c |
| irc_0 | irc_0 |
| 0543  | 0155  |
| 36    | 09    |
| hsa_c | hsa_c |
| irc_0 | irc_0 |
| 0543  | 0155  |
| 37    | 45    |
| hsa_c | hsa_c |
| irc_0 | irc_0 |
| 0543  | 0156  |
| 38    | 81    |
| hsa_c | hsa_c |
| irc_0 | irc_0 |
| 0543  | 0156  |
| 39    | 82    |
| hsa_c | hsa_c |
| irc_0 | irc_0 |
| 0543  | 0156  |
| 40    | 83    |
| hsa_c | hsa_c |
| irc_0 | irc_0 |
| 0543  | 0156  |
| 41    | 84    |
| hsa_c | hsa_c |
| irc_0 | irc_0 |
| 0544  | 0158  |
| 36    | 15    |
| hsa_c | hsa_c |
| irc_0 | irc_0 |
| 0545  | 0158  |
| 37    | 14    |
| hsa_c | hsa_c |
| irc_0 | irc_0 |
| 0545  | 0159  |
| 38    | 46    |
| hsa_c | hsa_c |
| irc_0 | irc_0 |
| 0545  | 0159  |
| 52    | 95    |
| hsa_c | hsa_c |
| irc_0 | irc_0 |
| 0547  | 0160  |
| 21    | 37    |
| hsa_c | hsa_c |
| irc_0 | irc_0 |
| 0547  | 0160  |
| 22    | 55    |
| hsa_c | hsa_c |
| irc_0 | irc_0 |
| 0547  | 0160  |
| 26    | 54    |
| hsa_c | hsa_c |
| irc_0 | irc_0 |
| 0547  | 0160  |

|       |       |
|-------|-------|
| 28    | 58    |
| hsa_c | hsa_c |
| irc_0 | irc_0 |
| 0547  | 0160  |
| 31    | 56    |
| hsa_c | hsa_c |
| irc_0 | irc_0 |
| 0547  | 0161  |
| 34    | 06    |
| hsa_c | hsa_c |
| irc_0 | irc_0 |
| 0547  | 0161  |
| 35    | 07    |
| hsa_c | hsa_c |
| irc_0 | irc_0 |
| 0547  | 0161  |
| 36    | 08    |
| hsa_c | hsa_c |
| irc_0 | irc_0 |
| 0547  | 0076  |
| 37    | 84    |
| hsa_c | hsa_c |
| irc_0 | irc_0 |
| 0547  | 0161  |
| 41    | 26    |
| hsa_c | hsa_c |
| irc_0 | irc_0 |
| 0023  | 0161  |
| 70    | 27    |
| hsa_c | hsa_c |
| irc_0 | irc_0 |
| 0067  | 0161  |
| 59    | 54    |
| hsa_c | hsa_c |
| irc_0 | irc_0 |
| 0549  | 0161  |
| 24    | 55    |
| hsa_c | hsa_c |
| irc_0 | irc_0 |
| 0549  | 0161  |
| 44    | 46    |
| hsa_c | hsa_c |
| irc_0 | irc_0 |
| 0549  | 0007  |
| 49    | 9     |
| hsa_c | hsa_c |
| irc_0 | irc_0 |
| 0549  | 0161  |
| 50    | 56    |
| hsa_c | hsa_c |
| irc_0 | irc_0 |
| 0549  | 0161  |
| 51    | 60    |
| hsa_c | hsa_c |

|       |       |
|-------|-------|
| irc_0 | irc_0 |
| 0052  | 0161  |
| 66    | 62    |
| hsa_c | hsa_c |
| irc_0 | irc_0 |
| 0038  | 0161  |
| 08    | 64    |
| hsa_c | hsa_c |
| irc_0 | irc_0 |
| 0550  | 0161  |
| 39    | 65    |
| hsa_c | hsa_c |
| irc_0 | irc_0 |
| 0550  | 0161  |
| 40    | 66    |
| hsa_c | hsa_c |
| irc_0 | irc_0 |
| 0550  | 0161  |
| 45    | 67    |
| hsa_c | hsa_c |
| irc_0 | irc_0 |
| 0550  | 0162  |
| 46    | 08    |
| hsa_c | hsa_c |
| irc_0 | irc_0 |
| 0550  | 0162  |
| 47    | 30    |
| hsa_c | hsa_c |
| irc_0 | irc_0 |
| 0550  | 0162  |
| 48    | 38    |
| hsa_c | hsa_c |
| irc_0 | irc_0 |
| 0550  | 0162  |
| 49    | 41    |
| hsa_c | hsa_c |
| irc_0 | irc_0 |
| 0550  | 0162  |
| 50    | 40    |
| hsa_c | hsa_c |
| irc_0 | irc_0 |
| 0550  | 0162  |
| 52    | 37    |
| hsa_c | hsa_c |
| irc_0 | irc_0 |
| 0550  | 0162  |
| 69    | 75    |
| hsa_c | hsa_c |
| irc_0 | irc_0 |
| 0550  | 0162  |
| 70    | 76    |
| hsa_c | hsa_c |
| irc_0 | irc_0 |
| 0550  | 0162  |
| 71    | 77    |

|       |       |
|-------|-------|
| hsa_c | hsa_c |
| irc_0 | irc_0 |
| 0550  | 0162  |
| 72    | 74    |
| hsa_c | hsa_c |
| irc_0 | irc_0 |
| 0551  | 0162  |
| 01    | 79    |
| hsa_c | hsa_c |
| irc_0 | irc_0 |
| 0551  | 0162  |
| 47    | 80    |
| hsa_c | hsa_c |
| irc_0 | irc_0 |
| 0552  | 0162  |
| 30    | 81    |
| hsa_c | hsa_c |
| irc_0 | irc_0 |
| 0552  | 0162  |
| 31    | 82    |
| hsa_c | hsa_c |
| irc_0 | irc_0 |
| 0552  | 0162  |
| 34    | 78    |
| hsa_c | hsa_c |
| irc_0 | irc_0 |
| 0552  | 0163  |
| 36    | 10    |
| hsa_c | hsa_c |
| irc_0 | irc_0 |
| 0552  | 0163  |
| 37    | 39    |
| hsa_c | hsa_c |
| irc_0 | irc_0 |
| 0552  | 0163  |
| 38    | 42    |
| hsa_c | hsa_c |
| irc_0 | irc_0 |
| 0552  | 0163  |
| 40    | 38    |
| hsa_c | hsa_c |
| irc_0 | irc_0 |
| 0552  | 0163  |
| 51    | 76    |
| hsa_c | hsa_c |
| irc_0 | irc_0 |
| 0032  | 0163  |
| 43    | 89    |
| hsa_c | hsa_c |
| irc_0 | irc_0 |
| 0552  | 0076  |
| 68    | 55    |
| hsa_c | hsa_c |
| irc_0 | irc_0 |
| 0552  | 0164  |

|       |       |
|-------|-------|
| 70    | 40    |
| hsa_c | hsa_c |
| irc_0 | irc_0 |
| 0552  | 0165  |
| 71    | 37    |
| hsa_c | hsa_c |
| irc_0 | irc_0 |
| 0552  | 0165  |
| 72    | 34    |
| hsa_c | hsa_c |
| irc_0 | irc_0 |
| 0554  | 0031  |
| 14    | 63    |
| hsa_c | hsa_c |
| irc_0 | irc_0 |
| 0554  | 0165  |
| 23    | 43    |
| hsa_c | hsa_c |
| irc_0 | irc_0 |
| 0554  | 0165  |
| 25    | 85    |
| hsa_c | hsa_c |
| irc_0 | irc_0 |
| 0071  | 0165  |
| 91    | 84    |
| hsa_c | hsa_c |
| irc_0 | irc_0 |
| 0074  | 0166  |
| 90    | 37    |
| hsa_c | hsa_c |
| irc_0 | irc_0 |
| 0554  | 0166  |
| 76    | 38    |
| hsa_c | hsa_c |
| irc_0 | irc_0 |
| 0554  | 0166  |
| 82    | 39    |
| hsa_c | hsa_c |
| irc_0 | irc_0 |
| 0554  | 0166  |
| 83    | 40    |
| hsa_c | hsa_c |
| irc_0 | irc_0 |
| 0554  | 0166  |
| 86    | 41    |
| hsa_c | hsa_c |
| irc_0 | irc_0 |
| 0554  | 0166  |
| 89    | 42    |
| hsa_c | hsa_c |
| irc_0 | irc_0 |
| 0554  | 0166  |
| 90    | 43    |
| hsa_c | hsa_c |

|       |       |
|-------|-------|
| irc_0 | irc_0 |
| 0554  | 0166  |
| 91    | 57    |
| hsa_c | hsa_c |
| irc_0 | irc_0 |
| 0554  | 0166  |
| 92    | 56    |
| hsa_c | hsa_c |
| irc_0 | irc_0 |
| 0555  | 0166  |
| 25    | 70    |
| hsa_c | hsa_c |
| irc_0 | irc_0 |
| 0555  | 0166  |
| 32    | 71    |
| hsa_c | hsa_c |
| irc_0 | irc_0 |
| 0555  | 0166  |
| 33    | 72    |
| hsa_c | hsa_c |
| irc_0 | irc_0 |
| 0555  | 0166  |
| 34    | 73    |
| hsa_c | hsa_c |
| irc_0 | irc_0 |
| 0555  | 0166  |
| 50    | 74    |
| hsa_c | hsa_c |
| irc_0 | irc_0 |
| 0556  | 0166  |
| 26    | 75    |
| hsa_c | hsa_c |
| irc_0 | irc_0 |
| 0556  | 0166  |
| 33    | 76    |
| hsa_c | hsa_c |
| irc_0 | irc_0 |
| 0556  | 0167  |
| 34    | 57    |
| hsa_c | hsa_c |
| irc_0 | irc_0 |
| 0556  | 0167  |
| 35    | 71    |
| hsa_c | hsa_c |
| irc_0 | irc_0 |
| 0556  | 0168  |
| 36    | 31    |
| hsa_c | hsa_c |
| irc_0 | irc_0 |
| 0556  | 0168  |
| 38    | 33    |
| hsa_c | hsa_c |
| irc_0 | irc_0 |
| 0556  | 0168  |
| 39    | 32    |

|       |       |
|-------|-------|
| hsa_c | hsa_c |
| irc_0 | irc_0 |
| 0556  | 0169  |
| 40    | 15    |
| hsa_c | hsa_c |
| irc_0 | irc_0 |
| 0556  | 0169  |
| 41    | 16    |
| hsa_c | hsa_c |
| irc_0 | irc_0 |
| 0556  | 0169  |
| 42    | 17    |
| hsa_c | hsa_c |
| irc_0 | irc_0 |
| 0556  | 0169  |
| 43    | 22    |
| hsa_c | hsa_c |
| irc_0 | irc_0 |
| 0558  | 0169  |
| 01    | 26    |
| hsa_c | hsa_c |
| irc_0 | irc_0 |
| 0041  | 0169  |
| 47    | 35    |
| hsa_c | hsa_c |
| irc_0 | irc_0 |
| 0558  | 0169  |
| 13    | 36    |
| hsa_c | hsa_c |
| irc_0 | irc_0 |
| 0558  | 0169  |
| 17    | 49    |
| hsa_c | hsa_c |
| irc_0 | irc_0 |
| 0558  | 0169  |
| 23    | 63    |
| hsa_c | hsa_c |
| irc_0 | irc_0 |
| 0558  | 0169  |
| 24    | 72    |
| hsa_c | hsa_c |
| irc_0 | irc_0 |
| 0558  | 0169  |
| 26    | 77    |
| hsa_c | hsa_c |
| irc_0 | irc_0 |
| 0558  | 0169  |
| 27    | 82    |
| hsa_c | hsa_c |
| irc_0 | irc_0 |
| 0558  | 0169  |
| 29    | 83    |
| hsa_c | hsa_c |
| irc_0 | irc_0 |
| 0558  | 0039  |

|       |       |
|-------|-------|
| 30    | 29    |
| hsa_c | hsa_c |
| irc_0 | irc_0 |
| 0558  | 0171  |
| 32    | 40    |
| hsa_c | hsa_c |
| irc_0 | irc_0 |
| 0558  | 0171  |
| 33    | 41    |
| hsa_c | hsa_c |
| irc_0 | irc_0 |
| 0558  | 0171  |
| 35    | 42    |
| hsa_c | hsa_c |
| irc_0 | irc_0 |
| 0558  | 0171  |
| 37    | 43    |
| hsa_c | hsa_c |
| irc_0 | irc_0 |
| 0110  | 0171  |
| 9     | 46    |
| hsa_c | hsa_c |
| irc_0 | irc_0 |
| 0558  | 0171  |
| 56    | 52    |
| hsa_c | hsa_c |
| irc_0 | irc_0 |
| 0558  | 0171  |
| 57    | 53    |
| hsa_c | hsa_c |
| irc_0 | irc_0 |
| 0559  | 0171  |
| 12    | 54    |
| hsa_c | hsa_c |
| irc_0 | irc_0 |
| 0071  | 0171  |
| 97    | 57    |
| hsa_c | hsa_c |
| irc_0 | irc_0 |
| 0035  | 0171  |
| 81    | 77    |
| hsa_c | hsa_c |
| irc_0 | irc_0 |
| 0077  | 0028  |
| 02    | 02    |
| hsa_c | hsa_c |
| irc_0 | irc_0 |
| 0029  | 0524  |
| 37    | 37    |
| hsa_c | hsa_c |
| irc_0 | irc_0 |
| 0033  | 0524  |
| 82    | 38    |
| hsa_c | hsa_c |



|       |       |
|-------|-------|
| irc_0 | irc_0 |
| 0049  | 0524  |
| 23    | 39    |
| hsa_c | hsa_c |
| irc_0 | irc_0 |
| 0043  | 0524  |
| 60    | 40    |
| hsa_c | hsa_c |
| irc_0 | irc_0 |
| 0073  | 0524  |
| 73    | 41    |
| hsa_c | hsa_c |
| irc_0 | irc_0 |
| 0030  | 0524  |
| 72    | 42    |
| hsa_c | hsa_c |
| irc_0 | irc_0 |
| 0048  | 0524  |
| 48    | 43    |
| hsa_c | hsa_c |
| irc_0 | irc_0 |
| 0071  | 0524  |
| 33    | 63    |
| hsa_c | hsa_c |
| irc_0 | irc_0 |
| 0085  | 0524  |
| 70    | 64    |
| hsa_c | hsa_c |
| irc_0 | irc_0 |
| 0560  | 0524  |
| 45    | 65    |
| hsa_c | hsa_c |
| irc_0 | irc_0 |
| 0561  | 0524  |
| 24    | 66    |
| hsa_c | hsa_c |
| irc_0 | irc_0 |
| 0561  | 0524  |
| 42    | 67    |
| hsa_c | hsa_c |
| irc_0 | irc_0 |
| 0087  | 0068  |
| 12    | 9     |
| hsa_c | hsa_c |
| irc_0 | irc_0 |
| 0561  | 0525  |
| 90    | 84    |
| hsa_c | hsa_c |
| irc_0 | irc_0 |
| 0561  | 0525  |
| 91    | 86    |
| hsa_c | hsa_c |
| irc_0 | irc_0 |
| 0561  | 0525  |

|       |       |
|-------|-------|
| 94    | 87    |
| hsa_c | hsa_c |
| irc_0 | irc_0 |
| 0561  | 0525  |
| 95    | 88    |
| hsa_c | hsa_c |
| irc_0 | irc_0 |
| 0561  | 0528  |
| 96    | 82    |
| hsa_c | hsa_c |
| irc_0 | irc_0 |
| 0561  | 0528  |
| 98    | 83    |
| hsa_c | hsa_c |
| irc_0 | irc_0 |
| 0561  | 0528  |
| 99    | 84    |
| hsa_c | hsa_c |
| irc_0 | irc_0 |
| 0562  | 0528  |
| 03    | 85    |
| hsa_c | hsa_c |
| irc_0 | irc_0 |
| 0562  | 0528  |
| 04    | 90    |
| hsa_c | hsa_c |
| irc_0 | irc_0 |
| 0562  | 0528  |
| 06    | 91    |
| hsa_c | hsa_c |
| irc_0 | irc_0 |
| 0562  | 0528  |
| 08    | 86    |
| hsa_c | hsa_c |
| irc_0 | irc_0 |
| 0562  | 0528  |
| 09    | 87    |
| hsa_c | hsa_c |
| irc_0 | irc_0 |
| 0562  | 0528  |
| 92    | 88    |
| hsa_c | hsa_c |
| irc_0 | irc_0 |
| 0562  | 0528  |
| 91    | 89    |
| hsa_c | hsa_c |
| irc_0 | irc_0 |
| 0562  | 0529  |
| 93    | 33    |
| hsa_c | hsa_c |
| irc_0 | irc_0 |
| 0562  | 0529  |
| 94    | 34    |
| hsa_c | hsa_c |

|       |       |
|-------|-------|
| irc_0 | irc_0 |
| 0562  | 0529  |
| 95    | 35    |
| hsa_c | hsa_c |
| irc_0 | irc_0 |
| 0563  | 0529  |
| 64    | 36    |
| hsa_c | hsa_c |
| irc_0 | irc_0 |
| 0564  | 0529  |
| 76    | 37    |
| hsa_c | hsa_c |
| irc_0 | irc_0 |
| 0564  | 0529  |
| 77    | 38    |
| hsa_c | hsa_c |
| irc_0 | irc_0 |
| 0564  | 0529  |
| 78    | 39    |
| hsa_c | hsa_c |
| irc_0 | irc_0 |
| 0564  | 0529  |
| 79    | 40    |
| hsa_c | hsa_c |
| irc_0 | irc_0 |
| 0564  | 0529  |
| 80    | 41    |
| hsa_c | hsa_c |
| irc_0 | irc_0 |
| 0565  | 0529  |
| 09    | 42    |
| hsa_c | hsa_c |
| irc_0 | irc_0 |
| 0565  | 0529  |
| 10    | 74    |
| hsa_c | hsa_c |
| irc_0 | irc_0 |
| 0565  | 0529  |
| 25    | 75    |
| hsa_c | hsa_c |
| irc_0 | irc_0 |
| 0565  | 0529  |
| 27    | 79    |
| hsa_c | hsa_c |
| irc_0 | irc_0 |
| 0565  | 0529  |
| 29    | 80    |
| hsa_c | hsa_c |
| irc_0 | irc_0 |
| 0565  | 0529  |
| 30    | 81    |
| hsa_c | hsa_c |
| irc_0 | irc_0 |
| 0565  | 0529  |
| 31    | 82    |

|       |       |
|-------|-------|
| hsa_c | hsa_c |
| irc_0 | irc_0 |
| 0565  | 0530  |
| 32    | 04    |
| hsa_c | hsa_c |
| irc_0 | irc_0 |
| 0565  | 0530  |
| 33    | 07    |
| hsa_c | hsa_c |
| irc_0 | irc_0 |
| 0565  | 0530  |
| 34    | 09    |
| hsa_c | hsa_c |
| irc_0 | irc_0 |
| 0080  | 0530  |
| 36    | 34    |
| hsa_c | hsa_c |
| irc_0 | irc_0 |
| 0565  | 0530  |
| 45    | 35    |
| hsa_c | hsa_c |
| irc_0 | irc_0 |
| 0565  | 0530  |
| 49    | 36    |
| hsa_c | hsa_c |
| irc_0 | irc_0 |
| 0565  | 0530  |
| 51    | 37    |
| hsa_c | hsa_c |
| irc_0 | irc_0 |
| 0565  | 0530  |
| 52    | 38    |
| hsa_c | hsa_c |
| irc_0 | irc_0 |
| 0565  | 0530  |
| 66    | 93    |
| hsa_c | hsa_c |
| irc_0 | irc_0 |
| 0565  | 0531  |
| 83    | 37    |
| hsa_c | hsa_c |
| irc_0 | irc_0 |
| 0565  | 0531  |
| 84    | 44    |
| hsa_c | hsa_c |
| irc_0 | irc_0 |
| 0565  | 0531  |
| 87    | 45    |
| hsa_c | hsa_c |
| irc_0 | irc_0 |
| 0566  | 0531  |
| 15    | 46    |
| hsa_c | hsa_c |
| irc_0 | irc_0 |
| 0566  | 0532  |

|       |       |
|-------|-------|
| 65    | 61    |
| hsa_c | hsa_c |
| irc_0 | irc_0 |
| 0567  | 0532  |
| 30    | 63    |
| hsa_c | hsa_c |
| irc_0 | irc_0 |
| 0567  | 0532  |
| 39    | 80    |
| hsa_c | hsa_c |
| irc_0 | irc_0 |
| 0567  | 0532  |
| 42    | 83    |
| hsa_c | hsa_c |
| irc_0 | irc_0 |
| 0567  | 0043  |
| 69    | 37    |
| hsa_c | hsa_c |
| irc_0 | irc_0 |
| 0568  | 0533  |
| 02    | 75    |
| hsa_c | hsa_c |
| irc_0 | irc_0 |
| 0569  | 0533  |
| 00    | 76    |
| hsa_c | hsa_c |
| irc_0 | irc_0 |
| 0569  | 0207  |
| 01    | 5     |
| hsa_c | hsa_c |
| irc_0 | irc_0 |
| 0569  | 0534  |
| 25    | 34    |
| hsa_c | hsa_c |
| irc_0 | irc_0 |
| 0075  | 0534  |
| 29    | 35    |
| hsa_c | hsa_c |
| irc_0 | irc_0 |
| 0570  | 0534  |
| 58    | 36    |
| hsa_c | hsa_c |
| irc_0 | irc_0 |
| 0570  | 0534  |
| 65    | 37    |
| hsa_c | hsa_c |
| irc_0 | irc_0 |
| 0570  | 0534  |
| 66    | 38    |
| hsa_c | hsa_c |
| irc_0 | irc_0 |
| 0570  | 0534  |
| 67    | 44    |
| hsa_c | hsa_c |

|       |       |
|-------|-------|
| irc_0 | irc_0 |
| 0571  | 0534  |
| 24    | 45    |
| hsa_c | hsa_c |
| irc_0 | irc_0 |
| 0571  | 0534  |
| 69    | 46    |
| hsa_c | hsa_c |
| irc_0 | irc_0 |
| 0572  | 0534  |
| 13    | 39    |
| hsa_c | hsa_c |
| irc_0 | irc_0 |
| 0572  | 0534  |
| 58    | 40    |
| hsa_c | hsa_c |
| irc_0 | irc_0 |
| 0572  | 0534  |
| 59    | 41    |
| hsa_c | hsa_c |
| irc_0 | irc_0 |
| 0572  | 0534  |
| 60    | 42    |
| hsa_c | hsa_c |
| irc_0 | irc_0 |
| 0572  | 0534  |
| 61    | 43    |
| hsa_c | hsa_c |
| irc_0 | irc_0 |
| 0572  | 0128  |
| 62    | 7     |
| hsa_c | hsa_c |
| irc_0 | irc_0 |
| 0572  | 0041  |
| 63    | 82    |
| hsa_c | hsa_c |
| irc_0 | irc_0 |
| 0573  | 0043  |
| 34    | 36    |
| hsa_c | hsa_c |
| irc_0 | irc_0 |
| 0573  | 0079  |
| 35    | 72    |
| hsa_c | hsa_c |
| irc_0 | irc_0 |
| 0574  | 0055  |
| 97    | 07    |
| hsa_c | hsa_c |
| irc_0 | irc_0 |
| 0575  | 0062  |
| 07    | 94    |
| hsa_c | hsa_c |
| irc_0 | irc_0 |
| 0575  | 0063  |
| 08    | 30    |

|       |       |
|-------|-------|
| hsa_c | hsa_c |
| irc_0 | irc_0 |
| 0575  | 0079  |
| 09    | 71    |
| hsa_c | hsa_c |
| irc_0 | irc_0 |
| 0575  | 0540  |
| 11    | 25    |
| hsa_c | hsa_c |
| irc_0 | irc_0 |
| 0575  | 0064  |
| 12    | 44    |
| hsa_c | hsa_c |
| irc_0 | irc_0 |
| 0575  | 0541  |
| 13    | 67    |
| hsa_c | hsa_c |
| irc_0 | irc_0 |
| 0575  | 0541  |
| 14    | 81    |
| hsa_c | hsa_c |
| irc_0 | irc_0 |
| 0575  | 0541  |
| 15    | 82    |
| hsa_c | hsa_c |
| irc_0 | irc_0 |
| 0575  | 0544  |
| 39    | 36    |
| hsa_c | hsa_c |
| irc_0 | irc_0 |
| 0575  | 0544  |
| 48    | 73    |
| hsa_c | hsa_c |
| irc_0 | irc_0 |
| 0575  | 0544  |
| 52    | 75    |
| hsa_c | hsa_c |
| irc_0 | irc_0 |
| 0575  | 0544  |
| 53    | 77    |
| hsa_c | hsa_c |
| irc_0 | irc_0 |
| 0575  | 0544  |
| 54    | 78    |
| hsa_c | hsa_c |
| irc_0 | irc_0 |
| 0575  | 0545  |
| 55    | 37    |
| hsa_c | hsa_c |
| irc_0 | irc_0 |
| 0575  | 0545  |
| 56    | 48    |
| hsa_c | hsa_c |
| irc_0 | irc_0 |
| 0575  | 0545  |

|       |       |
|-------|-------|
| 57    | 53    |
| hsa_c | hsa_c |
| irc_0 | irc_0 |
| 0575  | 0545  |
| 58    | 54    |
| hsa_c | hsa_c |
| irc_0 | irc_0 |
| 0575  | 0031  |
| 59    | 65    |
| hsa_c | hsa_c |
| irc_0 | irc_0 |
| 0576  | 0546  |
| 58    | 69    |
| hsa_c | hsa_c |
| irc_0 | irc_0 |
| 0576  | 0546  |
| 59    | 71    |
| hsa_c | hsa_c |
| irc_0 | irc_0 |
| 0576  | 0546  |
| 60    | 74    |
| hsa_c | hsa_c |
| irc_0 | irc_0 |
| 0576  | 0546  |
| 61    | 75    |
| hsa_c | hsa_c |
| irc_0 | irc_0 |
| 0576  | 0546  |
| 62    | 76    |
| hsa_c | hsa_c |
| irc_0 | irc_0 |
| 0576  | 0546  |
| 63    | 77    |
| hsa_c | hsa_c |
| irc_0 | irc_0 |
| 0576  | 0176  |
| 64    | 6     |
| hsa_c | hsa_c |
| irc_0 | irc_0 |
| 0576  | 0085  |
| 65    | 34    |
| hsa_c | hsa_c |
| irc_0 | irc_0 |
| 0576  | 0546  |
| 66    | 99    |
| hsa_c | hsa_c |
| irc_0 | irc_0 |
| 0576  | 0547  |
| 94    | 00    |
| hsa_c | hsa_c |
| irc_0 | irc_0 |
| 0577  | 0068  |
| 23    | 4     |
| hsa_c | hsa_c |



|       |       |
|-------|-------|
| irc_0 | irc_0 |
| 0577  | 0023  |
| 54    | 70    |
| hsa_c | hsa_c |
| irc_0 | irc_0 |
| 0577  | 0067  |
| 55    | 59    |
| hsa_c | hsa_c |
| irc_0 | irc_0 |
| 0577  | 0549  |
| 56    | 24    |
| hsa_c | hsa_c |
| irc_0 | irc_0 |
| 0578  | 0549  |
| 97    | 44    |
| hsa_c | hsa_c |
| irc_0 | irc_0 |
| 0578  | 0549  |
| 98    | 51    |
| hsa_c | hsa_c |
| irc_0 | irc_0 |
| 0578  | 0549  |
| 99    | 55    |
| hsa_c | hsa_c |
| irc_0 | irc_0 |
| 0579  | 0549  |
| 00    | 56    |
| hsa_c | hsa_c |
| irc_0 | irc_0 |
| 0579  | 0549  |
| 55    | 57    |
| hsa_c | hsa_c |
| irc_0 | irc_0 |
| 0579  | 0549  |
| 64    | 58    |
| hsa_c | hsa_c |
| irc_0 | irc_0 |
| 0579  | 0549  |
| 65    | 59    |
| hsa_c | hsa_c |
| irc_0 | irc_0 |
| 0579  | 0549  |
| 66    | 60    |
| hsa_c | hsa_c |
| irc_0 | irc_0 |
| 0002  | 0549  |
| 3     | 64    |
| hsa_c | hsa_c |
| irc_0 | irc_0 |
| 0579  | 0549  |
| 78    | 65    |
| hsa_c | hsa_c |
| irc_0 | irc_0 |
| 0579  | 0550  |
| 79    | 69    |

|       |       |
|-------|-------|
| hsa_c | hsa_c |
| irc_0 | irc_0 |
| 0579  | 0550  |
| 81    | 70    |
| hsa_c | hsa_c |
| irc_0 | irc_0 |
| 0579  | 0550  |
| 82    | 71    |
| hsa_c | hsa_c |
| irc_0 | irc_0 |
| 0579  | 0550  |
| 84    | 72    |
| hsa_c | hsa_c |
| irc_0 | irc_0 |
| 0580  | 0551  |
| 88    | 01    |
| hsa_c | hsa_c |
| irc_0 | irc_0 |
| 0580  | 0551  |
| 89    | 14    |
| hsa_c | hsa_c |
| irc_0 | irc_0 |
| 0580  | 0551  |
| 90    | 36    |
| hsa_c | hsa_c |
| irc_0 | irc_0 |
| 0581  | 0551  |
| 96    | 37    |
| hsa_c | hsa_c |
| irc_0 | irc_0 |
| 0581  | 0551  |
| 97    | 38    |
| hsa_c | hsa_c |
| irc_0 | irc_0 |
| 0582  | 0551  |
| 19    | 39    |
| hsa_c | hsa_c |
| irc_0 | irc_0 |
| 0582  | 0551  |
| 20    | 40    |
| hsa_c | hsa_c |
| irc_0 | irc_0 |
| 0583  | 0551  |
| 98    | 41    |
| hsa_c | hsa_c |
| irc_0 | irc_0 |
| 0583  | 0552  |
| 99    | 07    |
| hsa_c | hsa_c |
| irc_0 | irc_0 |
| 0584  | 0552  |
| 00    | 30    |
| hsa_c | hsa_c |
| irc_0 | irc_0 |

|       |       |
|-------|-------|
| 0584  | 0552  |
| 01    | 31    |
| hsa_c | hsa_c |
| irc_0 | irc_0 |
| 0048  | 0552  |
| 21    | 34    |
| hsa_c | hsa_c |
| irc_0 | irc_0 |
| 0584  | 0552  |
| 43    | 36    |
| hsa_c | hsa_c |
| irc_0 | irc_0 |
| 0584  | 0552  |
| 44    | 37    |
| hsa_c | hsa_c |
| irc_0 | irc_0 |
| 0584  | 0552  |
| 45    | 38    |
| hsa_c | hsa_c |
| irc_0 | irc_0 |
| 0584  | 0552  |
| 46    | 40    |
| hsa_c | hsa_c |
| irc_0 | irc_0 |
| 0584  | 0112  |
| 47    | 6     |
| hsa_c | hsa_c |
| irc_0 | irc_0 |
| 0584  | 0552  |
| 48    | 49    |
| hsa_c | hsa_c |
| irc_0 | irc_0 |
| 0584  | 0552  |
| 49    | 50    |
| hsa_c | hsa_c |
| irc_0 | irc_0 |
| 0584  | 0552  |
| 50    | 55    |
| hsa_c | hsa_c |
| irc_0 | irc_0 |
| 0584  | 0552  |
| 57    | 56    |
| hsa_c | hsa_c |
| irc_0 | irc_0 |
| 0041  | 0552  |
| 53    | 57    |
| hsa_c | hsa_c |
| irc_0 | irc_0 |
| 0216  | 0552  |
| 2     | 58    |
| hsa_c | hsa_c |
| irc_0 | irc_0 |
| 0111  | 0552  |
| 8     | 59    |

|       |       |
|-------|-------|
| hsa_c | hsa_c |
| irc_0 | irc_0 |
| 0586  | 0552  |
| 65    | 60    |
| hsa_c | hsa_c |
| irc_0 | irc_0 |
| 0586  | 0552  |
| 66    | 61    |
| hsa_c | hsa_c |
| irc_0 | irc_0 |
| 0586  | 0552  |
| 67    | 64    |
| hsa_c | hsa_c |
| irc_0 | irc_0 |
| 0587  | 0552  |
| 13    | 65    |
| hsa_c | hsa_c |
| irc_0 | irc_0 |
| 0587  | 0032  |
| 22    | 43    |
| hsa_c | hsa_c |
| irc_0 | irc_0 |
| 0587  | 0552  |
| 61    | 68    |
| hsa_c | hsa_c |
| irc_0 | irc_0 |
| 0587  | 0552  |
| 78    | 70    |
| hsa_c | hsa_c |
| irc_0 | irc_0 |
| 0587  | 0552  |
| 79    | 71    |
| hsa_c | hsa_c |
| irc_0 | irc_0 |
| 0587  | 0552  |
| 80    | 72    |
| hsa_c | hsa_c |
| irc_0 | irc_0 |
| 0588  | 0552  |
| 15    | 89    |
| hsa_c | hsa_c |
| irc_0 | irc_0 |
| 0590  | 0552  |
| 63    | 91    |
| hsa_c | hsa_c |
| irc_0 | irc_0 |
| 0590  | 0553  |
| 65    | 35    |
| hsa_c | hsa_c |
| irc_0 | irc_0 |
| 0590  | 0553  |
| 66    | 32    |
| hsa_c | hsa_c |
| irc_0 | irc_0 |
| 0591  | 0044  |

|       |       |
|-------|-------|
| 07    | 20    |
| hsa_c | hsa_c |
| irc_0 | irc_0 |
| 0640  | 0554  |
| 24    | 22    |
| hsa_c | hsa_c |
| irc_0 | irc_0 |
| 0640  | 0554  |
| 25    | 23    |
| hsa_c | hsa_c |
| irc_0 | irc_0 |
| 0640  | 0554  |
| 26    | 21    |
| hsa_c | hsa_c |
| irc_0 | irc_0 |
| 0024  | 0554  |
| 53    | 38    |
| hsa_c | hsa_c |
| irc_0 | irc_0 |
| 0640  | 0555  |
| 98    | 50    |
| hsa_c | hsa_c |
| irc_0 | irc_0 |
| 0641  | 0556  |
| 00    | 25    |
| hsa_c | hsa_c |
| irc_0 | irc_0 |
| 0641  | 0556  |
| 01    | 33    |
| hsa_c | hsa_c |
| irc_0 | irc_0 |
| 0151  | 0556  |
| 7     | 34    |
| hsa_c | hsa_c |
| irc_0 | irc_0 |
| 0058  | 0556  |
| 67    | 35    |
| hsa_c | hsa_c |
| irc_0 | irc_0 |
| 0641  | 0556  |
| 93    | 36    |
| hsa_c | hsa_c |
| irc_0 | irc_0 |
| 0641  | 0556  |
| 96    | 37    |
| hsa_c | hsa_c |
| irc_0 | irc_0 |
| 0641  | 0556  |
| 97    | 38    |
| hsa_c | hsa_c |
| irc_0 | irc_0 |
| 0641  | 0556  |
| 98    | 39    |
| hsa_c | hsa_c |

|       |       |
|-------|-------|
| irc_0 | irc_0 |
| 0642  | 0556  |
| 01    | 43    |
| hsa_c | hsa_c |
| irc_0 | irc_0 |
| 0642  | 0556  |
| 10    | 40    |
| hsa_c | hsa_c |
| irc_0 | irc_0 |
| 0642  | 0556  |
| 12    | 41    |
| hsa_c | hsa_c |
| irc_0 | irc_0 |
| 0642  | 0556  |
| 17    | 42    |
| hsa_c | hsa_c |
| irc_0 | irc_0 |
| 0642  | 0556  |
| 25    | 93    |
| hsa_c | hsa_c |
| irc_0 | irc_0 |
| 0642  | 0557  |
| 27    | 61    |
| hsa_c | hsa_c |
| irc_0 | irc_0 |
| 0642  | 0558  |
| 29    | 21    |
| hsa_c | hsa_c |
| irc_0 | irc_0 |
| 0642  | 0558  |
| 35    | 93    |
| hsa_c | hsa_c |
| irc_0 | irc_0 |
| 0642  | 0558  |
| 36    | 94    |
| hsa_c | hsa_c |
| irc_0 | irc_0 |
| 0642  | 0558  |
| 49    | 95    |
| hsa_c | hsa_c |
| irc_0 | irc_0 |
| 0069  | 0558  |
| 2     | 96    |
| hsa_c | hsa_c |
| irc_0 | irc_0 |
| 0642  | 0558  |
| 71    | 97    |
| hsa_c | hsa_c |
| irc_0 | irc_0 |
| 0642  | 0558  |
| 72    | 98    |
| hsa_c | hsa_c |
| irc_0 | irc_0 |
| 0643  | 0558  |
| 35    | 99    |

|       |       |
|-------|-------|
| hsa_c | hsa_c |
| irc_0 | irc_0 |
| 0643  | 0559  |
| 36    | 12    |
| hsa_c | hsa_c |
| irc_0 | irc_0 |
| 0643  | 0559  |
| 37    | 29    |
| hsa_c | hsa_c |
| irc_0 | irc_0 |
| 0643  | 0071  |
| 38    | 97    |
| hsa_c | hsa_c |
| irc_0 | irc_0 |
| 0643  | 0035  |
| 39    | 81    |
| hsa_c | hsa_c |
| irc_0 | irc_0 |
| 0643  | 0077  |
| 57    | 24    |
| hsa_c | hsa_c |
| irc_0 | irc_0 |
| 0643  | 0083  |
| 91    | 64    |
| hsa_c | hsa_c |
| irc_0 | irc_0 |
| 0643  | 0090  |
| 92    | 78    |
| hsa_c | hsa_c |
| irc_0 | irc_0 |
| 0643  | 0559  |
| 94    | 87    |
| hsa_c | hsa_c |
| irc_0 | irc_0 |
| 0643  | 0027  |
| 95    | 28    |
| hsa_c | hsa_c |
| irc_0 | irc_0 |
| 0643  | 0029  |
| 96    | 37    |
| hsa_c | hsa_c |
| irc_0 | irc_0 |
| 0643  | 0049  |
| 97    | 23    |
| hsa_c | hsa_c |
| irc_0 | irc_0 |
| 0643  | 0033  |
| 98    | 82    |
| hsa_c | hsa_c |
| irc_0 | irc_0 |
| 0643  | 0077  |
| 99    | 74    |
| hsa_c | hsa_c |
| irc_0 | irc_0 |
| 0644  | 0560  |

|       |       |
|-------|-------|
| 00    | 06    |
| hsa_c | hsa_c |
| irc_0 | irc_0 |
| 0644  | 0073  |
| 87    | 73    |
| hsa_c | hsa_c |
| irc_0 | irc_0 |
| 0644  | 0043  |
| 88    | 60    |
| hsa_c | hsa_c |
| irc_0 | irc_0 |
| 0644  | 0030  |
| 89    | 72    |
| hsa_c | hsa_c |
| irc_0 | irc_0 |
| 0644  | 0071  |
| 98    | 33    |
| hsa_c | hsa_c |
| irc_0 | irc_0 |
| 0645  | 0085  |
| 41    | 70    |
| hsa_c | hsa_c |
| irc_0 | irc_0 |
| 0645  | 0048  |
| 42    | 48    |
| hsa_c | hsa_c |
| irc_0 | irc_0 |
| 0645  | 0560  |
| 89    | 44    |
| hsa_c | hsa_c |
| irc_0 | irc_0 |
| 0645  | 0561  |
| 90    | 35    |
| hsa_c | hsa_c |
| irc_0 | irc_0 |
| 0645  | 0561  |
| 91    | 36    |
| hsa_c | hsa_c |
| irc_0 | irc_0 |
| 0645  | 0561  |
| 92    | 38    |
| hsa_c | hsa_c |
| irc_0 | irc_0 |
| 0646  | 0561  |
| 00    | 39    |
| hsa_c | hsa_c |
| irc_0 | irc_0 |
| 0646  | 0561  |
| 01    | 40    |
| hsa_c | hsa_c |
| irc_0 | irc_0 |
| 0646  | 0040  |
| 27    | 12    |
| hsa_c | hsa_c |



|       |       |
|-------|-------|
| irc_0 | irc_0 |
| 0646  | 0561  |
| 59    | 44    |
| hsa_c | hsa_c |
| irc_0 | irc_0 |
| 0646  | 0561  |
| 60    | 45    |
| hsa_c | hsa_c |
| irc_0 | irc_0 |
| 0646  | 0561  |
| 61    | 42    |
| hsa_c | hsa_c |
| irc_0 | irc_0 |
| 0646  | 0561  |
| 62    | 53    |
| hsa_c | hsa_c |
| irc_0 | irc_0 |
| 0646  | 0561  |
| 73    | 55    |
| hsa_c | hsa_c |
| irc_0 | irc_0 |
| 0647  | 0561  |
| 03    | 51    |
| hsa_c | hsa_c |
| irc_0 | irc_0 |
| 0647  | 0562  |
| 04    | 22    |
| hsa_c | hsa_c |
| irc_0 | irc_0 |
| 0647  | 0562  |
| 05    | 23    |
| hsa_c | hsa_c |
| irc_0 | irc_0 |
| 0647  | 0562  |
| 07    | 24    |
| hsa_c | hsa_c |
| irc_0 | irc_0 |
| 0647  | 0562  |
| 08    | 21    |
| hsa_c | hsa_c |
| irc_0 | irc_0 |
| 0647  | 0562  |
| 09    | 32    |
| hsa_c | hsa_c |
| irc_0 | irc_0 |
| 0647  | 0562  |
| 11    | 34    |
| hsa_c | hsa_c |
| irc_0 | irc_0 |
| 0647  | 0562  |
| 12    | 42    |
| hsa_c | hsa_c |
| irc_0 | irc_0 |
| 0647  | 0562  |
| 13    | 36    |

|       |       |
|-------|-------|
| hsa_c | hsa_c |
| irc_0 | irc_0 |
| 0647  | 0562  |
| 14    | 37    |
| hsa_c | hsa_c |
| irc_0 | irc_0 |
| 0647  | 0562  |
| 22    | 38    |
| hsa_c | hsa_c |
| irc_0 | irc_0 |
| 0648  | 0562  |
| 17    | 39    |
| hsa_c | hsa_c |
| irc_0 | irc_0 |
| 0648  | 0562  |
| 93    | 40    |
| hsa_c | hsa_c |
| irc_0 | irc_0 |
| 0648  | 0562  |
| 95    | 41    |
| hsa_c | hsa_c |
| irc_0 | irc_0 |
| 0648  | 0075  |
| 96    | 17    |
| hsa_c | hsa_c |
| irc_0 | irc_0 |
| 0648  | 0562  |
| 99    | 86    |
| hsa_c | hsa_c |
| irc_0 | irc_0 |
| 0650  | 0562  |
| 12    | 88    |
| hsa_c | hsa_c |
| irc_0 | irc_0 |
| 0650  | 0563  |
| 63    | 03    |
| hsa_c | hsa_c |
| irc_0 | irc_0 |
| 0650  | 0563  |
| 64    | 63    |
| hsa_c | hsa_c |
| irc_0 | irc_0 |
| 0650  | 0564  |
| 65    | 41    |
| hsa_c | hsa_c |
| irc_0 | irc_0 |
| 0651  | 0564  |
| 04    | 57    |
| hsa_c | hsa_c |
| irc_0 | irc_0 |
| 0651  | 0564  |
| 05    | 58    |
| hsa_c | hsa_c |
| irc_0 | irc_0 |
| 0651  | 0564  |

|       |       |
|-------|-------|
| 06    | 59    |
| hsa_c | hsa_c |
| irc_0 | irc_0 |
| 0651  | 0564  |
| 87    | 56    |
| hsa_c | hsa_c |
| irc_0 | irc_0 |
| 0652  | 0565  |
| 40    | 10    |
| hsa_c | hsa_c |
| irc_0 | irc_0 |
| 0653  | 0565  |
| 85    | 09    |
| hsa_c | hsa_c |
| irc_0 | irc_0 |
| 0653  | 0566  |
| 86    | 22    |
| hsa_c | hsa_c |
| irc_0 | irc_0 |
| 0654  | 0566  |
| 79    | 23    |
| hsa_c | hsa_c |
| irc_0 | irc_0 |
| 0654  | 0566  |
| 81    | 24    |
| hsa_c | hsa_c |
| irc_0 | irc_0 |
| 0654  | 0566  |
| 82    | 25    |
| hsa_c | hsa_c |
| irc_0 | irc_0 |
| 0654  | 0566  |
| 83    | 26    |
| hsa_c | hsa_c |
| irc_0 | irc_0 |
| 0654  | 0566  |
| 84    | 27    |
| hsa_c | hsa_c |
| irc_0 | irc_0 |
| 0654  | 0566  |
| 85    | 28    |
| hsa_c | hsa_c |
| irc_0 | irc_0 |
| 0654  | 0566  |
| 86    | 29    |
| hsa_c | hsa_c |
| irc_0 | irc_0 |
| 0654  | 0566  |
| 99    | 32    |
| hsa_c | hsa_c |
| irc_0 | irc_0 |
| 0655  | 0566  |
| 25    | 30    |
| hsa_c | hsa_c |

|       |       |
|-------|-------|
| irc_0 | irc_0 |
| 0655  | 0566  |
| 26    | 31    |
| hsa_c | hsa_c |
| irc_0 | irc_0 |
| 0655  | 0566  |
| 27    | 90    |
| hsa_c | hsa_c |
| irc_0 | irc_0 |
| 0655  | 0567  |
| 54    | 27    |
| hsa_c | hsa_c |
| irc_0 | irc_0 |
| 0655  | 0567  |
| 55    | 69    |
| hsa_c | hsa_c |
| irc_0 | irc_0 |
| 0025  | 0568  |
| 61    | 62    |
| hsa_c | hsa_c |
| irc_0 | irc_0 |
| 0658  | 0568  |
| 24    | 63    |
| hsa_c | hsa_c |
| irc_0 | irc_0 |
| 0658  | 0568  |
| 27    | 64    |
| hsa_c | hsa_c |
| irc_0 | irc_0 |
| 0658  | 0075  |
| 30    | 29    |
| hsa_c | hsa_c |
| irc_0 | irc_0 |
| 0658  | 0079  |
| 31    | 41    |
| hsa_c | hsa_c |
| irc_0 | irc_0 |
| 0658  | 0571  |
| 32    | 39    |
| hsa_c | hsa_c |
| irc_0 | irc_0 |
| 0658  | 0571  |
| 52    | 40    |
| hsa_c | hsa_c |
| irc_0 | irc_0 |
| 0660  | 0571  |
| 37    | 70    |
| hsa_c | hsa_c |
| irc_0 | irc_0 |
| 0660  | 0043  |
| 38    | 28    |
| hsa_c | hsa_c |
| irc_0 | irc_0 |
| 0660  | 0573  |
| 39    | 08    |

|       |       |
|-------|-------|
| hsa_c | hsa_c |
| irc_0 | irc_0 |
| 0660  | 0573  |
| 40    | 45    |
| hsa_c | hsa_c |
| irc_0 | irc_0 |
| 0662  | 0574  |
| 21    | 16    |
| hsa_c | hsa_c |
| irc_0 | irc_0 |
| 0662  | 0574  |
| 22    | 17    |
| hsa_c | hsa_c |
| irc_0 | irc_0 |
| 0662  | 0574  |
| 23    | 21    |
| hsa_c | hsa_c |
| irc_0 | irc_0 |
| 0662  | 0575  |
| 24    | 39    |
| hsa_c | hsa_c |
| irc_0 | irc_0 |
| 0183  | 0577  |
| 1     | 20    |
| hsa_c | hsa_c |
| irc_0 | irc_0 |
| 0662  | 0577  |
| 87    | 22    |
| hsa_c | hsa_c |
| irc_0 | irc_0 |
| 0662  | 0577  |
| 88    | 71    |
| hsa_c | hsa_c |
| irc_0 | irc_0 |
| 0662  | 0578  |
| 92    | 36    |
| hsa_c | hsa_c |
| irc_0 | irc_0 |
| 0662  | 0578  |
| 93    | 37    |
| hsa_c | hsa_c |
| irc_0 | irc_0 |
| 0662  | 0578  |
| 94    | 43    |
| hsa_c | hsa_c |
| irc_0 | irc_0 |
| 0662  | 0578  |
| 95    | 49    |
| hsa_c | hsa_c |
| irc_0 | irc_0 |
| 0662  | 0578  |
| 96    | 54    |
| hsa_c | hsa_c |
| irc_0 | irc_0 |
| 0662  | 0578  |

|       |       |
|-------|-------|
| 97    | 55    |
| hsa_c | hsa_c |
| irc_0 | irc_0 |
| 0662  | 0578  |
| 98    | 59    |
| hsa_c | hsa_c |
| irc_0 | irc_0 |
| 0662  | 0578  |
| 99    | 60    |
| hsa_c | hsa_c |
| irc_0 | irc_0 |
| 0663  | 0578  |
| 00    | 61    |
| hsa_c | hsa_c |
| irc_0 | irc_0 |
| 0663  | 0580  |
| 01    | 04    |
| hsa_c | hsa_c |
| irc_0 | irc_0 |
| 0663  | 0580  |
| 02    | 18    |
| hsa_c | hsa_c |
| irc_0 | irc_0 |
| 0663  | 0580  |
| 04    | 20    |
| hsa_c | hsa_c |
| irc_0 | irc_0 |
| 0663  | 0580  |
| 06    | 22    |
| hsa_c | hsa_c |
| irc_0 | irc_0 |
| 0663  | 0580  |
| 07    | 23    |
| hsa_c | hsa_c |
| irc_0 | irc_0 |
| 0663  | 0580  |
| 08    | 24    |
| hsa_c | hsa_c |
| irc_0 | irc_0 |
| 0663  | 0581  |
| 09    | 60    |
| hsa_c | hsa_c |
| irc_0 | irc_0 |
| 0663  | 0581  |
| 11    | 90    |
| hsa_c | hsa_c |
| irc_0 | irc_0 |
| 0663  | 0582  |
| 12    | 29    |
| hsa_c | hsa_c |
| irc_0 | irc_0 |
| 0663  | 0582  |
| 13    | 30    |
| hsa_c | hsa_c |

|       |       |
|-------|-------|
| irc_0 | irc_0 |
| 0663  | 0582  |
| 14    | 42    |
| hsa_c | hsa_c |
| irc_0 | irc_0 |
| 0663  | 0582  |
| 15    | 43    |
| hsa_c | hsa_c |
| irc_0 | irc_0 |
| 0663  | 0582  |
| 16    | 82    |
| hsa_c | hsa_c |
| irc_0 | irc_0 |
| 0663  | 0582  |
| 17    | 84    |
| hsa_c | hsa_c |
| irc_0 | irc_0 |
| 0663  | 0582  |
| 18    | 85    |
| hsa_c | hsa_c |
| irc_0 | irc_0 |
| 0664  | 0582  |
| 25    | 86    |
| hsa_c | hsa_c |
| irc_0 | irc_0 |
| 0664  | 0583  |
| 20    | 11    |
| hsa_c | hsa_c |
| irc_0 | irc_0 |
| 0664  | 0583  |
| 32    | 14    |
| hsa_c | hsa_c |
| irc_0 | irc_0 |
| 0664  | 0583  |
| 36    | 16    |
| hsa_c | hsa_c |
| irc_0 | irc_0 |
| 0665  | 0583  |
| 04    | 17    |
| hsa_c | hsa_c |
| irc_0 | irc_0 |
| 0665  | 0583  |
| 06    | 56    |
| hsa_c | hsa_c |
| irc_0 | irc_0 |
| 0665  | 0583  |
| 07    | 57    |
| hsa_c | hsa_c |
| irc_0 | irc_0 |
| 0665  | 0583  |
| 08    | 58    |
| hsa_c | hsa_c |
| irc_0 | irc_0 |
| 0666  | 0583  |
| 06    | 59    |

|       |       |
|-------|-------|
| hsa_c | hsa_c |
| irc_0 | irc_0 |
| 0666  | 0583  |
| 10    | 61    |
| hsa_c | hsa_c |
| irc_0 | irc_0 |
| 0666  | 0583  |
| 11    | 66    |
| hsa_c | hsa_c |
| irc_0 | irc_0 |
| 0666  | 0583  |
| 35    | 68    |
| hsa_c | hsa_c |
| irc_0 | irc_0 |
| 0076  | 0583  |
| 01    | 70    |
| hsa_c | hsa_c |
| irc_0 | irc_0 |
| 0666  | 0583  |
| 36    | 71    |
| hsa_c | hsa_c |
| irc_0 | irc_0 |
| 0666  | 0583  |
| 37    | 73    |
| hsa_c | hsa_c |
| irc_0 | irc_0 |
| 0666  | 0583  |
| 38    | 81    |
| hsa_c | hsa_c |
| irc_0 | irc_0 |
| 0666  | 0035  |
| 39    | 91    |
| hsa_c | hsa_c |
| irc_0 | irc_0 |
| 0666  | 0584  |
| 40    | 87    |
| hsa_c | hsa_c |
| irc_0 | irc_0 |
| 0666  | 0584  |
| 87    | 91    |
| hsa_c | hsa_c |
| irc_0 | irc_0 |
| 0666  | 0584  |
| 90    | 98    |
| hsa_c | hsa_c |
| irc_0 | irc_0 |
| 0666  | 0020  |
| 91    | 54    |
| hsa_c | hsa_c |
| irc_0 | irc_0 |
| 0667  | 0128  |
| 12    | 3     |
| hsa_c | hsa_c |
| irc_0 | irc_0 |
| 0667  | 0586  |



|       |       |
|-------|-------|
| 73    | 65    |
| hsa_c | hsa_c |
| irc_0 | irc_0 |
| 0667  | 0586  |
| 74    | 96    |
| hsa_c | hsa_c |
| irc_0 | irc_0 |
| 0668  | 0587  |
| 33    | 09    |
| hsa_c | hsa_c |
| irc_0 | irc_0 |
| 0668  | 0587  |
| 36    | 10    |
| hsa_c | hsa_c |
| irc_0 | irc_0 |
| 0668  | 0587  |
| 35    | 11    |
| hsa_c | hsa_c |
| irc_0 | irc_0 |
| 0669  | 0587  |
| 72    | 12    |
| hsa_c | hsa_c |
| irc_0 | irc_0 |
| 0669  | 0587  |
| 76    | 13    |
| hsa_c | hsa_c |
| irc_0 | irc_0 |
| 0670  | 0587  |
| 04    | 14    |
| hsa_c | hsa_c |
| irc_0 | irc_0 |
| 0670  | 0587  |
| 38    | 15    |
| hsa_c | hsa_c |
| irc_0 | irc_0 |
| 0670  | 0587  |
| 39    | 16    |
| hsa_c | hsa_c |
| irc_0 | irc_0 |
| 0670  | 0061  |
| 40    | 21    |
| hsa_c | hsa_c |
| irc_0 | irc_0 |
| 0670  | 0588  |
| 41    | 85    |
| hsa_c | hsa_c |
| irc_0 | irc_0 |
| 0670  | 0588  |
| 89    | 83    |
| hsa_c | hsa_c |
| irc_0 | irc_0 |
| 0670  | 0589  |
| 92    | 08    |
| hsa_c | hsa_c |

|       |       |
|-------|-------|
| irc_0 | irc_0 |
| 0062  | 0589  |
| 45    | 51    |
| hsa_c | hsa_c |
| irc_0 | irc_0 |
| 0671  | 0589  |
| 17    | 79    |
| hsa_c | hsa_c |
| irc_0 | irc_0 |
| 0671  | 0589  |
| 18    | 76    |
| hsa_c | hsa_c |
| irc_0 | irc_0 |
| 0671  | 0590  |
| 19    | 04    |
| hsa_c | hsa_c |
| irc_0 | irc_0 |
| 0063  | 0640  |
| 46    | 24    |
| hsa_c | hsa_c |
| irc_0 | irc_0 |
| 0089  | 0640  |
| 23    | 25    |
| hsa_c | hsa_c |
| irc_0 | irc_0 |
| 0672  | 0640  |
| 32    | 26    |
| hsa_c | hsa_c |
| irc_0 | irc_0 |
| 0672  | 0640  |
| 34    | 94    |
| hsa_c | hsa_c |
| irc_0 | irc_0 |
| 0672  | 0640  |
| 36    | 95    |
| hsa_c | hsa_c |
| irc_0 | irc_0 |
| 0672  | 0640  |
| 37    | 96    |
| hsa_c | hsa_c |
| irc_0 | irc_0 |
| 0672  | 0640  |
| 39    | 97    |
| hsa_c | hsa_c |
| irc_0 | irc_0 |
| 0672  | 0640  |
| 40    | 98    |
| hsa_c | hsa_c |
| irc_0 | irc_0 |
| 0113  | 0641  |
| 5     | 50    |
| hsa_c | hsa_c |
| irc_0 | irc_0 |
| 0673  | 0641  |
| 18    | 53    |

|       |       |
|-------|-------|
| hsa_c | hsa_c |
| irc_0 | irc_0 |
| 0673  | 0641  |
| 19    | 46    |
| hsa_c | hsa_c |
| irc_0 | irc_0 |
| 0673  | 0641  |
| 74    | 60    |
| hsa_c | hsa_c |
| irc_0 | irc_0 |
| 0673  | 0641  |
| 94    | 64    |
| hsa_c | hsa_c |
| irc_0 | irc_0 |
| 0673  | 0641  |
| 95    | 62    |
| hsa_c | hsa_c |
| irc_0 | irc_0 |
| 0673  | 0641  |
| 98    | 59    |
| hsa_c | hsa_c |
| irc_0 | irc_0 |
| 0673  | 0641  |
| 99    | 84    |
| hsa_c | hsa_c |
| irc_0 | irc_0 |
| 0674  | 0641  |
| 00    | 83    |
| hsa_c | hsa_c |
| irc_0 | irc_0 |
| 0674  | 0641  |
| 40    | 98    |
| hsa_c | hsa_c |
| irc_0 | irc_0 |
| 0674  | 0028  |
| 41    | 65    |
| hsa_c | hsa_c |
| irc_0 | irc_0 |
| 0674  | 0643  |
| 42    | 29    |
| hsa_c | hsa_c |
| irc_0 | irc_0 |
| 0674  | 0072  |
| 50    | 78    |
| hsa_c | hsa_c |
| irc_0 | irc_0 |
| 0674  | 0643  |
| 85    | 50    |
| hsa_c | hsa_c |
| irc_0 | irc_0 |
| 0675  | 0644  |
| 44    | 98    |
| hsa_c | hsa_c |
| irc_0 | irc_0 |
| 0675  | 0645  |

|       |       |
|-------|-------|
| 45    | 28    |
| hsa_c | hsa_c |
| irc_0 | irc_0 |
| 0675  | 0645  |
| 46    | 29    |
| hsa_c | hsa_c |
| irc_0 | irc_0 |
| 0675  | 0645  |
| 47    | 30    |
| hsa_c | hsa_c |
| irc_0 | irc_0 |
| 0675  | 0645  |
| 48    | 31    |
| hsa_c | hsa_c |
| irc_0 | irc_0 |
| 0675  | 0646  |
| 49    | 15    |
| hsa_c | hsa_c |
| irc_0 | irc_0 |
| 0675  | 0646  |
| 50    | 16    |
| hsa_c | hsa_c |
| irc_0 | irc_0 |
| 0675  | 0646  |
| 51    | 18    |
| hsa_c | hsa_c |
| irc_0 | irc_0 |
| 0675  | 0646  |
| 52    | 19    |
| hsa_c | hsa_c |
| irc_0 | irc_0 |
| 0675  | 0646  |
| 53    | 20    |
| hsa_c | hsa_c |
| irc_0 | irc_0 |
| 0675  | 0646  |
| 54    | 21    |
| hsa_c | hsa_c |
| irc_0 | irc_0 |
| 0675  | 0646  |
| 65    | 22    |
| hsa_c | hsa_c |
| irc_0 | irc_0 |
| 0675  | 0029  |
| 70    | 01    |
| hsa_c | hsa_c |
| irc_0 | irc_0 |
| 0675  | 0646  |
| 71    | 73    |
| hsa_c | hsa_c |
| irc_0 | irc_0 |
| 0676  | 0646  |
| 66    | 84    |
| hsa_c | hsa_c |

|       |       |
|-------|-------|
| irc_0 | irc_0 |
| 0676  | 0648  |
| 81    | 17    |
| hsa_c | hsa_c |
| irc_0 | irc_0 |
| 0676  | 0648  |
| 99    | 75    |
| hsa_c | hsa_c |
| irc_0 | irc_0 |
| 0035  | 0648  |
| 02    | 74    |
| hsa_c | hsa_c |
| irc_0 | irc_0 |
| 0045  | 0648  |
| 65    | 95    |
| hsa_c | hsa_c |
| irc_0 | irc_0 |
| 0053  | 0648  |
| 42    | 96    |
| hsa_c | hsa_c |
| irc_0 | irc_0 |
| 0068  | 0648  |
| 01    | 93    |
| hsa_c | hsa_c |
| irc_0 | irc_0 |
| 0677  | 0649  |
| 18    | 27    |
| hsa_c | hsa_c |
| irc_0 | irc_0 |
| 0677  | 0649  |
| 20    | 73    |
| hsa_c | hsa_c |
| irc_0 | irc_0 |
| 0677  | 0649  |
| 21    | 70    |
| hsa_c | hsa_c |
| irc_0 | irc_0 |
| 0677  | 0650  |
| 22    | 25    |
| hsa_c | hsa_c |
| irc_0 | irc_0 |
| 0677  | 0650  |
| 23    | 24    |
| hsa_c | hsa_c |
| irc_0 | irc_0 |
| 0677  | 0650  |
| 24    | 23    |
| hsa_c | hsa_c |
| irc_0 | irc_0 |
| 0677  | 0650  |
| 25    | 63    |
| hsa_c | hsa_c |
| irc_0 | irc_0 |
| 0677  | 0650  |
| 26    | 64    |

|       |       |
|-------|-------|
| hsa_c | hsa_c |
| irc_0 | irc_0 |
| 0677  | 0650  |
| 27    | 65    |
| hsa_c | hsa_c |
| irc_0 | irc_0 |
| 0189  | 0651  |
| 1     | 33    |
| hsa_c | hsa_c |
| irc_0 | irc_0 |
| 0678  | 0054  |
| 63    | 35    |
| hsa_c | hsa_c |
| irc_0 | irc_0 |
| 0678  | 0652  |
| 84    | 40    |
| hsa_c | hsa_c |
| irc_0 | irc_0 |
| 0200  | 0652  |
| 0     | 46    |
| hsa_c | hsa_c |
| irc_0 | irc_0 |
| 0192  | 0652  |
| 2     | 47    |
| hsa_c | hsa_c |
| irc_0 | irc_0 |
| 0679  | 0652  |
| 49    | 54    |
| hsa_c | hsa_c |
| irc_0 | irc_0 |
| 0679  | 0652  |
| 79    | 68    |
| hsa_c | hsa_c |
| irc_0 | irc_0 |
| 0679  | 0652  |
| 88    | 79    |
| hsa_c | hsa_c |
| irc_0 | irc_0 |
| 0680  | 0652  |
| 09    | 82    |
| hsa_c | hsa_c |
| irc_0 | irc_0 |
| 0680  | 0652  |
| 38    | 73    |
| hsa_c | hsa_c |
| irc_0 | irc_0 |
| 0680  | 0053  |
| 39    | 67    |
| hsa_c | hsa_c |
| irc_0 | irc_0 |
| 0680  | 0129  |
| 40    | 6     |
| hsa_c | hsa_c |
| irc_0 | irc_0 |
| 0680  | 0653  |

|       |       |
|-------|-------|
| 41    | 49    |
| hsa_c | hsa_c |
| irc_0 | irc_0 |
| 0680  | 0653  |
| 42    | 48    |
| hsa_c | hsa_c |
| irc_0 | irc_0 |
| 0680  | 0030  |
| 43    | 91    |
| hsa_c | hsa_c |
| irc_0 | irc_0 |
| 0680  | 0653  |
| 45    | 91    |
| hsa_c | hsa_c |
| irc_0 | irc_0 |
| 0680  | 0653  |
| 47    | 90    |
| hsa_c | hsa_c |
| irc_0 | irc_0 |
| 0680  | 0653  |
| 48    | 92    |
| hsa_c | hsa_c |
| irc_0 | irc_0 |
| 0680  | 0654  |
| 49    | 82    |
| hsa_c | hsa_c |
| irc_0 | irc_0 |
| 0680  | 0654  |
| 50    | 83    |
| hsa_c | hsa_c |
| irc_0 | irc_0 |
| 0680  | 0654  |
| 51    | 84    |
| hsa_c | hsa_c |
| irc_0 | irc_0 |
| 0680  | 0654  |
| 52    | 79    |
| hsa_c | hsa_c |
| irc_0 | irc_0 |
| 0680  | 0654  |
| 53    | 86    |
| hsa_c | hsa_c |
| irc_0 | irc_0 |
| 0680  | 0655  |
| 68    | 03    |
| hsa_c | hsa_c |
| irc_0 | irc_0 |
| 0680  | 0655  |
| 74    | 10    |
| hsa_c | hsa_c |
| irc_0 | irc_0 |
| 0681  | 0655  |
| 45    | 11    |
| hsa_c | hsa_c |

|       |       |
|-------|-------|
| irc_0 | irc_0 |
| 0681  | 0655  |
| 88    | 15    |
| hsa_c | hsa_c |
| irc_0 | irc_0 |
| 0682  | 0655  |
| 37    | 09    |
| hsa_c | hsa_c |
| irc_0 | irc_0 |
| 0683  | 0655  |
| 86    | 51    |
| hsa_c | hsa_c |
| irc_0 | irc_0 |
| 0683  | 0655  |
| 87    | 52    |
| hsa_c | hsa_c |
| irc_0 | irc_0 |
| 0683  | 0655  |
| 93    | 57    |
| hsa_c | hsa_c |
| irc_0 | irc_0 |
| 0683  | 0655  |
| 94    | 58    |
| hsa_c | hsa_c |
| irc_0 | irc_0 |
| 0683  | 0655  |
| 95    | 59    |
| hsa_c | hsa_c |
| irc_0 | irc_0 |
| 0684  | 0655  |
| 18    | 60    |
| hsa_c | hsa_c |
| irc_0 | irc_0 |
| 0684  | 0655  |
| 87    | 61    |
| hsa_c | hsa_c |
| irc_0 | irc_0 |
| 0684  | 0655  |
| 90    | 62    |
| hsa_c | hsa_c |
| irc_0 | irc_0 |
| 0684  | 0656  |
| 98    | 14    |
| hsa_c | hsa_c |
| irc_0 | irc_0 |
| 0684  | 0656  |
| 99    | 15    |
| hsa_c | hsa_c |
| irc_0 | irc_0 |
| 0685  | 0656  |
| 00    | 16    |
| hsa_c | hsa_c |
| irc_0 | irc_0 |
| 0685  | 0656  |
| 12    | 20    |



|       |       |
|-------|-------|
| hsa_c | hsa_c |
| irc_0 | irc_0 |
| 0073  | 0656  |
| 47    | 21    |
| hsa_c | hsa_c |
| irc_0 | irc_0 |
| 0685  | 0656  |
| 69    | 27    |
| hsa_c | hsa_c |
| irc_0 | irc_0 |
| 0685  | 0656  |
| 70    | 28    |
| hsa_c | hsa_c |
| irc_0 | irc_0 |
| 0685  | 0656  |
| 72    | 29    |
| hsa_c | hsa_c |
| irc_0 | irc_0 |
| 0685  | 0656  |
| 73    | 30    |
| hsa_c | hsa_c |
| irc_0 | irc_0 |
| 0685  | 0656  |
| 75    | 32    |
| hsa_c | hsa_c |
| irc_0 | irc_0 |
| 0685  | 0045  |
| 76    | 81    |
| hsa_c | hsa_c |
| irc_0 | irc_0 |
| 0687  | 0656  |
| 81    | 59    |
| hsa_c | hsa_c |
| irc_0 | irc_0 |
| 0688  | 0656  |
| 58    | 60    |
| hsa_c | hsa_c |
| irc_0 | irc_0 |
| 0688  | 0656  |
| 60    | 70    |
| hsa_c | hsa_c |
| irc_0 | irc_0 |
| 0688  | 0656  |
| 63    | 62    |
| hsa_c | hsa_c |
| irc_0 | irc_0 |
| 0688  | 0656  |
| 64    | 63    |
| hsa_c | hsa_c |
| irc_0 | irc_0 |
| 0688  | 0656  |
| 66    | 64    |
| hsa_c | hsa_c |
| irc_0 | irc_0 |
| 0688  | 0656  |

|       |       |
|-------|-------|
| 67    | 65    |
| hsa_c | hsa_c |
| irc_0 | irc_0 |
| 0688  | 0656  |
| 78    | 66    |
| hsa_c | hsa_c |
| irc_0 | irc_0 |
| 0688  | 0656  |
| 79    | 71    |
| hsa_c | hsa_c |
| irc_0 | irc_0 |
| 0688  | 0656  |
| 80    | 72    |
| hsa_c | hsa_c |
| irc_0 | irc_0 |
| 0688  | 0657  |
| 81    | 23    |
| hsa_c | hsa_c |
| irc_0 | irc_0 |
| 0688  | 0657  |
| 82    | 26    |
| hsa_c | hsa_c |
| irc_0 | irc_0 |
| 0688  | 0657  |
| 93    | 27    |
| hsa_c | hsa_c |
| irc_0 | irc_0 |
| 0691  | 0657  |
| 24    | 31    |
| hsa_c | hsa_c |
| irc_0 | irc_0 |
| 0691  | 0657  |
| 25    | 36    |
| hsa_c | hsa_c |
| irc_0 | irc_0 |
| 0691  | 0657  |
| 94    | 37    |
| hsa_c | hsa_c |
| irc_0 | irc_0 |
| 0691  | 0657  |
| 95    | 38    |
| hsa_c | hsa_c |
| irc_0 | irc_0 |
| 0691  | 0657  |
| 96    | 15    |
| hsa_c | hsa_c |
| irc_0 | irc_0 |
| 0691  | 0657  |
| 97    | 41    |
| hsa_c | hsa_c |
| irc_0 | irc_0 |
| 0692  | 0657  |
| 22    | 42    |

|       |       |
|-------|-------|
| hsa_c | hsa_c |
| irc_0 | irc_0 |
| 0692  | 0657  |
| 23    | 40    |
| hsa_c | hsa_c |
| irc_0 | irc_0 |
| 0692  | 0657  |
| 83    | 46    |
| hsa_c | hsa_c |
| irc_0 | irc_0 |
| 0693  | 0657  |
| 17    | 47    |
| hsa_c | hsa_c |
| irc_0 | irc_0 |
| 0071  | 0657  |
| 07    | 49    |
| hsa_c | hsa_c |
| irc_0 | irc_0 |
| 0693  | 0657  |
| 64    | 50    |
| hsa_c | hsa_c |
| irc_0 | irc_0 |
| 0693  | 0657  |
| 69    | 51    |
| hsa_c | hsa_c |
| irc_0 | irc_0 |
| 0693  | 0657  |
| 72    | 52    |
| hsa_c | hsa_c |
| irc_0 | irc_0 |
| 0693  | 0657  |
| 73    | 53    |
| hsa_c | hsa_c |
| irc_0 | irc_0 |
| 0693  | 0657  |
| 74    | 54    |
| hsa_c | hsa_c |
| irc_0 | irc_0 |
| 0693  | 0658  |
| 75    | 27    |
| hsa_c | hsa_c |
| irc_0 | irc_0 |
| 0693  | 0658  |
| 76    | 31    |
| hsa_c | hsa_c |
| irc_0 | irc_0 |
| 0693  | 0658  |
| 93    | 38    |
| hsa_c | hsa_c |
| irc_0 | irc_0 |
| 0694  | 0658  |
| 41    | 53    |
| hsa_c | hsa_c |
| irc_0 | irc_0 |
| 0694  | 0658  |

|       |       |
|-------|-------|
| 43    | 65    |
| hsa_c | hsa_c |
| irc_0 | irc_0 |
| 0694  | 0658  |
| 44    | 66    |
| hsa_c | hsa_c |
| irc_0 | irc_0 |
| 0694  | 0054  |
| 45    | 49    |
| hsa_c | hsa_c |
| irc_0 | irc_0 |
| 0694  | 0659  |
| 46    | 22    |
| hsa_c | hsa_c |
| irc_0 | irc_0 |
| 0694  | 0659  |
| 47    | 24    |
| hsa_c | hsa_c |
| irc_0 | irc_0 |
| 0694  | 0659  |
| 48    | 25    |
| hsa_c | hsa_c |
| irc_0 | irc_0 |
| 0694  | 0054  |
| 49    | 16    |
| hsa_c | hsa_c |
| irc_0 | irc_0 |
| 0694  | 0659  |
| 75    | 55    |
| hsa_c | hsa_c |
| irc_0 | irc_0 |
| 0694  | 0659  |
| 76    | 56    |
| hsa_c | hsa_c |
| irc_0 | irc_0 |
| 0694  | 0659  |
| 78    | 54    |
| hsa_c | hsa_c |
| irc_0 | irc_0 |
| 0695  | 0659  |
| 49    | 62    |
| hsa_c | hsa_c |
| irc_0 | irc_0 |
| 0696  | 0659  |
| 16    | 75    |
| hsa_c | hsa_c |
| irc_0 | irc_0 |
| 0696  | 0660  |
| 20    | 36    |
| hsa_c | hsa_c |
| irc_0 | irc_0 |
| 0696  | 0660  |
| 21    | 37    |
| hsa_c | hsa_c |

|       |       |
|-------|-------|
| irc_0 | irc_0 |
| 0020  | 0660  |
| 21    | 38    |
| hsa_c | hsa_c |
| irc_0 | irc_0 |
| 0696  | 0660  |
| 86    | 39    |
| hsa_c | hsa_c |
| irc_0 | irc_0 |
| 0696  | 0660  |
| 98    | 71    |
| hsa_c | hsa_c |
| irc_0 | irc_0 |
| 0696  | 0660  |
| 99    | 72    |
| hsa_c | hsa_c |
| irc_0 | irc_0 |
| 0697  | 0660  |
| 05    | 73    |
| hsa_c | hsa_c |
| irc_0 | irc_0 |
| 0697  | 0660  |
| 06    | 74    |
| hsa_c | hsa_c |
| irc_0 | irc_0 |
| 0697  | 0028  |
| 07    | 01    |
| hsa_c | hsa_c |
| irc_0 | irc_0 |
| 0697  | 0660  |
| 08    | 82    |
| hsa_c | hsa_c |
| irc_0 | irc_0 |
| 0697  | 0660  |
| 09    | 91    |
| hsa_c | hsa_c |
| irc_0 | irc_0 |
| 0697  | 0660  |
| 10    | 94    |
| hsa_c | hsa_c |
| irc_0 | irc_0 |
| 0130  | 0660  |
| 1     | 95    |
| hsa_c | hsa_c |
| irc_0 | irc_0 |
| 0698  | 0661  |
| 52    | 23    |
| hsa_c | hsa_c |
| irc_0 | irc_0 |
| 0698  | 0661  |
| 67    | 24    |
| hsa_c | hsa_c |
| irc_0 | irc_0 |
| 0699  | 0661  |
| 20    | 28    |

|       |       |
|-------|-------|
| hsa_c | hsa_c |
| irc_0 | irc_0 |
| 0699  | 0661  |
| 32    | 29    |
| hsa_c | hsa_c |
| irc_0 | irc_0 |
| 0699  | 0661  |
| 33    | 27    |
| hsa_c | hsa_c |
| irc_0 | irc_0 |
| 0699  | 0661  |
| 34    | 30    |
| hsa_c | hsa_c |
| irc_0 | irc_0 |
| 0699  | 0661  |
| 35    | 31    |
| hsa_c | hsa_c |
| irc_0 | irc_0 |
| 0700  | 0661  |
| 14    | 39    |
| hsa_c | hsa_c |
| irc_0 | irc_0 |
| 0700  | 0661  |
| 47    | 38    |
| hsa_c | hsa_c |
| irc_0 | irc_0 |
| 0700  | 0661  |
| 50    | 41    |
| hsa_c | hsa_c |
| irc_0 | irc_0 |
| 0700  | 0661  |
| 49    | 42    |
| hsa_c | hsa_c |
| irc_0 | irc_0 |
| 0700  | 0661  |
| 94    | 45    |
| hsa_c | hsa_c |
| irc_0 | irc_0 |
| 0701  | 0661  |
| 26    | 47    |
| hsa_c | hsa_c |
| irc_0 | irc_0 |
| 0701  | 0661  |
| 62    | 48    |
| hsa_c | hsa_c |
| irc_0 | irc_0 |
| 0701  | 0661  |
| 77    | 49    |
| hsa_c | hsa_c |
| irc_0 | irc_0 |
| 0701  | 0663  |
| 82    | 89    |
| hsa_c | hsa_c |
| irc_0 | irc_0 |
| 0090  | 0664  |

|       |       |
|-------|-------|
| 36    | 20    |
| hsa_c | hsa_c |
| irc_0 | irc_0 |
| 0703  | 0664  |
| 73    | 24    |
| hsa_c | hsa_c |
| irc_0 | irc_0 |
| 0000  | 0664  |
| 9     | 19    |
| hsa_c | hsa_c |
| irc_0 | irc_0 |
| 0703  | 0664  |
| 93    | 51    |
| hsa_c | hsa_c |
| irc_0 | irc_0 |
| 0704  | 0664  |
| 16    | 54    |
| hsa_c | hsa_c |
| irc_0 | irc_0 |
| 0704  | 0664  |
| 24    | 56    |
| hsa_c | hsa_c |
| irc_0 | irc_0 |
| 0704  | 0664  |
| 26    | 57    |
| hsa_c | hsa_c |
| irc_0 | irc_0 |
| 0704  | 0664  |
| 29    | 58    |
| hsa_c | hsa_c |
| irc_0 | irc_0 |
| 0052  | 0664  |
| 33    | 68    |
| hsa_c | hsa_c |
| irc_0 | irc_0 |
| 0704  | 0032  |
| 66    | 10    |
| hsa_c | hsa_c |
| irc_0 | irc_0 |
| 0704  | 0038  |
| 68    | 06    |
| hsa_c | hsa_c |
| irc_0 | irc_0 |
| 0704  | 0054  |
| 72    | 52    |
| hsa_c | hsa_c |
| irc_0 | irc_0 |
| 0704  | 0665  |
| 73    | 93    |
| hsa_c | hsa_c |
| irc_0 | irc_0 |
| 0704  | 0665  |
| 74    | 95    |
| hsa_c | hsa_c |

|       |       |
|-------|-------|
| irc_0 | irc_0 |
| 0130  | 0666  |
| 5     | 06    |
| hsa_c | hsa_c |
| irc_0 | irc_0 |
| 0704  | 0666  |
| 90    | 35    |
| hsa_c | hsa_c |
| irc_0 | irc_0 |
| 0705  | 0049  |
| 79    | 33    |
| hsa_c | hsa_c |
| irc_0 | irc_0 |
| 0705  | 0667  |
| 80    | 03    |
| hsa_c | hsa_c |
| irc_0 | irc_0 |
| 0705  | 0668  |
| 81    | 27    |
| hsa_c | hsa_c |
| irc_0 | irc_0 |
| 0705  | 0668  |
| 82    | 28    |
| hsa_c | hsa_c |
| irc_0 | irc_0 |
| 0705  | 0668  |
| 83    | 29    |
| hsa_c | hsa_c |
| irc_0 | irc_0 |
| 0708  | 0668  |
| 44    | 32    |
| hsa_c | hsa_c |
| irc_0 | irc_0 |
| 0708  | 0668  |
| 52    | 33    |
| hsa_c | hsa_c |
| irc_0 | irc_0 |
| 0708  | 0668  |
| 53    | 35    |
| hsa_c | hsa_c |
| irc_0 | irc_0 |
| 0708  | 0668  |
| 54    | 38    |
| hsa_c | hsa_c |
| irc_0 | irc_0 |
| 0708  | 0668  |
| 56    | 39    |
| hsa_c | hsa_c |
| irc_0 | irc_0 |
| 0708  | 0668  |
| 59    | 37    |
| hsa_c | hsa_c |
| irc_0 | irc_0 |
| 0708  | 0668  |
| 62    | 79    |



|       |       |
|-------|-------|
| hsa_c | hsa_c |
| irc_0 | irc_0 |
| 0708  | 0669  |
| 63    | 13    |
| hsa_c | hsa_c |
| irc_0 | irc_0 |
| 0708  | 0669  |
| 64    | 10    |
| hsa_c | hsa_c |
| irc_0 | irc_0 |
| 0708  | 0065  |
| 65    | 60    |
| hsa_c | hsa_c |
| irc_0 | irc_0 |
| 0708  | 0670  |
| 87    | 84    |
| hsa_c | hsa_c |
| irc_0 | irc_0 |
| 0708  | 0670  |
| 96    | 89    |
| hsa_c | hsa_c |
| irc_0 | irc_0 |
| 0708  | 0670  |
| 97    | 92    |
| hsa_c | hsa_c |
| irc_0 | irc_0 |
| 0708  | 0671  |
| 98    | 28    |
| hsa_c | hsa_c |
| irc_0 | irc_0 |
| 0709  | 0671  |
| 20    | 38    |
| hsa_c | hsa_c |
| irc_0 | irc_0 |
| 0709  | 0671  |
| 47    | 81    |
| hsa_c | hsa_c |
| irc_0 | irc_0 |
| 0709  | 0671  |
| 48    | 94    |
| hsa_c | hsa_c |
| irc_0 | irc_0 |
| 0709  | 0672  |
| 49    | 20    |
| hsa_c | hsa_c |
| irc_0 | irc_0 |
| 0709  | 0672  |
| 52    | 42    |
| hsa_c | hsa_c |
| irc_0 | irc_0 |
| 0709  | 0672  |
| 69    | 44    |
| hsa_c | hsa_c |
| irc_0 | irc_0 |
| 0709  | 0672  |

|       |       |
|-------|-------|
| 70    | 47    |
| hsa_c | hsa_c |
| irc_0 | irc_0 |
| 0710  | 0672  |
| 04    | 48    |
| hsa_c | hsa_c |
| irc_0 | irc_0 |
| 0710  | 0672  |
| 05    | 92    |
| hsa_c | hsa_c |
| irc_0 | irc_0 |
| 0710  | 0673  |
| 06    | 03    |
| hsa_c | hsa_c |
| irc_0 | irc_0 |
| 0710  | 0672  |
| 07    | 99    |
| hsa_c | hsa_c |
| irc_0 | irc_0 |
| 0710  | 0673  |
| 08    | 05    |
| hsa_c | hsa_c |
| irc_0 | irc_0 |
| 0710  | 0673  |
| 09    | 06    |
| hsa_c | hsa_c |
| irc_0 | irc_0 |
| 0710  | 0673  |
| 40    | 07    |
| hsa_c | hsa_c |
| irc_0 | irc_0 |
| 0710  | 0673  |
| 41    | 08    |
| hsa_c | hsa_c |
| irc_0 | irc_0 |
| 0710  | 0672  |
| 79    | 98    |
| hsa_c | hsa_c |
| irc_0 | irc_0 |
| 0711  | 0673  |
| 71    | 91    |
| hsa_c | hsa_c |
| irc_0 | irc_0 |
| 0711  | 0674  |
| 82    | 43    |
| hsa_c | hsa_c |
| irc_0 | irc_0 |
| 0711  | 0675  |
| 83    | 98    |
| hsa_c | hsa_c |
| irc_0 | irc_0 |
| 0711  | 0675  |
| 84    | 99    |
| hsa_c | hsa_c |

|       |       |
|-------|-------|
| irc_0 | irc_0 |
| 0712  | 0676  |
| 02    | 00    |
| hsa_c | hsa_c |
| irc_0 | irc_0 |
| 0712  | 0676  |
| 03    | 01    |
| hsa_c | hsa_c |
| irc_0 | irc_0 |
| 0712  | 0676  |
| 21    | 02    |
| hsa_c | hsa_c |
| irc_0 | irc_0 |
| 0712  | 0676  |
| 22    | 03    |
| hsa_c | hsa_c |
| irc_0 | irc_0 |
| 0712  | 0676  |
| 28    | 04    |
| hsa_c | hsa_c |
| irc_0 | irc_0 |
| 0712  | 0675  |
| 29    | 97    |
| hsa_c | hsa_c |
| irc_0 | irc_0 |
| 0712  | 0676  |
| 80    | 29    |
| hsa_c | hsa_c |
| irc_0 | irc_0 |
| 0712  | 0676  |
| 82    | 30    |
| hsa_c | hsa_c |
| irc_0 | irc_0 |
| 0712  | 0676  |
| 83    | 33    |
| hsa_c | hsa_c |
| irc_0 | irc_0 |
| 0712  | 0676  |
| 84    | 39    |
| hsa_c | hsa_c |
| irc_0 | irc_0 |
| 0713  | 0676  |
| 19    | 40    |
| hsa_c | hsa_c |
| irc_0 | irc_0 |
| 0713  | 0676  |
| 20    | 42    |
| hsa_c | hsa_c |
| irc_0 | irc_0 |
| 0713  | 0676  |
| 34    | 43    |
| hsa_c | hsa_c |
| irc_0 | irc_0 |
| 0713  | 0676  |
| 35    | 44    |

|       |       |
|-------|-------|
| hsa_c | hsa_c |
| irc_0 | irc_0 |
| 0713  | 0676  |
| 36    | 25    |
| hsa_c | hsa_c |
| irc_0 | irc_0 |
| 0713  | 0067  |
| 41    | 31    |
| hsa_c | hsa_c |
| irc_0 | irc_0 |
| 0713  | 0676  |
| 37    | 80    |
| hsa_c | hsa_c |
| irc_0 | irc_0 |
| 0713  | 0037  |
| 38    | 56    |
| hsa_c | hsa_c |
| irc_0 | irc_0 |
| 0713  | 0676  |
| 39    | 81    |
| hsa_c | hsa_c |
| irc_0 | irc_0 |
| 0713  | 0676  |
| 40    | 89    |
| hsa_c | hsa_c |
| irc_0 | irc_0 |
| 0714  | 0678  |
| 36    | 44    |
| hsa_c | hsa_c |
| irc_0 | irc_0 |
| 0714  | 0678  |
| 37    | 84    |
| hsa_c | hsa_c |
| irc_0 | irc_0 |
| 0022  | 0679  |
| 12    | 72    |
| hsa_c | hsa_c |
| irc_0 | irc_0 |
| 0041  | 0679  |
| 81    | 66    |
| hsa_c | hsa_c |
| irc_0 | irc_0 |
| 0052  | 0680  |
| 74    | 42    |
| hsa_c | hsa_c |
| irc_0 | irc_0 |
| 0066  | 0680  |
| 80    | 63    |
| hsa_c | hsa_c |
| irc_0 | irc_0 |
| 0714  | 0682  |
| 93    | 63    |
| hsa_c | hsa_c |
| irc_0 | irc_0 |
| 0714  | 0682  |

|       |       |
|-------|-------|
| 94    | 66    |
| hsa_c | hsa_c |
| irc_0 | irc_0 |
| 0715  | 0682  |
| 08    | 67    |
| hsa_c | hsa_c |
| irc_0 | irc_0 |
| 0715  | 0682  |
| 11    | 69    |
| hsa_c | hsa_c |
| irc_0 | irc_0 |
| 0715  | 0683  |
| 12    | 07    |
| hsa_c | hsa_c |
| irc_0 | irc_0 |
| 0715  | 0683  |
| 13    | 14    |
| hsa_c | hsa_c |
| irc_0 | irc_0 |
| 0715  | 0683  |
| 14    | 15    |
| hsa_c | hsa_c |
| irc_0 | irc_0 |
| 0715  | 0683  |
| 15    | 13    |
| hsa_c | hsa_c |
| irc_0 | irc_0 |
| 0715  | 0683  |
| 58    | 86    |
| hsa_c | hsa_c |
| irc_0 | irc_0 |
| 0715  | 0683  |
| 63    | 87    |
| hsa_c | hsa_c |
| irc_0 | irc_0 |
| 0715  | 0683  |
| 68    | 92    |
| hsa_c | hsa_c |
| irc_0 | irc_0 |
| 0715  | 0683  |
| 71    | 93    |
| hsa_c | hsa_c |
| irc_0 | irc_0 |
| 0715  | 0683  |
| 72    | 94    |
| hsa_c | hsa_c |
| irc_0 | irc_0 |
| 0715  | 0683  |
| 85    | 95    |
| hsa_c | hsa_c |
| irc_0 | irc_0 |
| 0716  | 0685  |
| 37    | 11    |
| hsa_c | hsa_c |

|       |       |
|-------|-------|
| irc_0 | irc_0 |
| 0716  | 0685  |
| 62    | 29    |
| hsa_c | hsa_c |
| irc_0 | irc_0 |
| 0717  | 0685  |
| 43    | 28    |
| hsa_c | hsa_c |
| irc_0 | irc_0 |
| 0717  | 0685  |
| 45    | 33    |
| hsa_c | hsa_c |
| irc_0 | irc_0 |
| 0718  | 0685  |
| 71    | 35    |
| hsa_c | hsa_c |
| irc_0 | irc_0 |
| 0081  | 0685  |
| 36    | 36    |
| hsa_c | hsa_c |
| irc_0 | irc_0 |
| 0171  | 0685  |
| 0     | 38    |
| hsa_c | hsa_c |
| irc_0 | irc_0 |
| 0721  | 0685  |
| 68    | 39    |
| hsa_c | hsa_c |
| irc_0 | irc_0 |
| 0721  | 0685  |
| 69    | 41    |
| hsa_c | hsa_c |
| irc_0 | irc_0 |
| 0721  | 0078  |
| 70    | 63    |
| hsa_c | hsa_c |
| irc_0 | irc_0 |
| 0721  | 0054  |
| 71    | 47    |
| hsa_c | hsa_c |
| irc_0 | irc_0 |
| 0721  | 0685  |
| 72    | 86    |
| hsa_c | hsa_c |
| irc_0 | irc_0 |
| 0721  | 0685  |
| 75    | 89    |
| hsa_c | hsa_c |
| irc_0 | irc_0 |
| 0721  | 0093  |
| 76    | 7     |
| hsa_c | hsa_c |
| irc_0 | irc_0 |
| 0721  | 0685  |

|       |       |
|-------|-------|
| 81    | 91    |
| hsa_c | hsa_c |
| irc_0 | irc_0 |
| 0721  | 0685  |
| 82    | 92    |
| hsa_c | hsa_c |
| irc_0 | irc_0 |
| 0721  | 0685  |
| 88    | 93    |
| hsa_c | hsa_c |
| irc_0 | irc_0 |
| 0189  | 0685  |
| 8     | 94    |
| hsa_c | hsa_c |
| irc_0 | irc_0 |
| 0722  | 0686  |
| 07    | 78    |
| hsa_c | hsa_c |
| irc_0 | irc_0 |
| 0722  | 0686  |
| 08    | 79    |
| hsa_c | hsa_c |
| irc_0 | irc_0 |
| 0722  | 0687  |
| 09    | 81    |
| hsa_c | hsa_c |
| irc_0 | irc_0 |
| 0722  | 0687  |
| 98    | 90    |
| hsa_c | hsa_c |
| irc_0 | irc_0 |
| 0722  | 0687  |
| 99    | 92    |
| hsa_c | hsa_c |
| irc_0 | irc_0 |
| 0723  | 0687  |
| 00    | 93    |
| hsa_c | hsa_c |
| irc_0 | irc_0 |
| 0723  | 0688  |
| 17    | 28    |
| hsa_c | hsa_c |
| irc_0 | irc_0 |
| 0723  | 0688  |
| 20    | 29    |
| hsa_c | hsa_c |
| irc_0 | irc_0 |
| 0723  | 0688  |
| 24    | 30    |
| hsa_c | hsa_c |
| irc_0 | irc_0 |
| 0723  | 0688  |
| 25    | 31    |
| hsa_c | hsa_c |

|       |       |
|-------|-------|
| irc_0 | irc_0 |
| 0723  | 0688  |
| 27    | 85    |
| hsa_c | hsa_c |
| irc_0 | irc_0 |
| 0723  | 0688  |
| 28    | 82    |
| hsa_c | hsa_c |
| irc_0 | irc_0 |
| 0723  | 0689  |
| 30    | 52    |
| hsa_c | hsa_c |
| irc_0 | irc_0 |
| 0723  | 0691  |
| 31    | 58    |
| hsa_c | hsa_c |
| irc_0 | irc_0 |
| 0723  | 0691  |
| 32    | 59    |
| hsa_c | hsa_c |
| irc_0 | irc_0 |
| 0723  | 0691  |
| 33    | 61    |
| hsa_c | hsa_c |
| irc_0 | irc_0 |
| 0723  | 0691  |
| 66    | 62    |
| hsa_c | hsa_c |
| irc_0 | irc_0 |
| 0723  | 0691  |
| 67    | 57    |
| hsa_c | hsa_c |
| irc_0 | irc_0 |
| 0723  | 0041  |
| 68    | 73    |
| hsa_c | hsa_c |
| irc_0 | irc_0 |
| 0723  | 0692  |
| 69    | 23    |
| hsa_c | hsa_c |
| irc_0 | irc_0 |
| 0723  | 0692  |
| 81    | 22    |
| hsa_c | hsa_c |
| irc_0 | irc_0 |
| 0723  | 0692  |
| 82    | 37    |
| hsa_c | hsa_c |
| irc_0 | irc_0 |
| 0723  | 0080  |
| 83    | 03    |
| hsa_c | hsa_c |
| irc_0 | irc_0 |
| 0724  | 0090  |
| 84    | 06    |



|       |       |
|-------|-------|
| hsa_c | hsa_c |
| irc_0 | irc_0 |
| 0724  | 0692  |
| 87    | 41    |
| hsa_c | hsa_c |
| irc_0 | irc_0 |
| 0724  | 0692  |
| 88    | 42    |
| hsa_c | hsa_c |
| irc_0 | irc_0 |
| 0725  | 0692  |
| 99    | 43    |
| hsa_c | hsa_c |
| irc_0 | irc_0 |
| 0726  | 0692  |
| 00    | 44    |
| hsa_c | hsa_c |
| irc_0 | irc_0 |
| 0727  | 0693  |
| 91    | 19    |
| hsa_c | hsa_c |
| irc_0 | irc_0 |
| 0727  | 0694  |
| 92    | 01    |
| hsa_c | hsa_c |
| irc_0 | irc_0 |
| 0728  | 0694  |
| 83    | 43    |
| hsa_c | hsa_c |
| irc_0 | irc_0 |
| 0728  | 0694  |
| 84    | 44    |
| hsa_c | hsa_c |
| irc_0 | irc_0 |
| 0728  | 0694  |
| 86    | 45    |
| hsa_c | hsa_c |
| irc_0 | irc_0 |
| 0728  | 0694  |
| 87    | 46    |
| hsa_c | hsa_c |
| irc_0 | irc_0 |
| 0728  | 0694  |
| 88    | 47    |
| hsa_c | hsa_c |
| irc_0 | irc_0 |
| 0728  | 0694  |
| 90    | 48    |
| hsa_c | hsa_c |
| irc_0 | irc_0 |
| 0728  | 0694  |
| 91    | 49    |
| hsa_c | hsa_c |
| irc_0 | irc_0 |
| 0728  | 0694  |

|       |       |
|-------|-------|
| 92    | 41    |
| hsa_c | hsa_c |
| irc_0 | irc_0 |
| 0728  | 0694  |
| 95    | 58    |
| hsa_c | hsa_c |
| irc_0 | irc_0 |
| 0728  | 0694  |
| 94    | 99    |
| hsa_c | hsa_c |
| irc_0 | irc_0 |
| 0728  | 0695  |
| 96    | 00    |
| hsa_c | hsa_c |
| irc_0 | irc_0 |
| 0728  | 0695  |
| 97    | 01    |
| hsa_c | hsa_c |
| irc_0 | irc_0 |
| 0729  | 0695  |
| 07    | 02    |
| hsa_c | hsa_c |
| irc_0 | irc_0 |
| 0729  | 0695  |
| 51    | 03    |
| hsa_c | hsa_c |
| irc_0 | irc_0 |
| 0068  | 0695  |
| 59    | 05    |
| hsa_c | hsa_c |
| irc_0 | irc_0 |
| 0730  | 0695  |
| 10    | 07    |
| hsa_c | hsa_c |
| irc_0 | irc_0 |
| 0730  | 0695  |
| 11    | 08    |
| hsa_c | hsa_c |
| irc_0 | irc_0 |
| 0730  | 0695  |
| 34    | 09    |
| hsa_c | hsa_c |
| irc_0 | irc_0 |
| 0730  | 0083  |
| 43    | 12    |
| hsa_c | hsa_c |
| irc_0 | irc_0 |
| 0021  | 0695  |
| 86    | 49    |
| hsa_c | hsa_c |
| irc_0 | irc_0 |
| 0731  | 0696  |
| 10    | 70    |
| hsa_c | hsa_c |

|       |       |
|-------|-------|
| irc_0 | irc_0 |
| 0731  | 0696  |
| 11    | 71    |
| hsa_c | hsa_c |
| irc_0 | irc_0 |
| 0731  | 0696  |
| 13    | 72    |
| hsa_c | hsa_c |
| irc_0 | irc_0 |
| 0731  | 0696  |
| 14    | 73    |
| hsa_c | hsa_c |
| irc_0 | irc_0 |
| 0731  | 0696  |
| 23    | 74    |
| hsa_c | hsa_c |
| irc_0 | irc_0 |
| 0731  | 0696  |
| 24    | 75    |
| hsa_c | hsa_c |
| irc_0 | irc_0 |
| 0731  | 0696  |
| 25    | 76    |
| hsa_c | hsa_c |
| irc_0 | irc_0 |
| 0731  | 0696  |
| 26    | 77    |
| hsa_c | hsa_c |
| irc_0 | irc_0 |
| 0022  | 0696  |
| 60    | 78    |
| hsa_c | hsa_c |
| irc_0 | irc_0 |
| 0731  | 0698  |
| 35    | 58    |
| hsa_c | hsa_c |
| irc_0 | irc_0 |
| 0731  | 0700  |
| 39    | 41    |
| hsa_c | hsa_c |
| irc_0 | irc_0 |
| 0731  | 0700  |
| 40    | 91    |
| hsa_c | hsa_c |
| irc_0 | irc_0 |
| 0731  | 0700  |
| 41    | 94    |
| hsa_c | hsa_c |
| irc_0 | irc_0 |
| 0731  | 0701  |
| 44    | 04    |
| hsa_c | hsa_c |
| irc_0 | irc_0 |
| 0731  | 0701  |
| 45    | 05    |

|       |       |
|-------|-------|
| hsa_c | hsa_c |
| irc_0 | irc_0 |
| 0731  | 0701  |
| 47    | 12    |
| hsa_c | hsa_c |
| irc_0 | irc_0 |
| 0731  | 0701  |
| 48    | 16    |
| hsa_c | hsa_c |
| irc_0 | irc_0 |
| 0731  | 0701  |
| 49    | 20    |
| hsa_c | hsa_c |
| irc_0 | irc_0 |
| 0731  | 0701  |
| 50    | 17    |
| hsa_c | hsa_c |
| irc_0 | irc_0 |
| 0731  | 0701  |
| 51    | 18    |
| hsa_c | hsa_c |
| irc_0 | irc_0 |
| 0731  | 0701  |
| 52    | 19    |
| hsa_c | hsa_c |
| irc_0 | irc_0 |
| 0731  | 0702  |
| 53    | 99    |
| hsa_c | hsa_c |
| irc_0 | irc_0 |
| 0731  | 0703  |
| 54    | 13    |
| hsa_c | hsa_c |
| irc_0 | irc_0 |
| 0732  | 0703  |
| 34    | 18    |
| hsa_c | hsa_c |
| irc_0 | irc_0 |
| 0732  | 0703  |
| 35    | 26    |
| hsa_c | hsa_c |
| irc_0 | irc_0 |
| 0732  | 0703  |
| 36    | 33    |
| hsa_c | hsa_c |
| irc_0 | irc_0 |
| 0732  | 0703  |
| 79    | 35    |
| hsa_c | hsa_c |
| irc_0 | irc_0 |
| 0732  | 0703  |
| 80    | 36    |
| hsa_c | hsa_c |
| irc_0 | irc_0 |
| 0732  | 0703  |

|       |       |
|-------|-------|
| 81    | 40    |
| hsa_c | hsa_c |
| irc_0 | irc_0 |
| 0732  | 0703  |
| 82    | 42    |
| hsa_c | hsa_c |
| irc_0 | irc_0 |
| 0732  | 0703  |
| 83    | 44    |
| hsa_c | hsa_c |
| irc_0 | irc_0 |
| 0732  | 0084  |
| 85    | 12    |
| hsa_c | hsa_c |
| irc_0 | irc_0 |
| 0732  | 0704  |
| 87    | 24    |
| hsa_c | hsa_c |
| irc_0 | irc_0 |
| 0733  | 0704  |
| 55    | 26    |
| hsa_c | hsa_c |
| irc_0 | irc_0 |
| 0733  | 0704  |
| 56    | 29    |
| hsa_c | hsa_c |
| irc_0 | irc_0 |
| 0733  | 0704  |
| 57    | 72    |
| hsa_c | hsa_c |
| irc_0 | irc_0 |
| 0733  | 0038  |
| 58    | 18    |
| hsa_c | hsa_c |
| irc_0 | irc_0 |
| 0734  | 0049  |
| 31    | 98    |
| hsa_c | hsa_c |
| irc_0 | irc_0 |
| 0734  | 0705  |
| 32    | 15    |
| hsa_c | hsa_c |
| irc_0 | irc_0 |
| 0734  | 0706  |
| 85    | 71    |
| hsa_c | hsa_c |
| irc_0 | irc_0 |
| 0734  | 0706  |
| 86    | 76    |
| hsa_c | hsa_c |
| irc_0 | irc_0 |
| 0734  | 0706  |
| 87    | 77    |
| hsa_c | hsa_c |

|       |       |
|-------|-------|
| irc_0 | irc_0 |
| 0734  | 0706  |
| 94    | 78    |
| hsa_c | hsa_c |
| irc_0 | irc_0 |
| 0030  | 0706  |
| 32    | 79    |
| hsa_c | hsa_c |
| irc_0 | irc_0 |
| 0037  | 0706  |
| 72    | 80    |
| hsa_c | hsa_c |
| irc_0 | irc_0 |
| 0064  | 0706  |
| 25    | 81    |
| hsa_c | hsa_c |
| irc_0 | irc_0 |
| 0735  | 0706  |
| 22    | 82    |
| hsa_c | hsa_c |
| irc_0 | irc_0 |
| 0735  | 0706  |
| 23    | 83    |
| hsa_c | hsa_c |
| irc_0 | irc_0 |
| 0735  | 0707  |
| 25    | 37    |
| hsa_c | hsa_c |
| irc_0 | irc_0 |
| 0735  | 0708  |
| 27    | 28    |
| hsa_c | hsa_c |
| irc_0 | irc_0 |
| 0735  | 0708  |
| 28    | 43    |
| hsa_c | hsa_c |
| irc_0 | irc_0 |
| 0735  | 0708  |
| 44    | 44    |
| hsa_c | hsa_c |
| irc_0 | irc_0 |
| 0735  | 0708  |
| 61    | 46    |
| hsa_c | hsa_c |
| irc_0 | irc_0 |
| 0735  | 0708  |
| 76    | 48    |
| hsa_c | hsa_c |
| irc_0 | irc_0 |
| 0735  | 0708  |
| 77    | 49    |
| hsa_c | hsa_c |
| irc_0 | irc_0 |
| 0046  | 0708  |
| 29    | 51    |

|       |       |
|-------|-------|
| hsa_c | hsa_c |
| irc_0 | irc_0 |
| 0090  | 0708  |
| 54    | 52    |
| hsa_c | hsa_c |
| irc_0 | irc_0 |
| 0736  | 0708  |
| 13    | 53    |
| hsa_c | hsa_c |
| irc_0 | irc_0 |
| 0736  | 0708  |
| 14    | 54    |
| hsa_c | hsa_c |
| irc_0 | irc_0 |
| 0736  | 0708  |
| 15    | 56    |
| hsa_c | hsa_c |
| irc_0 | irc_0 |
| 0736  | 0709  |
| 39    | 20    |
| hsa_c | hsa_c |
| irc_0 | irc_0 |
| 0736  | 0709  |
| 55    | 99    |
| hsa_c | hsa_c |
| irc_0 | irc_0 |
| 0736  | 0710  |
| 56    | 00    |
| hsa_c | hsa_c |
| irc_0 | irc_0 |
| 0736  | 0710  |
| 57    | 01    |
| hsa_c | hsa_c |
| irc_0 | irc_0 |
| 0736  | 0073  |
| 61    | 29    |
| hsa_c | hsa_c |
| irc_0 | irc_0 |
| 0736  | 0710  |
| 62    | 21    |
| hsa_c | hsa_c |
| irc_0 | irc_0 |
| 0736  | 0710  |
| 63    | 22    |
| hsa_c | hsa_c |
| irc_0 | irc_0 |
| 0736  | 0710  |
| 64    | 23    |
| hsa_c | hsa_c |
| irc_0 | irc_0 |
| 0736  | 0710  |
| 65    | 24    |
| hsa_c | hsa_c |
| irc_0 | irc_0 |
| 0737  | 0710  |

|       |       |
|-------|-------|
| 22    | 25    |
| hsa_c | hsa_c |
| irc_0 | irc_0 |
| 0737  | 0710  |
| 39    | 26    |
| hsa_c | hsa_c |
| irc_0 | irc_0 |
| 0737  | 0710  |
| 42    | 27    |
| hsa_c | hsa_c |
| irc_0 | irc_0 |
| 0737  | 0710  |
| 56    | 28    |
| hsa_c | hsa_c |
| irc_0 | irc_0 |
| 0737  | 0065  |
| 78    | 52    |
| hsa_c | hsa_c |
| irc_0 | irc_0 |
| 0737  | 0710  |
| 79    | 40    |
| hsa_c | hsa_c |
| irc_0 | irc_0 |
| 0737  | 0710  |
| 81    | 63    |
| hsa_c | hsa_c |
| irc_0 | irc_0 |
| 0737  | 0710  |
| 82    | 64    |
| hsa_c | hsa_c |
| irc_0 | irc_0 |
| 0737  | 0710  |
| 83    | 65    |
| hsa_c | hsa_c |
| irc_0 | irc_0 |
| 0737  | 0710  |
| 84    | 68    |
| hsa_c | hsa_c |
| irc_0 | irc_0 |
| 0737  | 0710  |
| 85    | 67    |
| hsa_c | hsa_c |
| irc_0 | irc_0 |
| 0737  | 0710  |
| 86    | 97    |
| hsa_c | hsa_c |
| irc_0 | irc_0 |
| 0737  | 0711  |
| 87    | 42    |
| hsa_c | hsa_c |
| irc_0 | irc_0 |
| 0737  | 0711  |
| 88    | 46    |
| hsa_c | hsa_c |



|       |       |
|-------|-------|
| irc_0 | irc_0 |
| 0737  | 0711  |
| 89    | 50    |
| hsa_c | hsa_c |
| irc_0 | irc_0 |
| 0737  | 0711  |
| 91    | 52    |
| hsa_c | hsa_c |
| irc_0 | irc_0 |
| 0737  | 0711  |
| 92    | 56    |
| hsa_c | hsa_c |
| irc_0 | irc_0 |
| 0740  | 0068  |
| 58    | 67    |
| hsa_c | hsa_c |
| irc_0 | irc_0 |
| 0066  | 0712  |
| 16    | 87    |
| hsa_c | hsa_c |
| irc_0 | irc_0 |
| 0741  | 0712  |
| 97    | 88    |
| hsa_c | hsa_c |
| irc_0 | irc_0 |
| 0074  | 0712  |
| 20    | 89    |
| hsa_c | hsa_c |
| irc_0 | irc_0 |
| 0743  | 0712  |
| 03    | 90    |
| hsa_c | hsa_c |
| irc_0 | irc_0 |
| 0743  | 0068  |
| 04    | 11    |
| hsa_c | hsa_c |
| irc_0 | irc_0 |
| 0743  | 0712  |
| 05    | 99    |
| hsa_c | hsa_c |
| irc_0 | irc_0 |
| 0743  | 0712  |
| 06    | 97    |
| hsa_c | hsa_c |
| irc_0 | irc_0 |
| 0743  | 0713  |
| 07    | 24    |
| hsa_c | hsa_c |
| irc_0 | irc_0 |
| 0743  | 0713  |
| 08    | 25    |
| hsa_c | hsa_c |
| irc_0 | irc_0 |
| 0743  | 0713  |
| 09    | 29    |

|       |       |
|-------|-------|
| hsa_c | hsa_c |
| irc_0 | irc_0 |
| 0743  | 0713  |
| 10    | 65    |
| hsa_c | hsa_c |
| irc_0 | irc_0 |
| 0743  | 0714  |
| 11    | 37    |
| hsa_c | hsa_c |
| irc_0 | irc_0 |
| 0743  | 0714  |
| 12    | 36    |
| hsa_c | hsa_c |
| irc_0 | irc_0 |
| 0746  | 0714  |
| 50    | 61    |
| hsa_c | hsa_c |
| irc_0 | irc_0 |
| 0746  | 0714  |
| 56    | 62    |
| hsa_c | hsa_c |
| irc_0 | irc_0 |
| 0746  | 0714  |
| 93    | 63    |
| hsa_c | hsa_c |
| irc_0 | irc_0 |
| 0746  | 0041  |
| 94    | 60    |
| hsa_c | hsa_c |
| irc_0 | irc_0 |
| 0746  | 0044  |
| 96    | 96    |
| hsa_c | hsa_c |
| irc_0 | irc_0 |
| 0746  | 0045  |
| 97    | 40    |
| hsa_c | hsa_c |
| irc_0 | irc_0 |
| 0746  | 0053  |
| 98    | 33    |
| hsa_c | hsa_c |
| irc_0 | irc_0 |
| 0746  | 0714  |
| 99    | 66    |
| hsa_c | hsa_c |
| irc_0 | irc_0 |
| 0747  | 0029  |
| 00    | 42    |
| hsa_c | hsa_c |
| irc_0 | irc_0 |
| 0747  | 0715  |
| 55    | 07    |
| hsa_c | hsa_c |
| irc_0 | irc_0 |
| 0748  | 0715  |

|       |       |
|-------|-------|
| 37    | 08    |
| hsa_c | hsa_c |
| irc_0 | irc_0 |
| 0748  | 0715  |
| 56    | 09    |
| hsa_c | hsa_c |
| irc_0 | irc_0 |
| 0749  | 0715  |
| 84    | 10    |
| hsa_c | hsa_c |
| irc_0 | irc_0 |
| 0750  | 0715  |
| 41    | 11    |
| hsa_c | hsa_c |
| irc_0 | irc_0 |
| 0750  | 0715  |
| 62    | 12    |
| hsa_c | hsa_c |
| irc_0 | irc_0 |
| 0750  | 0715  |
| 63    | 13    |
| hsa_c | hsa_c |
| irc_0 | irc_0 |
| 0750  | 0715  |
| 64    | 28    |
| hsa_c | hsa_c |
| irc_0 | irc_0 |
| 0750  | 0715  |
| 94    | 29    |
| hsa_c | hsa_c |
| irc_0 | irc_0 |
| 0750  | 0715  |
| 95    | 30    |
| hsa_c | hsa_c |
| irc_0 | irc_0 |
| 0750  | 0715  |
| 97    | 31    |
| hsa_c | hsa_c |
| irc_0 | irc_0 |
| 0152  | 0715  |
| 5     | 32    |
| hsa_c | hsa_c |
| irc_0 | irc_0 |
| 0751  | 0715  |
| 11    | 57    |
| hsa_c | hsa_c |
| irc_0 | irc_0 |
| 0751  | 0715  |
| 12    | 58    |
| hsa_c | hsa_c |
| irc_0 | irc_0 |
| 0751  | 0715  |
| 14    | 62    |
| hsa_c | hsa_c |

|       |       |
|-------|-------|
| irc_0 | irc_0 |
| 0751  | 0715  |
| 48    | 63    |
| hsa_c | hsa_c |
| irc_0 | irc_0 |
| 0751  | 0715  |
| 50    | 68    |
| hsa_c | hsa_c |
| irc_0 | irc_0 |
| 0751  | 0715  |
| 51    | 88    |
| hsa_c | hsa_c |
| irc_0 | irc_0 |
| 0751  | 0715  |
| 52    | 92    |
| hsa_c | hsa_c |
| irc_0 | irc_0 |
| 0751  | 0715  |
| 53    | 93    |
| hsa_c | hsa_c |
| irc_0 | irc_0 |
| 0751  | 0715  |
| 89    | 95    |
| hsa_c | hsa_c |
| irc_0 | irc_0 |
| 0753  | 0715  |
| 27    | 96    |
| hsa_c | hsa_c |
| irc_0 | irc_0 |
| 0753  | 0715  |
| 28    | 98    |
| hsa_c | hsa_c |
| irc_0 | irc_0 |
| 0753  | 0715  |
| 29    | 99    |
| hsa_c | hsa_c |
| irc_0 | irc_0 |
| 0753  | 0716  |
| 30    | 03    |
| hsa_c | hsa_c |
| irc_0 | irc_0 |
| 0753  | 0716  |
| 31    | 02    |
| hsa_c | hsa_c |
| irc_0 | irc_0 |
| 0754  | 0716  |
| 66    | 04    |
| hsa_c | hsa_c |
| irc_0 | irc_0 |
| 0754  | 0716  |
| 67    | 25    |
| hsa_c | hsa_c |
| irc_0 | irc_0 |
| 0754  | 0716  |
| 68    | 26    |

|       |       |
|-------|-------|
| hsa_c | hsa_c |
| irc_0 | irc_0 |
| 0754  | 0716  |
| 69    | 29    |
| hsa_c | hsa_c |
| irc_0 | irc_0 |
| 0755  | 0716  |
| 05    | 31    |
| hsa_c | hsa_c |
| irc_0 | irc_0 |
| 0755  | 0716  |
| 06    | 32    |
| hsa_c | hsa_c |
| irc_0 | irc_0 |
| 0755  | 0716  |
| 07    | 37    |
| hsa_c | hsa_c |
| irc_0 | irc_0 |
| 0755  | 0716  |
| 92    | 83    |
| hsa_c | hsa_c |
| irc_0 | irc_0 |
| 0756  | 0716  |
| 32    | 85    |
| hsa_c | hsa_c |
| irc_0 | irc_0 |
| 0756  | 0717  |
| 33    | 43    |
| hsa_c | hsa_c |
| irc_0 | irc_0 |
| 0756  | 0717  |
| 34    | 44    |
| hsa_c | hsa_c |
| irc_0 | irc_0 |
| 0756  | 0717  |
| 40    | 45    |
| hsa_c | hsa_c |
| irc_0 | irc_0 |
| 0756  | 0718  |
| 84    | 73    |
| hsa_c | hsa_c |
| irc_0 | irc_0 |
| 0758  | 0721  |
| 47    | 06    |
| hsa_c | hsa_c |
| irc_0 | irc_0 |
| 0759  | 0048  |
| 07    | 07    |
| hsa_c | hsa_c |
| irc_0 | irc_0 |
| 0759  | 0721  |
| 32    | 18    |
| hsa_c | hsa_c |
| irc_0 | irc_0 |
| 0759  | 0721  |

|       |       |
|-------|-------|
| 44    | 19    |
| hsa_c | hsa_c |
| irc_0 | irc_0 |
| 0761  | 0721  |
| 49    | 20    |
| hsa_c | hsa_c |
| irc_0 | irc_0 |
| 0761  | 0721  |
| 50    | 21    |
| hsa_c | hsa_c |
| irc_0 | irc_0 |
| 0761  | 0721  |
| 51    | 22    |
| hsa_c | hsa_c |
| irc_0 | irc_0 |
| 0761  | 0721  |
| 92    | 23    |
| hsa_c | hsa_c |
| irc_0 | irc_0 |
| 0764  | 0721  |
| 15    | 24    |
| hsa_c | hsa_c |
| irc_0 | irc_0 |
| 0767  | 0721  |
| 04    | 25    |
| hsa_c | hsa_c |
| irc_0 | irc_0 |
| 0767  | 0721  |
| 05    | 49    |
| hsa_c | hsa_c |
| irc_0 | irc_0 |
| 0767  | 0721  |
| 06    | 52    |
| hsa_c | hsa_c |
| irc_0 | irc_0 |
| 0767  | 0722  |
| 07    | 09    |
| hsa_c | hsa_c |
| irc_0 | irc_0 |
| 0767  | 0722  |
| 85    | 11    |
| hsa_c | hsa_c |
| irc_0 | irc_0 |
| 0767  | 0722  |
| 86    | 12    |
| hsa_c | hsa_c |
| irc_0 | irc_0 |
| 0767  | 0722  |
| 87    | 13    |
| hsa_c | hsa_c |
| irc_0 | irc_0 |
| 0767  | 0722  |
| 88    | 14    |
| hsa_c | hsa_c |

|       |       |
|-------|-------|
| irc_0 | irc_0 |
| 0767  | 0723  |
| 89    | 66    |
| hsa_c | hsa_c |
| irc_0 | irc_0 |
| 0767  | 0723  |
| 90    | 67    |
| hsa_c | hsa_c |
| irc_0 | irc_0 |
| 0767  | 0723  |
| 91    | 68    |
| hsa_c | hsa_c |
| irc_0 | irc_0 |
| 0768  | 0723  |
| 67    | 69    |
| hsa_c | hsa_c |
| irc_0 | irc_0 |
| 0768  | 0086  |
| 68    | 21    |
| hsa_c | hsa_c |
| irc_0 | irc_0 |
| 0768  | 0723  |
| 69    | 82    |
| hsa_c | hsa_c |
| irc_0 | irc_0 |
| 0768  | 0723  |
| 70    | 83    |
| hsa_c | hsa_c |
| irc_0 | irc_0 |
| 0768  | 0723  |
| 71    | 85    |
| hsa_c | hsa_c |
| irc_0 | irc_0 |
| 0768  | 0723  |
| 72    | 86    |
| hsa_c | hsa_c |
| irc_0 | irc_0 |
| 0769  | 0723  |
| 62    | 87    |
| hsa_c | hsa_c |
| irc_0 | irc_0 |
| 0770  | 0723  |
| 28    | 88    |
| hsa_c | hsa_c |
| irc_0 | irc_0 |
| 0770  | 0723  |
| 32    | 89    |
| hsa_c | hsa_c |
| irc_0 | irc_0 |
| 0770  | 0723  |
| 42    | 90    |
| hsa_c | hsa_c |
| irc_0 | irc_0 |
| 0770  | 0723  |
| 47    | 91    |

|       |       |
|-------|-------|
| hsa_c | hsa_c |
| irc_0 | irc_0 |
| 0770  | 0724  |
| 54    | 01    |
| hsa_c | hsa_c |
| irc_0 | irc_0 |
| 0770  | 0724  |
| 58    | 02    |
| hsa_c | hsa_c |
| irc_0 | irc_0 |
| 0770  | 0724  |
| 59    | 03    |
| hsa_c | hsa_c |
| irc_0 | irc_0 |
| 0770  | 0724  |
| 60    | 04    |
| hsa_c | hsa_c |
| irc_0 | irc_0 |
| 0770  | 0724  |
| 94    | 05    |
| hsa_c | hsa_c |
| irc_0 | irc_0 |
| 0772  | 0724  |
| 33    | 10    |
| hsa_c | hsa_c |
| irc_0 | irc_0 |
| 0772  | 0724  |
| 34    | 12    |
| hsa_c | hsa_c |
| irc_0 | irc_0 |
| 0772  | 0724  |
| 66    | 14    |
| hsa_c | hsa_c |
| irc_0 | irc_0 |
| 0772  | 0724  |
| 90    | 15    |
| hsa_c | hsa_c |
| irc_0 | irc_0 |
| 0773  | 0724  |
| 00    | 17    |
| hsa_c | hsa_c |
| irc_0 | irc_0 |
| 0773  | 0724  |
| 01    | 65    |
| hsa_c | hsa_c |
| irc_0 | irc_0 |
| 0773  | 0725  |
| 02    | 09    |
| hsa_c | hsa_c |
| irc_0 | irc_0 |
| 0773  | 0725  |
| 03    | 52    |
| hsa_c | hsa_c |
| irc_0 | irc_0 |
| 0773  | 0725  |



|       |       |
|-------|-------|
| 37    | 53    |
| hsa_c | hsa_c |
| irc_0 | irc_0 |
| 0773  | 0725  |
| 38    | 74    |
| hsa_c | hsa_c |
| irc_0 | irc_0 |
| 0773  | 0725  |
| 39    | 73    |
| hsa_c | hsa_c |
| irc_0 | irc_0 |
| 0773  | 0725  |
| 40    | 85    |
| hsa_c | hsa_c |
| irc_0 | irc_0 |
| 0773  | 0725  |
| 42    | 86    |
| hsa_c | hsa_c |
| irc_0 | irc_0 |
| 0773  | 0726  |
| 43    | 52    |
| hsa_c | hsa_c |
| irc_0 | irc_0 |
| 0773  | 0727  |
| 44    | 04    |
| hsa_c | hsa_c |
| irc_0 | irc_0 |
| 0773  | 0031  |
| 45    | 74    |
| hsa_c | hsa_c |
| irc_0 | irc_0 |
| 0773  | 0038  |
| 46    | 01    |
| hsa_c | hsa_c |
| irc_0 | irc_0 |
| 0773  | 0049  |
| 47    | 32    |
| hsa_c | hsa_c |
| irc_0 | irc_0 |
| 0773  | 0051  |
| 48    | 46    |
| hsa_c | hsa_c |
| irc_0 | irc_0 |
| 0773  | 0074  |
| 25    | 98    |
| hsa_c | hsa_c |
| irc_0 | irc_0 |
| 0773  | 0087  |
| 26    | 23    |
| hsa_c | hsa_c |
| irc_0 | irc_0 |
| 0773  | 0058  |
| 27    | 96    |
| hsa_c |       |

|       |       |
|-------|-------|
| irc_0 | hsa_c |
| 0773  | irc_0 |
| 28    | 0070  |
|       | 25    |
| hsa_c | hsa_c |
| irc_0 | irc_0 |
| 0773  | 0074  |
| 30    | 47    |
| hsa_c | hsa_c |
| irc_0 | irc_0 |
| 0773  | 0728  |
| 31    | 04    |
| hsa_c | hsa_c |
| irc_0 | irc_0 |
| 0773  | 0728  |
| 32    | 27    |
| hsa_c | hsa_c |
| irc_0 | irc_0 |
| 0773  | 0728  |
| 33    | 29    |
| hsa_c | hsa_c |
| irc_0 | irc_0 |
| 0773  | 0051  |
| 34    | 59    |
| hsa_c | hsa_c |
| irc_0 | irc_0 |
| 0773  | 0045  |
| 36    | 45    |
| hsa_c | hsa_c |
| irc_0 | irc_0 |
| 0773  | 0728  |
| 10    | 10    |
| hsa_c | hsa_c |
| irc_0 | irc_0 |
| 0773  | 0728  |
| 11    | 11    |
| hsa_c | hsa_c |
| irc_0 | irc_0 |
| 0773  | 0728  |
| 15    | 13    |
| hsa_c | hsa_c |
| irc_0 | irc_0 |
| 0773  | 0728  |
| 16    | 46    |
| hsa_c | hsa_c |
| irc_0 | irc_0 |
| 0773  | 0729  |
| 18    | 07    |
| hsa_c | hsa_c |
| irc_0 | irc_0 |
| 0773  | 0729  |
| 19    | 64    |
| hsa_c | hsa_c |
| irc_0 | irc_0 |
| 0773  | 0729  |

|       |       |
|-------|-------|
| 20    | 70    |
| hsa_c | hsa_c |
| irc_0 | irc_0 |
| 0773  | 0729  |
| 21    | 71    |
| hsa_c | hsa_c |
| irc_0 | irc_0 |
| 0773  | 0729  |
| 22    | 73    |
| hsa_c | hsa_c |
| irc_0 | irc_0 |
| 0773  | 0729  |
| 24    | 74    |
| hsa_c | hsa_c |
| irc_0 | irc_0 |
| 0774  | 0729  |
| 34    | 75    |
| hsa_c | hsa_c |
| irc_0 | irc_0 |
| 0775  | 0729  |
| 81    | 76    |
| hsa_c | hsa_c |
| irc_0 | irc_0 |
| 0775  | 0729  |
| 82    | 77    |
| hsa_c | hsa_c |
| irc_0 | irc_0 |
| 0776  | 0729  |
| 42    | 79    |
| hsa_c | hsa_c |
| irc_0 | irc_0 |
| 0776  | 0729  |
| 44    | 90    |
| hsa_c | hsa_c |
| irc_0 | irc_0 |
| 0776  | 0068  |
| 47    | 59    |
| hsa_c | hsa_c |
| irc_0 | irc_0 |
| 0776  | 0730  |
| 49    | 10    |
| hsa_c | hsa_c |
| irc_0 | irc_0 |
| 0776  | 0730  |
| 51    | 11    |
| hsa_c | hsa_c |
| irc_0 | irc_0 |
| 0776  | 0730  |
| 52    | 31    |
| hsa_c | hsa_c |
| irc_0 | irc_0 |
| 0776  | 0730  |
| 65    | 33    |
| hsa_c | hsa_c |

|       |       |
|-------|-------|
| irc_0 | irc_0 |
| 0776  | 0730  |
| 66    | 34    |
| hsa_c | hsa_c |
| irc_0 | irc_0 |
| 0776  | 0730  |
| 68    | 42    |
| hsa_c | hsa_c |
| irc_0 | irc_0 |
| 0777  | 0730  |
| 53    | 66    |
| hsa_c | hsa_c |
| irc_0 | irc_0 |
| 0777  | 0731  |
| 55    | 35    |
| hsa_c | hsa_c |
| irc_0 | irc_0 |
| 0778  | 0731  |
| 05    | 60    |
| hsa_c | hsa_c |
| irc_0 | irc_0 |
| 0778  | 0731  |
| 23    | 61    |
| hsa_c | hsa_c |
| irc_0 | irc_0 |
| 0778  | 0732  |
| 98    | 25    |
| hsa_c | hsa_c |
| irc_0 | irc_0 |
| 0779  | 0732  |
| 53    | 27    |
| hsa_c | hsa_c |
| irc_0 | irc_0 |
| 0781  | 0732  |
| 02    | 31    |
| hsa_c | hsa_c |
| irc_0 | irc_0 |
| 0781  | 0732  |
| 12    | 32    |
| hsa_c | hsa_c |
| irc_0 | irc_0 |
| 0781  | 0035  |
| 33    | 61    |
| hsa_c | hsa_c |
| irc_0 | irc_0 |
| 0782  | 0734  |
| 20    | 32    |
| hsa_c | hsa_c |
| irc_0 | irc_0 |
| 0782  | 0734  |
| 21    | 36    |
| hsa_c | hsa_c |
| irc_0 | irc_0 |
| 0782  | 0734  |
| 22    | 42    |

|       |       |
|-------|-------|
| hsa_c | hsa_c |
| irc_0 | irc_0 |
| 0782  | 0734  |
| 99    | 43    |
| hsa_c | hsa_c |
| irc_0 | irc_0 |
| 0783  | 0734  |
| 82    | 45    |
| hsa_c | hsa_c |
| irc_0 | irc_0 |
| 0020  | 0734  |
| 16    | 50    |
| hsa_c | hsa_c |
| irc_0 | irc_0 |
| 0785  | 0734  |
| 72    | 52    |
| hsa_c | hsa_c |
| irc_0 | irc_0 |
| 0785  | 0734  |
| 73    | 53    |
|       |       |
| hsa_c | hsa_c |
| irc_0 | irc_0 |
| 0785  | 0734  |
| 75    | 85    |
|       |       |
| hsa_c | hsa_c |
| irc_0 | irc_0 |
| 0785  | 0734  |
| 76    | 86    |
|       |       |
| hsa_c | hsa_c |
| irc_0 | irc_0 |
| 0785  | 0735  |
| 78    | 41    |
| hsa_c | hsa_c |
| irc_0 | irc_0 |
| 0785  | 0735  |
| 79    | 42    |
| hsa_c | hsa_c |
| irc_0 | irc_0 |
| 0785  | 0735  |
| 82    | 43    |
| hsa_c | hsa_c |
| irc_0 | irc_0 |
| 0785  | 0735  |
| 83    | 44    |
| hsa_c | hsa_c |
| irc_0 | irc_0 |
| 0785  | 0735  |
| 84    | 49    |
| hsa_c | hsa_c |
| irc_0 | irc_0 |
| 0785  | 0735  |
| 85    | 50    |

|       |       |
|-------|-------|
| hsa_c | hsa_c |
| irc_0 | irc_0 |
| 0785  | 0735  |
| 87    | 51    |
| hsa_c | hsa_c |
| irc_0 | irc_0 |
| 0785  | 0735  |
| 88    | 52    |
| hsa_c | hsa_c |
| irc_0 | irc_0 |
| 0785  | 0735  |
| 89    | 54    |
| hsa_c | hsa_c |
| irc_0 | irc_0 |
| 0785  | 0053  |
| 90    | 81    |
| hsa_c | hsa_c |
| irc_0 | irc_0 |
| 0785  | 0736  |
| 91    | 56    |
| hsa_c | hsa_c |
| irc_0 | irc_0 |
| 0785  | 0736  |
| 92    | 57    |
| hsa_c | hsa_c |
| irc_0 | irc_0 |
| 0785  | 0736  |
| 93    | 63    |
| hsa_c | hsa_c |
| irc_0 | irc_0 |
| 0786  | 0736  |
| 41    | 64    |
| hsa_c | hsa_c |
| irc_0 | irc_0 |
| 0786  | 0736  |
| 84    | 65    |
| hsa_c | hsa_c |
| irc_0 | irc_0 |
| 0786  | 0736  |
| 87    | 66    |
| hsa_c | hsa_c |
| irc_0 | irc_0 |
| 0786  | 0736  |
| 88    | 67    |
| hsa_c | hsa_c |
| irc_0 | irc_0 |
| 0790  | 0736  |
| 71    | 68    |
| hsa_c | hsa_c |
| irc_0 | irc_0 |
| 0791  | 0736  |
| 53    | 69    |
| hsa_c | hsa_c |
| irc_0 | irc_0 |
| 0048  | 0736  |

|       |       |
|-------|-------|
| 69    | 70    |
| hsa_c | hsa_c |
| irc_0 | irc_0 |
| 0791  | 0737  |
| 61    | 56    |
| hsa_c | hsa_c |
| irc_0 | irc_0 |
| 0791  | 0737  |
| 62    | 76    |
| hsa_c | hsa_c |
| irc_0 | irc_0 |
| 0791  | 0737  |
| 63    | 77    |
| hsa_c | hsa_c |
| irc_0 | irc_0 |
| 0791  | 0737  |
| 64    | 78    |
| hsa_c | hsa_c |
| irc_0 | irc_0 |
| 0791  | 0738  |
| 65    | 38    |
| hsa_c | hsa_c |
| irc_0 | irc_0 |
| 0073  | 0738  |
| 19    | 39    |
| hsa_c | hsa_c |
| irc_0 | irc_0 |
| 0795  | 0738  |
| 03    | 40    |
| hsa_c | hsa_c |
| irc_0 | irc_0 |
| 0019  | 0738  |
| 71    | 41    |
| hsa_c | hsa_c |
| irc_0 | irc_0 |
| 0038  | 0738  |
| 25    | 42    |
| hsa_c | hsa_c |
| irc_0 | irc_0 |
| 0052  | 0738  |
| 51    | 43    |
| hsa_c | hsa_c |
| irc_0 | irc_0 |
| 0063  | 0738  |
| 07    | 44    |
| hsa_c | hsa_c |
| irc_0 | irc_0 |
| 0089  | 0738  |
| 51    | 45    |
| hsa_c | hsa_c |
| irc_0 | irc_0 |
| 0795  | 0738  |
| 61    | 46    |
| hsa_c | hsa_c |

|       |       |
|-------|-------|
| irc_0 | irc_0 |
| 0795  | 0738  |
| 62    | 47    |
| hsa_c | hsa_c |
| irc_0 | irc_0 |
| 0795  | 0738  |
| 63    | 71    |
| hsa_c | hsa_c |
| irc_0 | irc_0 |
| 0795  | 0739  |
| 64    | 06    |
| hsa_c | hsa_c |
| irc_0 | irc_0 |
| 0797  | 0740  |
| 11    | 12    |
| hsa_c | hsa_c |
| irc_0 | irc_0 |
| 0797  | 0740  |
| 12    | 14    |
| hsa_c | hsa_c |
| irc_0 | irc_0 |
| 0797  | 0740  |
| 19    | 16    |
| hsa_c | hsa_c |
| irc_0 | irc_0 |
| 0797  | 0740  |
| 21    | 17    |
| hsa_c | hsa_c |
| irc_0 | irc_0 |
| 0797  | 0740  |
| 22    | 28    |
| hsa_c | hsa_c |
| irc_0 | irc_0 |
| 0797  | 0740  |
| 26    | 85    |
| hsa_c | hsa_c |
| irc_0 | irc_0 |
| 0797  | 0740  |
| 27    | 87    |
| hsa_c | hsa_c |
| irc_0 | irc_0 |
| 0797  | 0740  |
| 28    | 89    |
| hsa_c | hsa_c |
| irc_0 | irc_0 |
| 0797  | 0741  |
| 29    | 87    |
| hsa_c | hsa_c |
| irc_0 | irc_0 |
| 0797  | 0085  |
| 63    | 95    |
| hsa_c | hsa_c |
| irc_0 | irc_0 |
| 0798  | 0741  |
| 64    | 80    |



|       |       |
|-------|-------|
| hsa_c | hsa_c |
| irc_0 | irc_0 |
| 0798  | 0741  |
| 65    | 84    |
| hsa_c | hsa_c |
| irc_0 | irc_0 |
| 0799  | 0742  |
| 42    | 40    |
| hsa_c | hsa_c |
| irc_0 | irc_0 |
| 0020  | 0742  |
| 33    | 79    |
| hsa_c | hsa_c |
| irc_0 | irc_0 |
| 0802  | 0742  |
| 14    | 80    |
| hsa_c | hsa_c |
| irc_0 | irc_0 |
| 0802  | 0742  |
| 33    | 81    |
| hsa_c | hsa_c |
| irc_0 | irc_0 |
| 0030  | 0742  |
| 86    | 94    |
| hsa_c | hsa_c |
| irc_0 | irc_0 |
| 0074  | 0743  |
| 69    | 29    |
| hsa_c | hsa_c |
| irc_0 | irc_0 |
| 0087  | 0743  |
| 70    | 30    |
| hsa_c | hsa_c |
| irc_0 | irc_0 |
| 0059  | 0743  |
| 79    | 32    |
| hsa_c | hsa_c |
| irc_0 | irc_0 |
| 0064  | 0743  |
| 42    | 34    |
| hsa_c | hsa_c |
| irc_0 | irc_0 |
| 0194  | 0743  |
| 7     | 35    |
| hsa_c | hsa_c |
| irc_0 | irc_0 |
| 0803  | 0743  |
| 55    | 36    |
| hsa_c | hsa_c |
| irc_0 | irc_0 |
| 0803  | 0743  |
| 57    | 54    |
| hsa_c | hsa_c |
| irc_0 | irc_0 |
| 0804  | 0743  |

|       |       |
|-------|-------|
| 48    | 55    |
| hsa_c | hsa_c |
| irc_0 | irc_0 |
| 0804  | 0743  |
| 50    | 56    |
| hsa_c | hsa_c |
| irc_0 | irc_0 |
| 0804  | 0744  |
| 56    | 17    |
| hsa_c | hsa_c |
| irc_0 | irc_0 |
| 0081  | 0744  |
| 67    | 18    |
| hsa_c | hsa_c |
| irc_0 | irc_0 |
| 0033  | 0744  |
| 17    | 19    |
| hsa_c | hsa_c |
| irc_0 | irc_0 |
| 0068  | 0744  |
| 21    | 27    |
| hsa_c | hsa_c |
| irc_0 | irc_0 |
| 0091  | 0744  |
| 29    | 28    |
| hsa_c | hsa_c |
| irc_0 | irc_0 |
| 0063  | 0744  |
| 72    | 20    |
| hsa_c | hsa_c |
| irc_0 | irc_0 |
| 0085  | 0744  |
| 76    | 21    |
| hsa_c | hsa_c |
| irc_0 | irc_0 |
| 0804  | 0744  |
| 78    | 22    |
| hsa_c | hsa_c |
| irc_0 | irc_0 |
| 0804  | 0744  |
| 79    | 23    |
| hsa_c | hsa_c |
| irc_0 | irc_0 |
| 0804  | 0744  |
| 82    | 24    |
| hsa_c | hsa_c |
| irc_0 | irc_0 |
| 0804  | 0744  |
| 85    | 25    |
| hsa_c | hsa_c |
| irc_0 | irc_0 |
| 0804  | 0744  |
| 86    | 47    |
| hsa_c | hsa_c |

|       |       |
|-------|-------|
| irc_0 | irc_0 |
| 0804  | 0744  |
| 87    | 48    |
| hsa_c | hsa_c |
| irc_0 | irc_0 |
| 0804  | 0744  |
| 89    | 49    |
| hsa_c | hsa_c |
| irc_0 | irc_0 |
| 0804  | 0744  |
| 90    | 50    |
| hsa_c | hsa_c |
| irc_0 | irc_0 |
| 0806  | 0744  |
| 61    | 51    |
| hsa_c | hsa_c |
| irc_0 | irc_0 |
| 0806  | 0744  |
| 84    | 52    |
| hsa_c | hsa_c |
| irc_0 | irc_0 |
| 0806  | 0744  |
| 85    | 93    |
| hsa_c | hsa_c |
| irc_0 | irc_0 |
| 0806  | 0744  |
| 86    | 94    |
| hsa_c | hsa_c |
| irc_0 | irc_0 |
| 0067  | 0744  |
| 66    | 95    |
| hsa_c | hsa_c |
| irc_0 | irc_0 |
| 0084  | 0745  |
| 22    | 71    |
| hsa_c | hsa_c |
| irc_0 | irc_0 |
| 0809  | 0745  |
| 16    | 72    |
| hsa_c | hsa_c |
| irc_0 | irc_0 |
| 0809  | 0746  |
| 77    | 95    |
| hsa_c | hsa_c |
| irc_0 | irc_0 |
| 0810  | 0746  |
| 20    | 96    |
| hsa_c | hsa_c |
| irc_0 | irc_0 |
| 0810  | 0746  |
| 30    | 97    |
| hsa_c | hsa_c |
| irc_0 | irc_0 |
| 0811  | 0746  |
| 74    | 98    |

|       |       |
|-------|-------|
| hsa_c | hsa_c |
| irc_0 | irc_0 |
| 0811  | 0746  |
| 79    | 99    |
| hsa_c | hsa_c |
| irc_0 | irc_0 |
| 0812  | 0747  |
| 27    | 00    |
| hsa_c | hsa_c |
| irc_0 | irc_0 |
| 0812  | 0748  |
| 28    | 01    |
| hsa_c | hsa_c |
| irc_0 | irc_0 |
| 0812  | 0748  |
| 29    | 03    |
| hsa_c | hsa_c |
| irc_0 | irc_0 |
| 0812  | 0748  |
| 30    | 04    |
| hsa_c | hsa_c |
| irc_0 | irc_0 |
| 0812  | 0748  |
| 31    | 38    |
| hsa_c | hsa_c |
| irc_0 | irc_0 |
| 0812  | 0748  |
| 32    | 56    |
| hsa_c | hsa_c |
| irc_0 | irc_0 |
| 0812  | 0749  |
| 33    | 01    |
| hsa_c | hsa_c |
| irc_0 | irc_0 |
| 0812  | 0749  |
| 34    | 08    |
| hsa_c | hsa_c |
| irc_0 | irc_0 |
| 0812  | 0749  |
| 35    | 09    |
| hsa_c | hsa_c |
| irc_0 | irc_0 |
| 0813  | 0749  |
| 18    | 11    |
| hsa_c | hsa_c |
| irc_0 | irc_0 |
| 0210  | 0749  |
| 3     | 12    |
| hsa_c | hsa_c |
| irc_0 | irc_0 |
| 0815  | 0749  |
| 26    | 18    |
| hsa_c | hsa_c |
| irc_0 | irc_0 |
| 0815  | 0749  |

|       |       |
|-------|-------|
| 29    | 19    |
| hsa_c | hsa_c |
| irc_0 | irc_0 |
| 0076  | 0749  |
| 39    | 22    |
| hsa_c | hsa_c |
| irc_0 | irc_0 |
| 0118  | 0749  |
| 2     | 23    |
| hsa_c | hsa_c |
| irc_0 | irc_0 |
| 0817  | 0749  |
| 55    | 24    |
| hsa_c | hsa_c |
| irc_0 | irc_0 |
| 0817  | 0027  |
| 56    | 45    |
| hsa_c | hsa_c |
| irc_0 | irc_0 |
| 0817  | 0036  |
| 57    | 96    |
| hsa_c | hsa_c |
| irc_0 | irc_0 |
| 0817  | 0045  |
| 59    | 27    |
| hsa_c | hsa_c |
| irc_0 | irc_0 |
| 0817  | 0749  |
| 60    | 74    |
| hsa_c | hsa_c |
| irc_0 | irc_0 |
| 0817  | 0749  |
| 61    | 75    |
| hsa_c | hsa_c |
| irc_0 | irc_0 |
| 0818  | 0749  |
| 15    | 76    |
| hsa_c | hsa_c |
| irc_0 | irc_0 |
| 0818  | 0749  |
| 76    | 79    |
| hsa_c | hsa_c |
| irc_0 | irc_0 |
| 0039  | 0749  |
| 32    | 80    |
| hsa_c | hsa_c |
| irc_0 | irc_0 |
| 0819  | 0749  |
| 07    | 81    |
| hsa_c | hsa_c |
| irc_0 | irc_0 |
| 0819  | 0749  |
| 18    | 82    |
| hsa_c | hsa_c |

|       |       |
|-------|-------|
| irc_0 | irc_0 |
| 0819  | 0750  |
| 25    | 63    |
| hsa_c | hsa_c |
| irc_0 | irc_0 |
| 0819  | 0750  |
| 26    | 64    |
| hsa_c | hsa_c |
| irc_0 | irc_0 |
| 0819  | 0021  |
| 34    | 71    |
| hsa_c | hsa_c |
| irc_0 | irc_0 |
| 0819  | 0750  |
| 38    | 92    |
| hsa_c | hsa_c |
| irc_0 | irc_0 |
| 0819  | 0751  |
| 39    | 47    |
| hsa_c | hsa_c |
| irc_0 | irc_0 |
| 0819  | 0751  |
| 40    | 87    |
| hsa_c | hsa_c |
| irc_0 | irc_0 |
| 0819  | 0751  |
| 41    | 88    |
| hsa_c | hsa_c |
| irc_0 | irc_0 |
| 0819  | 0751  |
| 42    | 89    |
| hsa_c | hsa_c |
| irc_0 | irc_0 |
| 0819  | 0751  |
| 68    | 90    |
| hsa_c | hsa_c |
| irc_0 | irc_0 |
| 0819  | 0751  |
| 69    | 91    |
| hsa_c | hsa_c |
| irc_0 | irc_0 |
| 0819  | 0753  |
| 70    | 05    |
| hsa_c | hsa_c |
| irc_0 | irc_0 |
| 0820  | 0753  |
| 04    | 06    |
| hsa_c | hsa_c |
| irc_0 | irc_0 |
| 0820  | 0753  |
| 05    | 07    |
| hsa_c | hsa_c |
| irc_0 | irc_0 |
| 0820  | 0753  |
| 06    | 71    |

|       |       |
|-------|-------|
| hsa_c | hsa_c |
| irc_0 | irc_0 |
| 0820  | 0754  |
| 07    | 07    |
| hsa_c | hsa_c |
| irc_0 | irc_0 |
| 0062  | 0754  |
| 52    | 08    |
| hsa_c | hsa_c |
| irc_0 | irc_0 |
| 0821  | 0754  |
| 03    | 66    |
| hsa_c | hsa_c |
| irc_0 | irc_0 |
| 0821  | 0754  |
| 07    | 67    |
| hsa_c | hsa_c |
| irc_0 | irc_0 |
| 0821  | 0754  |
| 08    | 68    |
| hsa_c | hsa_c |
| irc_0 | irc_0 |
| 0821  | 0754  |
| 11    | 69    |
| hsa_c | hsa_c |
| irc_0 | irc_0 |
| 0821  | 0755  |
| 12    | 00    |
| hsa_c | hsa_c |
| irc_0 | irc_0 |
| 0821  | 0755  |
| 14    | 49    |
| hsa_c | hsa_c |
| irc_0 | irc_0 |
| 0821  | 0756  |
| 15    | 40    |
| hsa_c | hsa_c |
| irc_0 | irc_0 |
| 0821  | 0756  |
| 18    | 76    |
| hsa_c | hsa_c |
| irc_0 | irc_0 |
| 0821  | 0073  |
| 19    | 70    |
| hsa_c | hsa_c |
| irc_0 | irc_0 |
| 0821  | 0757  |
| 20    | 02    |
| hsa_c | hsa_c |
| irc_0 | irc_0 |
| 0821  | 0757  |
| 21    | 03    |
| hsa_c | hsa_c |
| irc_0 | irc_0 |
| 0821  | 0757  |

|       |       |
|-------|-------|
| 22    | 04    |
| hsa_c | hsa_c |
| irc_0 | irc_0 |
| 0821  | 0757  |
| 23    | 05    |
| hsa_c | hsa_c |
| irc_0 | irc_0 |
| 0821  | 0757  |
| 25    | 06    |
| hsa_c | hsa_c |
| irc_0 | irc_0 |
| 0821  | 0757  |
| 26    | 07    |
| hsa_c | hsa_c |
| irc_0 | irc_0 |
| 0821  | 0757  |
| 27    | 10    |
| hsa_c | hsa_c |
| irc_0 | irc_0 |
| 0821  | 0757  |
| 28    | 11    |
| hsa_c | hsa_c |
| irc_0 | irc_0 |
| 0821  | 0757  |
| 29    | 14    |
| hsa_c | hsa_c |
| irc_0 | irc_0 |
| 0821  | 0757  |
| 30    | 85    |
| hsa_c | hsa_c |
| irc_0 | irc_0 |
| 0821  | 0758  |
| 32    | 12    |
| hsa_c | hsa_c |
| irc_0 | irc_0 |
| 0821  | 0758  |
| 33    | 15    |
| hsa_c | hsa_c |
| irc_0 | irc_0 |
| 0821  | 0074  |
| 34    | 4     |
| hsa_c | hsa_c |
| irc_0 | irc_0 |
| 0821  | 0758  |
| 35    | 93    |
| hsa_c | hsa_c |
| irc_0 | irc_0 |
| 0821  | 0758  |
| 36    | 95    |
| hsa_c | hsa_c |
| irc_0 | irc_0 |
| 0821  | 0759  |
| 37    | 21    |
| hsa_c | hsa_c |



|       |       |
|-------|-------|
| irc_0 | irc_0 |
| 0821  | 0759  |
| 38    | 22    |
| hsa_c | hsa_c |
| irc_0 | irc_0 |
| 0821  | 0759  |
| 39    | 23    |
| hsa_c | hsa_c |
| irc_0 | irc_0 |
| 0821  | 0759  |
| 40    | 38    |
| hsa_c | hsa_c |
| irc_0 | irc_0 |
| 0821  | 0759  |
| 41    | 43    |
| hsa_c | hsa_c |
| irc_0 | irc_0 |
| 0821  | 0759  |
| 42    | 53    |
| hsa_c | hsa_c |
| irc_0 | irc_0 |
| 0821  | 0759  |
| 43    | 60    |
| hsa_c | hsa_c |
| irc_0 | irc_0 |
| 0821  | 0759  |
| 44    | 74    |
| hsa_c | hsa_c |
| irc_0 | irc_0 |
| 0821  | 0759  |
| 45    | 75    |
| hsa_c | hsa_c |
| irc_0 | irc_0 |
| 0821  | 0759  |
| 46    | 76    |
| hsa_c | hsa_c |
| irc_0 | irc_0 |
| 0821  | 0759  |
| 47    | 77    |
| hsa_c | hsa_c |
| irc_0 | irc_0 |
| 0823  | 0759  |
| 69    | 78    |
| hsa_c | hsa_c |
| irc_0 | irc_0 |
| 0823  | 0759  |
| 71    | 80    |
| hsa_c | hsa_c |
| irc_0 | irc_0 |
| 0823  | 0759  |
| 72    | 83    |
| hsa_c | hsa_c |
| irc_0 | irc_0 |
| 0823  | 0759  |
| 73    | 84    |

|       |       |
|-------|-------|
| hsa_c | hsa_c |
| irc_0 | irc_0 |
| 0823  | 0759  |
| 74    | 85    |
| hsa_c | hsa_c |
| irc_0 | irc_0 |
| 0823  | 0759  |
| 75    | 86    |
| hsa_c | hsa_c |
| irc_0 | irc_0 |
| 0823  | 0760  |
| 76    | 42    |
| hsa_c | hsa_c |
| irc_0 | irc_0 |
| 0825  | 0760  |
| 61    | 50    |
| hsa_c | hsa_c |
| irc_0 | irc_0 |
| 0825  | 0760  |
| 62    | 51    |
| hsa_c | hsa_c |
| irc_0 | irc_0 |
| 0826  | 0761  |
| 21    | 20    |
| hsa_c | hsa_c |
| irc_0 | irc_0 |
| 0826  | 0761  |
| 65    | 21    |
| hsa_c | hsa_c |
| irc_0 | irc_0 |
| 0826  | 0761  |
| 66    | 22    |
| hsa_c | hsa_c |
| irc_0 | irc_0 |
| 0827  | 0761  |
| 01    | 94    |
| hsa_c | hsa_c |
| irc_0 | irc_0 |
| 0827  | 0054  |
| 02    | 07    |
| hsa_c | hsa_c |
| irc_0 | irc_0 |
| 0827  | 0762  |
| 03    | 93    |
| hsa_c | hsa_c |
| irc_0 | irc_0 |
| 0213  | 0762  |
| 5     | 94    |
| hsa_c | hsa_c |
| irc_0 | irc_0 |
| 0827  | 0763  |
| 85    | 29    |
| hsa_c | hsa_c |
| irc_0 | irc_0 |
| 0827  | 0763  |

|       |       |
|-------|-------|
| 86    | 72    |
| hsa_c | hsa_c |
| irc_0 | irc_0 |
| 0828  | 0765  |
| 43    | 13    |
| hsa_c | hsa_c |
| irc_0 | irc_0 |
| 0828  | 0765  |
| 99    | 14    |
| hsa_c | hsa_c |
| irc_0 | irc_0 |
| 0830  | 0765  |
| 91    | 15    |
| hsa_c | hsa_c |
| irc_0 | irc_0 |
| 0830  | 0765  |
| 95    | 16    |
| hsa_c | hsa_c |
| irc_0 | irc_0 |
| 0831  | 0765  |
| 04    | 17    |
| hsa_c | hsa_c |
| irc_0 | irc_0 |
| 0831  | 0765  |
| 20    | 18    |
| hsa_c | hsa_c |
| irc_0 | irc_0 |
| 0831  | 0765  |
| 70    | 19    |
| hsa_c | hsa_c |
| irc_0 | irc_0 |
| 0831  | 0765  |
| 74    | 20    |
| hsa_c | hsa_c |
| irc_0 | irc_0 |
| 0831  | 0765  |
| 81    | 32    |
| hsa_c | hsa_c |
| irc_0 | irc_0 |
| 0832  | 0765  |
| 03    | 33    |
| hsa_c | hsa_c |
| irc_0 | irc_0 |
| 0834  | 0765  |
| 69    | 40    |
| hsa_c | hsa_c |
| irc_0 | irc_0 |
| 0834  | 0765  |
| 71    | 42    |
| hsa_c | hsa_c |
| irc_0 | irc_0 |
| 0834  | 0765  |
| 72    | 43    |
| hsa_c | hsa_c |

|       |       |
|-------|-------|
| irc_0 | irc_0 |
| 0835  | 0765  |
| 76    | 44    |
| hsa_c | hsa_c |
| irc_0 | irc_0 |
| 0835  | 0765  |
| 75    | 45    |
| hsa_c | hsa_c |
| irc_0 | irc_0 |
| 0835  | 0765  |
| 74    | 46    |
| hsa_c | hsa_c |
| irc_0 | irc_0 |
| 0835  | 0765  |
| 77    | 47    |
| hsa_c | hsa_c |
| irc_0 | irc_0 |
| 0021  | 0765  |
| 31    | 49    |
| hsa_c | hsa_c |
| irc_0 | irc_0 |
| 0837  | 0765  |
| 43    | 50    |
| hsa_c | hsa_c |
| irc_0 | irc_0 |
| 0837  | 0765  |
| 45    | 51    |
| hsa_c | hsa_c |
| irc_0 | irc_0 |
| 0837  | 0766  |
| 49    | 08    |
| hsa_c | hsa_c |
| irc_0 | irc_0 |
| 0837  | 0766  |
| 51    | 29    |
| hsa_c | hsa_c |
| irc_0 | irc_0 |
| 0837  | 0768  |
| 52    | 62    |
| hsa_c | hsa_c |
| irc_0 | irc_0 |
| 0837  | 0768  |
| 96    | 67    |
| hsa_c | hsa_c |
| irc_0 | irc_0 |
| 0837  | 0770  |
| 97    | 71    |
| hsa_c | hsa_c |
| irc_0 | irc_0 |
| 0838  | 0771  |
| 00    | 10    |
| hsa_c | hsa_c |
| irc_0 | irc_0 |
| 0838  | 0020  |
| 09    | 41    |

|       |       |
|-------|-------|
| hsa_c | hsa_c |
| irc_0 | irc_0 |
| 0839  | 0771  |
| 42    | 73    |
| hsa_c | hsa_c |
| irc_0 | irc_0 |
| 0839  | 0771  |
| 68    | 75    |
| hsa_c | hsa_c |
| irc_0 | irc_0 |
| 0840  | 0771  |
| 59    | 77    |
| hsa_c | hsa_c |
| irc_0 | irc_0 |
| 0840  | 0771  |
| 60    | 78    |
| hsa_c | hsa_c |
| irc_0 | irc_0 |
| 0840  | 0771  |
| 61    | 79    |
| hsa_c | hsa_c |
| irc_0 | irc_0 |
| 0840  | 0772  |
| 67    | 02    |
| hsa_c | hsa_c |
| irc_0 | irc_0 |
| 0841  | 0772  |
| 86    | 04    |
| hsa_c | hsa_c |
| irc_0 | irc_0 |
| 0841  | 0772  |
| 87    | 22    |
| hsa_c | hsa_c |
| irc_0 | irc_0 |
| 0846  | 0772  |
| 47    | 23    |
| hsa_c | hsa_c |
| irc_0 | irc_0 |
| 0846  | 0772  |
| 85    | 89    |
| hsa_c | hsa_c |
| irc_0 | irc_0 |
| 0847  | 0773  |
| 91    | 82    |
| hsa_c | hsa_c |
| irc_0 | irc_0 |
| 0847  | 0773  |
| 93    | 85    |
| hsa_c | hsa_c |
| irc_0 | irc_0 |
| 0847  | 0773  |
| 94    | 88    |
| hsa_c | hsa_c |
| irc_0 | irc_0 |
| 0848  | 0774  |

|       |       |
|-------|-------|
| 45    | 12    |
| hsa_c | hsa_c |
| irc_0 | irc_0 |
| 0848  | 0774  |
| 47    | 13    |
| hsa_c | hsa_c |
| irc_0 | irc_0 |
| 0848  | 0083  |
| 48    | 21    |
| hsa_c | hsa_c |
| irc_0 | irc_0 |
| 0848  | 0774  |
| 49    | 41    |
| hsa_c | hsa_c |
| irc_0 | irc_0 |
| 0848  | 0774  |
| 50    | 44    |
| hsa_c | hsa_c |
| irc_0 | irc_0 |
| 0848  | 0774  |
| 51    | 45    |
| hsa_c | hsa_c |
| irc_0 | irc_0 |
| 0848  | 0774  |
| 52    | 46    |
| hsa_c | hsa_c |
| irc_0 | irc_0 |
| 0848  | 0774  |
| 53    | 51    |
| hsa_c | hsa_c |
| irc_0 | irc_0 |
| 0059  | 0774  |
| 34    | 52    |
| hsa_c | hsa_c |
| irc_0 | irc_0 |
| 0851  | 0774  |
| 79    | 53    |
| hsa_c | hsa_c |
| irc_0 | irc_0 |
| 0853  | 0774  |
| 37    | 54    |
| hsa_c | hsa_c |
| irc_0 | irc_0 |
| 0854  | 0774  |
| 55    | 58    |
| hsa_c | hsa_c |
| irc_0 | irc_0 |
| 0854  | 0775  |
| 57    | 07    |
| hsa_c | hsa_c |
| irc_0 | irc_0 |
| 0854  | 0775  |
| 61    | 08    |
| hsa_c | hsa_c |

|       |       |
|-------|-------|
| irc_0 | irc_0 |
| 0854  | 0775  |
| 62    | 25    |
| hsa_c | hsa_c |
| irc_0 | irc_0 |
| 0854  | 0775  |
| 64    | 29    |
| hsa_c | hsa_c |
| irc_0 | irc_0 |
| 0854  | 0775  |
| 66    | 93    |
| hsa_c | hsa_c |
| irc_0 | irc_0 |
| 0854  | 0775  |
| 67    | 96    |
| hsa_c | hsa_c |
| irc_0 | irc_0 |
| 0854  | 0775  |
| 68    | 98    |
| hsa_c | hsa_c |
| irc_0 | irc_0 |
| 0854  | 0775  |
| 69    | 99    |
| hsa_c | hsa_c |
| irc_0 | irc_0 |
| 0854  | 0776  |
| 83    | 00    |
| hsa_c | hsa_c |
| irc_0 | irc_0 |
| 0854  | 0776  |
| 84    | 42    |
| hsa_c | hsa_c |
| irc_0 | irc_0 |
| 0854  | 0776  |
| 89    | 44    |
| hsa_c | hsa_c |
| irc_0 | irc_0 |
| 0855  | 0776  |
| 41    | 47    |
| hsa_c | hsa_c |
| irc_0 | irc_0 |
| 0064  | 0776  |
| 47    | 49    |
| hsa_c | hsa_c |
| irc_0 | irc_0 |
| 0856  | 0776  |
| 45    | 51    |
| hsa_c | hsa_c |
| irc_0 | irc_0 |
| 0857  | 0776  |
| 08    | 52    |
| hsa_c | hsa_c |
| irc_0 | irc_0 |
| 0857  | 0776  |
| 09    | 72    |

|       |       |
|-------|-------|
| hsa_c | hsa_c |
| irc_0 | irc_0 |
| 0857  | 0776  |
| 10    | 73    |
| hsa_c | hsa_c |
| irc_0 | irc_0 |
| 0020  | 0776  |
| 62    | 74    |
| hsa_c | hsa_c |
| irc_0 | irc_0 |
| 0052  | 0776  |
| 59    | 78    |
| hsa_c | hsa_c |
| irc_0 | irc_0 |
| 0857  | 0776  |
| 75    | 79    |
| hsa_c | hsa_c |
| irc_0 | irc_0 |
| 0857  | 0776  |
| 77    | 80    |
| hsa_c | hsa_c |
| irc_0 | irc_0 |
| 0857  | 0776  |
| 79    | 81    |
| hsa_c | hsa_c |
| irc_0 | irc_0 |
| 0857  | 0777  |
| 80    | 65    |
| hsa_c | hsa_c |
| irc_0 | irc_0 |
| 0857  | 0777  |
| 81    | 66    |
| hsa_c | hsa_c |
| irc_0 | irc_0 |
| 0857  | 0778  |
| 82    | 05    |
| hsa_c | hsa_c |
| irc_0 | irc_0 |
| 0857  | 0778  |
| 83    | 06    |
| hsa_c | hsa_c |
| irc_0 | irc_0 |
| 0857  | 0778  |
| 84    | 07    |
| hsa_c | hsa_c |
| irc_0 | irc_0 |
| 0857  | 0778  |
| 85    | 08    |
| hsa_c | hsa_c |
| irc_0 | irc_0 |
| 0858  | 0779  |
| 72    | 00    |
| hsa_c | hsa_c |
| irc_0 | irc_0 |
| 0858  | 0779  |



|       |       |
|-------|-------|
| 73    | 59    |
| hsa_c | hsa_c |
| irc_0 | irc_0 |
| 0858  | 0779  |
| 74    | 60    |
| hsa_c | hsa_c |
| irc_0 | irc_0 |
| 0858  | 0779  |
| 75    | 61    |
| hsa_c | hsa_c |
| irc_0 | irc_0 |
| 0858  | 0779  |
| 76    | 62    |
| hsa_c | hsa_c |
| irc_0 | irc_0 |
| 0858  | 0779  |
| 97    | 63    |
| hsa_c | hsa_c |
| irc_0 | irc_0 |
| 0858  | 0779  |
| 98    | 64    |
| hsa_c | hsa_c |
| irc_0 | irc_0 |
| 0860  | 0779  |
| 34    | 65    |
| hsa_c | hsa_c |
| irc_0 | irc_0 |
| 0860  | 0060  |
| 36    | 71    |
| hsa_c | hsa_c |
| irc_0 | irc_0 |
| 0860  | 0780  |
| 38    | 31    |
| hsa_c | hsa_c |
| irc_0 | irc_0 |
| 0860  | 0780  |
| 39    | 49    |
| hsa_c | hsa_c |
| irc_0 | irc_0 |
| 0861  | 0780  |
| 79    | 65    |
| hsa_c | hsa_c |
| irc_0 | irc_0 |
| 0861  | 0780  |
| 80    | 66    |
| hsa_c | hsa_c |
| irc_0 | irc_0 |
| 0861  | 0780  |
| 81    | 68    |
| hsa_c | hsa_c |
| irc_0 | irc_0 |
| 0861  | 0780  |
| 82    | 69    |
| hsa_c | hsa_c |

|       |       |
|-------|-------|
| irc_0 | irc_0 |
| 0861  | 0780  |
| 97    | 70    |
| hsa_c | hsa_c |
| irc_0 | irc_0 |
| 0861  | 0780  |
| 98    | 71    |
| hsa_c | hsa_c |
| irc_0 | irc_0 |
| 0861  | 0781  |
| 99    | 55    |
| hsa_c | hsa_c |
| irc_0 | irc_0 |
| 0862  | 0781  |
| 43    | 56    |
| hsa_c | hsa_c |
| irc_0 | irc_0 |
| 0862  | 0781  |
| 44    | 65    |
| hsa_c | hsa_c |
| irc_0 | irc_0 |
| 0058  | 0781  |
| 90    | 66    |
| hsa_c | hsa_c |
| irc_0 | irc_0 |
| 0862  | 0781  |
| 89    | 70    |
| hsa_c | hsa_c |
| irc_0 | irc_0 |
| 0862  | 0781  |
| 90    | 74    |
| hsa_c | hsa_c |
| irc_0 | irc_0 |
| 0866  | 0781  |
| 16    | 77    |
| hsa_c | hsa_c |
| irc_0 | irc_0 |
| 0866  | 0781  |
| 17    | 79    |
| hsa_c | hsa_c |
| irc_0 | irc_0 |
| 0866  | 0781  |
| 18    | 80    |
| hsa_c | hsa_c |
| irc_0 | irc_0 |
| 0866  | 0781  |
| 19    | 81    |
| hsa_c | hsa_c |
| irc_0 | irc_0 |
| 0866  | 0782  |
| 20    | 62    |
| hsa_c | hsa_c |
| irc_0 | irc_0 |
| 0866  | 0783  |
| 21    | 12    |

|       |       |
|-------|-------|
| hsa_c | hsa_c |
| irc_0 | irc_0 |
| 0866  | 0783  |
| 32    | 13    |
| hsa_c | hsa_c |
| irc_0 | irc_0 |
| 0866  | 0783  |
| 33    | 38    |
| hsa_c | hsa_c |
| irc_0 | irc_0 |
| 0866  | 0783  |
| 34    | 41    |
| hsa_c | hsa_c |
| irc_0 | irc_0 |
| 0866  | 0783  |
| 35    | 42    |
| hsa_c | hsa_c |
| irc_0 | irc_0 |
| 0866  | 0783  |
| 36    | 57    |
| hsa_c | hsa_c |
| irc_0 | irc_0 |
| 0866  | 0783  |
| 39    | 58    |
| hsa_c | hsa_c |
| irc_0 | irc_0 |
| 0866  | 0783  |
| 42    | 59    |
| hsa_c | hsa_c |
| irc_0 | irc_0 |
| 0866  | 0783  |
| 43    | 60    |
| hsa_c | hsa_c |
| irc_0 | irc_0 |
| 0870  | 0783  |
| 10    | 82    |
| hsa_c | hsa_c |
| irc_0 | irc_0 |
| 0043  | 0030  |
| 98    | 04    |
| hsa_c | hsa_c |
| irc_0 | irc_0 |
| 0870  | 0784  |
| 40    | 37    |
| hsa_c | hsa_c |
| irc_0 | irc_0 |
| 0870  | 0784  |
| 41    | 38    |
| hsa_c | hsa_c |
| irc_0 | irc_0 |
| 0870  | 0784  |
| 44    | 39    |
| hsa_c | hsa_c |
| irc_0 | irc_0 |
| 0870  | 0785  |

|       |       |
|-------|-------|
| 46    | 73    |
| hsa_c | hsa_c |
| irc_0 | irc_0 |
| 0870  | 0785  |
| 47    | 75    |
| hsa_c | hsa_c |
| irc_0 | irc_0 |
| 0870  | 0785  |
| 48    | 76    |
| hsa_c | hsa_c |
| irc_0 | irc_0 |
| 0870  | 0785  |
| 50    | 78    |
| hsa_c | hsa_c |
| irc_0 | irc_0 |
| 0870  | 0785  |
| 51    | 79    |
| hsa_c | hsa_c |
| irc_0 | irc_0 |
| 0870  | 0785  |
| 52    | 82    |
| hsa_c | hsa_c |
| irc_0 | irc_0 |
| 0870  | 0785  |
| 53    | 84    |
| hsa_c | hsa_c |
| irc_0 | irc_0 |
| 0870  | 0785  |
| 54    | 85    |
| hsa_c | hsa_c |
| irc_0 | irc_0 |
| 0870  | 0785  |
| 55    | 87    |
| hsa_c | hsa_c |
| irc_0 | irc_0 |
| 0870  | 0785  |
| 56    | 88    |
| hsa_c | hsa_c |
| irc_0 | irc_0 |
| 0871  | 0786  |
| 54    | 03    |
| hsa_c | hsa_c |
| irc_0 | irc_0 |
| 0871  | 0786  |
| 55    | 41    |
| hsa_c | hsa_c |
| irc_0 | irc_0 |
| 0871  | 0786  |
| 56    | 47    |
| hsa_c | hsa_c |
| irc_0 | irc_0 |
| 0871  | 0786  |
| 57    | 84    |
| hsa_c | hsa_c |

|       |       |
|-------|-------|
| irc_0 | irc_0 |
| 0871  | 0787  |
| 88    | 69    |
| hsa_c | hsa_c |
| irc_0 | irc_0 |
| 0871  | 0787  |
| 94    | 70    |
| hsa_c | hsa_c |
| irc_0 | irc_0 |
| 0871  | 0787  |
| 95    | 71    |
| hsa_c | hsa_c |
| irc_0 | irc_0 |
| 0872  | 0787  |
| 13    | 73    |
| hsa_c | hsa_c |
| irc_0 | irc_0 |
| 0872  | 0790  |
| 36    | 51    |
| hsa_c | hsa_c |
| irc_0 | irc_0 |
| 0872  | 0790  |
| 37    | 52    |
| hsa_c | hsa_c |
| irc_0 | irc_0 |
| 0872  | 0790  |
| 38    | 53    |
| hsa_c | hsa_c |
| irc_0 | irc_0 |
| 0872  | 0790  |
| 51    | 57    |
| hsa_c | hsa_c |
| irc_0 | irc_0 |
| 0872  | 0790  |
| 52    | 58    |
| hsa_c | hsa_c |
| irc_0 | irc_0 |
| 0872  | 0790  |
| 53    | 59    |
| hsa_c | hsa_c |
| irc_0 | irc_0 |
| 0080  | 0790  |
| 38    | 60    |
| hsa_c | hsa_c |
| irc_0 | irc_0 |
| 0873  | 0790  |
| 42    | 61    |
| hsa_c | hsa_c |
| irc_0 | irc_0 |
| 0873  | 0171  |
| 43    | 7     |
| hsa_c | hsa_c |
| irc_0 | irc_0 |
| 0873  | 0790  |
| 44    | 90    |

|       |       |
|-------|-------|
| hsa_c | hsa_c |
| irc_0 | irc_0 |
| 0873  | 0791  |
| 45    | 07    |
| hsa_c | hsa_c |
| irc_0 | irc_0 |
| 0873  | 0791  |
| 46    | 09    |
| hsa_c | hsa_c |
| irc_0 | irc_0 |
| 0034  | 0791  |
| 53    | 11    |
| hsa_c | hsa_c |
| irc_0 | irc_0 |
| 0873  | 0791  |
| 63    | 12    |
| hsa_c | hsa_c |
| irc_0 | irc_0 |
| 0071  | 0791  |
| 62    | 13    |
| hsa_c | hsa_c |
| irc_0 | irc_0 |
| 0873  | 0791  |
| 82    | 14    |
| hsa_c | hsa_c |
| irc_0 | irc_0 |
| 0873  | 0791  |
| 83    | 15    |
| hsa_c | hsa_c |
| irc_0 | irc_0 |
| 0873  | 0791  |
| 84    | 16    |
| hsa_c | hsa_c |
| irc_0 | irc_0 |
| 0873  | 0791  |
| 86    | 42    |
| hsa_c | hsa_c |
| irc_0 | irc_0 |
| 0873  | 0791  |
| 87    | 50    |
| hsa_c | hsa_c |
| irc_0 | irc_0 |
| 0873  | 0049  |
| 88    | 61    |
| hsa_c | hsa_c |
| irc_0 | irc_0 |
| 0099  | 0073  |
| 9     | 19    |
| hsa_c | hsa_c |
| irc_0 | irc_0 |
| 0058  | 0792  |
| 26    | 64    |
| hsa_c | hsa_c |
| irc_0 | irc_0 |
| 0065  | 0792  |

|       |       |
|-------|-------|
| 70    | 65    |
| hsa_c | hsa_c |
| irc_0 | irc_0 |
| 0027  | 0792  |
| 94    | 66    |
| hsa_c | hsa_c |
| irc_0 | irc_0 |
| 0070  | 0792  |
| 60    | 67    |
| hsa_c | hsa_c |
| irc_0 | irc_0 |
| 0875  | 0792  |
| 31    | 69    |
| hsa_c | hsa_c |
| irc_0 | irc_0 |
| 0875  | 0792  |
| 32    | 70    |
| hsa_c | hsa_c |
| irc_0 | irc_0 |
| 0875  | 0792  |
| 33    | 71    |
| hsa_c | hsa_c |
| irc_0 | irc_0 |
| 0875  | 0792  |
| 34    | 72    |
| hsa_c | hsa_c |
| irc_0 | irc_0 |
| 0875  | 0792  |
| 35    | 73    |
| hsa_c | hsa_c |
| irc_0 | irc_0 |
| 0875  | 0065  |
| 36    | 74    |
| hsa_c | hsa_c |
| irc_0 | irc_0 |
| 0875  | 0792  |
| 37    | 84    |
| hsa_c | hsa_c |
| irc_0 | irc_0 |
| 0875  | 0792  |
| 38    | 85    |
| hsa_c | hsa_c |
| irc_0 | irc_0 |
| 0875  | 0793  |
| 41    | 31    |
| hsa_c | hsa_c |
| irc_0 | irc_0 |
| 0875  | 0793  |
| 42    | 38    |
| hsa_c | hsa_c |
| irc_0 | irc_0 |
| 0875  | 0793  |
| 43    | 39    |
| hsa_c | hsa_c |

|       |       |
|-------|-------|
| irc_0 | irc_0 |
| 0875  | 0793  |
| 44    | 67    |
| hsa_c | hsa_c |
| irc_0 | irc_0 |
| 0875  | 0795  |
| 47    | 02    |
| hsa_c | hsa_c |
| irc_0 | irc_0 |
| 0875  | 0794  |
| 48    | 97    |
| hsa_c | hsa_c |
| irc_0 | irc_0 |
| 0875  | 0046  |
| 49    | 71    |
| hsa_c | hsa_c |
| irc_0 | irc_0 |
| 0875  | 0055  |
| 50    | 19    |
| hsa_c | hsa_c |
| irc_0 | irc_0 |
| 0875  | 0795  |
| 51    | 07    |
| hsa_c | hsa_c |
| irc_0 | irc_0 |
| 0875  | 0795  |
| 52    | 09    |
| hsa_c | hsa_c |
| irc_0 | irc_0 |
| 0030  | 0795  |
| 92    | 10    |
| hsa_c | hsa_c |
| irc_0 | irc_0 |
| 0875  | 0795  |
| 67    | 12    |
| hsa_c | hsa_c |
| irc_0 | irc_0 |
| 0875  | 0795  |
| 68    | 13    |
| hsa_c | hsa_c |
| irc_0 | irc_0 |
| 0875  | 0795  |
| 69    | 14    |
| hsa_c | hsa_c |
| irc_0 | irc_0 |
| 0875  | 0795  |
| 70    | 15    |
| hsa_c | hsa_c |
| irc_0 | irc_0 |
| 0875  | 0795  |
| 71    | 17    |
| hsa_c | hsa_c |
| irc_0 | irc_0 |
| 0875  | 0795  |
| 72    | 33    |



|       |       |
|-------|-------|
| hsa_c | hsa_c |
| irc_0 | irc_0 |
| 0875  | 0795  |
| 73    | 78    |
| hsa_c | hsa_c |
| irc_0 | irc_0 |
| 0087  | 0795  |
| 20    | 79    |
| hsa_c | hsa_c |
| irc_0 | irc_0 |
| 0053  | 0795  |
| 06    | 80    |
| hsa_c | hsa_c |
| irc_0 | irc_0 |
| 0876  | 0795  |
| 52    | 81    |
| hsa_c | hsa_c |
| irc_0 | irc_0 |
| 0876  | 0795  |
| 96    | 82    |
| hsa_c | hsa_c |
| irc_0 | irc_0 |
| 0877  | 0795  |
| 02    | 83    |
| hsa_c | hsa_c |
| irc_0 | irc_0 |
| 0877  | 0795  |
| 03    | 84    |
| hsa_c | hsa_c |
| irc_0 | irc_0 |
| 0878  | 0796  |
| 20    | 99    |
| hsa_c | hsa_c |
| irc_0 | irc_0 |
| 0878  | 0796  |
| 23    | 98    |
| hsa_c | hsa_c |
| irc_0 | irc_0 |
| 0878  | 0797  |
| 25    | 10    |
| hsa_c | hsa_c |
| irc_0 | irc_0 |
| 0878  | 0797  |
| 26    | 11    |
| hsa_c | hsa_c |
| irc_0 | irc_0 |
| 0878  | 0797  |
| 29    | 12    |
| hsa_c | hsa_c |
| irc_0 | irc_0 |
| 0878  | 0797  |
| 32    | 15    |
| hsa_c | hsa_c |
| irc_0 | irc_0 |
| 0878  | 0797  |

|       |       |
|-------|-------|
| 34    | 17    |
| hsa_c | hsa_c |
| irc_0 | irc_0 |
| 0878  | 0797  |
| 36    | 18    |
| hsa_c | hsa_c |
| irc_0 | irc_0 |
| 0878  | 0797  |
| 37    | 19    |
| hsa_c | hsa_c |
| irc_0 | irc_0 |
| 0878  | 0797  |
| 45    | 20    |
| hsa_c | hsa_c |
| irc_0 | irc_0 |
| 0880  | 0797  |
| 33    | 21    |
| hsa_c | hsa_c |
| irc_0 | irc_0 |
| 0880  | 0797  |
| 63    | 63    |
| hsa_c | hsa_c |
| irc_0 | irc_0 |
| 0880  | 0798  |
| 64    | 05    |
| hsa_c | hsa_c |
| irc_0 | irc_0 |
| 0881  | 0798  |
| 48    | 23    |
| hsa_c | hsa_c |
| irc_0 | irc_0 |
| 0881  | 0060  |
| 50    | 83    |
| hsa_c | hsa_c |
| irc_0 | irc_0 |
| 0881  | 0800  |
| 52    | 20    |
| hsa_c | hsa_c |
| irc_0 | irc_0 |
| 0881  | 0800  |
| 55    | 23    |
| hsa_c | hsa_c |
| irc_0 | irc_0 |
| 0884  | 0800  |
| 33    | 83    |
| hsa_c | hsa_c |
| irc_0 | irc_0 |
| 0884  | 0800  |
| 34    | 86    |
| hsa_c | hsa_c |
| irc_0 | irc_0 |
| 0885  | 0800  |
| 28    | 87    |
| hsa_c | hsa_c |

|       |       |
|-------|-------|
| irc_0 | irc_0 |
| 0090  | 0800  |
| 07    | 89    |
| hsa_c | hsa_c |
| irc_0 | irc_0 |
| 0885  | 0800  |
| 54    | 91    |
| hsa_c | hsa_c |
| irc_0 | irc_0 |
| 0885  | 0800  |
| 55    | 92    |
| hsa_c | hsa_c |
| irc_0 | irc_0 |
| 0885  | 0800  |
| 57    | 93    |
| hsa_c | hsa_c |
| irc_0 | irc_0 |
| 0885  | 0801  |
| 58    | 10    |
| hsa_c | hsa_c |
| irc_0 | irc_0 |
| 0885  | 0801  |
| 59    | 11    |
| hsa_c | hsa_c |
| irc_0 | irc_0 |
| 0885  | 0801  |
| 60    | 12    |
| hsa_c | hsa_c |
| irc_0 | irc_0 |
| 0885  | 0801  |
| 61    | 13    |
| hsa_c | hsa_c |
| irc_0 | irc_0 |
| 0885  | 0802  |
| 62    | 98    |
| hsa_c | hsa_c |
| irc_0 | irc_0 |
| 0889  | 0074  |
| 08    | 69    |
| hsa_c | hsa_c |
| irc_0 | irc_0 |
| 0889  | 0074  |
| 09    | 70    |
| hsa_c | hsa_c |
| irc_0 | irc_0 |
| 0889  | 0030  |
| 10    | 86    |
| hsa_c | hsa_c |
| irc_0 | irc_0 |
| 0889  | 0059  |
| 23    | 79    |
| hsa_c | hsa_c |
| irc_0 | irc_0 |
| 0889  | 0064  |
| 24    | 42    |

|       |       |
|-------|-------|
| hsa_c | hsa_c |
| irc_0 | irc_0 |
| 0889  | 0075  |
| 26    | 02    |
| hsa_c | hsa_c |
| irc_0 | irc_0 |
| 0889  | 0065  |
| 27    | 62    |
| hsa_c | hsa_c |
| irc_0 | irc_0 |
| 0889  | 0803  |
| 28    | 57    |
| hsa_c | hsa_c |
| irc_0 | irc_0 |
| 0889  | 0803  |
| 29    | 55    |
| hsa_c | hsa_c |
| irc_0 | irc_0 |
| 0889  | 0090  |
| 30    | 77    |
| hsa_c | hsa_c |
| irc_0 | irc_0 |
| 0889  | 0063  |
| 31    | 72    |
| hsa_c | hsa_c |
| irc_0 | irc_0 |
| 0889  | 0085  |
| 32    | 76    |
| hsa_c | hsa_c |
| irc_0 | irc_0 |
| 0889  | 0805  |
| 34    | 06    |
| hsa_c | hsa_c |
| irc_0 | irc_0 |
| 0889  | 0052  |
| 35    | 83    |
| hsa_c | hsa_c |
| irc_0 | irc_0 |
| 0889  | 0081  |
| 36    | 67    |
| hsa_c | hsa_c |
| irc_0 | irc_0 |
| 0889  | 0036  |
| 37    | 03    |
| hsa_c | hsa_c |
| irc_0 | irc_0 |
| 0889  | 0068  |
| 38    | 21    |
| hsa_c | hsa_c |
| irc_0 | irc_0 |
| 0889  | 0091  |
| 39    | 29    |
| hsa_c | hsa_c |
| irc_0 | irc_0 |
| 0889  | 0033  |

|       |       |
|-------|-------|
| 40    | 17    |
| hsa_c | hsa_c |
| irc_0 | irc_0 |
| 0889  | 0805  |
| 41    | 10    |
| hsa_c | hsa_c |
| irc_0 | irc_0 |
| 0889  | 0805  |
| 42    | 21    |
| hsa_c | hsa_c |
| irc_0 | irc_0 |
| 0889  | 0805  |
| 43    | 24    |
| hsa_c | hsa_c |
| irc_0 | irc_0 |
| 0889  | 0805  |
| 44    | 27    |
| hsa_c | hsa_c |
| irc_0 | irc_0 |
| 0889  | 0805  |
| 45    | 28    |
| hsa_c | hsa_c |
| irc_0 | irc_0 |
| 0889  | 0805  |
| 46    | 29    |
| hsa_c | hsa_c |
| irc_0 | irc_0 |
| 0889  | 0805  |
| 47    | 30    |
| hsa_c | hsa_c |
| irc_0 | irc_0 |
| 0891  | 0089  |
| 11    | 71    |
| hsa_c | hsa_c |
| irc_0 | irc_0 |
| 0891  | 0063  |
| 12    | 68    |
| hsa_c | hsa_c |
| irc_0 | irc_0 |
| 0891  | 0067  |
| 16    | 66    |
| hsa_c | hsa_c |
| irc_0 | irc_0 |
| 0891  | 0807  |
| 18    | 50    |
| hsa_c | hsa_c |
| irc_0 | irc_0 |
| 0891  | 0807  |
| 19    | 55    |
| hsa_c | hsa_c |
| irc_0 | irc_0 |
| 0891  | 0807  |
| 41    | 52    |
| hsa_c | hsa_c |

|       |       |
|-------|-------|
| irc_0 | irc_0 |
| 0891  | 0807  |
| 92    | 56    |
| hsa_c | hsa_c |
| irc_0 | irc_0 |
| 0891  | 0807  |
| 93    | 53    |
| hsa_c | hsa_c |
| irc_0 | irc_0 |
| 0068  | 0807  |
| 25    | 58    |
| hsa_c | hsa_c |
| irc_0 | irc_0 |
| 0892  | 0807  |
| 86    | 59    |
| hsa_c | hsa_c |
| irc_0 | irc_0 |
| 0892  | 0132  |
| 95    | 4     |
| hsa_c | hsa_c |
| irc_0 | irc_0 |
| 0893  | 0807  |
| 00    | 73    |
| hsa_c | hsa_c |
| irc_0 | irc_0 |
| 0895  | 0807  |
| 24    | 74    |
| hsa_c | hsa_c |
| irc_0 | irc_0 |
| 0895  | 0807  |
| 26    | 75    |
| hsa_c | hsa_c |
| irc_0 | irc_0 |
| 0895  | 0807  |
| 27    | 76    |
| hsa_c | hsa_c |
| irc_0 | irc_0 |
| 0896  | 0807  |
| 29    | 77    |
| hsa_c | hsa_c |
| irc_0 | irc_0 |
| 0896  | 0807  |
| 30    | 78    |
| hsa_c | hsa_c |
| irc_0 | irc_0 |
| 0896  | 0808  |
| 31    | 07    |
| hsa_c | hsa_c |
| irc_0 | irc_0 |
| 0896  | 0808  |
| 32    | 21    |
| hsa_c | hsa_c |
| irc_0 | irc_0 |
| 0896  | 0808  |
| 33    | 22    |

|       |       |
|-------|-------|
| hsa_c | hsa_c |
| irc_0 | irc_0 |
| 0896  | 0808  |
| 34    | 23    |
| hsa_c | hsa_c |
| irc_0 | irc_0 |
| 0173  | 0808  |
| 63    | 25    |
| hsa_c | hsa_c |
| irc_0 | irc_0 |
| 0175  | 0808  |
| 30    | 61    |
| hsa_c | hsa_c |
| irc_0 | irc_0 |
| 0175  | 0808  |
| 62    | 63    |
| hsa_c | hsa_c |
| irc_0 | irc_0 |
| 0175  | 0808  |
| 63    | 65    |
| hsa_c | hsa_c |
| irc_0 | irc_0 |
| 0175  | 0808  |
| 64    | 66    |
| hsa_c | hsa_c |
| irc_0 | irc_0 |
| 0175  | 0808  |
| 71    | 80    |
| hsa_c | hsa_c |
| irc_0 | irc_0 |
| 0175  | 0809  |
| 72    | 02    |
| hsa_c | hsa_c |
| irc_0 | irc_0 |
| 0176  | 0809  |
| 11    | 63    |
| hsa_c | hsa_c |
| irc_0 | irc_0 |
| 0179  | 0809  |
| 05    | 77    |
| hsa_c | hsa_c |
| irc_0 | irc_0 |
| 0179  | 0024  |
| 20    | 97    |
| hsa_c | hsa_c |
| irc_0 | irc_0 |
| 0179  | 0810  |
| 21    | 25    |
| hsa_c | hsa_c |
| irc_0 | irc_0 |
| 0179  | 0811  |
| 22    | 66    |
| hsa_c | hsa_c |
| irc_0 | irc_0 |
| 0179  | 0811  |

|       |       |
|-------|-------|
| 23    | 79    |
| hsa_c | hsa_c |
| irc_0 | irc_0 |
| 0179  | 0812  |
| 24    | 01    |
| hsa_c | hsa_c |
| irc_0 | irc_0 |
| 0179  | 0812  |
| 25    | 02    |
| hsa_c | hsa_c |
| irc_0 | irc_0 |
| 0198  | 0812  |
| 0     | 03    |
| hsa_c | hsa_c |
| irc_0 | irc_0 |
| 0180  | 0812  |
| 67    | 04    |
| hsa_c | hsa_c |
| irc_0 | irc_0 |
| 0180  | 0812  |
| 69    | 05    |
| hsa_c | hsa_c |
| irc_0 | irc_0 |
| 0182  | 0213  |
| 30    | 8     |
| hsa_c | hsa_c |
| irc_0 | irc_0 |
| 0182  | 0812  |
| 31    | 12    |
| hsa_c | hsa_c |
| irc_0 | irc_0 |
| 0182  | 0812  |
| 32    | 30    |
| hsa_c | hsa_c |
| irc_0 | irc_0 |
| 0182  | 0812  |
| 39    | 32    |
| hsa_c | hsa_c |
| irc_0 | irc_0 |
| 0024  | 0812  |
| 61    | 35    |
| hsa_c | hsa_c |
| irc_0 | irc_0 |
| 0035  | 0812  |
| 47    | 36    |
| hsa_c | hsa_c |
| irc_0 | irc_0 |
| 0080  | 0812  |
| 28    | 37    |
| hsa_c | hsa_c |
| irc_0 | irc_0 |
| 0059  | 0812  |
| 11    | 39    |
| hsa_c | hsa_c |



|       |       |
|-------|-------|
| irc_0 | irc_0 |
| 0061  | 0812  |
| 52    | 45    |
| hsa_c | hsa_c |
| irc_0 | irc_0 |
| 0182  | 0812  |
| 99    | 47    |
| hsa_c | hsa_c |
| irc_0 | irc_0 |
| 0073  | 0812  |
| 89    | 48    |
| hsa_c | hsa_c |
| irc_0 | irc_0 |
| 0023  | 0812  |
| 42    | 49    |
| hsa_c | hsa_c |
| irc_0 | irc_0 |
| 0184  | 0813  |
| 19    | 55    |
| hsa_c | hsa_c |
| irc_0 | irc_0 |
| 0184  | 0813  |
| 20    | 56    |
| hsa_c | hsa_c |
| irc_0 | irc_0 |
| 0184  | 0813  |
| 22    | 58    |
| hsa_c | hsa_c |
| irc_0 | irc_0 |
| 0184  | 0813  |
| 26    | 71    |
| hsa_c | hsa_c |
| irc_0 | irc_0 |
| 0184  | 0814  |
| 28    | 62    |
| hsa_c | hsa_c |
| irc_0 | irc_0 |
| 0184  | 0814  |
| 29    | 63    |
| hsa_c | hsa_c |
| irc_0 | irc_0 |
| 0184  | 0814  |
| 31    | 79    |
| hsa_c | hsa_c |
| irc_0 | irc_0 |
| 0184  | 0815  |
| 35    | 38    |
| hsa_c | hsa_c |
| irc_0 | irc_0 |
| 0184  | 0815  |
| 36    | 39    |
| hsa_c | hsa_c |
| irc_0 | irc_0 |
| 0184  | 0815  |
| 58    | 40    |

|       |        |
|-------|--------|
| hsa_c | hsa_c  |
| irc_0 | irc_0  |
| 0184  | 0815   |
| 65    | 41     |
| hsa_c | hsa_c  |
| irc_0 | irc_0  |
| 0085  | 0816   |
| 23    | 11     |
| hsa_c | sa_cir |
| irc_0 | c_008  |
| 0185  | 1633   |
| 64    |        |
| hsa_c | hsa_c  |
| irc_0 | irc_0  |
| 0185  | 0816   |
| 65    | 75     |
| hsa_c | hsa_c  |
| irc_0 | irc_0  |
| 0185  | 0816   |
| 66    | 76     |
| hsa_c | hsa_c  |
| irc_0 | irc_0  |
| 0185  | 0816   |
| 67    | 77     |
| hsa_c | hsa_c  |
| irc_0 | irc_0  |
| 0185  | 0816   |
| 68    | 78     |
| hsa_c | hsa_c  |
| irc_0 | irc_0  |
| 0185  | 0818   |
| 69    | 78     |
| hsa_c | hsa_c  |
| irc_0 | irc_0  |
| 0185  | 0818   |
| 70    | 79     |
| hsa_c | hsa_c  |
| irc_0 | irc_0  |
| 0185  | 0039   |
| 71    | 32     |
| hsa_c | hsa_c  |
| irc_0 | irc_0  |
| 0185  | 0819   |
| 72    | 07     |
| hsa_c | hsa_c  |
| irc_0 | irc_0  |
| 0185  | 0819   |
| 73    | 17     |
| hsa_c | hsa_c  |
| irc_0 | irc_0  |
| 0185  | 0819   |
| 74    | 18     |
| hsa_c | hsa_c  |
| irc_0 | irc_0  |
| 0187  | 0819   |

|       |       |
|-------|-------|
| 52    | 25    |
| hsa_c | hsa_c |
| irc_0 | irc_0 |
| 0188  | 0819  |
| 16    | 26    |
| hsa_c | hsa_c |
| irc_0 | irc_0 |
| 0188  | 0819  |
| 17    | 29    |
| hsa_c | hsa_c |
| irc_0 | irc_0 |
| 0188  | 0819  |
| 19    | 32    |
| hsa_c | hsa_c |
| irc_0 | irc_0 |
| 0188  | 0819  |
| 20    | 34    |
| hsa_c | hsa_c |
| irc_0 | irc_0 |
| 0083  | 0819  |
| 74    | 35    |
| hsa_c | hsa_c |
| irc_0 | irc_0 |
| 0189  | 0819  |
| 40    | 37    |
| hsa_c | hsa_c |
| irc_0 | irc_0 |
| 0189  | 0819  |
| 62    | 68    |
| hsa_c | hsa_c |
| irc_0 | irc_0 |
| 0189  | 0819  |
| 64    | 69    |
| hsa_c | hsa_c |
| irc_0 | irc_0 |
| 0190  | 0819  |
| 38    | 70    |
| hsa_c | hsa_c |
| irc_0 | irc_0 |
| 0190  | 0819  |
| 39    | 72    |
| hsa_c | hsa_c |
| irc_0 | irc_0 |
| 0190  | 0819  |
| 42    | 74    |
| hsa_c | hsa_c |
| irc_0 | irc_0 |
| 0191  | 0819  |
| 18    | 75    |
| hsa_c | hsa_c |
| irc_0 | irc_0 |
| 0191  | 0819  |
| 81    | 78    |
| hsa_c | hsa_c |

|       |       |
|-------|-------|
| irc_0 | irc_0 |
| 0191  | 0820  |
| 83    | 16    |
| hsa_c | hsa_c |
| irc_0 | irc_0 |
| 0191  | 0062  |
| 84    | 52    |
| hsa_c | hsa_c |
| irc_0 | irc_0 |
| 0191  | 0821  |
| 86    | 68    |
| hsa_c | hsa_c |
| irc_0 | irc_0 |
| 0191  | 0821  |
| 87    | 69    |
| hsa_c | hsa_c |
| irc_0 | irc_0 |
| 0191  | 0821  |
| 88    | 85    |
| hsa_c | hsa_c |
| irc_0 | irc_0 |
| 0191  | 0821  |
| 89    | 92    |
| hsa_c | hsa_c |
| irc_0 | irc_0 |
| 0191  | 0821  |
| 91    | 99    |
| hsa_c | hsa_c |
| irc_0 | irc_0 |
| 0191  | 0822  |
| 92    | 01    |
| hsa_c | hsa_c |
| irc_0 | irc_0 |
| 0192  | 0822  |
| 65    | 02    |
| hsa_c | hsa_c |
| irc_0 | irc_0 |
| 0192  | 0822  |
| 66    | 08    |
| hsa_c | hsa_c |
| irc_0 | irc_0 |
| 0192  | 0822  |
| 69    | 16    |
| hsa_c | hsa_c |
| irc_0 | irc_0 |
| 0192  | 0822  |
| 70    | 17    |
| hsa_c | hsa_c |
| irc_0 | irc_0 |
| 0192  | 0822  |
| 71    | 20    |
| hsa_c | hsa_c |
| irc_0 | irc_0 |
| 0061  | 0822  |
| 98    | 21    |

|       |       |
|-------|-------|
| hsa_c | hsa_c |
| irc_0 | irc_0 |
| 0193  | 0822  |
| 74    | 22    |
| hsa_c | hsa_c |
| irc_0 | irc_0 |
| 0197  | 0822  |
| 32    | 33    |
| hsa_c | hsa_c |
| irc_0 | irc_0 |
| 0197  | 0822  |
| 33    | 34    |
| hsa_c | hsa_c |
| irc_0 | irc_0 |
| 0197  | 0822  |
| 69    | 35    |
| hsa_c | hsa_c |
| irc_0 | irc_0 |
| 0197  | 0823  |
| 71    | 39    |
| hsa_c | hsa_c |
| irc_0 | irc_0 |
| 0197  | 0823  |
| 72    | 42    |
| hsa_c | hsa_c |
| irc_0 | irc_0 |
| 0197  | 0823  |
| 78    | 46    |
| hsa_c | hsa_c |
| irc_0 | irc_0 |
| 0197  | 0823  |
| 80    | 51    |
| hsa_c | hsa_c |
| irc_0 | irc_0 |
| 0197  | 0823  |
| 82    | 52    |
| hsa_c | hsa_c |
| irc_0 | irc_0 |
| 0197  | 0823  |
| 83    | 53    |
| hsa_c | hsa_c |
| irc_0 | irc_0 |
| 0197  | 0823  |
| 85    | 54    |
| hsa_c | hsa_c |
| irc_0 | irc_0 |
| 0197  | 0823  |
| 86    | 55    |
| hsa_c | hsa_c |
| irc_0 | irc_0 |
| 0199  | 0823  |
| 75    | 56    |
| hsa_c | hsa_c |
| irc_0 | irc_0 |
| 0200  | 0823  |

|       |       |
|-------|-------|
| 13    | 57    |
| hsa_c | hsa_c |
| irc_0 | irc_0 |
| 0200  | 0823  |
| 14    | 69    |
| hsa_c | hsa_c |
| irc_0 | irc_0 |
| 0200  | 0823  |
| 46    | 71    |
| hsa_c | hsa_c |
| irc_0 | irc_0 |
| 0201  | 0823  |
| 19    | 72    |
| hsa_c | hsa_c |
| irc_0 | irc_0 |
| 0201  | 0823  |
| 20    | 73    |
| hsa_c | hsa_c |
| irc_0 | irc_0 |
| 0202  | 0823  |
| 57    | 74    |
| hsa_c | hsa_c |
| irc_0 | irc_0 |
| 0202  | 0823  |
| 58    | 75    |
| hsa_c | hsa_c |
| irc_0 | irc_0 |
| 0202  | 0823  |
| 59    | 76    |
| hsa_c | hsa_c |
| irc_0 | irc_0 |
| 0034  | 0825  |
| 62    | 61    |
| hsa_c | hsa_c |
| irc_0 | irc_0 |
| 0204  | 0825  |
| 86    | 62    |
| hsa_c | hsa_c |
| irc_0 | irc_0 |
| 0204  | 0825  |
| 87    | 70    |
| hsa_c | hsa_c |
| irc_0 | irc_0 |
| 0204  | 0826  |
| 88    | 11    |
| hsa_c | hsa_c |
| irc_0 | irc_0 |
| 0205  | 0826  |
| 55    | 18    |
| hsa_c | hsa_c |
| irc_0 | irc_0 |
| 0205  | 0826  |
| 56    | 19    |
| hsa_c | hsa_c |

|       |       |
|-------|-------|
| irc_0 | irc_0 |
| 0205  | 0826  |
| 59    | 21    |
| hsa_c | hsa_c |
| irc_0 | irc_0 |
| 0206  | 0826  |
| 69    | 39    |
| hsa_c | hsa_c |
| irc_0 | irc_0 |
| 0207  | 0826  |
| 31    | 42    |
| hsa_c | hsa_c |
| irc_0 | irc_0 |
| 0207  | 0826  |
| 32    | 43    |
| hsa_c | hsa_c |
| irc_0 | irc_0 |
| 0212  | 0826  |
| 05    | 44    |
| hsa_c | hsa_c |
| irc_0 | irc_0 |
| 0212  | 0826  |
| 95    | 45    |
| hsa_c | hsa_c |
| irc_0 | irc_0 |
| 0213  | 0826  |
| 43    | 46    |
| hsa_c | hsa_c |
| irc_0 | irc_0 |
| 0213  | 0826  |
| 54    | 51    |
| hsa_c | hsa_c |
| irc_0 | irc_0 |
| 0213  | 0826  |
| 55    | 52    |
| hsa_c | hsa_c |
| irc_0 | irc_0 |
| 0213  | 0826  |
| 56    | 53    |
| hsa_c | hsa_c |
| irc_0 | irc_0 |
| 0213  | 0826  |
| 57    | 54    |
| hsa_c | hsa_c |
| irc_0 | irc_0 |
| 0213  | 0826  |
| 58    | 60    |
| hsa_c | hsa_c |
| irc_0 | irc_0 |
| 0213  | 0827  |
| 59    | 91    |
| hsa_c | hsa_c |
| irc_0 | irc_0 |
| 0213  | 0828  |
| 60    | 24    |

|       |       |
|-------|-------|
| hsa_c | hsa_c |
| irc_0 | irc_0 |
| 0213  | 0828  |
| 61    | 25    |
| hsa_c | hsa_c |
| irc_0 | irc_0 |
| 0213  | 0828  |
| 62    | 26    |
| hsa_c | hsa_c |
| irc_0 | irc_0 |
| 0213  | 0049  |
| 63    | 30    |
| hsa_c | hsa_c |
| irc_0 | irc_0 |
| 0213  | 0828  |
| 64    | 66    |
| hsa_c | hsa_c |
| irc_0 | irc_0 |
| 0213  | 0828  |
| 65    | 68    |
| hsa_c | hsa_c |
| irc_0 | irc_0 |
| 0215  | 0026  |
| 78    | 59    |
| hsa_c | hsa_c |
| irc_0 | irc_0 |
| 0215  | 0829  |
| 80    | 16    |
| hsa_c | hsa_c |
| irc_0 | irc_0 |
| 0215  | 0829  |
| 81    | 57    |
| hsa_c | hsa_c |
| irc_0 | irc_0 |
| 0216  | 0829  |
| 29    | 59    |
| hsa_c | hsa_c |
| irc_0 | irc_0 |
| 0216  | 0829  |
| 49    | 60    |
| hsa_c | hsa_c |
| irc_0 | irc_0 |
| 0217  | 0829  |
| 16    | 61    |
| hsa_c | hsa_c |
| irc_0 | irc_0 |
| 0217  | 0829  |
| 23    | 63    |
| hsa_c | hsa_c |
| irc_0 | irc_0 |
| 0217  | 0829  |
| 32    | 64    |
| hsa_c | hsa_c |
| irc_0 | irc_0 |
| 0217  | 0829  |



|       |       |
|-------|-------|
| 33    | 66    |
| hsa_c | hsa_c |
| irc_0 | irc_0 |
| 0217  | 0829  |
| 36    | 67    |
| hsa_c | hsa_c |
| irc_0 | irc_0 |
| 0217  | 0829  |
| 40    | 68    |
| hsa_c | hsa_c |
| irc_0 | irc_0 |
| 0217  | 0829  |
| 41    | 70    |
| hsa_c | hsa_c |
| irc_0 | irc_0 |
| 0217  | 0831  |
| 42    | 20    |
| hsa_c | hsa_c |
| irc_0 | irc_0 |
| 0217  | 0831  |
| 43    | 33    |
| hsa_c | hsa_c |
| irc_0 | irc_0 |
| 0217  | 0831  |
| 65    | 37    |
| hsa_c | hsa_c |
| irc_0 | irc_0 |
| 0217  | 0832  |
| 66    | 98    |
| hsa_c | hsa_c |
| irc_0 | irc_0 |
| 0217  | 0834  |
| 68    | 32    |
| hsa_c | hsa_c |
| irc_0 | irc_0 |
| 0217  | 0834  |
| 76    | 33    |
| hsa_c | hsa_c |
| irc_0 | irc_0 |
| 0218  | 0834  |
| 22    | 34    |
| hsa_c | hsa_c |
| irc_0 | irc_0 |
| 0218  | 0161  |
| 23    | 0     |
| hsa_c | hsa_c |
| irc_0 | irc_0 |
| 0218  | 0835  |
| 37    | 96    |
| hsa_c | hsa_c |
| irc_0 | irc_0 |
| 0218  | 0836  |
| 38    | 07    |
| hsa_c | hsa_c |

|       |       |
|-------|-------|
| irc_0 | irc_0 |
| 0219  | 0836  |
| 58    | 08    |
| hsa_c | hsa_c |
| irc_0 | irc_0 |
| 0221  | 0836  |
| 29    | 11    |
| hsa_c | hsa_c |
| irc_0 | irc_0 |
| 0221  | 0836  |
| 31    | 12    |
| hsa_c | hsa_c |
| irc_0 | irc_0 |
| 0221  | 0836  |
| 34    | 14    |
| hsa_c | hsa_c |
| irc_0 | irc_0 |
| 0221  | 0020  |
| 35    | 81    |
| hsa_c | hsa_c |
| irc_0 | irc_0 |
| 0221  | 0063  |
| 56    | 20    |
| hsa_c | hsa_c |
| irc_0 | irc_0 |
| 0221  | 0836  |
| 57    | 19    |
| hsa_c | hsa_c |
| irc_0 | irc_0 |
| 0221  | 0836  |
| 58    | 20    |
| hsa_c | hsa_c |
| irc_0 | irc_0 |
| 0224  | 0836  |
| 26    | 21    |
| hsa_c | hsa_c |
| irc_0 | irc_0 |
| 0224  | 0836  |
| 27    | 22    |
| hsa_c | hsa_c |
| irc_0 | irc_0 |
| 0224  | 0836  |
| 28    | 23    |
| hsa_c | hsa_c |
| irc_0 | irc_0 |
| 0224  | 0836  |
| 29    | 24    |
| hsa_c | hsa_c |
| irc_0 | irc_0 |
| 0224  | 0836  |
| 54    | 47    |
| hsa_c | hsa_c |
| irc_0 | irc_0 |
| 0224  | 0836  |
| 57    | 50    |

|       |       |
|-------|-------|
| hsa_c | hsa_c |
| irc_0 | irc_0 |
| 0224  | 0836  |
| 58    | 51    |
| hsa_c | hsa_c |
| irc_0 | irc_0 |
| 0224  | 0837  |
| 59    | 28    |
| hsa_c | hsa_c |
| irc_0 | irc_0 |
| 0224  | 0837  |
| 61    | 71    |
| hsa_c | hsa_c |
| irc_0 | irc_0 |
| 0224  | 0837  |
| 64    | 73    |
| hsa_c | hsa_c |
| irc_0 | irc_0 |
| 0038  | 0837  |
| 43    | 74    |
| hsa_c | hsa_c |
| irc_0 | irc_0 |
| 0226  | 0837  |
| 01    | 76    |
| hsa_c | hsa_c |
| irc_0 | irc_0 |
| 0038  | 0837  |
| 12    | 78    |
| hsa_c | hsa_c |
| irc_0 | irc_0 |
| 0027  | 0078  |
| 91    | 00    |
| hsa_c | hsa_c |
| irc_0 | irc_0 |
| 0064  | 0838  |
| 17    | 48    |
| hsa_c | hsa_c |
| irc_0 | irc_0 |
| 0071  | 0838  |
| 85    | 52    |
| hsa_c | hsa_c |
| irc_0 | irc_0 |
| 0059  | 0838  |
| 29    | 53    |
| hsa_c | hsa_c |
| irc_0 | irc_0 |
| 0059  | 0839  |
| 15    | 03    |
| hsa_c | hsa_c |
| irc_0 | irc_0 |
| 0228  | 0839  |
| 32    | 04    |
| hsa_c | hsa_c |
| irc_0 | irc_0 |
| 0228  | 0839  |

|       |       |
|-------|-------|
| 62    | 05    |
| hsa_c | hsa_c |
| irc_0 | irc_0 |
| 0228  | 0839  |
| 63    | 42    |
| hsa_c | hsa_c |
| irc_0 | irc_0 |
| 0228  | 0839  |
| 64    | 79    |
| hsa_c | hsa_c |
| irc_0 | irc_0 |
| 0228  | 0839  |
| 65    | 80    |
| hsa_c | hsa_c |
| irc_0 | irc_0 |
| 0228  | 0839  |
| 66    | 81    |
| hsa_c | hsa_c |
| irc_0 | irc_0 |
| 0228  | 0839  |
| 67    | 82    |
| hsa_c | hsa_c |
| irc_0 | irc_0 |
| 0229  | 0840  |
| 26    | 64    |
| hsa_c | hsa_c |
| irc_0 | irc_0 |
| 0024  | 0840  |
| 40    | 73    |
| hsa_c | hsa_c |
| irc_0 | irc_0 |
| 0230  | 0840  |
| 12    | 75    |
| hsa_c | hsa_c |
| irc_0 | irc_0 |
| 0230  | 0841  |
| 14    | 78    |
| hsa_c | hsa_c |
| irc_0 | irc_0 |
| 0231  | 0841  |
| 87    | 79    |
| hsa_c | hsa_c |
| irc_0 | irc_0 |
| 0232  | 0084  |
| 47    | 81    |
| hsa_c | hsa_c |
| irc_0 | irc_0 |
| 0232  | 0144  |
| 51    | 9     |
| hsa_c | hsa_c |
| irc_0 | irc_0 |
| 0232  | 0844  |
| 52    | 96    |
| hsa_c | hsa_c |

|       |       |
|-------|-------|
| irc_0 | irc_0 |
| 0232  | 0845  |
| 54    | 25    |
| hsa_c | hsa_c |
| irc_0 | irc_0 |
| 0232  | 0845  |
| 57    | 26    |
| hsa_c | hsa_c |
| irc_0 | irc_0 |
| 0232  | 0845  |
| 58    | 87    |
| hsa_c | hsa_c |
| irc_0 | irc_0 |
| 0232  | 0845  |
| 59    | 88    |
| hsa_c | hsa_c |
| irc_0 | irc_0 |
| 0233  | 0845  |
| 35    | 89    |
| hsa_c | hsa_c |
| irc_0 | irc_0 |
| 0233  | 0845  |
| 67    | 90    |
| hsa_c | hsa_c |
| irc_0 | irc_0 |
| 0233  | 0845  |
| 73    | 91    |
| hsa_c | hsa_c |
| irc_0 | irc_0 |
| 0233  | 0845  |
| 75    | 93    |
| hsa_c | hsa_c |
| irc_0 | irc_0 |
| 0233  | 0845  |
| 76    | 94    |
| hsa_c | hsa_c |
| irc_0 | irc_0 |
| 0233  | 0846  |
| 77    | 23    |
| hsa_c | hsa_c |
| irc_0 | irc_0 |
| 0234  | 0846  |
| 14    | 50    |
| hsa_c | hsa_c |
| irc_0 | irc_0 |
| 0234  | 0846  |
| 15    | 51    |
| hsa_c | hsa_c |
| irc_0 | irc_0 |
| 0234  | 0846  |
| 16    | 52    |
| hsa_c | hsa_c |
| irc_0 | irc_0 |
| 0234  | 0847  |
| 74    | 78    |

|       |       |
|-------|-------|
| hsa_c | hsa_c |
| irc_0 | irc_0 |
| 0234  | 0847  |
| 76    | 91    |
| hsa_c | hsa_c |
| irc_0 | irc_0 |
| 0174  | 0847  |
| 8     | 93    |
| hsa_c | hsa_c |
| irc_0 | irc_0 |
| 0235  | 0847  |
| 31    | 94    |
| hsa_c | hsa_c |
| irc_0 | irc_0 |
| 0238  | 0848  |
| 40    | 03    |
| hsa_c | hsa_c |
| irc_0 | irc_0 |
| 0238  | 0849  |
| 41    | 28    |
| hsa_c | hsa_c |
| irc_0 | irc_0 |
| 0238  | 0086  |
| 42    | 08    |
| hsa_c | hsa_c |
| irc_0 | irc_0 |
| 0238  | 0849  |
| 50    | 55    |
| hsa_c | hsa_c |
| irc_0 | irc_0 |
| 0238  | 0850  |
| 51    | 02    |
| hsa_c | hsa_c |
| irc_0 | irc_0 |
| 0238  | 0850  |
| 53    | 04    |
| hsa_c | hsa_c |
| irc_0 | irc_0 |
| 0238  | 0850  |
| 54    | 05    |
| hsa_c | hsa_c |
| irc_0 | irc_0 |
| 0238  | 0850  |
| 57    | 07    |
| hsa_c | hsa_c |
| irc_0 | irc_0 |
| 0238  | 0850  |
| 60    | 08    |
| hsa_c | hsa_c |
| irc_0 | irc_0 |
| 0238  | 0059  |
| 66    | 34    |
| hsa_c | hsa_c |
| irc_0 | irc_0 |
| 0238  | 0851  |

|       |       |
|-------|-------|
| 67    | 71    |
| hsa_c | hsa_c |
| irc_0 | irc_0 |
| 0238  | 0851  |
| 68    | 74    |
| hsa_c | hsa_c |
| irc_0 | irc_0 |
| 0238  | 0851  |
| 69    | 75    |
| hsa_c | hsa_c |
| irc_0 | irc_0 |
| 0238  | 0852  |
| 70    | 88    |
| hsa_c | hsa_c |
| irc_0 | irc_0 |
| 0238  | 0852  |
| 80    | 89    |
| hsa_c | hsa_c |
| irc_0 | irc_0 |
| 0090  | 0852  |
| 16    | 90    |
| hsa_c | hsa_c |
| irc_0 | irc_0 |
| 0240  | 0852  |
| 55    | 91    |
| hsa_c | hsa_c |
| irc_0 | irc_0 |
| 0240  | 0853  |
| 56    | 86    |
| hsa_c | hsa_c |
| irc_0 | irc_0 |
| 0240  | 0026  |
| 60    | 63    |
| hsa_c | hsa_c |
| irc_0 | irc_0 |
| 0240  | 0077  |
| 69    | 79    |
| hsa_c | hsa_c |
| irc_0 | irc_0 |
| 0240  | 0854  |
| 70    | 52    |
| hsa_c | hsa_c |
| irc_0 | irc_0 |
| 0240  | 0027  |
| 71    | 88    |
| hsa_c | hsa_c |
| irc_0 | irc_0 |
| 0240  | 0854  |
| 72    | 83    |
| hsa_c | hsa_c |
| irc_0 | irc_0 |
| 0240  | 0854  |
| 73    | 84    |
| hsa_c | hsa_c |

|       |       |
|-------|-------|
| irc_0 | irc_0 |
| 0243  | 0854  |
| 10    | 88    |
| hsa_c | hsa_c |
| irc_0 | irc_0 |
| 0243  | 0854  |
| 11    | 89    |
| hsa_c | hsa_c |
| irc_0 | irc_0 |
| 0243  | 0854  |
| 12    | 90    |
| hsa_c | hsa_c |
| irc_0 | irc_0 |
| 0244  | 0854  |
| 06    | 91    |
| hsa_c | hsa_c |
| irc_0 | irc_0 |
| 0244  | 0855  |
| 07    | 22    |
| hsa_c | hsa_c |
| irc_0 | irc_0 |
| 0244  | 0855  |
| 08    | 27    |
| hsa_c | hsa_c |
| irc_0 | irc_0 |
| 0244  | 0855  |
| 09    | 28    |
| hsa_c | hsa_c |
| irc_0 | irc_0 |
| 0244  | 0855  |
| 10    | 30    |
| hsa_c | hsa_c |
| irc_0 | irc_0 |
| 0244  | 0855  |
| 41    | 31    |
| hsa_c | hsa_c |
| irc_0 | irc_0 |
| 0244  | 0855  |
| 50    | 32    |
| hsa_c | hsa_c |
| irc_0 | irc_0 |
| 0244  | 0081  |
| 51    | 47    |
| hsa_c | hsa_c |
| irc_0 | irc_0 |
| 0244  | 0855  |
| 52    | 60    |
| hsa_c | hsa_c |
| irc_0 | irc_0 |
| 0244  | 0045  |
| 58    | 15    |
| hsa_c | hsa_c |
| irc_0 | irc_0 |
| 0244  | 0053  |
| 59    | 90    |



|       |       |
|-------|-------|
| hsa_c | hsa_c |
| irc_0 | irc_0 |
| 0244  | 0856  |
| 62    | 41    |
| hsa_c | hsa_c |
| irc_0 | irc_0 |
| 0244  | 0856  |
| 75    | 77    |
| hsa_c | hsa_c |
| irc_0 | irc_0 |
| 0245  | 0856  |
| 63    | 78    |
| hsa_c | hsa_c |
| irc_0 | irc_0 |
| 0245  | 0856  |
| 64    | 79    |
| hsa_c | hsa_c |
| irc_0 | irc_0 |
| 0245  | 0856  |
| 65    | 80    |
| hsa_c | hsa_c |
| irc_0 | irc_0 |
| 0245  | 0857  |
| 66    | 91    |
| hsa_c | hsa_c |
| irc_0 | irc_0 |
| 0245  | 0858  |
| 67    | 36    |
| hsa_c | hsa_c |
| irc_0 | irc_0 |
| 0245  | 0858  |
| 68    | 97    |
| hsa_c | hsa_c |
| irc_0 | irc_0 |
| 0245  | 0858  |
| 69    | 98    |
| hsa_c | hsa_c |
| irc_0 | irc_0 |
| 0245  | 0860  |
| 70    | 53    |
| hsa_c | hsa_c |
| irc_0 | irc_0 |
| 0145  | 0860  |
| 5     | 54    |
| hsa_c | hsa_c |
| irc_0 | irc_0 |
| 0246  | 0860  |
| 09    | 55    |
| hsa_c | hsa_c |
| irc_0 | irc_0 |
| 0246  | 0860  |
| 10    | 56    |
| hsa_c | hsa_c |
| irc_0 | irc_0 |
| 0246  | 0860  |

|       |       |
|-------|-------|
| 11    | 57    |
| hsa_c | hsa_c |
| irc_0 | irc_0 |
| 0246  | 0860  |
| 12    | 58    |
| hsa_c | hsa_c |
| irc_0 | irc_0 |
| 0246  | 0860  |
| 13    | 59    |
| hsa_c | hsa_c |
| irc_0 | irc_0 |
| 0246  | 0860  |
| 14    | 60    |
| hsa_c | hsa_c |
| irc_0 | irc_0 |
| 0246  | 0860  |
| 15    | 61    |
| hsa_c | hsa_c |
| irc_0 | irc_0 |
| 0246  | 0860  |
| 18    | 62    |
| hsa_c | hsa_c |
| irc_0 | irc_0 |
| 0246  | 0861  |
| 20    | 52    |
| hsa_c | hsa_c |
| irc_0 | irc_0 |
| 0248  | 0862  |
| 02    | 43    |
| hsa_c | hsa_c |
| irc_0 | irc_0 |
| 0248  | 0862  |
| 03    | 44    |
| hsa_c | hsa_c |
| irc_0 | irc_0 |
| 0248  | 0058  |
| 04    | 90    |
| hsa_c | hsa_c |
| irc_0 | irc_0 |
| 0248  | 0862  |
| 05    | 85    |
| hsa_c | hsa_c |
| irc_0 | irc_0 |
| 0248  | 0863  |
| 06    | 07    |
| hsa_c | hsa_c |
| irc_0 | irc_0 |
| 0249  | 0863  |
| 93    | 34    |
| hsa_c | hsa_c |
| irc_0 | irc_0 |
| 0250  | 0071  |
| 18    | 70    |
| hsa_c | hsa_c |

|       |       |
|-------|-------|
| irc_0 | irc_0 |
| 0250  | 0082  |
| 23    | 73    |
| hsa_c | hsa_c |
| irc_0 | irc_0 |
| 0250  | 0864  |
| 49    | 52    |
| hsa_c | hsa_c |
| irc_0 | irc_0 |
| 0250  | 0864  |
| 55    | 53    |
| hsa_c | hsa_c |
| irc_0 | irc_0 |
| 0250  | 0864  |
| 57    | 54    |
| hsa_c | hsa_c |
| irc_0 | irc_0 |
| 0250  | 0865  |
| 59    | 84    |
| hsa_c | hsa_c |
| irc_0 | irc_0 |
| 0073  | 0865  |
| 77    | 86    |
| hsa_c | hsa_c |
| irc_0 | irc_0 |
| 0069  | 0033  |
| 57    | 06    |
| hsa_c | hsa_c |
| irc_0 | irc_0 |
| 0082  | 0867  |
| 21    | 65    |
| hsa_c | hsa_c |
| irc_0 | irc_0 |
| 0090  | 0867  |
| 10    | 66    |
| hsa_c | hsa_c |
| irc_0 | irc_0 |
| 0055  | 0867  |
| 4     | 70    |
| hsa_c | hsa_c |
| irc_0 | irc_0 |
| 0254  | 0058  |
| 68    | 33    |
| hsa_c | hsa_c |
| irc_0 | irc_0 |
| 0255  | 0871  |
| 02    | 05    |
| hsa_c | hsa_c |
| irc_0 | irc_0 |
| 0255  | 0871  |
| 45    | 85    |
| hsa_c | hsa_c |
| irc_0 | irc_0 |
| 0255  | 0871  |
| 46    | 86    |

|       |       |
|-------|-------|
| hsa_c | hsa_c |
| irc_0 | irc_0 |
| 0255  | 0871  |
| 47    | 87    |
| hsa_c | hsa_c |
| irc_0 | irc_0 |
| 0255  | 0871  |
| 48    | 98    |
| hsa_c | hsa_c |
| irc_0 | irc_0 |
| 0255  | 0872  |
| 49    | 00    |
| hsa_c | hsa_c |
| irc_0 | irc_0 |
| 0255  | 0872  |
| 50    | 04    |
| hsa_c | hsa_c |
| irc_0 | irc_0 |
| 0041  | 0872  |
| 49    | 17    |
| hsa_c | hsa_c |
| irc_0 | irc_0 |
| 0058  | 0873  |
| 24    | 30    |
| hsa_c | hsa_c |
| irc_0 | irc_0 |
| 0074  | 0873  |
| 78    | 31    |
| hsa_c | hsa_c |
| irc_0 | irc_0 |
| 0256  | 0873  |
| 99    | 32    |
| hsa_c | hsa_c |
| irc_0 | irc_0 |
| 0257  | 0873  |
| 00    | 33    |
| hsa_c | hsa_c |
| irc_0 | irc_0 |
| 0257  | 0054  |
| 05    | 32    |
| hsa_c | hsa_c |
| irc_0 | irc_0 |
| 0257  | 0054  |
| 06    | 33    |
| hsa_c | hsa_c |
| irc_0 | irc_0 |
| 0257  | 0077  |
| 07    | 0     |
| hsa_c | hsa_c |
| irc_0 | irc_0 |
| 0257  | 0874  |
| 08    | 69    |
| hsa_c | hsa_c |
| irc_0 | irc_0 |
| 0257  | 0874  |

|       |       |
|-------|-------|
| 09    | 70    |
| hsa_c | hsa_c |
| irc_0 | irc_0 |
| 0052  | 0874  |
| 34    | 71    |
| hsa_c | hsa_c |
| irc_0 | irc_0 |
| 0257  | 0874  |
| 38    | 72    |
| hsa_c | hsa_c |
| irc_0 | irc_0 |
| 0258  | 0874  |
| 24    | 73    |
| hsa_c | hsa_c |
| irc_0 | irc_0 |
| 0259  | 0874  |
| 26    | 74    |
| hsa_c | hsa_c |
| irc_0 | irc_0 |
| 0259  | 0874  |
| 27    | 75    |
| hsa_c | hsa_c |
| irc_0 | irc_0 |
| 0259  | 0874  |
| 28    | 76    |
| hsa_c | hsa_c |
| irc_0 | irc_0 |
| 0259  | 0874  |
| 52    | 77    |
| hsa_c | hsa_c |
| irc_0 | irc_0 |
| 0259  | 0874  |
| 53    | 78    |
| hsa_c | hsa_c |
| irc_0 | irc_0 |
| 0259  | 0874  |
| 54    | 79    |
| hsa_c | hsa_c |
| irc_0 | irc_0 |
| 0259  | 0874  |
| 55    | 80    |
| hsa_c | hsa_c |
| irc_0 | irc_0 |
| 0259  | 0087  |
| 57    | 20    |
| hsa_c | hsa_c |
| irc_0 | irc_0 |
| 0259  | 0046  |
| 58    | 05    |
| hsa_c | hsa_c |
| irc_0 | irc_0 |
| 0259  | 0876  |
| 75    | 13    |
| hsa_c | hsa_c |

|       |       |
|-------|-------|
| irc_0 | irc_0 |
| 0033  | 0876  |
| 60    | 50    |
| hsa_c | hsa_c |
| irc_0 | irc_0 |
| 0260  | 0876  |
| 57    | 65    |
| hsa_c | hsa_c |
| irc_0 | irc_0 |
| 0260  | 0876  |
| 70    | 66    |
| hsa_c | hsa_c |
| irc_0 | irc_0 |
| 0260  | 0877  |
| 71    | 48    |
| hsa_c | hsa_c |
| irc_0 | irc_0 |
| 0260  | 0877  |
| 72    | 88    |
| hsa_c | hsa_c |
| irc_0 | irc_0 |
| 0260  | 0877  |
| 73    | 89    |
| hsa_c | hsa_c |
| irc_0 | irc_0 |
| 0260  | 0877  |
| 74    | 90    |
| hsa_c | hsa_c |
| irc_0 | irc_0 |
| 0261  | 0877  |
| 48    | 91    |
| hsa_c | hsa_c |
| irc_0 | irc_0 |
| 0262  | 0877  |
| 98    | 92    |
| hsa_c | hsa_c |
| irc_0 | irc_0 |
| 0262  | 0878  |
| 99    | 32    |
| hsa_c | hsa_c |
| irc_0 | irc_0 |
| 0263  | 0878  |
| 14    | 34    |
| hsa_c | hsa_c |
| irc_0 | irc_0 |
| 0266  | 0878  |
| 24    | 44    |
| hsa_c | hsa_c |
| irc_0 | irc_0 |
| 0266  | 0878  |
| 35    | 45    |
| hsa_c | hsa_c |
| irc_0 | irc_0 |
| 0266  | 0878  |
| 72    | 49    |

|       |       |
|-------|-------|
| hsa_c | hsa_c |
| irc_0 | irc_0 |
| 0266  | 0878  |
| 71    | 64    |
| hsa_c | hsa_c |
| irc_0 | irc_0 |
| 0269  | 0879  |
| 89    | 48    |
| hsa_c | hsa_c |
| irc_0 | irc_0 |
| 0269  | 0881  |
| 90    | 04    |
| hsa_c | hsa_c |
| irc_0 | irc_0 |
| 0272  | 0881  |
| 46    | 27    |
| hsa_c | hsa_c |
| irc_0 | irc_0 |
| 0273  | 0881  |
| 41    | 30    |
| hsa_c | hsa_c |
| irc_0 | irc_0 |
| 0273  | 0881  |
| 42    | 31    |
| hsa_c | hsa_c |
| irc_0 | irc_0 |
| 0273  | 0881  |
| 44    | 43    |
| hsa_c | hsa_c |
| irc_0 | irc_0 |
| 0273  | 0881  |
| 45    | 67    |
| hsa_c | hsa_c |
| irc_0 | irc_0 |
| 0273  | 0200  |
| 50    | 4     |
| hsa_c | hsa_c |
| irc_0 | irc_0 |
| 0273  | 0881  |
| 60    | 91    |
| hsa_c | hsa_c |
| irc_0 | irc_0 |
| 0273  | 0881  |
| 61    | 92    |
| hsa_c | hsa_c |
| irc_0 | irc_0 |
| 0274  | 0881  |
| 04    | 96    |
| hsa_c | hsa_c |
| irc_0 | irc_0 |
| 0274  | 0881  |
| 07    | 97    |
| hsa_c | hsa_c |
| irc_0 | irc_0 |
| 0274  | 0882  |

|       |       |
|-------|-------|
| 08    | 00    |
| hsa_c | hsa_c |
| irc_0 | irc_0 |
| 0274  | 0054  |
| 09    | 56    |
| hsa_c | hsa_c |
| irc_0 | irc_0 |
| 0274  | 0882  |
| 10    | 08    |
| hsa_c | hsa_c |
| irc_0 | irc_0 |
| 0274  | 0882  |
| 11    | 09    |
| hsa_c | hsa_c |
| irc_0 | irc_0 |
| 0274  | 0882  |
| 12    | 10    |
| hsa_c | hsa_c |
| irc_0 | irc_0 |
| 0274  | 0882  |
| 13    | 11    |
| hsa_c | hsa_c |
| irc_0 | irc_0 |
| 0274  | 0882  |
| 14    | 12    |
| hsa_c | hsa_c |
| irc_0 | irc_0 |
| 0274  | 0882  |
| 15    | 62    |
| hsa_c | hsa_c |
| irc_0 | irc_0 |
| 0274  | 0882  |
| 16    | 63    |
| hsa_c | hsa_c |
| irc_0 | irc_0 |
| 0274  | 0882  |
| 17    | 66    |
| hsa_c | hsa_c |
| irc_0 | irc_0 |
| 0274  | 0883  |
| 18    | 04    |
| hsa_c | hsa_c |
| irc_0 | irc_0 |
| 0274  | 0883  |
| 19    | 03    |
| hsa_c | hsa_c |
| irc_0 | irc_0 |
| 0274  | 0883  |
| 53    | 15    |
| hsa_c | hsa_c |
| irc_0 | irc_0 |
| 0274  | 0883  |
| 54    | 54    |
| hsa_c | hsa_c |



|       |       |
|-------|-------|
| irc_0 | irc_0 |
| 0274  | 0883  |
| 55    | 53    |
| hsa_c | hsa_c |
| irc_0 | irc_0 |
| 0274  | 0883  |
| 56    | 71    |
| hsa_c | hsa_c |
| irc_0 | irc_0 |
| 0274  | 0883  |
| 57    | 72    |
| hsa_c | hsa_c |
| irc_0 | irc_0 |
| 0275  | 0883  |
| 17    | 73    |
| hsa_c | hsa_c |
| irc_0 | irc_0 |
| 0275  | 0883  |
| 72    | 76    |
| hsa_c | hsa_c |
| irc_0 | irc_0 |
| 0275  | 0883  |
| 73    | 78    |
| hsa_c | hsa_c |
| irc_0 | irc_0 |
| 0275  | 0883  |
| 99    | 79    |
| hsa_c | hsa_c |
| irc_0 | irc_0 |
| 0276  | 0883  |
| 00    | 80    |
| hsa_c | hsa_c |
| irc_0 | irc_0 |
| 0276  | 0883  |
| 79    | 81    |
| hsa_c | hsa_c |
| irc_0 | irc_0 |
| 0276  | 0883  |
| 89    | 82    |
| hsa_c | hsa_c |
| irc_0 | irc_0 |
| 0276  | 0883  |
| 90    | 83    |
| hsa_c | hsa_c |
| irc_0 | irc_0 |
| 0276  | 0884  |
| 93    | 30    |
| hsa_c | hsa_c |
| irc_0 | irc_0 |
| 0276  | 0884  |
| 94    | 34    |
| hsa_c | hsa_c |
| irc_0 | irc_0 |
| 0276  | 0884  |
| 97    | 36    |

|       |       |
|-------|-------|
| hsa_c | hsa_c |
| irc_0 | irc_0 |
| 0276  | 0884  |
| 96    | 37    |
| hsa_c | hsa_c |
| irc_0 | irc_0 |
| 0277  | 0884  |
| 17    | 38    |
| hsa_c | hsa_c |
| irc_0 | irc_0 |
| 0277  | 0884  |
| 18    | 39    |
| hsa_c | hsa_c |
| irc_0 | irc_0 |
| 0071  | 0884  |
| 99    | 40    |
| hsa_c | hsa_c |
| irc_0 | irc_0 |
| 0072  | 0884  |
| 00    | 44    |
| hsa_c | hsa_c |
| irc_0 | irc_0 |
| 0072  | 0884  |
| 01    | 42    |
| hsa_c | hsa_c |
| irc_0 | irc_0 |
| 0277  | 0884  |
| 93    | 43    |
| hsa_c | hsa_c |
| irc_0 | irc_0 |
| 0277  | 0885  |
| 94    | 06    |
| hsa_c | hsa_c |
| irc_0 | irc_0 |
| 0277  | 0885  |
| 95    | 66    |
| hsa_c | hsa_c |
| irc_0 | irc_0 |
| 0279  | 0885  |
| 26    | 69    |
| hsa_c | hsa_c |
| irc_0 | irc_0 |
| 0279  | 0885  |
| 33    | 70    |
| hsa_c | hsa_c |
| irc_0 | irc_0 |
| 0279  | 0885  |
| 34    | 71    |
| hsa_c | hsa_c |
| irc_0 | irc_0 |
| 0279  | 0885  |
| 37    | 72    |
| hsa_c | hsa_c |
| irc_0 | irc_0 |
| 0279  | 0885  |

|       |       |
|-------|-------|
| 38    | 73    |
| hsa_c | hsa_c |
| irc_0 | irc_0 |
| 0279  | 0885  |
| 39    | 74    |
| hsa_c | hsa_c |
| irc_0 | irc_0 |
| 0279  | 0886  |
| 40    | 00    |
| hsa_c | hsa_c |
| irc_0 | irc_0 |
| 0279  | 0886  |
| 41    | 01    |
| hsa_c | hsa_c |
| irc_0 | irc_0 |
| 0280  | 0885  |
| 62    | 95    |
| hsa_c | hsa_c |
| irc_0 | irc_0 |
| 0280  | 0887  |
| 63    | 04    |
| hsa_c | hsa_c |
| irc_0 | irc_0 |
| 0280  | 0887  |
| 64    | 36    |
| hsa_c | hsa_c |
| irc_0 | irc_0 |
| 0283  | 0887  |
| 02    | 91    |
| hsa_c | hsa_c |
| irc_0 | irc_0 |
| 0283  | 0887  |
| 03    | 89    |
| hsa_c | hsa_c |
| irc_0 | irc_0 |
| 0283  | 0889  |
| 04    | 02    |
| hsa_c | hsa_c |
| irc_0 | irc_0 |
| 0283  | 0889  |
| 27    | 19    |
| hsa_c | hsa_c |
| irc_0 | irc_0 |
| 0283  | 0889  |
| 28    | 11    |
| hsa_c | hsa_c |
| irc_0 | irc_0 |
| 0283  | 0890  |
| 54    | 43    |
| hsa_c | hsa_c |
| irc_0 | irc_0 |
| 0283  | 0025  |
| 55    | 43    |
| hsa_c | hsa_c |

|       |       |
|-------|-------|
| irc_0 | irc_0 |
| 0283  | 0890  |
| 56    | 78    |
| hsa_c | hsa_c |
| irc_0 | irc_0 |
| 0283  | 0890  |
| 57    | 80    |
| hsa_c | hsa_c |
| irc_0 | irc_0 |
| 0283  | 0890  |
| 58    | 81    |
| hsa_c | hsa_c |
| irc_0 | irc_0 |
| 0283  | 0890  |
| 59    | 82    |
| hsa_c | hsa_c |
| irc_0 | irc_0 |
| 0283  | 0890  |
| 60    | 92    |
| hsa_c | hsa_c |
| irc_0 | irc_0 |
| 0283  | 0890  |
| 61    | 93    |
| hsa_c | hsa_c |
| irc_0 | irc_0 |
| 0283  | 0890  |
| 62    | 95    |
| hsa_c | hsa_c |
| irc_0 | irc_0 |
| 0283  | 0890  |
| 63    | 96    |
| hsa_c | hsa_c |
| irc_0 | irc_0 |
| 0283  | 0890  |
| 64    | 97    |
| hsa_c | hsa_c |
| irc_0 | irc_0 |
| 0283  | 0890  |
| 65    | 98    |
| hsa_c | hsa_c |
| irc_0 | irc_0 |
| 0283  | 0890  |
| 66    | 99    |
| hsa_c | hsa_c |
| irc_0 | irc_0 |
| 0283  | 0891  |
| 67    | 00    |
| hsa_c | hsa_c |
| irc_0 | irc_0 |
| 0283  | 0891  |
| 68    | 01    |
| hsa_c | hsa_c |
| irc_0 | irc_0 |
| 0283  | 0891  |
| 69    | 02    |

|       |       |
|-------|-------|
| hsa_c | hsa_c |
| irc_0 | irc_0 |
| 0283  | 0891  |
| 70    | 45    |
| hsa_c | hsa_c |
| irc_0 | irc_0 |
| 0283  | 0891  |
| 71    | 46    |
| hsa_c | hsa_c |
| irc_0 | irc_0 |
| 0283  | 0891  |
| 72    | 48    |
| hsa_c | hsa_c |
| irc_0 | irc_0 |
| 0283  | 0891  |
| 73    | 49    |
| hsa_c | hsa_c |
| irc_0 | irc_0 |
| 0284  | 0891  |
| 48    | 51    |
| hsa_c | hsa_c |
| irc_0 | irc_0 |
| 0285  | 0891  |
| 89    | 43    |
| hsa_c | hsa_c |
| irc_0 | irc_0 |
| 0285  | 0891  |
| 90    | 93    |
| hsa_c | hsa_c |
| irc_0 | irc_0 |
| 0288  | 0891  |
| 81    | 92    |
| hsa_c | hsa_c |
| irc_0 | irc_0 |
| 0289  | 0892  |
| 23    | 51    |
| hsa_c | hsa_c |
| irc_0 | irc_0 |
| 0289  | 0893  |
| 24    | 05    |
| hsa_c | hsa_c |
| irc_0 | irc_0 |
| 0289  | 0893  |
| 25    | 06    |
| hsa_c | hsa_c |
| irc_0 | irc_0 |
| 0291  | 0893  |
| 74    | 07    |
| hsa_c | hsa_c |
| irc_0 | irc_0 |
| 0291  | 0893  |
| 77    | 73    |
| hsa_c | hsa_c |
| irc_0 | irc_0 |
| 0291  | 0895  |

|       |       |
|-------|-------|
| 79    | 17    |
| hsa_c | hsa_c |
| irc_0 | irc_0 |
| 0291  | 0895  |
| 80    | 28    |
| hsa_c | hsa_c |
| irc_0 | irc_0 |
| 0291  | 0895  |
| 82    | 29    |
| hsa_c | hsa_c |
| irc_0 | irc_0 |
| 0291  | 0895  |
| 83    | 30    |
| hsa_c | hsa_c |
| irc_0 | irc_0 |
| 0291  | 0895  |
| 85    | 31    |
| hsa_c | hsa_c |
| irc_0 | irc_0 |
| 0291  | 0895  |
| 88    | 35    |
| hsa_c | hsa_c |
| irc_0 | irc_0 |
| 0291  | 0895  |
| 89    | 39    |
| hsa_c | hsa_c |
| irc_0 | irc_0 |
| 0291  | 0895  |
| 90    | 42    |
| hsa_c | hsa_c |
| irc_0 | irc_0 |
| 0291  | 0895  |
| 91    | 43    |
| hsa_c | hsa_c |
| irc_0 | irc_0 |
| 0291  | 0895  |
| 92    | 44    |
| hsa_c | hsa_c |
| irc_0 | irc_0 |
| 0291  | 0895  |
| 93    | 47    |
| hsa_c | hsa_c |
| irc_0 | irc_0 |
| 0291  | 0895  |
| 94    | 48    |
| hsa_c | hsa_c |
| irc_0 | irc_0 |
| 0291  | 0895  |
| 95    | 52    |
| hsa_c | hsa_c |
| irc_0 | irc_0 |
| 0292  | 0896  |
| 44    | 49    |
| hsa_c | hsa_c |

|       |       |
|-------|-------|
| irc_0 | irc_0 |
| 0292  | 0896  |
| 45    | 55    |
| hsa_c | hsa_c |
| irc_0 | irc_0 |
| 0292  | 0896  |
| 90    | 54    |
| hsa_c | hsa_c |
| irc_0 | irc_0 |
| 0292  | 0896  |
| 91    | 94    |
| hsa_c | hsa_c |
| irc_0 | irc_0 |
| 0292  | 0896  |
| 92    | 95    |
| hsa_c | hsa_c |
| irc_0 | irc_0 |
| 0292  | 0026  |
| 94    | 47    |
| hsa_c | hsa_c |
| irc_0 | irc_0 |
| 0292  | 0041  |
| 95    | 01    |
| hsa_c | hsa_c |
| irc_0 | irc_0 |
| 0292  | 0074  |
| 96    | 62    |
| hsa_c | hsa_c |
| irc_0 | irc_0 |
| 0292  | 0897  |
| 97    | 06    |
| hsa_c | hsa_c |
| irc_0 | irc_0 |
| 0292  | 0897  |
| 98    | 07    |
| hsa_c | hsa_c |
| irc_0 | irc_0 |
| 0294  | 0897  |
| 83    | 08    |
| hsa_c | hsa_c |
| irc_0 | irc_0 |
| 0295  | 0897  |
| 42    | 09    |
| hsa_c | hsa_c |
| irc_0 | irc_0 |
| 0295  | 0897  |
| 55    | 10    |
| hsa_c | hsa_c |
| irc_0 | irc_0 |
| 0295  | 0897  |
| 57    | 11    |
| hsa_c | hsa_c |
| irc_0 | irc_0 |
| 0295  | 0897  |
| 58    | 12    |

|       |       |
|-------|-------|
| hsa_c | hsa_c |
| irc_0 | irc_0 |
| 0295  | 0174  |
| 59    | 73    |
| hsa_c | hsa_c |
| irc_0 | irc_0 |
| 0295  | 0174  |
| 60    | 74    |
| hsa_c | hsa_c |
| irc_0 | irc_0 |
| 0295  | 0174  |
| 82    | 75    |
| hsa_c | hsa_c |
| irc_0 | irc_0 |
| 0295  | 0174  |
| 83    | 76    |
| hsa_c | hsa_c |
| irc_0 | irc_0 |
| 0295  | 0174  |
| 84    | 77    |
| hsa_c | hsa_c |
| irc_0 | irc_0 |
| 0296  | 0174  |
| 03    | 78    |
| hsa_c | hsa_c |
| irc_0 | irc_0 |
| 0064  | 0178  |
| 81    | 5     |
| hsa_c | hsa_c |
| irc_0 | irc_0 |
| 0068  | 0176  |
| 33    | 03    |
| hsa_c | hsa_c |
| irc_0 | irc_0 |
| 0296  | 0176  |
| 68    | 06    |
| hsa_c | hsa_c |
| irc_0 | irc_0 |
| 0296  | 0176  |
| 75    | 12    |
| hsa_c | hsa_c |
| irc_0 | irc_0 |
| 0296  | 0176  |
| 79    | 13    |
| hsa_c | hsa_c |
| irc_0 | irc_0 |
| 0296  | 0176  |
| 80    | 14    |
| hsa_c | hsa_c |
| irc_0 | irc_0 |
| 0296  | 0176  |
| 84    | 15    |
| hsa_c | hsa_c |
| irc_0 | irc_0 |
| 0296  | 0176  |



|       |       |
|-------|-------|
| 98    | 16    |
| hsa_c | hsa_c |
| irc_0 | irc_0 |
| 0296  | 0176  |
| 99    | 17    |
| hsa_c | hsa_c |
| irc_0 | irc_0 |
| 0297  | 0176  |
| 00    | 18    |
| hsa_c | hsa_c |
| irc_0 | irc_0 |
| 0297  | 0176  |
| 01    | 19    |
| hsa_c | hsa_c |
| irc_0 | irc_0 |
| 0297  | 0176  |
| 15    | 20    |
| hsa_c | hsa_c |
| irc_0 | irc_0 |
| 0297  | 0039  |
| 34    | 78    |
| hsa_c | hsa_c |
| irc_0 | irc_0 |
| 0299  | 0066  |
| 08    | 64    |
| hsa_c | hsa_c |
| irc_0 | irc_0 |
| 0300  | 0042  |
| 21    | 01    |
| hsa_c | hsa_c |
| irc_0 | irc_0 |
| 0301  | 0056  |
| 42    | 97    |
| hsa_c | hsa_c |
| irc_0 | irc_0 |
| 0301  | 0178  |
| 43    | 27    |
| hsa_c | hsa_c |
| irc_0 | irc_0 |
| 0302  | 0179  |
| 04    | 83    |
| hsa_c | hsa_c |
| irc_0 | irc_0 |
| 0302  | 0179  |
| 05    | 84    |
| hsa_c | hsa_c |
| irc_0 | irc_0 |
| 0302  | 0179  |
| 08    | 85    |
| hsa_c | hsa_c |
| irc_0 | irc_0 |
| 0302  | 0179  |
| 10    | 86    |
| hsa_c | hsa_c |

|       |       |
|-------|-------|
| irc_0 | irc_0 |
| 0302  | 0179  |
| 11    | 87    |
| hsa_c | hsa_c |
| irc_0 | irc_0 |
| 0302  | 0180  |
| 12    | 02    |
| hsa_c | hsa_c |
| irc_0 | irc_0 |
| 0302  | 0180  |
| 15    | 07    |
| hsa_c | hsa_c |
| irc_0 | irc_0 |
| 0302  | 0051  |
| 16    | 25    |
| hsa_c | hsa_c |
| irc_0 | irc_0 |
| 0302  | 0180  |
| 17    | 24    |
| hsa_c | hsa_c |
| irc_0 | irc_0 |
| 0302  | 0180  |
| 34    | 25    |
| hsa_c | hsa_c |
| irc_0 | irc_0 |
| 0302  | 0180  |
| 58    | 26    |
| hsa_c | hsa_c |
| irc_0 | irc_0 |
| 0303  | 0180  |
| 25    | 67    |
| hsa_c | hsa_c |
| irc_0 | irc_0 |
| 0305  | 0041  |
| 54    | 26    |
| hsa_c | hsa_c |
| irc_0 | irc_0 |
| 0305  | 0082  |
| 55    | 03    |
| hsa_c | hsa_c |
| irc_0 | irc_0 |
| 0305  | 0180  |
| 66    | 87    |
| hsa_c | hsa_c |
| irc_0 | irc_0 |
| 0306  | 0155  |
| 57    | 2     |
| hsa_c | hsa_c |
| irc_0 | irc_0 |
| 0306  | 0078  |
| 58    | 2     |
| hsa_c | hsa_c |
| irc_0 | irc_0 |
| 0306  | 0181  |
| 59    | 78    |

|       |       |
|-------|-------|
| hsa_c | hsa_c |
| irc_0 | irc_0 |
| 0306  | 0182  |
| 60    | 09    |
| hsa_c | hsa_c |
| irc_0 | irc_0 |
| 0306  | 0182  |
| 61    | 46    |
| hsa_c | hsa_c |
| irc_0 | irc_0 |
| 0306  | 0182  |
| 62    | 80    |
| hsa_c | hsa_c |
| irc_0 | irc_0 |
| 0307  | 0024  |
| 09    | 61    |
| hsa_c | hsa_c |
| irc_0 | irc_0 |
| 0307  | 0035  |
| 12    | 47    |
| hsa_c | hsa_c |
| irc_0 | irc_0 |
| 0311  | 0080  |
| 49    | 28    |
| hsa_c | hsa_c |
| irc_0 | irc_0 |
| 0311  | 0059  |
| 52    | 11    |
| hsa_c | hsa_c |
| irc_0 | irc_0 |
| 0311  | 0061  |
| 53    | 52    |
| hsa_c | hsa_c |
| irc_0 | irc_0 |
| 0311  | 0040  |
| 70    | 97    |
| hsa_c | hsa_c |
| irc_0 | irc_0 |
| 0311  | 0050  |
| 71    | 48    |
| hsa_c | hsa_c |
| irc_0 | irc_0 |
| 0311  | 0049  |
| 72    | 86    |
| hsa_c | hsa_c |
| irc_0 | irc_0 |
| 0311  | 0182  |
| 73    | 99    |
| hsa_c | hsa_c |
| irc_0 | irc_0 |
| 0311  | 0073  |
| 74    | 89    |
| hsa_c | hsa_c |
| irc_0 | irc_0 |
| 0311  | 0023  |

|       |       |
|-------|-------|
| 75    | 42    |
| hsa_c | hsa_c |
| irc_0 | irc_0 |
| 0311  | 0089  |
| 76    | 31    |
| hsa_c | hsa_c |
| irc_0 | irc_0 |
| 0311  | 0030  |
| 80    | 83    |
| hsa_c | hsa_c |
| irc_0 | irc_0 |
| 0311  | 0020  |
| 81    | 10    |
| hsa_c | hsa_c |
| irc_0 | irc_0 |
| 0311  | 0183  |
| 82    | 34    |
| hsa_c | hsa_c |
| irc_0 | irc_0 |
| 0311  | 0183  |
| 83    | 35    |
| hsa_c | hsa_c |
| irc_0 | irc_0 |
| 0314  | 0183  |
| 03    | 36    |
| hsa_c | hsa_c |
| irc_0 | irc_0 |
| 0314  | 0183  |
| 04    | 37    |
| hsa_c | hsa_c |
| irc_0 | irc_0 |
| 0315  | 0183  |
| 00    | 38    |
| hsa_c | hsa_c |
| irc_0 | irc_0 |
| 0315  | 0183  |
| 01    | 39    |
| hsa_c | hsa_c |
| irc_0 | irc_0 |
| 0315  | 0183  |
| 02    | 64    |
| hsa_c | hsa_c |
| irc_0 | irc_0 |
| 0315  | 0183  |
| 03    | 68    |
| hsa_c | hsa_c |
| irc_0 | irc_0 |
| 0315  | 0183  |
| 04    | 69    |
| hsa_c | hsa_c |
| irc_0 | irc_0 |
| 0315  | 0183  |
| 05    | 71    |
| hsa_c | hsa_c |

|       |       |
|-------|-------|
| irc_0 | irc_0 |
| 0315  | 0054  |
| 06    | 48    |
| hsa_c | hsa_c |
| irc_0 | irc_0 |
| 0315  | 0038  |
| 78    | 33    |
| hsa_c | hsa_c |
| irc_0 | irc_0 |
| 0317  | 0184  |
| 51    | 09    |
| hsa_c | hsa_c |
| irc_0 | irc_0 |
| 0317  | 0184  |
| 52    | 20    |
| hsa_c | hsa_c |
| irc_0 | irc_0 |
| 0317  | 0184  |
| 53    | 19    |
| hsa_c | hsa_c |
| irc_0 | irc_0 |
| 0028  | 0184  |
| 19    | 36    |
| hsa_c | hsa_c |
| irc_0 | irc_0 |
| 0036  | 0184  |
| 16    | 35    |
| hsa_c | hsa_c |
| irc_0 | irc_0 |
| 0036  | 0184  |
| 89    | 44    |
| hsa_c | hsa_c |
| irc_0 | irc_0 |
| 0052  | 0184  |
| 15    | 67    |
| hsa_c | hsa_c |
| irc_0 | irc_0 |
| 0060  | 0185  |
| 66    | 07    |
| hsa_c | hsa_c |
| irc_0 | irc_0 |
| 0080  | 0185  |
| 88    | 40    |
| hsa_c | hsa_c |
| irc_0 | irc_0 |
| 0088  | 0185  |
| 45    | 37    |
| hsa_c | hsa_c |
| irc_0 | irc_0 |
| 0090  | 0186  |
| 80    | 53    |
| hsa_c | hsa_c |
| irc_0 | irc_0 |
| 0317  | 0186  |
| 72    | 55    |

|       |       |
|-------|-------|
| hsa_c | hsa_c |
| irc_0 | irc_0 |
| 0318  | 0186  |
| 16    | 62    |
| hsa_c | hsa_c |
| irc_0 | irc_0 |
| 0029  | 0186  |
| 49    | 63    |
| hsa_c | hsa_c |
| irc_0 | irc_0 |
| 0318  | 0186  |
| 56    | 60    |
| hsa_c | hsa_c |
| irc_0 | irc_0 |
| 0318  | 0186  |
| 57    | 96    |
| hsa_c | hsa_c |
| irc_0 | irc_0 |
| 0318  | 0186  |
| 58    | 97    |
| hsa_c | hsa_c |
| irc_0 | irc_0 |
| 0318  | 0186  |
| 59    | 98    |
| hsa_c | hsa_c |
| irc_0 | irc_0 |
| 0318  | 0186  |
| 60    | 99    |
| hsa_c | hsa_c |
| irc_0 | irc_0 |
| 0318  | 0187  |
| 61    | 06    |
| hsa_c | hsa_c |
| irc_0 | irc_0 |
| 0318  | 0187  |
| 76    | 07    |
| hsa_c | hsa_c |
| irc_0 | irc_0 |
| 0047  | 0187  |
| 42    | 16    |
| hsa_c | hsa_c |
| irc_0 | irc_0 |
| 0081  | 0187  |
| 76    | 17    |
| hsa_c | hsa_c |
| irc_0 | irc_0 |
| 0319  | 0187  |
| 05    | 20    |
| hsa_c | hsa_c |
| irc_0 | irc_0 |
| 0319  | 0187  |
| 06    | 21    |
| hsa_c | hsa_c |
| irc_0 | irc_0 |
| 0319  | 0187  |

|       |       |
|-------|-------|
| 11    | 29    |
| hsa_c | hsa_c |
| irc_0 | irc_0 |
| 0319  | 0187  |
| 12    | 55    |
| hsa_c | hsa_c |
| irc_0 | irc_0 |
| 0319  | 0187  |
| 14    | 56    |
| hsa_c | hsa_c |
| irc_0 | irc_0 |
| 0319  | 0187  |
| 15    | 57    |
| hsa_c | hsa_c |
| irc_0 | irc_0 |
| 0319  | 0187  |
| 66    | 58    |
| hsa_c | hsa_c |
| irc_0 | irc_0 |
| 0319  | 0174  |
| 73    | 7     |
| hsa_c | hsa_c |
| irc_0 | irc_0 |
| 0319  | 0009  |
| 86    | 4     |
| hsa_c | hsa_c |
| irc_0 | irc_0 |
| 0026  | 0188  |
| 12    | 66    |
| hsa_c | hsa_c |
| irc_0 | irc_0 |
| 0319  | 0188  |
| 89    | 74    |
| hsa_c | hsa_c |
| irc_0 | irc_0 |
| 0319  | 0183  |
| 90    | 8     |
| hsa_c | hsa_c |
| irc_0 | irc_0 |
| 0319  | 0189  |
| 91    | 41    |
| hsa_c | hsa_c |
| irc_0 | irc_0 |
| 0319  | 0189  |
| 92    | 42    |
| hsa_c | hsa_c |
| irc_0 | irc_0 |
| 0320  | 0190  |
| 24    | 02    |
| hsa_c | hsa_c |
| irc_0 | irc_0 |
| 0320  | 0190  |
| 26    | 03    |
| hsa_c | hsa_c |

|       |       |
|-------|-------|
| irc_0 | irc_0 |
| 0320  | 0190  |
| 34    | 04    |
| hsa_c | hsa_c |
| irc_0 | irc_0 |
| 0320  | 0190  |
| 67    | 05    |
| hsa_c | hsa_c |
| irc_0 | irc_0 |
| 0320  | 0190  |
| 68    | 06    |
| hsa_c | hsa_c |
| irc_0 | irc_0 |
| 0320  | 0190  |
| 69    | 07    |
| hsa_c | hsa_c |
| irc_0 | irc_0 |
| 0320  | 0190  |
| 70    | 08    |
| hsa_c | hsa_c |
| irc_0 | irc_0 |
| 0320  | 0190  |
| 71    | 09    |
| hsa_c | hsa_c |
| irc_0 | irc_0 |
| 0320  | 0190  |
| 72    | 38    |
| hsa_c | hsa_c |
| irc_0 | irc_0 |
| 0321  | 0190  |
| 12    | 39    |
| hsa_c | hsa_c |
| irc_0 | irc_0 |
| 0321  | 0190  |
| 13    | 42    |
| hsa_c | hsa_c |
| irc_0 | irc_0 |
| 0321  | 0190  |
| 24    | 45    |
| hsa_c | hsa_c |
| irc_0 | irc_0 |
| 0321  | 0086  |
| 57    | 29    |
| hsa_c | hsa_c |
| irc_0 | irc_0 |
| 0321  | 0190  |
| 58    | 64    |
| hsa_c | hsa_c |
| irc_0 | irc_0 |
| 0322  | 0190  |
| 15    | 65    |
| hsa_c | hsa_c |
| irc_0 | irc_0 |
| 0322  | 0190  |
| 17    | 69    |



|       |       |
|-------|-------|
| hsa_c | hsa_c |
| irc_0 | irc_0 |
| 0322  | 0191  |
| 19    | 52    |
| hsa_c | hsa_c |
| irc_0 | irc_0 |
| 0322  | 0191  |
| 20    | 53    |
| hsa_c | hsa_c |
| irc_0 | irc_0 |
| 0322  | 0191  |
| 21    | 54    |
| hsa_c | hsa_c |
| irc_0 | irc_0 |
| 0322  | 0191  |
| 23    | 55    |
| hsa_c | hsa_c |
| irc_0 | irc_0 |
| 0322  | 0192  |
| 24    | 24    |
| hsa_c | hsa_c |
| irc_0 | irc_0 |
| 0322  | 0192  |
| 25    | 27    |
| hsa_c | hsa_c |
| irc_0 | irc_0 |
| 0322  | 0192  |
| 26    | 28    |
| hsa_c | hsa_c |
| irc_0 | irc_0 |
| 0322  | 0192  |
| 62    | 35    |
| hsa_c | hsa_c |
| irc_0 | irc_0 |
| 0323  | 0192  |
| 11    | 36    |
| hsa_c | hsa_c |
| irc_0 | irc_0 |
| 0323  | 0192  |
| 12    | 37    |
| hsa_c | hsa_c |
| irc_0 | irc_0 |
| 0323  | 0192  |
| 43    | 38    |
| hsa_c | hsa_c |
| irc_0 | irc_0 |
| 0323  | 0192  |
| 44    | 39    |
| hsa_c | hsa_c |
| irc_0 | irc_0 |
| 0059  | 0192  |
| 4     | 40    |
| hsa_c | hsa_c |
| irc_0 | irc_0 |
| 0067  | 0192  |

|       |       |
|-------|-------|
| 83    | 46    |
| hsa_c | hsa_c |
| irc_0 | irc_0 |
| 0066  | 0192  |
| 71    | 82    |
| hsa_c | hsa_c |
| irc_0 | irc_0 |
| 0325  | 0061  |
| 58    | 98    |
| hsa_c | hsa_c |
| irc_0 | irc_0 |
| 0325  | 0193  |
| 59    | 79    |
| hsa_c | hsa_c |
| irc_0 | irc_0 |
| 0325  | 0193  |
| 60    | 80    |
| hsa_c | hsa_c |
| irc_0 | irc_0 |
| 0325  | 0194  |
| 61    | 18    |
| hsa_c | hsa_c |
| irc_0 | irc_0 |
| 0325  | 0194  |
| 62    | 19    |
| hsa_c | hsa_c |
| irc_0 | irc_0 |
| 0325  | 0194  |
| 63    | 20    |
| hsa_c | hsa_c |
| irc_0 | irc_0 |
| 0325  | 0194  |
| 64    | 30    |
| hsa_c | hsa_c |
| irc_0 | irc_0 |
| 0325  | 0194  |
| 65    | 44    |
| hsa_c | hsa_c |
| irc_0 | irc_0 |
| 0326  | 0194  |
| 22    | 32    |
| hsa_c | hsa_c |
| irc_0 | irc_0 |
| 0326  | 0194  |
| 23    | 33    |
| hsa_c | hsa_c |
| irc_0 | irc_0 |
| 0326  | 0194  |
| 24    | 34    |
| hsa_c | hsa_c |
| irc_0 | irc_0 |
| 0106  | 0194  |
| 0     | 51    |
| hsa_c | hsa_c |

|       |       |
|-------|-------|
| irc_0 | irc_0 |
| 0038  | 0194  |
| 19    | 53    |
| hsa_c | hsa_c |
| irc_0 | irc_0 |
| 0052  | 0194  |
| 12    | 57    |
| hsa_c | hsa_c |
| irc_0 | irc_0 |
| 0052  | 0194  |
| 52    | 60    |
| hsa_c | hsa_c |
| irc_0 | irc_0 |
| 0052  | 0194  |
| 67    | 62    |
| hsa_c | hsa_c |
| irc_0 | irc_0 |
| 0327  | 0194  |
| 34    | 63    |
| hsa_c | hsa_c |
| irc_0 | irc_0 |
| 0327  | 0194  |
| 35    | 84    |
| hsa_c | hsa_c |
| irc_0 | irc_0 |
| 0327  | 0194  |
| 36    | 85    |
| hsa_c | hsa_c |
| irc_0 | irc_0 |
| 0327  | 0194  |
| 37    | 87    |
| hsa_c | hsa_c |
| irc_0 | irc_0 |
| 0327  | 0194  |
| 38    | 88    |
| hsa_c | hsa_c |
| irc_0 | irc_0 |
| 0327  | 0194  |
| 39    | 89    |
| hsa_c | hsa_c |
| irc_0 | irc_0 |
| 0327  | 0194  |
| 40    | 90    |
| hsa_c | hsa_c |
| irc_0 | irc_0 |
| 0327  | 0194  |
| 41    | 91    |
| hsa_c | hsa_c |
| irc_0 | irc_0 |
| 0327  | 0195  |
| 42    | 11    |
| hsa_c | hsa_c |
| irc_0 | irc_0 |
| 0327  | 0195  |
| 55    | 13    |

|       |       |
|-------|-------|
| hsa_c | hsa_c |
| irc_0 | irc_0 |
| 0041  | 0195  |
| 87    | 14    |
| hsa_c | hsa_c |
| irc_0 | irc_0 |
| 0067  | 0195  |
| 06    | 19    |
| hsa_c | hsa_c |
| irc_0 | irc_0 |
| 0077  | 0195  |
| 82    | 27    |
| hsa_c | hsa_c |
| irc_0 | irc_0 |
| 0327  | 0195  |
| 87    | 42    |
| hsa_c | hsa_c |
| irc_0 | irc_0 |
| 0327  | 0195  |
| 88    | 44    |
| hsa_c | hsa_c |
| irc_0 | irc_0 |
| 0327  | 0195  |
| 89    | 51    |
| hsa_c | hsa_c |
| irc_0 | irc_0 |
| 0327  | 0195  |
| 90    | 75    |
| hsa_c | hsa_c |
| irc_0 | irc_0 |
| 0327  | 0195  |
| 91    | 76    |
| hsa_c | hsa_c |
| irc_0 | irc_0 |
| 0328  | 0195  |
| 06    | 77    |
| hsa_c | hsa_c |
| irc_0 | irc_0 |
| 0328  | 0195  |
| 07    | 78    |
| hsa_c | hsa_c |
| irc_0 | irc_0 |
| 0328  | 0195  |
| 08    | 80    |
| hsa_c | hsa_c |
| irc_0 | irc_0 |
| 0329  | 0195  |
| 15    | 79    |
| hsa_c | hsa_c |
| irc_0 | irc_0 |
| 0329  | 0196  |
| 41    | 00    |
| hsa_c | hsa_c |
| irc_0 | irc_0 |
| 0329  | 0196  |

|       |       |
|-------|-------|
| 77    | 01    |
| hsa_c | hsa_c |
| irc_0 | irc_0 |
| 0330  | 0196  |
| 75    | 02    |
| hsa_c | hsa_c |
| irc_0 | irc_0 |
| 0330  | 0196  |
| 76    | 03    |
| hsa_c | hsa_c |
| irc_0 | irc_0 |
| 0330  | 0196  |
| 77    | 04    |
| hsa_c | hsa_c |
| irc_0 | irc_0 |
| 0330  | 0196  |
| 78    | 05    |
| hsa_c | hsa_c |
| irc_0 | irc_0 |
| 0330  | 0196  |
| 79    | 06    |
| hsa_c | hsa_c |
| irc_0 | irc_0 |
| 0330  | 0196  |
| 80    | 07    |
| hsa_c | hsa_c |
| irc_0 | irc_0 |
| 0330  | 0022  |
| 81    | 18    |
| hsa_c | hsa_c |
| irc_0 | irc_0 |
| 0335  | 0025  |
| 65    | 23    |
| hsa_c | hsa_c |
| irc_0 | irc_0 |
| 0335  | 0196  |
| 66    | 42    |
| hsa_c | hsa_c |
| irc_0 | irc_0 |
| 0335  | 0196  |
| 67    | 51    |
| hsa_c | hsa_c |
| irc_0 | irc_0 |
| 0335  | 0196  |
| 68    | 53    |
| hsa_c | hsa_c |
| irc_0 | irc_0 |
| 0335  | 0196  |
| 69    | 54    |
| hsa_c | hsa_c |
| irc_0 | irc_0 |
| 0335  | 0196  |
| 70    | 56    |
| hsa_c | hsa_c |

|       |       |
|-------|-------|
| irc_0 | irc_0 |
| 0335  | 0196  |
| 71    | 57    |
| hsa_c | hsa_c |
| irc_0 | irc_0 |
| 0335  | 0196  |
| 72    | 58    |
| hsa_c | hsa_c |
| irc_0 | irc_0 |
| 0340  | 0196  |
| 92    | 59    |
| hsa_c | hsa_c |
| irc_0 | irc_0 |
| 0341  | 0055  |
| 16    | 99    |
| hsa_c | hsa_c |
| irc_0 | irc_0 |
| 0341  | 0196  |
| 18    | 61    |
| hsa_c | hsa_c |
| irc_0 | irc_0 |
| 0341  | 0196  |
| 20    | 62    |
| hsa_c | hsa_c |
| irc_0 | irc_0 |
| 0341  | 0196  |
| 21    | 63    |
| hsa_c | hsa_c |
| irc_0 | irc_0 |
| 0341  | 0196  |
| 22    | 64    |
| hsa_c | hsa_c |
| irc_0 | irc_0 |
| 0341  | 0196  |
| 23    | 66    |
| hsa_c | hsa_c |
| irc_0 | irc_0 |
| 0341  | 0196  |
| 24    | 67    |
| hsa_c | hsa_c |
| irc_0 | irc_0 |
| 0341  | 0196  |
| 25    | 68    |
| hsa_c | hsa_c |
| irc_0 | irc_0 |
| 0341  | 0197  |
| 26    | 21    |
| hsa_c | hsa_c |
| irc_0 | irc_0 |
| 0341  | 0197  |
| 27    | 32    |
| hsa_c | hsa_c |
| irc_0 | irc_0 |
| 0341  | 0197  |
| 28    | 33    |

|       |       |
|-------|-------|
| hsa_c | hsa_c |
| irc_0 | irc_0 |
| 0341  | 0197  |
| 29    | 69    |
| hsa_c | hsa_c |
| irc_0 | irc_0 |
| 0341  | 0197  |
| 32    | 71    |
| hsa_c | hsa_c |
| irc_0 | irc_0 |
| 0341  | 0197  |
| 33    | 72    |
| hsa_c | hsa_c |
| irc_0 | irc_0 |
| 0341  | 0197  |
| 30    | 76    |
| hsa_c | hsa_c |
| irc_0 | irc_0 |
| 0341  | 0197  |
| 31    | 78    |
| hsa_c | hsa_c |
| irc_0 | irc_0 |
| 0341  | 0198  |
| 37    | 06    |
| hsa_c | hsa_c |
| irc_0 | irc_0 |
| 0341  | 0199  |
| 35    | 87    |
| hsa_c | hsa_c |
| irc_0 | irc_0 |
| 0923  | 0199  |
| 67    | 88    |
| hsa_c | hsa_c |
| irc_0 | irc_0 |
| 0341  | 0199  |
| 38    | 89    |
| hsa_c | hsa_c |
| irc_0 | irc_0 |
| 0341  | 0199  |
| 39    | 90    |
| hsa_c | hsa_c |
| irc_0 | irc_0 |
| 0156  | 0199  |
| 6     | 91    |
| hsa_c | hsa_c |
| irc_0 | irc_0 |
| 0341  | 0199  |
| 40    | 92    |
| hsa_c | hsa_c |
| irc_0 | irc_0 |
| 0343  | 0200  |
| 21    | 25    |
| hsa_c | hsa_c |
| irc_0 | irc_0 |
| 0343  | 0200  |

|       |       |
|-------|-------|
| 22    | 35    |
| hsa_c | hsa_c |
| irc_0 | irc_0 |
| 0343  | 0200  |
| 38    | 37    |
| hsa_c | hsa_c |
| irc_0 | irc_0 |
| 0050  | 0200  |
| 01    | 85    |
| hsa_c | hsa_c |
| irc_0 | irc_0 |
| 0344  | 0201  |
| 46    | 26    |
| hsa_c | hsa_c |
| irc_0 | irc_0 |
| 0344  | 0201  |
| 61    | 27    |
| hsa_c | hsa_c |
| irc_0 | irc_0 |
| 0344  | 0201  |
| 79    | 28    |
| hsa_c | hsa_c |
| irc_0 | irc_0 |
| 0344  | 0202  |
| 84    | 13    |
| hsa_c | hsa_c |
| irc_0 | irc_0 |
| 0344  | 0202  |
| 94    | 15    |
| hsa_c | hsa_c |
| irc_0 | irc_0 |
| 0345  | 0202  |
| 09    | 16    |
| hsa_c | hsa_c |
| irc_0 | irc_0 |
| 0345  | 0202  |
| 15    | 17    |
| hsa_c | hsa_c |
| irc_0 | irc_0 |
| 0345  | 0202  |
| 26    | 19    |
| hsa_c | hsa_c |
| irc_0 | irc_0 |
| 0345  | 0202  |
| 31    | 20    |
| hsa_c | hsa_c |
| irc_0 | irc_0 |
| 0345  | 0202  |
| 37    | 22    |
| hsa_c | hsa_c |
| irc_0 | irc_0 |
| 0345  | 0202  |
| 39    | 24    |
| hsa_c | hsa_c |



|       |       |
|-------|-------|
| irc_0 | irc_0 |
| 0345  | 0202  |
| 42    | 25    |
| hsa_c | hsa_c |
| irc_0 | irc_0 |
| 0345  | 0202  |
| 44    | 26    |
| hsa_c | hsa_c |
| irc_0 | irc_0 |
| 0345  | 0203  |
| 45    | 03    |
| hsa_c | hsa_c |
| irc_0 | irc_0 |
| 0345  | 0203  |
| 48    | 04    |
| hsa_c | hsa_c |
| irc_0 | irc_0 |
| 0345  | 0203  |
| 49    | 06    |
| hsa_c | hsa_c |
| irc_0 | irc_0 |
| 0349  | 0203  |
| 55    | 07    |
| hsa_c | hsa_c |
| irc_0 | irc_0 |
| 0349  | 0203  |
| 56    | 08    |
| hsa_c | hsa_c |
| irc_0 | irc_0 |
| 0349  | 0190  |
| 61    | 1     |
| hsa_c | hsa_c |
| irc_0 | irc_0 |
| 0349  | 0203  |
| 63    | 16    |
| hsa_c | hsa_c |
| irc_0 | irc_0 |
| 0349  | 0044  |
| 64    | 51    |
| hsa_c | hsa_c |
| irc_0 | irc_0 |
| 0349  | 0203  |
| 65    | 75    |
| hsa_c | hsa_c |
| irc_0 | irc_0 |
| 0349  | 0203  |
| 85    | 76    |
| hsa_c | hsa_c |
| irc_0 | irc_0 |
| 0349  | 0205  |
| 90    | 70    |
| hsa_c | hsa_c |
| irc_0 | irc_0 |
| 0349  | 0205  |
| 93    | 71    |

|       |       |
|-------|-------|
| hsa_c | hsa_c |
| irc_0 | irc_0 |
| 0349  | 0205  |
| 95    | 72    |
| hsa_c | hsa_c |
| irc_0 | irc_0 |
| 0349  | 0205  |
| 76    | 94    |
| hsa_c | hsa_c |
| irc_0 | irc_0 |
| 0349  | 0205  |
| 96    | 95    |
| hsa_c | hsa_c |
| irc_0 | irc_0 |
| 0349  | 0205  |
| 97    | 96    |
| hsa_c | hsa_c |
| irc_0 | irc_0 |
| 0349  | 0207  |
| 98    | 93    |
| hsa_c | hsa_c |
| irc_0 | irc_0 |
| 0349  | 0208  |
| 99    | 08    |
| hsa_c | hsa_c |
| irc_0 | irc_0 |
| 0350  | 0208  |
| 69    | 09    |
| hsa_c | hsa_c |
| irc_0 | irc_0 |
| 0350  | 0208  |
| 70    | 50    |
| hsa_c | hsa_c |
| irc_0 | irc_0 |
| 0350  | 0208  |
| 71    | 51    |
| hsa_c | hsa_c |
| irc_0 | irc_0 |
| 0350  | 0208  |
| 76    | 54    |
| hsa_c | hsa_c |
| irc_0 | irc_0 |
| 0350  | 0208  |
| 78    | 55    |
| hsa_c | hsa_c |
| irc_0 | irc_0 |
| 0350  | 0208  |
| 79    | 56    |
| hsa_c | hsa_c |
| irc_0 | irc_0 |
| 0350  | 0208  |

|       |       |
|-------|-------|
| 80    | 58    |
| hsa_c | hsa_c |
| irc_0 | irc_0 |
| 0350  | 0208  |
| 81    | 60    |
| hsa_c | hsa_c |
| irc_0 | irc_0 |
| 0350  | 0208  |
| 82    | 61    |
| hsa_c | hsa_c |
| irc_0 | irc_0 |
| 0350  | 0208  |
| 83    | 62    |
| hsa_c | hsa_c |
| irc_0 | irc_0 |
| 0350  | 0208  |
| 84    | 63    |
| hsa_c | hsa_c |
| irc_0 | irc_0 |
| 0353  | 0209  |
| 41    | 21    |
| hsa_c | hsa_c |
| irc_0 | irc_0 |
| 0353  | 0209  |
| 42    | 24    |
| hsa_c | hsa_c |
| irc_0 | irc_0 |
| 0353  | 0209  |
| 43    | 23    |
| hsa_c | hsa_c |
| irc_0 | irc_0 |
| 0353  | 0209  |
| 44    | 70    |
| hsa_c | hsa_c |
| irc_0 | irc_0 |
| 0353  | 0210  |
| 45    | 38    |
| hsa_c | hsa_c |
| irc_0 | irc_0 |
| 0354  | 0210  |
| 28    | 42    |
| hsa_c | hsa_c |
| irc_0 | irc_0 |
| 0354  | 0210  |
| 30    | 43    |
| hsa_c | hsa_c |
| irc_0 | irc_0 |
| 0354  | 0210  |
| 31    | 56    |
| hsa_c | hsa_c |
| irc_0 | irc_0 |
| 0354  | 0210  |
| 32    | 57    |
| hsa_c | hsa_c |

|       |       |
|-------|-------|
| irc_0 | irc_0 |
| 0354  | 0210  |
| 33    | 58    |
| hsa_c | hsa_c |
| irc_0 | irc_0 |
| 0019  | 0059  |
| 82    | 44    |
| hsa_c | hsa_c |
| irc_0 | irc_0 |
| 0354  | 0084  |
| 72    | 86    |
| hsa_c | hsa_c |
| irc_0 | irc_0 |
| 0354  | 0210  |
| 73    | 94    |
| hsa_c | hsa_c |
| irc_0 | irc_0 |
| 0354  | 0210  |
| 74    | 95    |
| hsa_c | hsa_c |
| irc_0 | irc_0 |
| 0354  | 0210  |
| 75    | 96    |
| hsa_c | hsa_c |
| irc_0 | irc_0 |
| 0354  | 0210  |
| 93    | 98    |
| hsa_c | hsa_c |
| irc_0 | irc_0 |
| 0354  | 0211  |
| 94    | 00    |
| hsa_c | hsa_c |
| irc_0 | irc_0 |
| 0354  | 0211  |
| 95    | 02    |
| hsa_c | hsa_c |
| irc_0 | irc_0 |
| 0354  | 0211  |
| 96    | 03    |
| hsa_c | hsa_c |
| irc_0 | irc_0 |
| 0354  | 0211  |
| 97    | 04    |
| hsa_c | hsa_c |
| irc_0 | irc_0 |
| 0354  | 0212  |
| 98    | 42    |
| hsa_c | hsa_c |
| irc_0 | irc_0 |
| 0354  | 0212  |
| 99    | 43    |
| hsa_c | hsa_c |
| irc_0 | irc_0 |
| 0355  | 0212  |
| 00    | 45    |

|       |       |
|-------|-------|
| hsa_c | hsa_c |
| irc_0 | irc_0 |
| 0355  | 0212  |
| 01    | 46    |
| hsa_c | hsa_c |
| irc_0 | irc_0 |
| 0201  | 0212  |
| 1     | 47    |
| hsa_c | hsa_c |
| irc_0 | irc_0 |
| 0356  | 0212  |
| 35    | 48    |
| hsa_c | hsa_c |
| irc_0 | irc_0 |
| 0356  | 0212  |
| 36    | 49    |
| hsa_c | hsa_c |
| irc_0 | irc_0 |
| 0356  | 0212  |
| 37    | 50    |
| hsa_c | hsa_c |
| irc_0 | irc_0 |
| 0356  | 0212  |
| 38    | 51    |
| hsa_c | hsa_c |
| irc_0 | irc_0 |
| 0356  | 0212  |
| 39    | 80    |
| hsa_c | hsa_c |
| irc_0 | irc_0 |
| 0358  | 0213  |
| 24    | 28    |
| hsa_c | hsa_c |
| irc_0 | irc_0 |
| 0358  | 0213  |
| 25    | 45    |
| hsa_c | hsa_c |
| irc_0 | irc_0 |
| 0358  | 0213  |
| 26    | 58    |
| hsa_c | hsa_c |
| irc_0 | irc_0 |
| 0358  | 0213  |
| 56    | 59    |
| hsa_c | hsa_c |
| irc_0 | irc_0 |
| 0358  | 0213  |
| 58    | 60    |
| hsa_c | hsa_c |
| irc_0 | irc_0 |
| 0360  | 0213  |
| 12    | 61    |
| hsa_c | hsa_c |
| irc_0 | irc_0 |
| 0050  | 0213  |

|       |       |
|-------|-------|
| 65    | 62    |
| hsa_c | hsa_c |
| irc_0 | irc_0 |
| 0360  | 0213  |
| 63    | 63    |
| hsa_c | hsa_c |
| irc_0 | irc_0 |
| 0360  | 0213  |
| 72    | 64    |
| hsa_c | hsa_c |
| irc_0 | irc_0 |
| 0360  | 0213  |
| 82    | 65    |
| hsa_c | hsa_c |
| irc_0 | irc_0 |
| 0361  | 0213  |
| 87    | 67    |
| hsa_c | hsa_c |
| irc_0 | irc_0 |
| 0361  | 0213  |
| 88    | 66    |
| hsa_c | hsa_c |
| irc_0 | irc_0 |
| 0361  | 0214  |
| 89    | 79    |
| hsa_c | hsa_c |
| irc_0 | irc_0 |
| 0361  | 0214  |
| 92    | 84    |
| hsa_c | hsa_c |
| irc_0 | irc_0 |
| 0361  | 0214  |
| 93    | 85    |
| hsa_c | hsa_c |
| irc_0 | irc_0 |
| 0361  | 0214  |
| 95    | 87    |
| hsa_c | hsa_c |
| irc_0 | irc_0 |
| 0361  | 0214  |
| 96    | 88    |
| hsa_c | hsa_c |
| irc_0 | irc_0 |
| 0362  | 0214  |
| 00    | 89    |
| hsa_c | hsa_c |
| irc_0 | irc_0 |
| 0362  | 0215  |
| 04    | 18    |
| hsa_c | hsa_c |
| irc_0 | irc_0 |
| 0362  | 0215  |
| 27    | 19    |
| hsa_c | hsa_c |

|       |       |
|-------|-------|
| irc_0 | irc_0 |
| 0362  | 0216  |
| 33    | 07    |
| hsa_c | hsa_c |
| irc_0 | irc_0 |
| 0362  | 0216  |
| 35    | 08    |
| hsa_c | hsa_c |
| irc_0 | irc_0 |
| 0362  | 0216  |
| 36    | 10    |
| hsa_c | hsa_c |
| irc_0 | irc_0 |
| 0362  | 0216  |
| 37    | 11    |
| hsa_c | hsa_c |
| irc_0 | irc_0 |
| 0362  | 0216  |
| 38    | 12    |
| hsa_c | hsa_c |
| irc_0 | irc_0 |
| 0362  | 0217  |
| 45    | 54    |
| hsa_c | hsa_c |
| irc_0 | irc_0 |
| 0362  | 0217  |
| 60    | 69    |
| hsa_c | hsa_c |
| irc_0 | irc_0 |
| 0363  | 0217  |
| 58    | 93    |
| hsa_c | hsa_c |
| irc_0 | irc_0 |
| 0364  | 0218  |
| 21    | 22    |
| hsa_c | hsa_c |
| irc_0 | irc_0 |
| 0364  | 0220  |
| 51    | 16    |
| hsa_c | hsa_c |
| irc_0 | irc_0 |
| 0364  | 0220  |
| 50    | 17    |
| hsa_c | hsa_c |
| irc_0 | irc_0 |
| 0366  | 0220  |
| 00    | 21    |
| hsa_c | hsa_c |
| irc_0 | irc_0 |
| 0366  | 0220  |
| 02    | 22    |
| hsa_c | hsa_c |
| irc_0 | irc_0 |
| 0366  | 0220  |
| 04    | 23    |

|       |       |
|-------|-------|
| hsa_c | hsa_c |
| irc_0 | irc_0 |
| 0366  | 0220  |
| 75    | 26    |
| hsa_c | hsa_c |
| irc_0 | irc_0 |
| 0366  | 0220  |
| 78    | 27    |
| hsa_c | hsa_c |
| irc_0 | irc_0 |
| 0366  | 0220  |
| 80    | 28    |
| hsa_c | hsa_c |
| irc_0 | irc_0 |
| 0366  | 0220  |
| 82    | 29    |
| hsa_c | hsa_c |
| irc_0 | irc_0 |
| 0366  | 0220  |
| 83    | 30    |
| hsa_c | hsa_c |
| irc_0 | irc_0 |
| 0366  | 0220  |
| 84    | 74    |
| hsa_c | hsa_c |
| irc_0 | irc_0 |
| 0366  | 0220  |
| 85    | 79    |
| hsa_c | hsa_c |
| irc_0 | irc_0 |
| 0366  | 0220  |
| 86    | 92    |
| hsa_c | hsa_c |
| irc_0 | irc_0 |
| 0366  | 0220  |
| 87    | 95    |
| hsa_c | hsa_c |
| irc_0 | irc_0 |
| 0367  | 0220  |
| 60    | 96    |
| hsa_c | hsa_c |
| irc_0 | irc_0 |
| 0367  | 0220  |
| 61    | 97    |
| hsa_c | hsa_c |
| irc_0 | irc_0 |
| 0367  | 0221  |
| 66    | 00    |
| hsa_c | hsa_c |
| irc_0 | irc_0 |
| 0367  | 0221  |
| 67    | 02    |
| hsa_c | hsa_c |
| irc_0 | irc_0 |



|       |       |
|-------|-------|
| 0367  | 0221  |
| 68    | 03    |
| hsa_c | hsa_c |
| irc_0 | irc_0 |
| 0367  | 0221  |
| 69    | 04    |
| hsa_c | hsa_c |
| irc_0 | irc_0 |
| 0367  | 0221  |
| 70    | 29    |
| hsa_c | hsa_c |
| irc_0 | irc_0 |
| 0367  | 0221  |
| 71    | 36    |
| hsa_c | hsa_c |
| irc_0 | irc_0 |
| 0367  | 0221  |
| 72    | 37    |
| hsa_c | hsa_c |
| irc_0 | irc_0 |
| 0190  | 0221  |
| 9     | 38    |
| hsa_c | hsa_c |
| irc_0 | irc_0 |
| 0367  | 0221  |
| 82    | 59    |
| hsa_c | hsa_c |
| irc_0 | irc_0 |
| 0367  | 0049  |
| 83    | 88    |
| hsa_c | hsa_c |
| irc_0 | irc_0 |
| 0367  | 0222  |
| 84    | 01    |
| hsa_c | hsa_c |
| irc_0 | irc_0 |
| 0369  | 0222  |
| 55    | 02    |
| hsa_c | hsa_c |
| irc_0 | irc_0 |
| 0370  | 0223  |
| 24    | 42    |
| hsa_c | hsa_c |
| irc_0 | irc_0 |
| 0370  | 0223  |
| 25    | 43    |
| hsa_c | hsa_c |
| irc_0 | irc_0 |
| 0370  | 0223  |
| 27    | 44    |
| hsa_c | hsa_c |
| irc_0 | irc_0 |
| 0370  | 0223  |
| 28    | 45    |

|       |       |
|-------|-------|
| hsa_c | hsa_c |
| irc_0 | irc_0 |
| 0370  | 0223  |
| 32    | 46    |
| hsa_c | hsa_c |
| irc_0 | irc_0 |
| 0370  | 0223  |
| 33    | 82    |
| hsa_c | hsa_c |
| irc_0 | irc_0 |
| 0370  | 0223  |
| 34    | 83    |
| hsa_c | hsa_c |
| irc_0 | irc_0 |
| 0370  | 0223  |
| 35    | 84    |
| hsa_c | hsa_c |
| irc_0 | irc_0 |
| 0370  | 0223  |
| 36    | 98    |
| hsa_c | hsa_c |
| irc_0 | irc_0 |
| 0370  | 0223  |
| 37    | 99    |
| hsa_c | hsa_c |
| irc_0 | irc_0 |
| 0370  | 0224  |
| 46    | 00    |
| hsa_c | hsa_c |
| irc_0 | irc_0 |
| 0371  | 0224  |
| 99    | 01    |
| hsa_c | hsa_c |
| irc_0 | irc_0 |
| 0372  | 0224  |
| 01    | 02    |
| hsa_c | hsa_c |
| irc_0 | irc_0 |
| 0373  | 0224  |
| 28    | 03    |
| hsa_c | hsa_c |
| irc_0 | irc_0 |
| 0375  | 0224  |
| 42    | 04    |
| hsa_c | hsa_c |
| irc_0 | irc_0 |
| 0375  | 0224  |
| 98    | 05    |
| hsa_c | hsa_c |
| irc_0 | irc_0 |
| 0376  | 0224  |
| 21    | 70    |
| hsa_c | hsa_c |
| irc_0 | irc_0 |
| 0376  | 0225  |

|       |       |
|-------|-------|
| 22    | 01    |
| hsa_c | hsa_c |
| irc_0 | irc_0 |
| 0376  | 0225  |
| 23    | 02    |
| hsa_c | hsa_c |
| irc_0 | irc_0 |
| 0376  | 0225  |
| 24    | 03    |
| hsa_c | hsa_c |
| irc_0 | irc_0 |
| 0376  | 0225  |
| 25    | 04    |
| hsa_c | hsa_c |
| irc_0 | irc_0 |
| 0376  | 0225  |
| 26    | 00    |
| hsa_c | hsa_c |
| irc_0 | irc_0 |
| 0376  | 0023  |
| 27    | 40    |
| hsa_c | hsa_c |
| irc_0 | irc_0 |
| 0376  | 0226  |
| 28    | 06    |
| hsa_c | hsa_c |
| irc_0 | irc_0 |
| 0376  | 0226  |
| 29    | 08    |
| hsa_c | hsa_c |
| irc_0 | irc_0 |
| 0376  | 0226  |
| 30    | 11    |
| hsa_c | hsa_c |
| irc_0 | irc_0 |
| 0376  | 0226  |
| 31    | 12    |
| hsa_c | hsa_c |
| irc_0 | irc_0 |
| 0376  | 0227  |
| 32    | 16    |
| hsa_c | hsa_c |
| irc_0 | irc_0 |
| 0376  | 0227  |
| 33    | 17    |
| hsa_c | hsa_c |
| irc_0 | irc_0 |
| 0376  | 0227  |
| 34    | 25    |
| hsa_c | hsa_c |
| irc_0 | irc_0 |
| 0376  | 0227  |
| 35    | 26    |
| hsa_c | hsa_c |

|       |       |
|-------|-------|
| irc_0 | irc_0 |
| 0376  | 0227  |
| 36    | 27    |
| hsa_c | hsa_c |
| irc_0 | irc_0 |
| 0376  | 0227  |
| 37    | 28    |
| hsa_c | hsa_c |
| irc_0 | irc_0 |
| 0376  | 0227  |
| 38    | 29    |
| hsa_c | hsa_c |
| irc_0 | irc_0 |
| 0376  | 0227  |
| 52    | 31    |
| hsa_c | hsa_c |
| irc_0 | irc_0 |
| 0376  | 0227  |
| 63    | 32    |
| hsa_c | hsa_c |
| irc_0 | irc_0 |
| 0376  | 0227  |
| 64    | 33    |
| hsa_c | hsa_c |
| irc_0 | irc_0 |
| 0376  | 0227  |
| 66    | 34    |
| hsa_c | hsa_c |
| irc_0 | irc_0 |
| 0376  | 0227  |
| 69    | 47    |
| hsa_c | hsa_c |
| irc_0 | irc_0 |
| 0376  | 0227  |
| 70    | 52    |
| hsa_c | hsa_c |
| irc_0 | irc_0 |
| 0376  | 0227  |
| 71    | 53    |
| hsa_c | hsa_c |
| irc_0 | irc_0 |
| 0376  | 0227  |
| 72    | 54    |
| hsa_c | hsa_c |
| irc_0 | irc_0 |
| 0376  | 0227  |
| 73    | 82    |
| hsa_c | hsa_c |
| irc_0 | irc_0 |
| 0376  | 0228  |
| 75    | 18    |
| hsa_c | hsa_c |
| irc_0 | irc_0 |
| 0376  | 0228  |
| 76    | 19    |

|       |       |
|-------|-------|
| hsa_c | hsa_c |
| irc_0 | irc_0 |
| 0376  | 0228  |
| 77    | 20    |
| hsa_c | hsa_c |
| irc_0 | irc_0 |
| 0376  | 0228  |
| 94    | 21    |
| hsa_c | hsa_c |
| irc_0 | irc_0 |
| 0379  | 0228  |
| 39    | 22    |
| hsa_c | hsa_c |
| irc_0 | irc_0 |
| 0379  | 0228  |
| 40    | 23    |
| hsa_c | hsa_c |
| irc_0 | irc_0 |
| 0379  | 0038  |
| 43    | 12    |
| hsa_c | hsa_c |
| irc_0 | irc_0 |
| 0379  | 0064  |
| 44    | 17    |
| hsa_c | hsa_c |
| irc_0 | irc_0 |
| 0379  | 0071  |
| 45    | 85    |
| hsa_c | hsa_c |
| irc_0 | irc_0 |
| 0051  | 0027  |
| 55    | 91    |
| hsa_c | hsa_c |
| irc_0 | irc_0 |
| 0379  | 0228  |
| 51    | 32    |
| hsa_c | hsa_c |
| irc_0 | irc_0 |
| 0379  | 0228  |
| 52    | 31    |
| hsa_c | hsa_c |
| irc_0 | irc_0 |
| 0379  | 0228  |
| 53    | 59    |
| hsa_c | hsa_c |
| irc_0 | irc_0 |
| 0379  | 0228  |
| 54    | 62    |
| hsa_c | hsa_c |
| irc_0 | irc_0 |
| 0379  | 0228  |
| 55    | 70    |
| hsa_c | hsa_c |
| irc_0 | irc_0 |
| 0379  | 0228  |

|       |       |
|-------|-------|
| 56    | 79    |
| hsa_c | hsa_c |
| irc_0 | irc_0 |
| 0379  | 0228  |
| 57    | 82    |
| hsa_c | hsa_c |
| irc_0 | irc_0 |
| 0379  | 0228  |
| 58    | 83    |
| hsa_c | hsa_c |
| irc_0 | irc_0 |
| 0379  | 0228  |
| 59    | 84    |
| hsa_c | hsa_c |
| irc_0 | irc_0 |
| 0034  | 0228  |
| 27    | 85    |
| hsa_c | hsa_c |
| irc_0 | irc_0 |
| 0034  | 0229  |
| 20    | 09    |
| hsa_c | hsa_c |
| irc_0 | irc_0 |
| 0054  | 0229  |
| 09    | 13    |
| hsa_c | hsa_c |
| irc_0 | irc_0 |
| 0079  | 0229  |
| 65    | 11    |
| hsa_c | hsa_c |
| irc_0 | irc_0 |
| 0382  | 0229  |
| 39    | 12    |
| hsa_c | hsa_c |
| irc_0 | irc_0 |
| 0382  | 0229  |
| 62    | 34    |
| hsa_c | hsa_c |
| irc_0 | irc_0 |
| 0382  | 0229  |
| 67    | 79    |
| hsa_c | hsa_c |
| irc_0 | irc_0 |
| 0382  | 0229  |
| 68    | 78    |
| hsa_c | hsa_c |
| irc_0 | irc_0 |
| 0382  | 0229  |
| 71    | 88    |
| hsa_c | hsa_c |
| irc_0 | irc_0 |
| 0382  | 0230  |
| 79    | 19    |
| hsa_c | hsa_c |

|       |       |
|-------|-------|
| irc_0 | irc_0 |
| 0382  | 0230  |
| 86    | 20    |
| hsa_c | hsa_c |
| irc_0 | irc_0 |
| 0382  | 0230  |
| 88    | 21    |
| hsa_c | hsa_c |
| irc_0 | irc_0 |
| 0382  | 0230  |
| 90    | 22    |
| hsa_c | hsa_c |
| irc_0 | irc_0 |
| 0382  | 0230  |
| 91    | 23    |
| hsa_c | hsa_c |
| irc_0 | irc_0 |
| 0382  | 0230  |
| 92    | 49    |
| hsa_c | hsa_c |
| irc_0 | irc_0 |
| 0383  | 0230  |
| 73    | 66    |
| hsa_c | hsa_c |
| irc_0 | irc_0 |
| 0384  | 0230  |
| 11    | 85    |
| hsa_c | hsa_c |
| irc_0 | irc_0 |
| 0384  | 0230  |
| 12    | 89    |
| hsa_c | hsa_c |
| irc_0 | irc_0 |
| 0384  | 0230  |
| 14    | 90    |
| hsa_c | hsa_c |
| irc_0 | irc_0 |
| 0053  | 0232  |
| 43    | 27    |
| hsa_c | hsa_c |
| irc_0 | irc_0 |
| 0384  | 0232  |
| 47    | 28    |
| hsa_c | hsa_c |
| irc_0 | irc_0 |
| 0384  | 0232  |
| 48    | 51    |
| hsa_c | hsa_c |
| irc_0 | irc_0 |
| 0384  | 0232  |
| 50    | 52    |
| hsa_c | hsa_c |
| irc_0 | irc_0 |
| 0385  | 0232  |
| 03    | 58    |

|       |       |
|-------|-------|
| hsa_c | hsa_c |
| irc_0 | irc_0 |
| 0385  | 0232  |
| 04    | 54    |
| hsa_c | hsa_c |
| irc_0 | irc_0 |
| 0385  | 0232  |
| 05    | 62    |
| hsa_c | hsa_c |
| irc_0 | irc_0 |
| 0385  | 0232  |
| 06    | 63    |
| hsa_c | hsa_c |
| irc_0 | irc_0 |
| 0385  | 0232  |
| 07    | 69    |
| hsa_c | hsa_c |
| irc_0 | irc_0 |
| 0385  | 0232  |
| 08    | 68    |
| hsa_c | hsa_c |
| irc_0 | irc_0 |
| 0385  | 0232  |
| 09    | 86    |
| hsa_c | hsa_c |
| irc_0 | irc_0 |
| 0385  | 0232  |
| 10    | 87    |
| hsa_c | hsa_c |
| irc_0 | irc_0 |
| 0385  | 0232  |
| 32    | 88    |
| hsa_c | hsa_c |
| irc_0 | irc_0 |
| 0385  | 0232  |
| 33    | 89    |
| hsa_c | hsa_c |
| irc_0 | irc_0 |
| 0385  | 0232  |
| 39    | 90    |
| hsa_c | hsa_c |
| irc_0 | irc_0 |
| 0385  | 0232  |
| 46    | 91    |
| hsa_c | hsa_c |
| irc_0 | irc_0 |
| 0385  | 0233  |
| 47    | 14    |
| hsa_c | hsa_c |
| irc_0 | irc_0 |
| 0386  | 0233  |
| 24    | 18    |
| hsa_c | hsa_c |
| irc_0 | irc_0 |
| 0386  | 0233  |



|       |       |
|-------|-------|
| 25    | 16    |
| hsa_c | hsa_c |
| irc_0 | irc_0 |
| 0386  | 0233  |
| 77    | 20    |
| hsa_c | hsa_c |
| irc_0 | irc_0 |
| 0386  | 0233  |
| 81    | 21    |
| hsa_c | hsa_c |
| irc_0 | irc_0 |
| 0387  | 0234  |
| 12    | 18    |
| hsa_c | hsa_c |
| irc_0 | irc_0 |
| 0387  | 0234  |
| 30    | 19    |
| hsa_c | hsa_c |
| irc_0 | irc_0 |
| 0387  | 0234  |
| 31    | 28    |
| hsa_c | hsa_c |
| irc_0 | irc_0 |
| 0387  | 0234  |
| 32    | 31    |
| hsa_c | hsa_c |
| irc_0 | irc_0 |
| 0387  | 0234  |
| 33    | 30    |
| hsa_c | hsa_c |
| irc_0 | irc_0 |
| 0387  | 0234  |
| 34    | 47    |
| hsa_c | hsa_c |
| irc_0 | irc_0 |
| 0387  | 0234  |
| 35    | 48    |
| hsa_c | hsa_c |
| irc_0 | irc_0 |
| 0387  | 0234  |
| 36    | 49    |
| hsa_c | hsa_c |
| irc_0 | irc_0 |
| 0030  | 0234  |
| 96    | 50    |
| hsa_c | hsa_c |
| irc_0 | irc_0 |
| 0390  | 0075  |
| 21    | 06    |
| hsa_c | hsa_c |
| irc_0 | irc_0 |
| 0040  | 0234  |
| 82    | 53    |
| hsa_c | hsa_c |

|       |       |
|-------|-------|
| irc_0 | irc_0 |
| 0388  | 0234  |
| 92    | 61    |
| hsa_c | hsa_c |
| irc_0 | irc_0 |
| 0388  | 0234  |
| 93    | 62    |
| hsa_c | hsa_c |
| irc_0 | irc_0 |
| 0388  | 0023  |
| 94    | 83    |
| hsa_c | hsa_c |
| irc_0 | irc_0 |
| 0388  | 0234  |
| 95    | 70    |
| hsa_c | hsa_c |
| irc_0 | irc_0 |
| 0388  | 0234  |
| 96    | 71    |
| hsa_c | hsa_c |
| irc_0 | irc_0 |
| 0389  | 0235  |
| 07    | 79    |
| hsa_c | hsa_c |
| irc_0 | irc_0 |
| 0389  | 0235  |
| 08    | 80    |
| hsa_c | hsa_c |
| irc_0 | irc_0 |
| 0389  | 0235  |
| 09    | 81    |
| hsa_c | hsa_c |
| irc_0 | irc_0 |
| 0389  | 0236  |
| 10    | 68    |
| hsa_c | hsa_c |
| irc_0 | irc_0 |
| 0077  | 0236  |
| 42    | 73    |
| hsa_c | hsa_c |
| irc_0 | irc_0 |
| 0389  | 0236  |
| 64    | 74    |
| hsa_c | hsa_c |
| irc_0 | irc_0 |
| 0390  | 0237  |
| 36    | 18    |
| hsa_c | hsa_c |
| irc_0 | irc_0 |
| 0390  | 0237  |
| 37    | 20    |
| hsa_c | hsa_c |
| irc_0 | irc_0 |
| 0390  | 0237  |
| 88    | 21    |

|       |       |
|-------|-------|
| hsa_c | hsa_c |
| irc_0 | irc_0 |
| 0390  | 0237  |
| 95    | 22    |
| hsa_c | hsa_c |
| irc_0 | irc_0 |
| 0390  | 0237  |
| 98    | 31    |
| hsa_c | hsa_c |
| irc_0 | irc_0 |
| 0391  | 0237  |
| 09    | 23    |
| hsa_c | hsa_c |
| irc_0 | irc_0 |
| 0391  | 0237  |
| 23    | 30    |
| hsa_c | hsa_c |
| irc_0 | irc_0 |
| 0391  | 0237  |
| 24    | 25    |
| hsa_c | hsa_c |
| irc_0 | irc_0 |
| 0391  | 0237  |
| 92    | 26    |
| hsa_c | hsa_c |
| irc_0 | irc_0 |
| 0392  | 0237  |
| 13    | 27    |
| hsa_c | hsa_c |
| irc_0 | irc_0 |
| 0393  | 0237  |
| 54    | 54    |
| hsa_c | hsa_c |
| irc_0 | irc_0 |
| 0393  | 0036  |
| 55    | 15    |
| hsa_c | hsa_c |
| irc_0 | irc_0 |
| 0393  | 0077  |
| 56    | 67    |
| hsa_c | hsa_c |
| irc_0 | irc_0 |
| 0393  | 0237  |
| 57    | 63    |
| hsa_c | hsa_c |
| irc_0 | irc_0 |
| 0393  | 0237  |
| 58    | 64    |
| hsa_c | hsa_c |
| irc_0 | irc_0 |
| 0393  | 0237  |
| 59    | 65    |
| hsa_c | hsa_c |
| irc_0 | irc_0 |
| 0394  | 0237  |

|       |       |
|-------|-------|
| 67    | 66    |
| hsa_c | hsa_c |
| irc_0 | irc_0 |
| 0394  | 0237  |
| 68    | 67    |
| hsa_c | hsa_c |
| irc_0 | irc_0 |
| 0394  | 0237  |
| 69    | 68    |
| hsa_c | hsa_c |
| irc_0 | irc_0 |
| 0394  | 0237  |
| 70    | 69    |
| hsa_c | hsa_c |
| irc_0 | irc_0 |
| 0396  | 0237  |
| 02    | 73    |
| hsa_c | hsa_c |
| irc_0 | irc_0 |
| 0397  | 0090  |
| 23    | 16    |
| hsa_c | hsa_c |
| irc_0 | irc_0 |
| 0397  | 0239  |
| 24    | 97    |
| hsa_c | hsa_c |
| irc_0 | irc_0 |
| 0091  | 0239  |
| 67    | 98    |
| hsa_c | hsa_c |
| irc_0 | irc_0 |
| 0398  | 0239  |
| 58    | 99    |
| hsa_c | hsa_c |
| irc_0 | irc_0 |
| 0398  | 0240  |
| 61    | 00    |
| hsa_c | hsa_c |
| irc_0 | irc_0 |
| 0399  | 0240  |
| 73    | 01    |
| hsa_c | hsa_c |
| irc_0 | irc_0 |
| 0399  | 0240  |
| 74    | 02    |
| hsa_c | hsa_c |
| irc_0 | irc_0 |
| 0401  | 0240  |
| 53    | 03    |
| hsa_c | hsa_c |
| irc_0 | irc_0 |
| 0402  | 0240  |
| 47    | 10    |
| hsa_c | hsa_c |

|       |       |
|-------|-------|
| irc_0 | irc_0 |
| 0402  | 0240  |
| 50    | 11    |
| hsa_c | hsa_c |
| irc_0 | irc_0 |
| 0402  | 0240  |
| 61    | 13    |
| hsa_c | hsa_c |
| irc_0 | irc_0 |
| 0402  | 0240  |
| 77    | 14    |
| hsa_c | hsa_c |
| irc_0 | irc_0 |
| 0402  | 0240  |
| 81    | 89    |
| hsa_c | hsa_c |
| irc_0 | irc_0 |
| 0402  | 0241  |
| 93    | 49    |
| hsa_c | hsa_c |
| irc_0 | irc_0 |
| 0402  | 0241  |
| 95    | 50    |
| hsa_c | hsa_c |
| irc_0 | irc_0 |
| 0403  | 0241  |
| 37    | 51    |
| hsa_c | hsa_c |
| irc_0 | irc_0 |
| 0403  | 0242  |
| 65    | 68    |
| hsa_c | hsa_c |
| irc_0 | irc_0 |
| 0033  | 0242  |
| 15    | 69    |
| hsa_c | hsa_c |
| irc_0 | irc_0 |
| 0404  | 0242  |
| 56    | 70    |
| hsa_c | hsa_c |
| irc_0 | irc_0 |
| 0404  | 0242  |
| 59    | 71    |
| hsa_c | hsa_c |
| irc_0 | irc_0 |
| 0404  | 0242  |
| 60    | 72    |
| hsa_c | hsa_c |
| irc_0 | irc_0 |
| 0404  | 0243  |
| 61    | 31    |
| hsa_c | hsa_c |
| irc_0 | irc_0 |
| 0404  | 0243  |
| 62    | 32    |

|       |       |
|-------|-------|
| hsa_c | hsa_c |
| irc_0 | irc_0 |
| 0404  | 0089  |
| 63    | 18    |
| hsa_c | hsa_c |
| irc_0 | irc_0 |
| 0404  | 0244  |
| 74    | 97    |
| hsa_c | hsa_c |
| irc_0 | irc_0 |
| 0404  | 0244  |
| 75    | 99    |
| hsa_c | hsa_c |
| irc_0 | irc_0 |
| 0404  | 0245  |
| 76    | 00    |
| hsa_c | hsa_c |
| irc_0 | irc_0 |
| 0404  | 0245  |
| 77    | 01    |
| hsa_c | hsa_c |
| irc_0 | irc_0 |
| 0404  | 0245  |
| 78    | 02    |
| hsa_c | hsa_c |
| irc_0 | irc_0 |
| 0404  | 0245  |
| 79    | 40    |
| hsa_c | hsa_c |
| irc_0 | irc_0 |
| 0405  | 0245  |
| 04    | 43    |
| hsa_c | hsa_c |
| irc_0 | irc_0 |
| 0405  | 0245  |
| 08    | 44    |
| hsa_c | hsa_c |
| irc_0 | irc_0 |
| 0405  | 0033  |
| 09    | 91    |
| hsa_c | hsa_c |
| irc_0 | irc_0 |
| 0405  | 0075  |
| 10    | 75    |
| hsa_c | hsa_c |
| irc_0 | irc_0 |
| 0405  | 0246  |
| 11    | 97    |
| hsa_c | hsa_c |
| irc_0 | irc_0 |
| 0405  | 0246  |
| 12    | 98    |
| hsa_c | hsa_c |
| irc_0 | irc_0 |
| 0405  | 0246  |

|       |       |
|-------|-------|
| 66    | 99    |
| hsa_c | hsa_c |
| irc_0 | irc_0 |
| 0406  | 0247  |
| 59    | 00    |
| hsa_c | hsa_c |
| irc_0 | irc_0 |
| 0406  | 0247  |
| 60    | 01    |
| hsa_c | hsa_c |
| irc_0 | irc_0 |
| 0407  | 0247  |
| 34    | 02    |
| hsa_c | hsa_c |
| irc_0 | irc_0 |
| 0407  | 0247  |
| 35    | 03    |
| hsa_c | hsa_c |
| irc_0 | irc_0 |
| 0407  | 0247  |
| 37    | 04    |
| hsa_c | hsa_c |
| irc_0 | irc_0 |
| 0407  | 0047  |
| 75    | 98    |
| hsa_c | hsa_c |
| irc_0 | irc_0 |
| 0407  | 0062  |
| 76    | 39    |
| hsa_c | hsa_c |
| irc_0 | irc_0 |
| 0407  | 0247  |
| 78    | 24    |
| hsa_c | hsa_c |
| irc_0 | irc_0 |
| 0407  | 0247  |
| 79    | 25    |
| hsa_c | hsa_c |
| irc_0 | irc_0 |
| 0407  | 0247  |
| 80    | 26    |
| hsa_c | hsa_c |
| irc_0 | irc_0 |
| 0408  | 0247  |
| 92    | 27    |
| hsa_c | hsa_c |
| irc_0 | irc_0 |
| 0408  | 0247  |
| 93    | 28    |
| hsa_c | hsa_c |
| irc_0 | irc_0 |
| 0408  | 0247  |
| 94    | 93    |
| hsa_c | hsa_c |

|       |       |
|-------|-------|
| irc_0 | irc_0 |
| 0408  | 0020  |
| 95    | 19    |
| hsa_c | hsa_c |
| irc_0 | irc_0 |
| 0409  | 0020  |
| 23    | 20    |
| hsa_c | hsa_c |
| irc_0 | irc_0 |
| 0409  | 0248  |
| 25    | 21    |
| hsa_c | hsa_c |
| irc_0 | irc_0 |
| 0409  | 0029  |
| 22    | 84    |
| hsa_c | hsa_c |
| irc_0 | irc_0 |
| 0409  | 0057  |
| 78    | 90    |
| hsa_c | hsa_c |
| irc_0 | irc_0 |
| 0409  | 0248  |
| 79    | 38    |
| hsa_c | hsa_c |
| irc_0 | irc_0 |
| 0049  | 0248  |
| 31    | 41    |
| hsa_c | hsa_c |
| irc_0 | irc_0 |
| 0411  | 0248  |
| 77    | 42    |
| hsa_c | hsa_c |
| irc_0 | irc_0 |
| 0411  | 0248  |
| 80    | 43    |
| hsa_c | hsa_c |
| irc_0 | irc_0 |
| 0079  | 0248  |
| 19    | 86    |
| hsa_c | hsa_c |
| irc_0 | irc_0 |
| 0411  | 0248  |
| 81    | 87    |
| hsa_c | hsa_c |
| irc_0 | irc_0 |
| 0411  | 0248  |
| 83    | 88    |
| hsa_c | hsa_c |
| irc_0 | irc_0 |
| 0412  | 0249  |
| 75    | 21    |
| hsa_c | hsa_c |
| irc_0 | irc_0 |
| 0412  | 0249  |
| 76    | 22    |



|       |       |
|-------|-------|
| hsa_c | hsa_c |
| irc_0 | irc_0 |
| 0412  | 0070  |
| 77    | 35    |
| hsa_c | hsa_c |
| irc_0 | irc_0 |
| 0412  | 0250  |
| 82    | 48    |
| hsa_c | hsa_c |
| irc_0 | irc_0 |
| 0412  | 0250  |
| 86    | 78    |
| hsa_c | hsa_c |
| irc_0 | irc_0 |
| 0412  | 0250  |
| 87    | 80    |
| hsa_c | hsa_c |
| irc_0 | irc_0 |
| 0412  | 0250  |
| 89    | 81    |
| hsa_c | hsa_c |
| irc_0 | irc_0 |
| 0412  | 0250  |
| 92    | 82    |
| hsa_c | hsa_c |
| irc_0 | irc_0 |
| 0412  | 0250  |
| 94    | 84    |
| hsa_c | hsa_c |
| irc_0 | irc_0 |
| 0413  | 0250  |
| 05    | 85    |
| hsa_c | hsa_c |
| irc_0 | irc_0 |
| 0413  | 0250  |
| 07    | 86    |
| hsa_c | hsa_c |
| irc_0 | irc_0 |
| 0413  | 0250  |
| 08    | 87    |
| hsa_c | hsa_c |
| irc_0 | irc_0 |
| 0413  | 0250  |
| 09    | 88    |
| hsa_c | hsa_c |
| irc_0 | irc_0 |
| 0413  | 0250  |
| 11    | 91    |
| hsa_c | hsa_c |
| irc_0 | irc_0 |
| 0413  | 0251  |
| 12    | 49    |
| hsa_c | hsa_c |
| irc_0 | irc_0 |
| 0413  | 0251  |

|       |       |
|-------|-------|
| 13    | 50    |
| hsa_c | hsa_c |
| irc_0 | irc_0 |
| 0413  | 0251  |
| 14    | 55    |
| hsa_c | hsa_c |
| irc_0 | irc_0 |
| 0413  | 0251  |
| 15    | 57    |
| hsa_c | hsa_c |
| irc_0 | irc_0 |
| 0413  | 0251  |
| 16    | 58    |
| hsa_c | hsa_c |
| irc_0 | irc_0 |
| 0413  | 0251  |
| 42    | 59    |
| hsa_c | hsa_c |
| irc_0 | irc_0 |
| 0413  | 0251  |
| 43    | 60    |
| hsa_c | hsa_c |
| irc_0 | irc_0 |
| 0413  | 0251  |
| 44    | 61    |
| hsa_c | hsa_c |
| irc_0 | irc_0 |
| 0413  | 0251  |
| 67    | 62    |
| hsa_c | hsa_c |
| irc_0 | irc_0 |
| 0414  | 0251  |
| 23    | 63    |
| hsa_c | hsa_c |
| irc_0 | irc_0 |
| 0414  | 0252  |
| 30    | 14    |
| hsa_c | hsa_c |
| irc_0 | irc_0 |
| 0414  | 0252  |
| 34    | 60    |
| hsa_c | hsa_c |
| irc_0 | irc_0 |
| 0414  | 0252  |
| 35    | 61    |
| hsa_c | hsa_c |
| irc_0 | irc_0 |
| 0414  | 0252  |
| 36    | 62    |
| hsa_c | hsa_c |
| irc_0 | irc_0 |
| 0414  | 0252  |
| 40    | 63    |
| hsa_c | hsa_c |

|       |       |
|-------|-------|
| irc_0 | irc_0 |
| 0028  | 0253  |
| 99    | 25    |
| hsa_c | hsa_c |
| irc_0 | irc_0 |
| 0414  | 0253  |
| 83    | 27    |
| hsa_c | hsa_c |
| irc_0 | irc_0 |
| 0414  | 0253  |
| 84    | 38    |
| hsa_c | hsa_c |
| irc_0 | irc_0 |
| 0415  | 0253  |
| 22    | 39    |
| hsa_c | hsa_c |
| irc_0 | irc_0 |
| 0416  | 0253  |
| 20    | 40    |
| hsa_c | hsa_c |
| irc_0 | irc_0 |
| 0416  | 0023  |
| 21    | 73    |
| hsa_c | hsa_c |
| irc_0 | irc_0 |
| 0416  | 0254  |
| 22    | 11    |
| hsa_c | hsa_c |
| irc_0 | irc_0 |
| 0416  | 0254  |
| 23    | 12    |
| hsa_c | hsa_c |
| irc_0 | irc_0 |
| 0416  | 0254  |
| 24    | 13    |
| hsa_c | hsa_c |
| irc_0 | irc_0 |
| 0416  | 0254  |
| 25    | 14    |
| hsa_c | hsa_c |
| irc_0 | irc_0 |
| 0416  | 0254  |
| 28    | 95    |
| hsa_c | hsa_c |
| irc_0 | irc_0 |
| 0416  | 0255  |
| 29    | 04    |
| hsa_c | hsa_c |
| irc_0 | irc_0 |
| 0416  | 0255  |
| 49    | 05    |
| hsa_c | hsa_c |
| irc_0 | irc_0 |
| 0416  | 0255  |
| 50    | 06    |

|       |       |
|-------|-------|
| hsa_c | hsa_c |
| irc_0 | irc_0 |
| 0417  | 0255  |
| 41    | 07    |
| hsa_c | hsa_c |
| irc_0 | irc_0 |
| 0417  | 0256  |
| 42    | 04    |
| hsa_c | hsa_c |
| irc_0 | irc_0 |
| 0417  | 0256  |
| 43    | 24    |
| hsa_c | hsa_c |
| irc_0 | irc_0 |
| 0418  | 0256  |
| 41    | 35    |
| hsa_c | hsa_c |
| irc_0 | irc_0 |
| 0418  | 0052  |
| 42    | 34    |
| hsa_c | hsa_c |
| irc_0 | irc_0 |
| 0418  | 0090  |
| 52    | 17    |
| hsa_c | hsa_c |
| irc_0 | irc_0 |
| 0418  | 0257  |
| 93    | 33    |
| hsa_c | hsa_c |
| irc_0 | irc_0 |
| 0418  | 0257  |
| 94    | 34    |
| hsa_c | hsa_c |
| irc_0 | irc_0 |
| 0418  | 0104  |
| 95    | 2     |
| hsa_c | hsa_c |
| irc_0 | irc_0 |
| 0418  | 0257  |
| 96    | 38    |
| hsa_c | hsa_c |
| irc_0 | irc_0 |
| 0418  | 0257  |
| 97    | 40    |
| hsa_c | hsa_c |
| irc_0 | irc_0 |
| 0418  | 0257  |
| 98    | 41    |
| hsa_c | hsa_c |
| irc_0 | irc_0 |
| 0419  | 0067  |
| 95    | 42    |
| hsa_c | hsa_c |
| irc_0 | irc_0 |
| 0419  | 0202  |

|       |       |
|-------|-------|
| 98    | 7     |
| hsa_c | hsa_c |
| irc_0 | irc_0 |
| 0419  | 0257  |
| 99    | 49    |
| hsa_c | hsa_c |
| irc_0 | irc_0 |
| 0420  | 0257  |
| 01    | 56    |
| hsa_c | hsa_c |
| irc_0 | irc_0 |
| 0420  | 0257  |
| 02    | 57    |
| hsa_c | hsa_c |
| irc_0 | irc_0 |
| 0420  | 0257  |
| 03    | 58    |
| hsa_c | hsa_c |
| irc_0 | irc_0 |
| 0420  | 0257  |
| 05    | 59    |
| hsa_c | hsa_c |
| irc_0 | irc_0 |
| 0420  | 0257  |
| 06    | 60    |
| hsa_c | hsa_c |
| irc_0 | irc_0 |
| 0421  | 0257  |
| 13    | 61    |
| hsa_c | hsa_c |
| irc_0 | irc_0 |
| 0078  | 0257  |
| 32    | 62    |
| hsa_c | hsa_c |
| irc_0 | irc_0 |
| 0421  | 0257  |
| 19    | 63    |
| hsa_c | hsa_c |
| irc_0 | irc_0 |
| 0421  | 0257  |
| 20    | 64    |
| hsa_c | hsa_c |
| irc_0 | irc_0 |
| 0421  | 0257  |
| 46    | 83    |
| hsa_c | hsa_c |
| irc_0 | irc_0 |
| 0421  | 0257  |
| 47    | 85    |
| hsa_c | hsa_c |
| irc_0 | irc_0 |
| 0421  | 0257  |
| 48    | 95    |
| hsa_c | hsa_c |

|       |       |
|-------|-------|
| irc_0 | irc_0 |
| 0421  | 0104  |
| 49    | 4     |
| hsa_c | hsa_c |
| irc_0 | irc_0 |
| 0421  | 0259  |
| 50    | 21    |
| hsa_c | hsa_c |
| irc_0 | irc_0 |
| 0424  | 0259  |
| 08    | 52    |
| hsa_c | hsa_c |
| irc_0 | irc_0 |
| 0424  | 0259  |
| 09    | 53    |
| hsa_c | hsa_c |
| irc_0 | irc_0 |
| 0424  | 0259  |
| 10    | 54    |
| hsa_c | hsa_c |
| irc_0 | irc_0 |
| 0424  | 0259  |
| 15    | 55    |
| hsa_c | hsa_c |
| irc_0 | irc_0 |
| 0424  | 0259  |
| 19    | 57    |
| hsa_c | hsa_c |
| irc_0 | irc_0 |
| 0424  | 0259  |
| 21    | 58    |
| hsa_c | hsa_c |
| irc_0 | irc_0 |
| 0427  | 0259  |
| 30    | 88    |
| hsa_c | hsa_c |
| irc_0 | irc_0 |
| 0427  | 0259  |
| 74    | 89    |
| hsa_c | hsa_c |
| irc_0 | irc_0 |
| 0034  | 0259  |
| 22    | 90    |
| hsa_c | hsa_c |
| irc_0 | irc_0 |
| 0046  | 0259  |
| 59    | 91    |
| hsa_c | hsa_c |
| irc_0 | irc_0 |
| 0071  | 0259  |
| 94    | 92    |
| hsa_c | hsa_c |
| irc_0 | irc_0 |
| 0055  | 0259  |
| 65    | 96    |

|       |       |
|-------|-------|
| hsa_c | hsa_c |
| irc_0 | irc_0 |
| 0430  | 0259  |
| 22    | 97    |
| hsa_c | hsa_c |
| irc_0 | irc_0 |
| 0430  | 0259  |
| 26    | 98    |
| hsa_c | hsa_c |
| irc_0 | irc_0 |
| 0430  | 0260  |
| 27    | 82    |
| hsa_c | hsa_c |
| irc_0 | irc_0 |
| 0430  | 0260  |
| 28    | 83    |
| hsa_c | hsa_c |
| irc_0 | irc_0 |
| 0430  | 0261  |
| 29    | 14    |
| hsa_c | hsa_c |
| irc_0 | irc_0 |
| 0430  | 0261  |
| 30    | 16    |
| hsa_c | hsa_c |
| irc_0 | irc_0 |
| 0430  | 0261  |
| 31    | 17    |
| hsa_c | hsa_c |
| irc_0 | irc_0 |
| 0432  | 0261  |
| 01    | 48    |
| hsa_c | hsa_c |
| irc_0 | irc_0 |
| 0432  | 0261  |
| 02    | 61    |
| hsa_c | hsa_c |
| irc_0 | irc_0 |
| 0432  | 0261  |
| 20    | 78    |
| hsa_c | hsa_c |
| irc_0 | irc_0 |
| 0432  | 0261  |
| 25    | 79    |
| hsa_c | hsa_c |
| irc_0 | irc_0 |
| 0432  | 0261  |
| 26    | 80    |
| hsa_c | hsa_c |
| irc_0 | irc_0 |
| 0432  | 0262  |
| 27    | 02    |
| hsa_c | hsa_c |
| irc_0 | irc_0 |
| 0432  | 0262  |

|       |       |
|-------|-------|
| 28    | 03    |
| hsa_c | hsa_c |
| irc_0 | irc_0 |
| 0432  | 0262  |
| 31    | 04    |
| hsa_c | hsa_c |
| irc_0 | irc_0 |
| 0432  | 0262  |
| 32    | 05    |
| hsa_c | hsa_c |
| irc_0 | irc_0 |
| 0432  | 0262  |
| 34    | 08    |
| hsa_c | hsa_c |
| irc_0 | irc_0 |
| 0432  | 0262  |
| 35    | 09    |
| hsa_c | hsa_c |
| irc_0 | irc_0 |
| 0432  | 0262  |
| 36    | 42    |
| hsa_c | hsa_c |
| irc_0 | irc_0 |
| 0432  | 0262  |
| 37    | 45    |
| hsa_c | hsa_c |
| irc_0 | irc_0 |
| 0432  | 0262  |
| 38    | 46    |
| hsa_c | hsa_c |
| irc_0 | irc_0 |
| 0432  | 0262  |
| 39    | 47    |
| hsa_c | hsa_c |
| irc_0 | irc_0 |
| 0433  | 0262  |
| 87    | 48    |
| hsa_c | hsa_c |
| irc_0 | irc_0 |
| 0433  | 0262  |
| 90    | 49    |
| hsa_c | hsa_c |
| irc_0 | irc_0 |
| 0434  | 0262  |
| 11    | 50    |
| hsa_c | hsa_c |
| irc_0 | irc_0 |
| 0434  | 0262  |
| 12    | 51    |
| hsa_c | hsa_c |
| irc_0 | irc_0 |
| 0434  | 0262  |
| 99    | 52    |
| hsa_c | hsa_c |



|       |       |
|-------|-------|
| irc_0 | irc_0 |
| 0435  | 0262  |
| 34    | 53    |
| hsa_c | hsa_c |
| irc_0 | irc_0 |
| 0435  | 0263  |
| 35    | 03    |
| hsa_c | hsa_c |
| irc_0 | irc_0 |
| 0435  | 0263  |
| 36    | 07    |
| hsa_c | hsa_c |
| irc_0 | irc_0 |
| 0435  | 0263  |
| 37    | 10    |
| hsa_c | hsa_c |
| irc_0 | irc_0 |
| 0435  | 0264  |
| 38    | 75    |
| hsa_c | hsa_c |
| irc_0 | irc_0 |
| 0435  | 0264  |
| 39    | 76    |
| hsa_c | hsa_c |
| irc_0 | irc_0 |
| 0435  | 0264  |
| 40    | 80    |
| hsa_c | hsa_c |
| irc_0 | irc_0 |
| 0435  | 0265  |
| 41    | 77    |
| hsa_c | hsa_c |
| irc_0 | irc_0 |
| 0435  | 0265  |
| 43    | 79    |
| hsa_c | hsa_c |
| irc_0 | irc_0 |
| 0435  | 0265  |
| 45    | 91    |
| hsa_c | hsa_c |
| irc_0 | irc_0 |
| 0435  | 0266  |
| 47    | 10    |
| hsa_c | hsa_c |
| irc_0 | irc_0 |
| 0435  | 0266  |
| 48    | 11    |
| hsa_c | hsa_c |
| irc_0 | irc_0 |
| 0435  | 0266  |
| 49    | 12    |
| hsa_c | hsa_c |
| irc_0 | irc_0 |
| 0072  | 0266  |
| 48    | 14    |

|       |       |
|-------|-------|
| hsa_c | hsa_c |
| irc_0 | irc_0 |
| 0436  | 0266  |
| 92    | 15    |
| hsa_c | hsa_c |
| irc_0 | irc_0 |
| 0436  | 0266  |
| 93    | 16    |
| hsa_c | hsa_c |
| irc_0 | irc_0 |
| 0436  | 0266  |
| 94    | 17    |
| hsa_c | hsa_c |
| irc_0 | irc_0 |
| 0436  | 0266  |
| 95    | 18    |
| hsa_c | hsa_c |
| irc_0 | irc_0 |
| 0436  | 0266  |
| 96    | 19    |
| hsa_c | hsa_c |
| irc_0 | irc_0 |
| 0438  | 0266  |
| 00    | 21    |
| hsa_c | hsa_c |
| irc_0 | irc_0 |
| 0438  | 0266  |
| 01    | 23    |
| hsa_c | hsa_c |
| irc_0 | irc_0 |
| 0438  | 0266  |
| 02    | 24    |
| hsa_c | hsa_c |
| irc_0 | irc_0 |
| 0438  | 0266  |
| 03    | 26    |
| hsa_c | hsa_c |
| irc_0 | irc_0 |
| 0438  | 0266  |
| 05    | 27    |
| hsa_c | hsa_c |
| irc_0 | irc_0 |
| 0438  | 0266  |
| 06    | 35    |
| hsa_c | hsa_c |
| irc_0 | irc_0 |
| 0438  | 0266  |
| 07    | 71    |
| hsa_c | hsa_c |
| irc_0 | irc_0 |
| 0438  | 0266  |
| 08    | 72    |
| hsa_c | hsa_c |
| irc_0 | irc_0 |
| 0438  | 0266  |

|       |       |
|-------|-------|
| 09    | 91    |
| hsa_c | hsa_c |
| irc_0 | irc_0 |
| 0438  | 0266  |
| 10    | 92    |
| hsa_c | hsa_c |
| irc_0 | irc_0 |
| 0438  | 0267  |
| 11    | 36    |
| hsa_c | hsa_c |
| irc_0 | irc_0 |
| 0438  | 0267  |
| 75    | 37    |
| hsa_c | hsa_c |
| irc_0 | irc_0 |
| 0438  | 0267  |
| 77    | 38    |
| hsa_c | hsa_c |
| irc_0 | irc_0 |
| 0438  | 0267  |
| 78    | 39    |
| hsa_c | hsa_c |
| irc_0 | irc_0 |
| 0438  | 0267  |
| 79    | 40    |
| hsa_c | hsa_c |
| irc_0 | irc_0 |
| 0438  | 0267  |
| 80    | 44    |
| hsa_c | hsa_c |
| irc_0 | irc_0 |
| 0438  | 0267  |
| 81    | 45    |
| hsa_c | hsa_c |
| irc_0 | irc_0 |
| 0438  | 0267  |
| 82    | 46    |
| hsa_c | hsa_c |
| irc_0 | irc_0 |
| 0438  | 0267  |
| 85    | 52    |
| hsa_c | hsa_c |
| irc_0 | irc_0 |
| 0438  | 0267  |
| 86    | 53    |
| hsa_c | hsa_c |
| irc_0 | irc_0 |
| 0438  | 0267  |
| 88    | 83    |
| hsa_c | hsa_c |
| irc_0 | irc_0 |
| 0438  | 0268  |
| 89    | 03    |
| hsa_c | hsa_c |

|       |       |
|-------|-------|
| irc_0 | irc_0 |
| 0439  | 0268  |
| 24    | 97    |
| hsa_c | hsa_c |
| irc_0 | irc_0 |
| 0439  | 0269  |
| 25    | 23    |
| hsa_c | hsa_c |
| irc_0 | irc_0 |
| 0439  | 0269  |
| 34    | 24    |
| hsa_c | hsa_c |
| irc_0 | irc_0 |
| 0439  | 0269  |
| 38    | 25    |
| hsa_c | hsa_c |
| irc_0 | irc_0 |
| 0439  | 0269  |
| 39    | 26    |
| hsa_c | hsa_c |
| irc_0 | irc_0 |
| 0439  | 0269  |
| 40    | 27    |
| hsa_c | hsa_c |
| irc_0 | irc_0 |
| 0439  | 0269  |
| 41    | 28    |
| hsa_c | hsa_c |
| irc_0 | irc_0 |
| 0439  | 0269  |
| 42    | 29    |
| hsa_c | hsa_c |
| irc_0 | irc_0 |
| 0439  | 0269  |
| 43    | 91    |
| hsa_c | hsa_c |
| irc_0 | irc_0 |
| 0439  | 0269  |
| 44    | 92    |
| hsa_c | hsa_c |
| irc_0 | irc_0 |
| 0439  | 0269  |
| 46    | 93    |
| hsa_c | hsa_c |
| irc_0 | irc_0 |
| 0439  | 0269  |
| 48    | 94    |
| hsa_c | hsa_c |
| irc_0 | irc_0 |
| 0439  | 0269  |
| 51    | 95    |
| hsa_c | hsa_c |
| irc_0 | irc_0 |
| 0439  | 0269  |
| 56    | 96    |

|       |        |
|-------|--------|
| hsa_c | hsa_c  |
| irc_0 | irc_0  |
| 0439  | 0269   |
| 57    | 97     |
| hsa_c | hsa_c  |
| irc_0 | irc_0  |
| 0439  | 0271   |
| 58    | 00     |
| hsa_c | hsa_c  |
| irc_0 | irc_0  |
| 0439  | 0271   |
| 80    | 01     |
| hsa_c | hsa_c  |
| irc_0 | irc_0  |
| 0439  | 0271   |
| 90    | 05     |
| hsa_c | hsa_c  |
| irc_0 | irc_0  |
| 0439  | 0271   |
| 95    | 03     |
| hsa_c | hsa_c  |
| irc_0 | irc_0  |
| 0441  | 0271   |
| 42    | 04     |
| hsa_c | hsa_c  |
| irc_0 | irc_0  |
| 0441  | 0271   |
| 78    | 28     |
| hsa_c | hsa_c  |
| irc_0 | irc_0  |
| 0441  | 0272   |
| 79    | 42     |
| hsa_c | sa_cir |
| irc_0 | c_002  |
| 0441  | 7245   |
| 81    |        |
| hsa_c | hsa_c  |
| irc_0 | irc_0  |
| 0029  | 0272   |
| 60    | 46     |
| hsa_c | hsa_c  |
| irc_0 | irc_0  |
| 0044  | 0272   |
| 22    | 51     |
| hsa_c | hsa_c  |
| irc_0 | irc_0  |
| 0059  | 0272   |
| 40    | 52     |
| hsa_c | hsa_c  |
| irc_0 | irc_0  |
| 0441  | 0272   |
| 82    | 53     |
| hsa_c | hsa_c  |
| irc_0 | irc_0  |
| 0441  | 0272   |

|       |       |
|-------|-------|
| 83    | 54    |
| hsa_c | hsa_c |
| irc_0 | irc_0 |
| 0441  | 0273  |
| 84    | 04    |
| hsa_c | hsa_c |
| irc_0 | irc_0 |
| 0441  | 0273  |
| 85    | 05    |
| hsa_c | hsa_c |
| irc_0 | irc_0 |
| 0441  | 0273  |
| 86    | 23    |
| hsa_c | hsa_c |
| irc_0 | irc_0 |
| 0441  | 0273  |
| 87    | 24    |
| hsa_c | hsa_c |
| irc_0 | irc_0 |
| 0443  | 0273  |
| 30    | 82    |
| hsa_c | hsa_c |
| irc_0 | irc_0 |
| 0072  | 0273  |
| 93    | 83    |
| hsa_c | hsa_c |
| irc_0 | irc_0 |
| 0075  | 0273  |
| 65    | 95    |
| hsa_c | hsa_c |
| irc_0 | irc_0 |
| 0443  | 0044  |
| 46    | 48    |
| hsa_c | hsa_c |
| irc_0 | irc_0 |
| 0443  | 0274  |
| 47    | 89    |
| hsa_c | hsa_c |
| irc_0 | irc_0 |
| 0443  | 0274  |
| 48    | 91    |
| hsa_c | hsa_c |
| irc_0 | irc_0 |
| 0443  | 0274  |
| 62    | 92    |
| hsa_c | hsa_c |
| irc_0 | irc_0 |
| 0443  | 0274  |
| 98    | 93    |
| hsa_c | hsa_c |
| irc_0 | irc_0 |
| 0444  | 0274  |
| 01    | 94    |
| hsa_c | hsa_c |

|        |       |
|--------|-------|
| irc_0  | irc_0 |
| 0444   | 0137  |
| 03     | 1     |
| hsa_c  | hsa_c |
| irc_0  | irc_0 |
| 0444   | 0275  |
| 04     | 17    |
| hsa_c  | hsa_c |
| irc_0  | irc_0 |
| 0445   | 0275  |
| 79     | 19    |
| hsa_c  | hsa_c |
| irc_0  | irc_0 |
| 0445   | 0275  |
| 80     | 20    |
| hsa_c  | hsa_c |
| irc_0  | irc_0 |
| 0445   | 0275  |
| 81     | 21    |
| hsa_c  | hsa_c |
| irc_0  | irc_0 |
| 0445   | 0275  |
| 97     | 22    |
| hsa_c  | hsa_c |
| irc_0  | irc_0 |
| 0445   | 0275  |
| 94     | 23    |
| sa_cir | hsa_c |
| c_004  | irc_0 |
| 4710   | 0275  |
|        | 24    |
| hsa_c  | hsa_c |
| irc_0  | irc_0 |
| 0447   | 0275  |
| 12     | 32    |
| hsa_c  | hsa_c |
| irc_0  | irc_0 |
| 0447   | 0275  |
| 14     | 33    |
| hsa_c  | hsa_c |
| irc_0  | irc_0 |
| 0447   | 0275  |
| 15     | 66    |
| hsa_c  | hsa_c |
| irc_0  | irc_0 |
| 0447   | 0275  |
| 16     | 67    |
| hsa_c  | hsa_c |
| irc_0  | irc_0 |
| 0447   | 0275  |
| 17     | 68    |
| hsa_c  | hsa_c |
| irc_0  | irc_0 |
| 0447   | 0275  |
| 18     | 73    |

|       |       |
|-------|-------|
| hsa_c | hsa_c |
| irc_0 | irc_0 |
| 0447  | 0275  |
| 19    | 76    |
| hsa_c | hsa_c |
| irc_0 | irc_0 |
| 0447  | 0276  |
| 23    | 73    |
| hsa_c | hsa_c |
| irc_0 | irc_0 |
| 0447  | 0276  |
| 32    | 80    |
| hsa_c | hsa_c |
| irc_0 | irc_0 |
| 0447  | 0276  |
| 33    | 89    |
| hsa_c | hsa_c |
| irc_0 | irc_0 |
| 0447  | 0276  |
| 49    | 90    |
| hsa_c | hsa_c |
| irc_0 | irc_0 |
| 0447  | 0276  |
| 50    | 92    |
| hsa_c | hsa_c |
| irc_0 | irc_0 |
| 0447  | 0276  |
| 51    | 93    |
| hsa_c | hsa_c |
| irc_0 | irc_0 |
| 0447  | 0276  |
| 52    | 94    |
| hsa_c | hsa_c |
| irc_0 | irc_0 |
| 0447  | 0276  |
| 53    | 96    |
| hsa_c | hsa_c |
| irc_0 | irc_0 |
| 0447  | 0277  |
| 57    | 04    |
| hsa_c | hsa_c |
| irc_0 | irc_0 |
| 0448  | 0277  |
| 55    | 11    |
| hsa_c | hsa_c |
| irc_0 | irc_0 |
| 0448  | 0277  |
| 62    | 71    |
| hsa_c | hsa_c |
| irc_0 | irc_0 |
| 0448  | 0277  |
| 64    | 80    |
| hsa_c | hsa_c |
| irc_0 | irc_0 |
| 0448  | 0277  |



|       |       |
|-------|-------|
| 65    | 82    |
| hsa_c | hsa_c |
| irc_0 | irc_0 |
| 0448  | 0278  |
| 92    | 29    |
| hsa_c | hsa_c |
| irc_0 | irc_0 |
| 0448  | 0278  |
| 93    | 30    |
| hsa_c | hsa_c |
| irc_0 | irc_0 |
| 0450  | 0278  |
| 27    | 32    |
| hsa_c | hsa_c |
| irc_0 | irc_0 |
| 0450  | 0278  |
| 28    | 33    |
| hsa_c | hsa_c |
| irc_0 | irc_0 |
| 0450  | 0278  |
| 29    | 81    |
| hsa_c | hsa_c |
| irc_0 | irc_0 |
| 0450  | 0278  |
| 63    | 84    |
| hsa_c | hsa_c |
| irc_0 | irc_0 |
| 0450  | 0278  |
| 66    | 88    |
| hsa_c | hsa_c |
| irc_0 | irc_0 |
| 0450  | 0278  |
| 67    | 89    |
| hsa_c | hsa_c |
| irc_0 | irc_0 |
| 0450  | 0278  |
| 68    | 90    |
| hsa_c | hsa_c |
| irc_0 | irc_0 |
| 0450  | 0278  |
| 69    | 91    |
| hsa_c | hsa_c |
| irc_0 | irc_0 |
| 0450  | 0278  |
| 70    | 93    |
| hsa_c | hsa_c |
| irc_0 | irc_0 |
| 0450  | 0278  |
| 71    | 95    |
| hsa_c | hsa_c |
| irc_0 | irc_0 |
| 0450  | 0278  |
| 72    | 92    |

|       |       |
|-------|-------|
| hsa_c | hsa_c |
| irc_0 | irc_0 |
| 0450  | 0279  |
| 73    | 65    |
| hsa_c | hsa_c |
| irc_0 | irc_0 |
| 0450  | 0279  |
| 74    | 88    |
| hsa_c | hsa_c |
| irc_0 | irc_0 |
| 0450  | 0280  |
| 76    | 23    |
| hsa_c | hsa_c |
| irc_0 | irc_0 |
| 0450  | 0280  |
| 77    | 47    |
| hsa_c | hsa_c |
| irc_0 | irc_0 |
| 0450  | 0280  |
| 78    | 49    |
| hsa_c | hsa_c |
| irc_0 | irc_0 |
| 0450  | 0280  |
| 79    | 51    |
| hsa_c | hsa_c |
| irc_0 | irc_0 |
| 0450  | 0280  |
| 80    | 52    |
| hsa_c | hsa_c |
| irc_0 | irc_0 |
| 0450  | 0280  |
| 81    | 53    |
| hsa_c | hsa_c |
| irc_0 | irc_0 |
| 0450  | 0026  |
| 82    | 78    |
| hsa_c | hsa_c |
| irc_0 | irc_0 |
| 0450  | 0047  |
| 83    | 15    |
| hsa_c | hsa_c |
| irc_0 | irc_0 |
| 0450  | 0068  |
| 84    | 52    |
| hsa_c | hsa_c |
| irc_0 | irc_0 |
| 0450  | 0080  |
| 85    | 92    |
| hsa_c | hsa_c |
| irc_0 | irc_0 |
| 0452  | 0280  |
| 21    | 62    |

|       |       |
|-------|-------|
| hsa_c | hsa_c |
| irc_0 | irc_0 |
| 0075  | 0280  |
| 34    | 63    |
| hsa_c | hsa_c |
| irc_0 | irc_0 |
| 0452  | 0280  |
| 22    | 64    |
| hsa_c | hsa_c |
| irc_0 | irc_0 |
| 0452  | 0280  |
| 23    | 65    |
| hsa_c | hsa_c |
| irc_0 | irc_0 |
| 0452  | 0280  |
| 24    | 66    |
| hsa_c | hsa_c |
| irc_0 | irc_0 |
| 0452  | 0280  |
| 25    | 67    |
| hsa_c | hsa_c |
| irc_0 | irc_0 |
| 0452  | 0216  |
| 26    | 7     |
| hsa_c | hsa_c |
| irc_0 | irc_0 |
| 0453  | 0281  |
| 35    | 02    |
| hsa_c | hsa_c |
| irc_0 | irc_0 |
| 0453  | 0281  |
| 69    | 08    |
| hsa_c | hsa_c |
| irc_0 | irc_0 |
| 0453  | 0281  |
| 70    | 10    |
| hsa_c | hsa_c |
| irc_0 | irc_0 |
| 0453  | 0281  |
| 91    | 11    |
| hsa_c | hsa_c |
| irc_0 | irc_0 |
| 0454  | 0026  |
| 23    | 28    |
| hsa_c | hsa_c |
| irc_0 | irc_0 |
| 0454  | 0281  |
| 26    | 70    |
| hsa_c | hsa_c |
| irc_0 | irc_0 |
| 0454  | 0281  |
| 27    | 73    |
| hsa_c | hsa_c |
| irc_0 | irc_0 |
| 0454  | 0281  |

|       |       |
|-------|-------|
| 28    | 74    |
| hsa_c | hsa_c |
| irc_0 | irc_0 |
| 0454  | 0281  |
| 37    | 75    |
| hsa_c | hsa_c |
| irc_0 | irc_0 |
| 0454  | 0281  |
| 42    | 76    |
| hsa_c | hsa_c |
| irc_0 | irc_0 |
| 0454  | 0281  |
| 44    | 77    |
| hsa_c | hsa_c |
| irc_0 | irc_0 |
| 0454  | 0283  |
| 45    | 09    |
| hsa_c | hsa_c |
| irc_0 | irc_0 |
| 0454  | 0283  |
| 87    | 11    |
| hsa_c | hsa_c |
| irc_0 | irc_0 |
| 0455  | 0283  |
| 21    | 12    |
| hsa_c | hsa_c |
| irc_0 | irc_0 |
| 0456  | 0283  |
| 17    | 13    |
| hsa_c | hsa_c |
| irc_0 | irc_0 |
| 0456  | 0283  |
| 22    | 14    |
| hsa_c | hsa_c |
| irc_0 | irc_0 |
| 0456  | 0283  |
| 23    | 15    |
| hsa_c | hsa_c |
| irc_0 | irc_0 |
| 0456  | 0283  |
| 24    | 16    |
| hsa_c | hsa_c |
| irc_0 | irc_0 |
| 0456  | 0034  |
| 67    | 25    |
| hsa_c | hsa_c |
| irc_0 | irc_0 |
| 0456  | 0041  |
| 70    | 86    |
| hsa_c | hsa_c |
| irc_0 | irc_0 |
| 0456  | 0284  |
| 72    | 17    |
| hsa_c | hsa_c |

|       |       |
|-------|-------|
| irc_0 | irc_0 |
| 0456  | 0284  |
| 73    | 18    |
| hsa_c | hsa_c |
| irc_0 | irc_0 |
| 0456  | 0284  |
| 74    | 19    |
| hsa_c | hsa_c |
| irc_0 | irc_0 |
| 0456  | 0284  |
| 75    | 20    |
| hsa_c | hsa_c |
| irc_0 | irc_0 |
| 0457  | 0284  |
| 82    | 21    |
| hsa_c | hsa_c |
| irc_0 | irc_0 |
| 0458  | 0284  |
| 30    | 22    |
| hsa_c | hsa_c |
| irc_0 | irc_0 |
| 0459  | 0284  |
| 18    | 23    |
| hsa_c | hsa_c |
| irc_0 | irc_0 |
| 0459  | 0284  |
| 19    | 24    |
| hsa_c | hsa_c |
| irc_0 | irc_0 |
| 0459  | 0284  |
| 45    | 71    |
| hsa_c | hsa_c |
| irc_0 | irc_0 |
| 0459  | 0285  |
| 67    | 32    |
| hsa_c | hsa_c |
| irc_0 | irc_0 |
| 0460  | 0285  |
| 45    | 49    |
| hsa_c | hsa_c |
| irc_0 | irc_0 |
| 0460  | 0285  |
| 96    | 50    |
| hsa_c | hsa_c |
| irc_0 | irc_0 |
| 0461  | 0285  |
| 39    | 51    |
| hsa_c | hsa_c |
| irc_0 | irc_0 |
| 0461  | 0285  |
| 38    | 52    |
| hsa_c | hsa_c |
| irc_0 | irc_0 |
| 0052  | 0285  |
| 21    | 58    |

|       |       |
|-------|-------|
| hsa_c | hsa_c |
| irc_0 | irc_0 |
| 0461  | 0285  |
| 58    | 59    |
| hsa_c | hsa_c |
| irc_0 | irc_0 |
| 0461  | 0285  |
| 59    | 53    |
| hsa_c | hsa_c |
| irc_0 | irc_0 |
| 0461  | 0285  |
| 60    | 54    |
| hsa_c | hsa_c |
| irc_0 | irc_0 |
| 0461  | 0285  |
| 61    | 55    |
| hsa_c | hsa_c |
| irc_0 | irc_0 |
| 0461  | 0285  |
| 69    | 56    |
| hsa_c | hsa_c |
| irc_0 | irc_0 |
| 0461  | 0285  |
| 70    | 57    |
| hsa_c | hsa_c |
| irc_0 | irc_0 |
| 0461  | 0285  |
| 71    | 89    |
| hsa_c | hsa_c |
| irc_0 | irc_0 |
| 0461  | 0285  |
| 72    | 90    |
| hsa_c | hsa_c |
| irc_0 | irc_0 |
| 0461  | 0290  |
| 73    | 24    |
| hsa_c | hsa_c |
| irc_0 | irc_0 |
| 0461  | 0292  |
| 74    | 03    |
| hsa_c | hsa_c |
| irc_0 | irc_0 |
| 0461  | 0292  |
| 75    | 04    |
| hsa_c | hsa_c |
| irc_0 | irc_0 |
| 0461  | 0292  |
| 76    | 89    |
| hsa_c | hsa_c |
| irc_0 | irc_0 |
| 0461  | 0294  |
| 79    | 38    |
| hsa_c | hsa_c |
| irc_0 | irc_0 |
| 0461  | 0294  |

|       |       |
|-------|-------|
| 80    | 39    |
| hsa_c | hsa_c |
| irc_0 | irc_0 |
| 0461  | 0294  |
| 81    | 40    |
| hsa_c | hsa_c |
| irc_0 | irc_0 |
| 0461  | 0294  |
| 84    | 41    |
| hsa_c | hsa_c |
| irc_0 | irc_0 |
| 0461  | 0294  |
| 85    | 55    |
| hsa_c | hsa_c |
| irc_0 | irc_0 |
| 0461  | 0294  |
| 86    | 56    |
| hsa_c | hsa_c |
| irc_0 | irc_0 |
| 0461  | 0294  |
| 87    | 57    |
| hsa_c | hsa_c |
| irc_0 | irc_0 |
| 0461  | 0294  |
| 88    | 58    |
| hsa_c | hsa_c |
| irc_0 | irc_0 |
| 0461  | 0294  |
| 89    | 82    |
| hsa_c | hsa_c |
| irc_0 | irc_0 |
| 0461  | 0294  |
| 90    | 83    |
| hsa_c | hsa_c |
| irc_0 | irc_0 |
| 0461  | 0294  |
| 91    | 89    |
| hsa_c | hsa_c |
| irc_0 | irc_0 |
| 0461  | 0294  |
| 94    | 90    |
| hsa_c | hsa_c |
| irc_0 | irc_0 |
| 0461  | 0294  |
| 95    | 91    |
| hsa_c | hsa_c |
| irc_0 | irc_0 |
| 0461  | 0294  |
| 96    | 92    |
| hsa_c | hsa_c |
| irc_0 | irc_0 |
| 0461  | 0294  |
| 97    | 93    |
| hsa_c | hsa_c |

|       |       |
|-------|-------|
| irc_0 | irc_0 |
| 0461  | 0294  |
| 98    | 94    |
| hsa_c | hsa_c |
| irc_0 | irc_0 |
| 0461  | 0294  |
| 99    | 95    |
| hsa_c | hsa_c |
| irc_0 | irc_0 |
| 0462  | 0294  |
| 00    | 96    |
| hsa_c | hsa_c |
| irc_0 | irc_0 |
| 0462  | 0294  |
| 01    | 97    |
| hsa_c | hsa_c |
| irc_0 | irc_0 |
| 0063  | 0294  |
| 3     | 98    |
| hsa_c | hsa_c |
| irc_0 | irc_0 |
| 0462  | 0294  |
| 95    | 99    |
| hsa_c | hsa_c |
| irc_0 | irc_0 |
| 0462  | 0064  |
| 96    | 81    |
| hsa_c | hsa_c |
| irc_0 | irc_0 |
| 0462  | 0068  |
| 97    | 33    |
| hsa_c | hsa_c |
| irc_0 | irc_0 |
| 0463  | 0080  |
| 31    | 07    |
| hsa_c | hsa_c |
| irc_0 | irc_0 |
| 0463  | 0296  |
| 32    | 49    |
| hsa_c | hsa_c |
| irc_0 | irc_0 |
| 0463  | 0296  |
| 33    | 50    |
| hsa_c | hsa_c |
| irc_0 | irc_0 |
| 0463  | 0296  |
| 34    | 51    |
| hsa_c | hsa_c |
| irc_0 | irc_0 |
| 0463  | 0296  |
| 35    | 52    |
| hsa_c | hsa_c |
| irc_0 | irc_0 |
| 0463  | 0296  |
| 36    | 53    |



|       |       |
|-------|-------|
| hsa_c | hsa_c |
| irc_0 | irc_0 |
| 0463  | 0296  |
| 37    | 55    |
| hsa_c | hsa_c |
| irc_0 | irc_0 |
| 0463  | 0296  |
| 38    | 57    |
| hsa_c | hsa_c |
| irc_0 | irc_0 |
| 0463  | 0296  |
| 39    | 58    |
| hsa_c | hsa_c |
| irc_0 | irc_0 |
| 0463  | 0296  |
| 42    | 61    |
| hsa_c | hsa_c |
| irc_0 | irc_0 |
| 0463  | 0087  |
| 43    | 63    |
| hsa_c | hsa_c |
| irc_0 | irc_0 |
| 0463  | 0034  |
| 44    | 08    |
| hsa_c | hsa_c |
| irc_0 | irc_0 |
| 0463  | 0297  |
| 45    | 15    |
| hsa_c | hsa_c |
| irc_0 | irc_0 |
| 0464  | 0297  |
| 12    | 16    |
| hsa_c | hsa_c |
| irc_0 | irc_0 |
| 0464  | 0297  |
| 13    | 17    |
| hsa_c | hsa_c |
| irc_0 | irc_0 |
| 0464  | 0297  |
| 23    | 18    |
| hsa_c | hsa_c |
| irc_0 | irc_0 |
| 0464  | 0297  |
| 24    | 83    |
| hsa_c | hsa_c |
| irc_0 | irc_0 |
| 0464  | 0297  |
| 25    | 84    |
| hsa_c | hsa_c |
| irc_0 | irc_0 |
| 0464  | 0297  |
| 26    | 85    |
| hsa_c | hsa_c |
| irc_0 | irc_0 |
| 0464  | 0297  |

|       |       |
|-------|-------|
| 27    | 86    |
| hsa_c | hsa_c |
| irc_0 | irc_0 |
| 0464  | 0297  |
| 28    | 87    |
| hsa_c | hsa_c |
| irc_0 | irc_0 |
| 0464  | 0297  |
| 29    | 88    |
| hsa_c | hsa_c |
| irc_0 | irc_0 |
| 0464  | 0297  |
| 30    | 89    |
| hsa_c | hsa_c |
| irc_0 | irc_0 |
| 0175  | 0297  |
| 8     | 96    |
| hsa_c | hsa_c |
| irc_0 | irc_0 |
| 0175  | 0034  |
| 9     | 89    |
| hsa_c | hsa_c |
| irc_0 | irc_0 |
| 0079  | 0298  |
| 42    | 07    |
| hsa_c | hsa_c |
| irc_0 | irc_0 |
| 0464  | 0298  |
| 39    | 91    |
| hsa_c | hsa_c |
| irc_0 | irc_0 |
| 0464  | 0298  |
| 40    | 95    |
| hsa_c | hsa_c |
| irc_0 | irc_0 |
| 0464  | 0299  |
| 42    | 00    |
| hsa_c | hsa_c |
| irc_0 | irc_0 |
| 0464  | 0299  |
| 43    | 06    |
| hsa_c | hsa_c |
| irc_0 | irc_0 |
| 0467  | 0300  |
| 12    | 21    |
| hsa_c | hsa_c |
| irc_0 | irc_0 |
| 0467  | 0300  |
| 15    | 44    |
| hsa_c | hsa_c |
| irc_0 | irc_0 |
| 0467  | 0300  |
| 19    | 43    |
| hsa_c | hsa_c |

|       |       |
|-------|-------|
| irc_0 | irc_0 |
| 0467  | 0301  |
| 34    | 26    |
| hsa_c | hsa_c |
| irc_0 | irc_0 |
| 0467  | 0301  |
| 35    | 94    |
| hsa_c | hsa_c |
| irc_0 | irc_0 |
| 0467  | 0302  |
| 37    | 32    |
| hsa_c | hsa_c |
| irc_0 | irc_0 |
| 0467  | 0302  |
| 38    | 77    |
| hsa_c | hsa_c |
| irc_0 | irc_0 |
| 0467  | 0059  |
| 41    | 80    |
| hsa_c | hsa_c |
| irc_0 | irc_0 |
| 0467  | 0302  |
| 42    | 86    |
| hsa_c | hsa_c |
| irc_0 | irc_0 |
| 0467  | 0302  |
| 43    | 87    |
| hsa_c | hsa_c |
| irc_0 | irc_0 |
| 0467  | 0302  |
| 44    | 88    |
| hsa_c | hsa_c |
| irc_0 | irc_0 |
| 0468  | 0147  |
| 47    | 5     |
| hsa_c | hsa_c |
| irc_0 | irc_0 |
| 0468  | 0303  |
| 50    | 53    |
| hsa_c | hsa_c |
| irc_0 | irc_0 |
| 0468  | 0303  |
| 51    | 54    |
| hsa_c | hsa_c |
| irc_0 | irc_0 |
| 0468  | 0303  |
| 52    | 55    |
| hsa_c | hsa_c |
| irc_0 | irc_0 |
| 0064  | 0304  |
| 00    | 00    |
| hsa_c | hsa_c |
| irc_0 | irc_0 |
| 0469  | 0304  |
| 53    | 61    |

|       |       |
|-------|-------|
| hsa_c | hsa_c |
| irc_0 | irc_0 |
| 0469  | 0304  |
| 56    | 62    |
| hsa_c | hsa_c |
| irc_0 | irc_0 |
| 0469  | 0304  |
| 65    | 63    |
| hsa_c | hsa_c |
| irc_0 | irc_0 |
| 0469  | 0304  |
| 66    | 65    |
| hsa_c | hsa_c |
| irc_0 | irc_0 |
| 0469  | 0304  |
| 67    | 67    |
| hsa_c | hsa_c |
| irc_0 | irc_0 |
| 0470  | 0304  |
| 45    | 68    |
| hsa_c | hsa_c |
| irc_0 | irc_0 |
| 0470  | 0304  |
| 46    | 70    |
| hsa_c | hsa_c |
| irc_0 | irc_0 |
| 0470  | 0304  |
| 48    | 71    |
| hsa_c | hsa_c |
| irc_0 | irc_0 |
| 0470  | 0304  |
| 54    | 72    |
| hsa_c | hsa_c |
| irc_0 | irc_0 |
| 0470  | 0304  |
| 59    | 73    |
| hsa_c | hsa_c |
| irc_0 | irc_0 |
| 0470  | 0305  |
| 84    | 45    |
| hsa_c | hsa_c |
| irc_0 | irc_0 |
| 0471  | 0305  |
| 28    | 47    |
| hsa_c | hsa_c |
| irc_0 | irc_0 |
| 0471  | 0305  |
| 39    | 48    |
| hsa_c | hsa_c |
| irc_0 | irc_0 |
| 0471  | 0305  |
| 40    | 49    |
| hsa_c | hsa_c |
| irc_0 | irc_0 |
| 0471  | 0305  |

|       |       |
|-------|-------|
| 41    | 50    |
| hsa_c | hsa_c |
| irc_0 | irc_0 |
| 0471  | 0305  |
| 42    | 51    |
| hsa_c | hsa_c |
| irc_0 | irc_0 |
| 0034  | 0305  |
| 95    | 52    |
| hsa_c | hsa_c |
| irc_0 | irc_0 |
| 0472  | 0307  |
| 98    | 46    |
| hsa_c | hsa_c |
| irc_0 | irc_0 |
| 0473  | 0307  |
| 04    | 47    |
| hsa_c | hsa_c |
| irc_0 | irc_0 |
| 0473  | 0307  |
| 05    | 48    |
| hsa_c | hsa_c |
| irc_0 | irc_0 |
| 0473  | 0307  |
| 06    | 49    |
| hsa_c | hsa_c |
| irc_0 | irc_0 |
| 0473  | 0307  |
| 18    | 50    |
| hsa_c | hsa_c |
| irc_0 | irc_0 |
| 0473  | 0307  |
| 81    | 44    |
| hsa_c | hsa_c |
| irc_0 | irc_0 |
| 0475  | 0307  |
| 59    | 80    |
| hsa_c | hsa_c |
| irc_0 | irc_0 |
| 0475  | 0307  |
| 60    | 82    |
| hsa_c | hsa_c |
| irc_0 | irc_0 |
| 0475  | 0307  |
| 61    | 86    |
| hsa_c | hsa_c |
| irc_0 | irc_0 |
| 0475  | 0307  |
| 62    | 87    |
| hsa_c | hsa_c |
| irc_0 | irc_0 |
| 0475  | 0087  |
| 63    | 44    |
| hsa_c | hsa_c |

|       |       |
|-------|-------|
| irc_0 | irc_0 |
| 0475  | 0307  |
| 64    | 95    |
| hsa_c | hsa_c |
| irc_0 | irc_0 |
| 0475  | 0307  |
| 65    | 97    |
| hsa_c | hsa_c |
| irc_0 | irc_0 |
| 0475  | 0308  |
| 66    | 01    |
| hsa_c | hsa_c |
| irc_0 | irc_0 |
| 0475  | 0308  |
| 67    | 02    |
| hsa_c | hsa_c |
| irc_0 | irc_0 |
| 0475  | 0308  |
| 68    | 03    |
| hsa_c | hsa_c |
| irc_0 | irc_0 |
| 0475  | 0308  |
| 70    | 04    |
| hsa_c | hsa_c |
| irc_0 | irc_0 |
| 0069  | 0308  |
| 52    | 05    |
| hsa_c | hsa_c |
| irc_0 | irc_0 |
| 0477  | 0308  |
| 07    | 06    |
| hsa_c | hsa_c |
| irc_0 | irc_0 |
| 0477  | 0308  |
| 08    | 07    |
| hsa_c | hsa_c |
| irc_0 | irc_0 |
| 0477  | 0073  |
| 09    | 14    |
| hsa_c | hsa_c |
| irc_0 | irc_0 |
| 0477  | 0308  |
| 11    | 20    |
| hsa_c | hsa_c |
| irc_0 | irc_0 |
| 0034  | 0308  |
| 23    | 21    |
| hsa_c | hsa_c |
| irc_0 | irc_0 |
| 0043  | 0082  |
| 71    | 8     |
| hsa_c | hsa_c |
| irc_0 | irc_0 |
| 0070  | 0308  |
| 98    | 34    |

|       |       |
|-------|-------|
| hsa_c | hsa_c |
| irc_0 | irc_0 |
| 0478  | 0308  |
| 09    | 55    |
| hsa_c | hsa_c |
| irc_0 | irc_0 |
| 0478  | 0308  |
| 10    | 56    |
| hsa_c | hsa_c |
| irc_0 | irc_0 |
| 0478  | 0308  |
| 12    | 57    |
| hsa_c | hsa_c |
| irc_0 | irc_0 |
| 0478  | 0308  |
| 13    | 64    |
| hsa_c | hsa_c |
| irc_0 | irc_0 |
| 0478  | 0308  |
| 15    | 69    |
| hsa_c | hsa_c |
| irc_0 | irc_0 |
| 0478  | 0308  |
| 16    | 73    |
| hsa_c | hsa_c |
| irc_0 | irc_0 |
| 0478  | 0308  |
| 18    | 74    |
| hsa_c | hsa_c |
| irc_0 | irc_0 |
| 0478  | 0308  |
| 19    | 77    |
| hsa_c | hsa_c |
| irc_0 | irc_0 |
| 0478  | 0308  |
| 20    | 78    |
| hsa_c | hsa_c |
| irc_0 | irc_0 |
| 0478  | 0309  |
| 21    | 20    |
| hsa_c | hsa_c |
| irc_0 | irc_0 |
| 0478  | 0309  |
| 22    | 38    |
| hsa_c | hsa_c |
| irc_0 | irc_0 |
| 0478  | 0309  |
| 23    | 39    |
| hsa_c | hsa_c |
| irc_0 | irc_0 |
| 0478  | 0309  |
| 27    | 40    |
| hsa_c | hsa_c |
| irc_0 | irc_0 |
| 0478  | 0309  |

|       |       |
|-------|-------|
| 28    | 42    |
| hsa_c | hsa_c |
| irc_0 | irc_0 |
| 0478  | 0309  |
| 90    | 44    |
| hsa_c | hsa_c |
| irc_0 | irc_0 |
| 0478  | 0309  |
| 93    | 45    |
| hsa_c | hsa_c |
| irc_0 | irc_0 |
| 0478  | 0309  |
| 94    | 46    |
| hsa_c | hsa_c |
| irc_0 | irc_0 |
| 0478  | 0309  |
| 95    | 47    |
| hsa_c | hsa_c |
| irc_0 | irc_0 |
| 0478  | 0309  |
| 96    | 48    |
| hsa_c | hsa_c |
| irc_0 | irc_0 |
| 0479  | 0309  |
| 02    | 49    |
| hsa_c | hsa_c |
| irc_0 | irc_0 |
| 0479  | 0309  |
| 03    | 93    |
| hsa_c | hsa_c |
| irc_0 | irc_0 |
| 0479  | 0309  |
| 04    | 97    |
| hsa_c | hsa_c |
| irc_0 | irc_0 |
| 0479  | 0310  |
| 05    | 00    |
| hsa_c | hsa_c |
| irc_0 | irc_0 |
| 0479  | 0310  |
| 06    | 02    |
| hsa_c | hsa_c |
| irc_0 | irc_0 |
| 0028  | 0310  |
| 95    | 03    |
| hsa_c | hsa_c |
| irc_0 | irc_0 |
| 0034  | 0310  |
| 79    | 04    |
| hsa_c | hsa_c |
| irc_0 | irc_0 |
| 0051  | 0310  |
| 40    | 05    |
| hsa_c | hsa_c |



|       |       |
|-------|-------|
| irc_0 | irc_0 |
| 0077  | 0310  |
| 25    | 06    |
| hsa_c | hsa_c |
| irc_0 | irc_0 |
| 0482  | 0312  |
| 72    | 12    |
| hsa_c | hsa_c |
| irc_0 | irc_0 |
| 0482  | 0312  |
| 73    | 13    |
| hsa_c | hsa_c |
| irc_0 | irc_0 |
| 0482  | 0312  |
| 75    | 44    |
| hsa_c | hsa_c |
| irc_0 | irc_0 |
| 0482  | 0312  |
| 78    | 45    |
| hsa_c | hsa_c |
| irc_0 | irc_0 |
| 0482  | 0312  |
| 79    | 46    |
| hsa_c | hsa_c |
| irc_0 | irc_0 |
| 0483  | 0312  |
| 15    | 47    |
| hsa_c | hsa_c |
| irc_0 | irc_0 |
| 0483  | 0312  |
| 16    | 48    |
| hsa_c | hsa_c |
| irc_0 | irc_0 |
| 0483  | 0312  |
| 87    | 49    |
| hsa_c | hsa_c |
| irc_0 | irc_0 |
| 0483  | 0212  |
| 89    | 6     |
| hsa_c | hsa_c |
| irc_0 | irc_0 |
| 0483  | 0058  |
| 90    | 7     |
| hsa_c | hsa_c |
| irc_0 | irc_0 |
| 0483  | 0313  |
| 91    | 38    |
| hsa_c | hsa_c |
| irc_0 | irc_0 |
| 0485  | 0313  |
| 15    | 49    |
| hsa_c | hsa_c |
| irc_0 | irc_0 |
| 0485  | 0313  |
| 24    | 54    |

|       |       |
|-------|-------|
| hsa_c | hsa_c |
| irc_0 | irc_0 |
| 0485  | 0314  |
| 23    | 03    |
| hsa_c | hsa_c |
| irc_0 | irc_0 |
| 0485  | 0314  |
| 97    | 04    |
| hsa_c | hsa_c |
| irc_0 | irc_0 |
| 0485  | 0314  |
| 98    | 12    |
| hsa_c | hsa_c |
| irc_0 | irc_0 |
| 0485  | 0023  |
| 99    | 01    |
| hsa_c | hsa_c |
| irc_0 | irc_0 |
| 0486  | 0314  |
| 00    | 56    |
| hsa_c | hsa_c |
| irc_0 | irc_0 |
| 0063  | 0314  |
| 21    | 57    |
| hsa_c | hsa_c |
| irc_0 | irc_0 |
| 0486  | 0314  |
| 03    | 59    |
| hsa_c | hsa_c |
| irc_0 | irc_0 |
| 0486  | 0314  |
| 04    | 60    |
| hsa_c | hsa_c |
| irc_0 | irc_0 |
| 0486  | 0314  |
| 05    | 61    |
| hsa_c | hsa_c |
| irc_0 | irc_0 |
| 0486  | 0314  |
| 06    | 62    |
| hsa_c | hsa_c |
| irc_0 | irc_0 |
| 0486  | 0314  |
| 07    | 64    |
| hsa_c | hsa_c |
| irc_0 | irc_0 |
| 0486  | 0314  |
| 08    | 67    |
| hsa_c | hsa_c |
| irc_0 | irc_0 |
| 0194  | 0314  |
| 0     | 66    |
| hsa_c | hsa_c |
| irc_0 | irc_0 |
| 0487  | 0315  |

|       |       |
|-------|-------|
| 16    | 96    |
| hsa_c | hsa_c |
| irc_0 | irc_0 |
| 0487  | 0315  |
| 17    | 97    |
| hsa_c | hsa_c |
| irc_0 | irc_0 |
| 0487  | 0315  |
| 18    | 98    |
| hsa_c | hsa_c |
| irc_0 | irc_0 |
| 0487  | 0315  |
| 19    | 99    |
| hsa_c | hsa_c |
| irc_0 | irc_0 |
| 0487  | 0316  |
| 20    | 00    |
| hsa_c | hsa_c |
| irc_0 | irc_0 |
| 0487  | 0316  |
| 21    | 01    |
| hsa_c | hsa_c |
| irc_0 | irc_0 |
| 0487  | 0316  |
| 22    | 02    |
| hsa_c | hsa_c |
| irc_0 | irc_0 |
| 0487  | 0316  |
| 23    | 03    |
| hsa_c | hsa_c |
| irc_0 | irc_0 |
| 0487  | 0316  |
| 24    | 16    |
| hsa_c | hsa_c |
| irc_0 | irc_0 |
| 0487  | 0316  |
| 25    | 17    |
| hsa_c | hsa_c |
| irc_0 | irc_0 |
| 0487  | 0316  |
| 26    | 18    |
| hsa_c | hsa_c |
| irc_0 | irc_0 |
| 0489  | 0316  |
| 68    | 19    |
| hsa_c | hsa_c |
| irc_0 | irc_0 |
| 0489  | 0316  |
| 72    | 20    |
| hsa_c | hsa_c |
| irc_0 | irc_0 |
| 0490  | 0316  |
| 97    | 21    |
| hsa_c | hsa_c |

|       |       |
|-------|-------|
| irc_0 | irc_0 |
| 0491  | 0316  |
| 00    | 22    |
| hsa_c | hsa_c |
| irc_0 | irc_0 |
| 0491  | 0316  |
| 36    | 23    |
| hsa_c | hsa_c |
| irc_0 | irc_0 |
| 0051  | 0316  |
| 23    | 26    |
| hsa_c | hsa_c |
| irc_0 | irc_0 |
| 0493  | 0316  |
| 66    | 25    |
| hsa_c | hsa_c |
| irc_0 | irc_0 |
| 0493  | 0317  |
| 73    | 39    |
| hsa_c | hsa_c |
| irc_0 | irc_0 |
| 0494  | 0317  |
| 15    | 79    |
| hsa_c | hsa_c |
| irc_0 | irc_0 |
| 0494  | 0317  |
| 16    | 80    |
| hsa_c | hsa_c |
| irc_0 | irc_0 |
| 0494  | 0317  |
| 17    | 81    |
| hsa_c | hsa_c |
| irc_0 | irc_0 |
| 0494  | 0317  |
| 18    | 82    |
| hsa_c | hsa_c |
| irc_0 | irc_0 |
| 0494  | 0028  |
| 19    | 19    |
| hsa_c | hsa_c |
| irc_0 | irc_0 |
| 0494  | 0036  |
| 76    | 16    |
| hsa_c | hsa_c |
| irc_0 | irc_0 |
| 0494  | 0036  |
| 72    | 89    |
| hsa_c | hsa_c |
| irc_0 | irc_0 |
| 0494  | 0052  |
| 88    | 15    |
| hsa_c | hsa_c |
| irc_0 | irc_0 |
| 0494  | 0060  |
| 89    | 66    |

|       |       |
|-------|-------|
| hsa_c | hsa_c |
| irc_0 | irc_0 |
| 0494  | 0080  |
| 90    | 88    |
| hsa_c | hsa_c |
| irc_0 | irc_0 |
| 0494  | 0088  |
| 91    | 45    |
| hsa_c | hsa_c |
| irc_0 | irc_0 |
| 0497  | 0090  |
| 62    | 80    |
| hsa_c | hsa_c |
| irc_0 | irc_0 |
| 0497  | 0317  |
| 63    | 72    |
| hsa_c | hsa_c |
| irc_0 | irc_0 |
| 0497  | 0020  |
| 64    | 98    |
| hsa_c | hsa_c |
| irc_0 | irc_0 |
| 0498  | 0026  |
| 37    | 67    |
| hsa_c | hsa_c |
| irc_0 | irc_0 |
| 0498  | 0040  |
| 58    | 55    |
| hsa_c | hsa_c |
| irc_0 | irc_0 |
| 0498  | 0072  |
| 97    | 20    |
| hsa_c | hsa_c |
| irc_0 | irc_0 |
| 0499  | 0079  |
| 37    | 99    |
| hsa_c | hsa_c |
| irc_0 | irc_0 |
| 0499  | 0085  |
| 84    | 88    |
| hsa_c | hsa_c |
| irc_0 | irc_0 |
| 0499  | 0088  |
| 85    | 62    |
| hsa_c | hsa_c |
| irc_0 | irc_0 |
| 0499  | 0089  |
| 86    | 09    |
| hsa_c | hsa_c |
| irc_0 | irc_0 |
| 0499  | 0069  |
| 87    | 40    |
| hsa_c | hsa_c |
| irc_0 | irc_0 |
| 0499  | 0318  |

|       |       |
|-------|-------|
| 88    | 18    |
| hsa_c | hsa_c |
| irc_0 | irc_0 |
| 0502  | 0318  |
| 32    | 19    |
| hsa_c | hsa_c |
| irc_0 | irc_0 |
| 0502  | 0318  |
| 35    | 20    |
| hsa_c | hsa_c |
| irc_0 | irc_0 |
| 0502  | 0318  |
| 37    | 21    |
| hsa_c | hsa_c |
| irc_0 | irc_0 |
| 0502  | 0318  |
| 38    | 22    |
| hsa_c | hsa_c |
| irc_0 | irc_0 |
| 0139  | 0318  |
| 7     | 23    |
| hsa_c | hsa_c |
| irc_0 | irc_0 |
| 0083  | 0318  |
| 47    | 24    |
| hsa_c | hsa_c |
| irc_0 | irc_0 |
| 0505  | 0318  |
| 64    | 37    |
| hsa_c | hsa_c |
| irc_0 | irc_0 |
| 0505  | 0318  |
| 67    | 54    |
| hsa_c | hsa_c |
| irc_0 | irc_0 |
| 0505  | 0318  |
| 82    | 55    |
| hsa_c | hsa_c |
| irc_0 | irc_0 |
| 0507  | 0318  |
| 66    | 56    |
| hsa_c | hsa_c |
| irc_0 | irc_0 |
| 0507  | 0319  |
| 69    | 41    |
| hsa_c | hsa_c |
| irc_0 | irc_0 |
| 0050  | 0022  |
| 81    | 02    |
| hsa_c | hsa_c |
| irc_0 | irc_0 |
| 0507  | 0320  |
| 91    | 20    |
| hsa_c | hsa_c |

|       |       |
|-------|-------|
| irc_0 | irc_0 |
| 0507  | 0320  |
| 92    | 54    |
| hsa_c | hsa_c |
| irc_0 | irc_0 |
| 0507  | 0320  |
| 93    | 56    |
| hsa_c | hsa_c |
| irc_0 | irc_0 |
| 0507  | 0320  |
| 94    | 85    |
| hsa_c | hsa_c |
| irc_0 | irc_0 |
| 0507  | 0321  |
| 95    | 60    |
| hsa_c | hsa_c |
| irc_0 | irc_0 |
| 0507  | 0321  |
| 98    | 62    |
| hsa_c | hsa_c |
| irc_0 | irc_0 |
| 0507  | 0322  |
| 99    | 16    |
| hsa_c | hsa_c |
| irc_0 | irc_0 |
| 0508  | 0322  |
| 01    | 17    |
| hsa_c | hsa_c |
| irc_0 | irc_0 |
| 0508  | 0322  |
| 02    | 34    |
| hsa_c | hsa_c |
| irc_0 | irc_0 |
| 0508  | 0084  |
| 03    | 68    |
| hsa_c | hsa_c |
| irc_0 | irc_0 |
| 0508  | 0322  |
| 04    | 51    |
| hsa_c | hsa_c |
| irc_0 | irc_0 |
| 0508  | 0322  |
| 05    | 50    |
| hsa_c | hsa_c |
| irc_0 | irc_0 |
| 0508  | 0322  |
| 06    | 84    |
| hsa_c | hsa_c |
| irc_0 | irc_0 |
| 0509  | 0125  |
| 58    | 0     |
| hsa_c | hsa_c |
| irc_0 | irc_0 |
| 0509  | 0323  |
| 76    | 70    |

|       |       |
|-------|-------|
| hsa_c | hsa_c |
| irc_0 | irc_0 |
| 0509  | 0040  |
| 77    | 08    |
| hsa_c | hsa_c |
| irc_0 | irc_0 |
| 0509  | 0323  |
| 78    | 87    |
| hsa_c | hsa_c |
| irc_0 | irc_0 |
| 0509  | 0323  |
| 79    | 91    |
| hsa_c | hsa_c |
| irc_0 | irc_0 |
| 0509  | 0323  |
| 91    | 92    |
| hsa_c | hsa_c |
| irc_0 | irc_0 |
| 0509  | 0323  |
| 93    | 98    |
| hsa_c | hsa_c |
| irc_0 | irc_0 |
| 0510  | 0323  |
| 55    | 99    |
| hsa_c | hsa_c |
| irc_0 | irc_0 |
| 0511  | 0324  |
| 59    | 00    |
| hsa_c | hsa_c |
| irc_0 | irc_0 |
| 0511  | 0324  |
| 61    | 01    |
| hsa_c | hsa_c |
| irc_0 | irc_0 |
| 0511  | 0324  |
| 67    | 02    |
| hsa_c | hsa_c |
| irc_0 | irc_0 |
| 0511  | 0324  |
| 70    | 03    |
| hsa_c | hsa_c |
| irc_0 | irc_0 |
| 0511  | 0059  |
| 74    | 4     |
| hsa_c | hsa_c |
| irc_0 | irc_0 |
| 0511  | 0325  |
| 75    | 11    |
| hsa_c | hsa_c |
| irc_0 | irc_0 |
| 0511  | 0325  |
| 78    | 21    |
| hsa_c | hsa_c |
| irc_0 | irc_0 |
| 0511  | 0325  |



|       |       |
|-------|-------|
| 80    | 28    |
| hsa_c | hsa_c |
| irc_0 | irc_0 |
| 0511  | 0062  |
| 81    | 18    |
| hsa_c | hsa_c |
| irc_0 | irc_0 |
| 0511  | 0325  |
| 87    | 37    |
| hsa_c | hsa_c |
| irc_0 | irc_0 |
| 0511  | 0325  |
| 93    | 39    |
| hsa_c | hsa_c |
| irc_0 | irc_0 |
| 0511  | 0325  |
| 94    | 40    |
| hsa_c | hsa_c |
| irc_0 | irc_0 |
| 0511  | 0325  |
| 97    | 48    |
| hsa_c | hsa_c |
| irc_0 | irc_0 |
| 0511  | 0325  |
| 98    | 50    |
| hsa_c | hsa_c |
| irc_0 | irc_0 |
| 0512  | 0326  |
| 01    | 23    |
| hsa_c | hsa_c |
| irc_0 | irc_0 |
| 0512  | 0326  |
| 03    | 97    |
| hsa_c | hsa_c |
| irc_0 | irc_0 |
| 0512  | 0326  |
| 04    | 98    |
| hsa_c | hsa_c |
| irc_0 | irc_0 |
| 0512  | 0327  |
| 05    | 01    |
| hsa_c | hsa_c |
| irc_0 | irc_0 |
| 0513  | 0327  |
| 27    | 02    |
| hsa_c | hsa_c |
| irc_0 | irc_0 |
| 0514  | 0327  |
| 16    | 05    |
| hsa_c | hsa_c |
| irc_0 | irc_0 |
| 0515  | 0327  |
| 04    | 06    |
| hsa_c | hsa_c |

|       |       |
|-------|-------|
| irc_0 | irc_0 |
| 0515  | 0327  |
| 09    | 07    |
| hsa_c | hsa_c |
| irc_0 | irc_0 |
| 0515  | 0327  |
| 10    | 13    |
| hsa_c | hsa_c |
| irc_0 | irc_0 |
| 0516  | 0327  |
| 46    | 14    |
| hsa_c | hsa_c |
| irc_0 | irc_0 |
| 0516  | 0327  |
| 87    | 15    |
| hsa_c | hsa_c |
| irc_0 | irc_0 |
| 0521  | 0327  |
| 04    | 57    |
| hsa_c | hsa_c |
| irc_0 | irc_0 |
| 0522  | 0328  |
| 58    | 05    |
| hsa_c | hsa_c |
| irc_0 | irc_0 |
| 0522  | 0024  |
| 59    | 99    |
| hsa_c | hsa_c |
| irc_0 | irc_0 |
| 0163  | 0328  |
| 4     | 20    |
| hsa_c | hsa_c |
| irc_0 | irc_0 |
| 0523  | 0328  |
| 00    | 23    |
| hsa_c | hsa_c |
| irc_0 | irc_0 |
| 0523  | 0328  |
| 07    | 36    |
| hsa_c | hsa_c |
| irc_0 | irc_0 |
| 0523  | 0328  |
| 06    | 37    |
| hsa_c | hsa_c |
| irc_0 | irc_0 |
| 0523  | 0328  |
| 05    | 38    |
| hsa_c | hsa_c |
| irc_0 | irc_0 |
| 0163  | 0328  |
| 5     | 39    |
| hsa_c | hsa_c |
| irc_0 | irc_0 |
| 0523  | 0328  |
| 09    | 44    |

|       |       |
|-------|-------|
| hsa_c | hsa_c |
| irc_0 | irc_0 |
| 0523  | 0328  |
| 32    | 45    |
| hsa_c | hsa_c |
| irc_0 | irc_0 |
| 0523  | 0025  |
| 33    | 59    |
| hsa_c | hsa_c |
| irc_0 | irc_0 |
| 0592  | 0328  |
| 76    | 92    |
| hsa_c | hsa_c |
| irc_0 | irc_0 |
| 0592  | 0328  |
| 77    | 93    |
| hsa_c | hsa_c |
| irc_0 | irc_0 |
| 0592  | 0330  |
| 85    | 03    |
| hsa_c | hsa_c |
| irc_0 | irc_0 |
| 0592  | 0330  |
| 87    | 04    |
| hsa_c | hsa_c |
| irc_0 | irc_0 |
| 0592  | 0330  |
| 94    | 77    |
| hsa_c | hsa_c |
| irc_0 | irc_0 |
| 0592  | 0330  |
| 95    | 78    |
| hsa_c | hsa_c |
| irc_0 | irc_0 |
| 0592  | 0330  |
| 96    | 79    |
| hsa_c | hsa_c |
| irc_0 | irc_0 |
| 0592  | 0330  |
| 97    | 80    |
| hsa_c | hsa_c |
| irc_0 | irc_0 |
| 0592  | 0330  |
| 98    | 81    |
| hsa_c | hsa_c |
| irc_0 | irc_0 |
| 0592  | 0330  |
| 99    | 82    |
| hsa_c | hsa_c |
| irc_0 | irc_0 |
| 0593  | 0023  |
| 00    | 98    |
| hsa_c | hsa_c |
| irc_0 | irc_0 |
| 0593  | 0079  |

|       |       |
|-------|-------|
| 84    | 79    |
| hsa_c | hsa_c |
| irc_0 | irc_0 |
| 0593  | 0332  |
| 85    | 09    |
| hsa_c | hsa_c |
| irc_0 | irc_0 |
| 0593  | 0332  |
| 86    | 11    |
| hsa_c | hsa_c |
| irc_0 | irc_0 |
| 0593  | 0332  |
| 95    | 12    |
| hsa_c | hsa_c |
| irc_0 | irc_0 |
| 0594  | 0332  |
| 94    | 18    |
| hsa_c | hsa_c |
| irc_0 | irc_0 |
| 0595  | 0332  |
| 34    | 21    |
| hsa_c | hsa_c |
| irc_0 | irc_0 |
| 0595  | 0332  |
| 36    | 25    |
| hsa_c | hsa_c |
| irc_0 | irc_0 |
| 0595  | 0332  |
| 37    | 27    |
| hsa_c | hsa_c |
| irc_0 | irc_0 |
| 0595  | 0332  |
| 38    | 30    |
| hsa_c | hsa_c |
| irc_0 | irc_0 |
| 0595  | 0335  |
| 39    | 37    |
| hsa_c | hsa_c |
| irc_0 | irc_0 |
| 0595  | 0335  |
| 40    | 38    |
| hsa_c | hsa_c |
| irc_0 | irc_0 |
| 0595  | 0336  |
| 41    | 06    |
| hsa_c | hsa_c |
| irc_0 | irc_0 |
| 0596  | 0336  |
| 09    | 07    |
| hsa_c | hsa_c |
| irc_0 | irc_0 |
| 0596  | 0340  |
| 33    | 89    |
| hsa_c | hsa_c |

|       |       |
|-------|-------|
| irc_0 | irc_0 |
| 0596  | 0340  |
| 89    | 92    |
| hsa_c | hsa_c |
| irc_0 | irc_0 |
| 0597  | 0343  |
| 78    | 27    |
| hsa_c | hsa_c |
| irc_0 | irc_0 |
| 0070  | 0343  |
| 29    | 40    |
| hsa_c | hsa_c |
| irc_0 | irc_0 |
| 0215  | 0343  |
| 8     | 39    |
| hsa_c | hsa_c |
| irc_0 | irc_0 |
| 0597  | 0343  |
| 91    | 55    |
| hsa_c | hsa_c |
| irc_0 | irc_0 |
| 0597  | 0343  |
| 90    | 56    |
| hsa_c | hsa_c |
| irc_0 | irc_0 |
| 0600  | 0343  |
| 43    | 96    |
| hsa_c | hsa_c |
| irc_0 | irc_0 |
| 0600  | 0346  |
| 56    | 37    |
| hsa_c | hsa_c |
| irc_0 | irc_0 |
| 0600  | 0347  |
| 58    | 05    |
| hsa_c | hsa_c |
| irc_0 | irc_0 |
| 0601  | 0347  |
| 87    | 06    |
| hsa_c | hsa_c |
| irc_0 | irc_0 |
| 0601  | 0347  |
| 95    | 07    |
| hsa_c | hsa_c |
| irc_0 | irc_0 |
| 0601  | 0347  |
| 96    | 08    |
| hsa_c | hsa_c |
| irc_0 | irc_0 |
| 0601  | 0347  |
| 97    | 09    |
| hsa_c | hsa_c |
| irc_0 | irc_0 |
| 0602  | 0347  |
| 98    | 10    |

|       |       |
|-------|-------|
| hsa_c | hsa_c |
| irc_0 | irc_0 |
| 0603  | 0347  |
| 01    | 11    |
| hsa_c | hsa_c |
| irc_0 | irc_0 |
| 0603  | 0347  |
| 03    | 26    |
| hsa_c | hsa_c |
| irc_0 | irc_0 |
| 0603  | 0347  |
| 24    | 28    |
| hsa_c | hsa_c |
| irc_0 | irc_0 |
| 0603  | 0347  |
| 25    | 32    |
| hsa_c | hsa_c |
| irc_0 | irc_0 |
| 0603  | 0347  |
| 26    | 33    |
| hsa_c | hsa_c |
| irc_0 | irc_0 |
| 0603  | 0347  |
| 91    | 36    |
| hsa_c | hsa_c |
| irc_0 | irc_0 |
| 0603  | 0347  |
| 93    | 37    |
| hsa_c | hsa_c |
| irc_0 | irc_0 |
| 0604  | 0347  |
| 81    | 38    |
| hsa_c | hsa_c |
| irc_0 | irc_0 |
| 0025  | 0347  |
| 17    | 39    |
| hsa_c | hsa_c |
| irc_0 | irc_0 |
| 0605  | 0347  |
| 24    | 40    |
| hsa_c | hsa_c |
| irc_0 | irc_0 |
| 0605  | 0347  |
| 25    | 41    |
| hsa_c | hsa_c |
| irc_0 | irc_0 |
| 0605  | 0347  |
| 26    | 42    |
| hsa_c | hsa_c |
| irc_0 | irc_0 |
| 0605  | 0347  |
| 29    | 43    |

|       |       |
|-------|-------|
| hsa_c | hsa_c |
| irc_0 | irc_0 |
| 0605  | 0175  |
| 30    | 6     |
| hsa_c | hsa_c |
| irc_0 | irc_0 |
| 0605  | 0349  |
| 62    | 96    |
| hsa_c | hsa_c |
| irc_0 | irc_0 |
| 0606  | 0349  |
| 66    | 97    |
| hsa_c | hsa_c |
| irc_0 | irc_0 |
| 0606  | 0349  |
| 67    | 98    |
| hsa_c | hsa_c |
| irc_0 | irc_0 |
| 0606  | 0351  |
| 68    | 32    |
| hsa_c | hsa_c |
| irc_0 | irc_0 |
| 0606  | 0074  |
| 69    | 87    |
| hsa_c | hsa_c |
| irc_0 | irc_0 |
| 0606  | 0352  |
| 70    | 11    |
| hsa_c | hsa_c |
| irc_0 | irc_0 |
| 0606  | 0352  |
| 74    | 12    |
| hsa_c | hsa_c |
| irc_0 | irc_0 |
| 0606  | 0352  |
| 75    | 23    |
| hsa_c | hsa_c |
| irc_0 | irc_0 |
| 0606  | 0352  |
| 76    | 24    |
| hsa_c | hsa_c |
| irc_0 | irc_0 |
| 0606  | 0352  |
| 77    | 25    |
| hsa_c | hsa_c |
| irc_0 | irc_0 |
| 0606  | 0352  |
| 78    | 29    |
| hsa_c | hsa_c |
| irc_0 | irc_0 |
| 0606  | 0352  |
| 79    | 33    |
| hsa_c | hsa_c |
| irc_0 | irc_0 |
| 0606  | 0352  |

|       |       |
|-------|-------|
| 80    | 34    |
| hsa_c | hsa_c |
| irc_0 | irc_0 |
| 0606  | 0352  |
| 81    | 78    |
| hsa_c | hsa_c |
| irc_0 | irc_0 |
| 0606  | 0353  |
| 82    | 01    |
| hsa_c | hsa_c |
| irc_0 | irc_0 |
| 0606  | 0353  |
| 83    | 04    |
| hsa_c | hsa_c |
| irc_0 | irc_0 |
| 0606  | 0353  |
| 85    | 07    |
| hsa_c | hsa_c |
| irc_0 | irc_0 |
| 0606  | 0353  |
| 86    | 08    |
| hsa_c | hsa_c |
| irc_0 | irc_0 |
| 0606  | 0353  |
| 87    | 10    |
| hsa_c | hsa_c |
| irc_0 | irc_0 |
| 0606  | 0353  |
| 88    | 41    |
| hsa_c | hsa_c |
| irc_0 | irc_0 |
| 0606  | 0353  |
| 89    | 42    |
| hsa_c | hsa_c |
| irc_0 | irc_0 |
| 0606  | 0353  |
| 90    | 43    |
| hsa_c | hsa_c |
| irc_0 | irc_0 |
| 0606  | 0353  |
| 91    | 44    |
| hsa_c | hsa_c |
| irc_0 | irc_0 |
| 0606  | 0353  |
| 92    | 45    |
| hsa_c | hsa_c |
| irc_0 | irc_0 |
| 0606  | 0353  |
| 93    | 89    |
| hsa_c | hsa_c |
| irc_0 | irc_0 |
| 0606  | 0353  |
| 95    | 93    |
| hsa_c | hsa_c |



|       |       |
|-------|-------|
| irc_0 | irc_0 |
| 0606  | 0353  |
| 96    | 94    |
| hsa_c | hsa_c |
| irc_0 | irc_0 |
| 0606  | 0353  |
| 97    | 95    |
| hsa_c | hsa_c |
| irc_0 | irc_0 |
| 0606  | 0353  |
| 98    | 98    |
| hsa_c | hsa_c |
| irc_0 | irc_0 |
| 0606  | 0353  |
| 99    | 99    |
| hsa_c | hsa_c |
| irc_0 | irc_0 |
| 0607  | 0354  |
| 00    | 00    |
| hsa_c | hsa_c |
| irc_0 | irc_0 |
| 0607  | 0354  |
| 01    | 01    |
| hsa_c | hsa_c |
| irc_0 | irc_0 |
| 0607  | 0354  |
| 02    | 02    |
| hsa_c | hsa_c |
| irc_0 | irc_0 |
| 0607  | 0354  |
| 03    | 03    |
| hsa_c | hsa_c |
| irc_0 | irc_0 |
| 0607  | 0354  |
| 06    | 04    |
| hsa_c | hsa_c |
| irc_0 | irc_0 |
| 0607  | 0354  |
| 07    | 72    |
| hsa_c | hsa_c |
| irc_0 | irc_0 |
| 0607  | 0354  |
| 04    | 73    |
| hsa_c | hsa_c |
| irc_0 | irc_0 |
| 0607  | 0354  |
| 88    | 74    |
| hsa_c | hsa_c |
| irc_0 | irc_0 |
| 0607  | 0354  |
| 89    | 75    |
| hsa_c | hsa_c |
| irc_0 | irc_0 |
| 0607  | 0354  |
| 90    | 78    |

|       |       |
|-------|-------|
| hsa_c | hsa_c |
| irc_0 | irc_0 |
| 0607  | 0354  |
| 91    | 77    |
| hsa_c | hsa_c |
| irc_0 | irc_0 |
| 0607  | 0354  |
| 92    | 96    |
| hsa_c | hsa_c |
| irc_0 | irc_0 |
| 0607  | 0354  |
| 93    | 97    |
| hsa_c | hsa_c |
| irc_0 | irc_0 |
| 0607  | 0354  |
| 94    | 98    |
| hsa_c | hsa_c |
| irc_0 | irc_0 |
| 0607  | 0354  |
| 95    | 99    |
| hsa_c | hsa_c |
| irc_0 | irc_0 |
| 0607  | 0355  |
| 96    | 00    |
| hsa_c | hsa_c |
| irc_0 | irc_0 |
| 0608  | 0355  |
| 35    | 01    |
| hsa_c | hsa_c |
| irc_0 | irc_0 |
| 0608  | 0355  |
| 36    | 06    |
| hsa_c | hsa_c |
| irc_0 | irc_0 |
| 0609  | 0355  |
| 45    | 07    |
| hsa_c | hsa_c |
| irc_0 | irc_0 |
| 0609  | 0355  |
| 46    | 03    |
| hsa_c | hsa_c |
| irc_0 | irc_0 |
| 0609  | 0355  |
| 47    | 04    |
| hsa_c | hsa_c |
| irc_0 | irc_0 |
| 0609  | 0024  |
| 48    | 95    |
| hsa_c | hsa_c |
| irc_0 | irc_0 |
| 0609  | 0356  |
| 80    | 59    |
| hsa_c | hsa_c |
| irc_0 | irc_0 |
| 0610  | 0356  |

|       |       |
|-------|-------|
| 07    | 60    |
| hsa_c | hsa_c |
| irc_0 | irc_0 |
| 0611  | 0358  |
| 20    | 86    |
| hsa_c | hsa_c |
| irc_0 | irc_0 |
| 0611  | 0060  |
| 18    | 1     |
| hsa_c | hsa_c |
| irc_0 | irc_0 |
| 0611  | 0358  |
| 62    | 87    |
| hsa_c | hsa_c |
| irc_0 | irc_0 |
| 0611  | 0358  |
| 61    | 88    |
| hsa_c | hsa_c |
| irc_0 | irc_0 |
| 0611  | 0359  |
| 85    | 24    |
| hsa_c | hsa_c |
| irc_0 | irc_0 |
| 0611  | 0359  |
| 86    | 25    |
| hsa_c | hsa_c |
| irc_0 | irc_0 |
| 0612  | 0359  |
| 03    | 26    |
| hsa_c | hsa_c |
| irc_0 | irc_0 |
| 0612  | 0359  |
| 04    | 27    |
| hsa_c | hsa_c |
| irc_0 | irc_0 |
| 0612  | 0359  |
| 06    | 30    |
| hsa_c | hsa_c |
| irc_0 | irc_0 |
| 0612  | 0359  |
| 07    | 31    |
| hsa_c | hsa_c |
| irc_0 | irc_0 |
| 0612  | 0360  |
| 08    | 07    |
| hsa_c | hsa_c |
| irc_0 | irc_0 |
| 0612  | 0360  |
| 09    | 08    |
| hsa_c | hsa_c |
| irc_0 | irc_0 |
| 0612  | 0362  |
| 10    | 07    |
| hsa_c | hsa_c |

|       |       |
|-------|-------|
| irc_0 | irc_0 |
| 0612  | 0362  |
| 01    | 08    |
| hsa_c | hsa_c |
| irc_0 | irc_0 |
| 0612  | 0362  |
| 02    | 25    |
| hsa_c | hsa_c |
| irc_0 | irc_0 |
| 0038  | 0362  |
| 90    | 26    |
| hsa_c | hsa_c |
| irc_0 | irc_0 |
| 0613  | 0362  |
| 06    | 27    |
| hsa_c | hsa_c |
| irc_0 | irc_0 |
| 0613  | 0362  |
| 64    | 33    |
| hsa_c | hsa_c |
| irc_0 | irc_0 |
| 0613  | 0362  |
| 65    | 35    |
| hsa_c | hsa_c |
| irc_0 | irc_0 |
| 0061  | 0362  |
| 58    | 36    |
| hsa_c | hsa_c |
| irc_0 | irc_0 |
| 0072  | 0362  |
| 07    | 61    |
| hsa_c | hsa_c |
| irc_0 | irc_0 |
| 0614  | 0362  |
| 23    | 69    |
| hsa_c | hsa_c |
| irc_0 | irc_0 |
| 0614  | 0362  |
| 27    | 80    |
| hsa_c | hsa_c |
| irc_0 | irc_0 |
| 0614  | 0363  |
| 30    | 05    |
| hsa_c | hsa_c |
| irc_0 | irc_0 |
| 0614  | 0363  |
| 31    | 06    |
| hsa_c | hsa_c |
| irc_0 | irc_0 |
| 0615  | 0363  |
| 60    | 12    |
| hsa_c | hsa_c |
| irc_0 | irc_0 |
| 0615  | 0363  |
| 63    | 23    |

|       |       |
|-------|-------|
| hsa_c | hsa_c |
| irc_0 | irc_0 |
| 0615  | 0363  |
| 66    | 38    |
| hsa_c | hsa_c |
| irc_0 | irc_0 |
| 0615  | 0363  |
| 67    | 39    |
| hsa_c | hsa_c |
| irc_0 | irc_0 |
| 0615  | 0363  |
| 81    | 40    |
| hsa_c | hsa_c |
| irc_0 | irc_0 |
| 0050  | 0363  |
| 76    | 41    |
| hsa_c | hsa_c |
| irc_0 | irc_0 |
| 0615  | 0364  |
| 85    | 33    |
| hsa_c | hsa_c |
| irc_0 | irc_0 |
| 0615  | 0364  |
| 83    | 34    |
| hsa_c | hsa_c |
| irc_0 | irc_0 |
| 0615  | 0364  |
| 84    | 35    |
| hsa_c | hsa_c |
| irc_0 | irc_0 |
| 0027  | 0364  |
| 63    | 36    |
| hsa_c | hsa_c |
| irc_0 | irc_0 |
| 0616  | 0025  |
| 44    | 68    |
| hsa_c | hsa_c |
| irc_0 | irc_0 |
| 0616  | 0365  |
| 45    | 67    |
| hsa_c | hsa_c |
| irc_0 | irc_0 |
| 0616  | 0365  |
| 46    | 75    |
| hsa_c | hsa_c |
| irc_0 | irc_0 |
| 0616  | 0365  |
| 47    | 76    |
| hsa_c | hsa_c |
| irc_0 | irc_0 |
| 0616  | 0366  |
| 48    | 70    |
| hsa_c | hsa_c |
| irc_0 | irc_0 |
| 0616  | 0366  |

|       |       |
|-------|-------|
| 49    | 71    |
| hsa_c | hsa_c |
| irc_0 | irc_0 |
| 0616  | 0366  |
| 50    | 72    |
| hsa_c | hsa_c |
| irc_0 | irc_0 |
| 0616  | 0078  |
| 52    | 37    |
| hsa_c | hsa_c |
| irc_0 | irc_0 |
| 0616  | 0366  |
| 53    | 94    |
| hsa_c | hsa_c |
| irc_0 | irc_0 |
| 0616  | 0367  |
| 54    | 39    |
| hsa_c | hsa_c |
| irc_0 | irc_0 |
| 0616  | 0367  |
| 55    | 40    |
| hsa_c | hsa_c |
| irc_0 | irc_0 |
| 0616  | 0367  |
| 59    | 41    |
| hsa_c | hsa_c |
| irc_0 | irc_0 |
| 0616  | 0367  |
| 75    | 82    |
| hsa_c | hsa_c |
| irc_0 | irc_0 |
| 0616  | 0367  |
| 80    | 83    |
| hsa_c | hsa_c |
| irc_0 | irc_0 |
| 0616  | 0367  |
| 84    | 84    |
| hsa_c | hsa_c |
| irc_0 | irc_0 |
| 0617  | 0368  |
| 59    | 51    |
| hsa_c | hsa_c |
| irc_0 | irc_0 |
| 0617  | 0368  |
| 60    | 55    |
| hsa_c | hsa_c |
| irc_0 | irc_0 |
| 0618  | 0368  |
| 21    | 56    |
| hsa_c | hsa_c |
| irc_0 | irc_0 |
| 0619  | 0368  |
| 78    | 58    |
| hsa_c | hsa_c |

|       |       |
|-------|-------|
| irc_0 | irc_0 |
| 0619  | 0368  |
| 79    | 59    |
| hsa_c | hsa_c |
| irc_0 | irc_0 |
| 0619  | 0368  |
| 80    | 63    |
| hsa_c | hsa_c |
| irc_0 | irc_0 |
| 0619  | 0368  |
| 81    | 65    |
| hsa_c | hsa_c |
| irc_0 | irc_0 |
| 0619  | 0368  |
| 82    | 66    |
| hsa_c | hsa_c |
| irc_0 | irc_0 |
| 0619  | 0369  |
| 83    | 48    |
| hsa_c | hsa_c |
| irc_0 | irc_0 |
| 0620  | 0369  |
| 93    | 55    |
| hsa_c | hsa_c |
| irc_0 | irc_0 |
| 0620  | 0050  |
| 99    | 35    |
| hsa_c | hsa_c |
| irc_0 | irc_0 |
| 0621  | 0370  |
| 27    | 19    |
| hsa_c | hsa_c |
| irc_0 | irc_0 |
| 0037  | 0370  |
| 81    | 20    |
| hsa_c | hsa_c |
| irc_0 | irc_0 |
| 0622  | 0370  |
| 89    | 21    |
| hsa_c | hsa_c |
| irc_0 | irc_0 |
| 0623  | 0370  |
| 86    | 22    |
| hsa_c | hsa_c |
| irc_0 | irc_0 |
| 0623  | 0370  |
| 88    | 23    |
| hsa_c | hsa_c |
| irc_0 | irc_0 |
| 0623  | 0370  |
| 90    | 24    |
| hsa_c | hsa_c |
| irc_0 | irc_0 |
| 0623  | 0370  |
| 91    | 25    |

|       |       |
|-------|-------|
| hsa_c | hsa_c |
| irc_0 | irc_0 |
| 0623  | 0370  |
| 92    | 48    |
| hsa_c | hsa_c |
| irc_0 | irc_0 |
| 0623  | 0370  |
| 93    | 49    |
| hsa_c | hsa_c |
| irc_0 | irc_0 |
| 0623  | 0370  |
| 35    | 50    |
| hsa_c | hsa_c |
| irc_0 | irc_0 |
| 0623  | 0370  |
| 51    | 51    |
| hsa_c | hsa_c |
| irc_0 | irc_0 |
| 0623  | 0371  |
| 54    | 74    |
| hsa_c | hsa_c |
| irc_0 | irc_0 |
| 0623  | 0148  |
| 57    | 2     |
| hsa_c | hsa_c |
| irc_0 | irc_0 |
| 0623  | 0371  |
| 60    | 76    |
| hsa_c | hsa_c |
| irc_0 | irc_0 |
| 0623  | 0371  |
| 70    | 79    |
| hsa_c | hsa_c |
| irc_0 | irc_0 |
| 0623  | 0371  |
| 71    | 80    |
| hsa_c | hsa_c |
| irc_0 | irc_0 |
| 0623  | 0372  |
| 77    | 09    |
| hsa_c | hsa_c |
| irc_0 | irc_0 |
| 0623  | 0372  |
| 81    | 77    |
| hsa_c | hsa_c |
| irc_0 | irc_0 |
| 0623  | 0372  |
| 83    | 80    |
| hsa_c | hsa_c |
| irc_0 | irc_0 |
| 0623  | 0372  |
| 99    | 81    |
| hsa_c | hsa_c |
| irc_0 | irc_0 |
| 0624  | 0372  |



|       |       |
|-------|-------|
| 10    | 83    |
| hsa_c | hsa_c |
| irc_0 | irc_0 |
| 0624  | 0372  |
| 42    | 94    |
| hsa_c | hsa_c |
| irc_0 | irc_0 |
| 0624  | 0372  |
| 43    | 96    |
| hsa_c | hsa_c |
| irc_0 | irc_0 |
| 0624  | 0372  |
| 44    | 97    |
| hsa_c | hsa_c |
| irc_0 | irc_0 |
| 0624  | 0373  |
| 45    | 19    |
| hsa_c | hsa_c |
| irc_0 | irc_0 |
| 0624  | 0373  |
| 46    | 20    |
| hsa_c | hsa_c |
| irc_0 | irc_0 |
| 0624  | 0373  |
| 69    | 25    |
| hsa_c | hsa_c |
| irc_0 | irc_0 |
| 0624  | 0374  |
| 65    | 08    |
| hsa_c | hsa_c |
| irc_0 | irc_0 |
| 0624  | 0374  |
| 66    | 34    |
| hsa_c | hsa_c |
| irc_0 | irc_0 |
| 0624  | 0374  |
| 67    | 36    |
| hsa_c | hsa_c |
| irc_0 | irc_0 |
| 0625  | 0374  |
| 20    | 37    |
| hsa_c | hsa_c |
| irc_0 | irc_0 |
| 0625  | 0374  |
| 24    | 38    |
| hsa_c | hsa_c |
| irc_0 | irc_0 |
| 0625  | 0374  |
| 27    | 48    |
| hsa_c | hsa_c |
| irc_0 | irc_0 |
| 0625  | 0374  |
| 28    | 39    |
| hsa_c | hsa_c |

|       |       |
|-------|-------|
| irc_0 | irc_0 |
| 0625  | 0374  |
| 29    | 40    |
| hsa_c | hsa_c |
| irc_0 | irc_0 |
| 0625  | 0374  |
| 30    | 44    |
| hsa_c | hsa_c |
| irc_0 | irc_0 |
| 0625  | 0374  |
| 31    | 45    |
| hsa_c | hsa_c |
| irc_0 | irc_0 |
| 0625  | 0374  |
| 32    | 46    |
| hsa_c | hsa_c |
| irc_0 | irc_0 |
| 0625  | 0375  |
| 33    | 18    |
| hsa_c | hsa_c |
| irc_0 | irc_0 |
| 0625  | 0375  |
| 34    | 19    |
| hsa_c | hsa_c |
| irc_0 | irc_0 |
| 0625  | 0375  |
| 35    | 20    |
| hsa_c | hsa_c |
| irc_0 | irc_0 |
| 0625  | 0375  |
| 36    | 21    |
| hsa_c | hsa_c |
| irc_0 | irc_0 |
| 0625  | 0375  |
| 37    | 22    |
| hsa_c | hsa_c |
| irc_0 | irc_0 |
| 0625  | 0375  |
| 38    | 23    |
| hsa_c | hsa_c |
| irc_0 | irc_0 |
| 0625  | 0377  |
| 69    | 35    |
| hsa_c | hsa_c |
| irc_0 | irc_0 |
| 0625  | 0377  |
| 68    | 38    |
| hsa_c | hsa_c |
| irc_0 | irc_0 |
| 0625  | 0377  |
| 73    | 39    |
| hsa_c | hsa_c |
| irc_0 | irc_0 |
| 0625  | 0377  |
| 74    | 40    |

|       |       |
|-------|-------|
| hsa_c | hsa_c |
| irc_0 | irc_0 |
| 0626  | 0377  |
| 04    | 42    |
| hsa_c | hsa_c |
| irc_0 | irc_0 |
| 0627  | 0377  |
| 51    | 43    |
| hsa_c | hsa_c |
| irc_0 | irc_0 |
| 0627  | 0377  |
| 52    | 44    |
| hsa_c | hsa_c |
| irc_0 | irc_0 |
| 0627  | 0378  |
| 85    | 15    |
| hsa_c | hsa_c |
| irc_0 | irc_0 |
| 0627  | 0378  |
| 87    | 56    |
| hsa_c | hsa_c |
| irc_0 | irc_0 |
| 0627  | 0378  |
| 91    | 60    |
| hsa_c | hsa_c |
| irc_0 | irc_0 |
| 0627  | 0378  |
| 93    | 63    |
| hsa_c | hsa_c |
| irc_0 | irc_0 |
| 0627  | 0378  |
| 96    | 64    |
| hsa_c | hsa_c |
| irc_0 | irc_0 |
| 0627  | 0378  |
| 97    | 65    |
| hsa_c | hsa_c |
| irc_0 | irc_0 |
| 0627  | 0378  |
| 98    | 66    |
| hsa_c | hsa_c |
| irc_0 | irc_0 |
| 0627  | 0378  |
| 99    | 67    |
| hsa_c | hsa_c |
| irc_0 | irc_0 |
| 0628  | 0378  |
| 00    | 68    |
| hsa_c | hsa_c |
| irc_0 | irc_0 |
| 0628  | 0379  |
| 01    | 14    |
| hsa_c | hsa_c |
| irc_0 | irc_0 |
| 0628  | 0379  |

|       |       |
|-------|-------|
| 02    | 29    |
| hsa_c | hsa_c |
| irc_0 | irc_0 |
| 0628  | 0379  |
| 05    | 30    |
| hsa_c | hsa_c |
| irc_0 | irc_0 |
| 0628  | 0379  |
| 07    | 31    |
| hsa_c | hsa_c |
| irc_0 | irc_0 |
| 0628  | 0034  |
| 10    | 20    |
| hsa_c | hsa_c |
| irc_0 | irc_0 |
| 0628  | 0034  |
| 17    | 27    |
| hsa_c | hsa_c |
| irc_0 | irc_0 |
| 0628  | 0054  |
| 18    | 09    |
| hsa_c | hsa_c |
| irc_0 | irc_0 |
| 0628  | 0079  |
| 20    | 65    |
| hsa_c | hsa_c |
| irc_0 | irc_0 |
| 0628  | 0156  |
| 21    | 9     |
| hsa_c | hsa_c |
| irc_0 | irc_0 |
| 0628  | 0381  |
| 22    | 53    |
| hsa_c | hsa_c |
| irc_0 | irc_0 |
| 0628  | 0381  |
| 23    | 55    |
| hsa_c | hsa_c |
| irc_0 | irc_0 |
| 0628  | 0381  |
| 24    | 56    |
| hsa_c | hsa_c |
| irc_0 | irc_0 |
| 0629  | 0381  |
| 29    | 57    |
| hsa_c | hsa_c |
| irc_0 | irc_0 |
| 0629  | 0381  |
| 30    | 58    |
| hsa_c | hsa_c |
| irc_0 | irc_0 |
| 0629  | 0381  |
| 36    | 61    |
| hsa_c | hsa_c |

|       |       |
|-------|-------|
| irc_0 | irc_0 |
| 0629  | 0383  |
| 37    | 17    |
| hsa_c | hsa_c |
| irc_0 | irc_0 |
| 0629  | 0383  |
| 74    | 22    |
| hsa_c | hsa_c |
| irc_0 | irc_0 |
| 0629  | 0384  |
| 75    | 04    |
| hsa_c | hsa_c |
| irc_0 | irc_0 |
| 0629  | 0053  |
| 76    | 43    |
| hsa_c | hsa_c |
| irc_0 | irc_0 |
| 0088  | 0090  |
| 32    | 60    |
| hsa_c | hsa_c |
| irc_0 | irc_0 |
| 0629  | 0384  |
| 78    | 45    |
| hsa_c | hsa_c |
| irc_0 | irc_0 |
| 0629  | 0384  |
| 83    | 47    |
| hsa_c | hsa_c |
| irc_0 | irc_0 |
| 0629  | 0384  |
| 84    | 48    |
| hsa_c | hsa_c |
| irc_0 | irc_0 |
| 0629  | 0384  |
| 85    | 86    |
| hsa_c | hsa_c |
| irc_0 | irc_0 |
| 0629  | 0385  |
| 86    | 00    |
| hsa_c | hsa_c |
| irc_0 | irc_0 |
| 0128  | 0386  |
| 4     | 32    |
| hsa_c | hsa_c |
| irc_0 | irc_0 |
| 0629  | 0386  |
| 90    | 33    |
| hsa_c | hsa_c |
| irc_0 | irc_0 |
| 0629  | 0386  |
| 91    | 34    |
| hsa_c | hsa_c |
| irc_0 | irc_0 |
| 0629  | 0078  |
| 92    | 07    |

|       |       |
|-------|-------|
| hsa_c | hsa_c |
| irc_0 | irc_0 |
| 0629  | 0387  |
| 93    | 71    |
| hsa_c | hsa_c |
| irc_0 | irc_0 |
| 0629  | 0387  |
| 94    | 79    |
| hsa_c | hsa_c |
| irc_0 | irc_0 |
| 0630  | 0387  |
| 56    | 80    |
| hsa_c | hsa_c |
| irc_0 | irc_0 |
| 0630  | 0387  |
| 59    | 82    |
| hsa_c | hsa_c |
| irc_0 | irc_0 |
| 0630  | 0387  |
| 60    | 86    |
| hsa_c | hsa_c |
| irc_0 | irc_0 |
| 0632  | 0387  |
| 90    | 90    |
| hsa_c | hsa_c |
| irc_0 | irc_0 |
| 0632  | 0387  |
| 91    | 97    |
| hsa_c | hsa_c |
| irc_0 | irc_0 |
| 0632  | 0388  |
| 92    | 02    |
| hsa_c | hsa_c |
| irc_0 | irc_0 |
| 0632  | 0388  |
| 95    | 05    |
| hsa_c | hsa_c |
| irc_0 | irc_0 |
| 0632  | 0056  |
| 96    | 02    |
| hsa_c | hsa_c |
| irc_0 | irc_0 |
| 0632  | 0388  |
| 97    | 32    |
| hsa_c | hsa_c |
| irc_0 | irc_0 |
| 0632  | 0388  |
| 98    | 33    |
| hsa_c | hsa_c |
| irc_0 | irc_0 |
| 0632  | 0388  |
| 99    | 34    |
| hsa_c | hsa_c |
| irc_0 | irc_0 |
| 0633  | 0388  |

|       |       |
|-------|-------|
| 00    | 35    |
| hsa_c | hsa_c |
| irc_0 | irc_0 |
| 0633  | 0388  |
| 01    | 36    |
| hsa_c | hsa_c |
| irc_0 | irc_0 |
| 0633  | 0388  |
| 02    | 37    |
| hsa_c | hsa_c |
| irc_0 | irc_0 |
| 0633  | 0388  |
| 03    | 38    |
| hsa_c | hsa_c |
| irc_0 | irc_0 |
| 0633  | 0388  |
| 04    | 39    |
| hsa_c | hsa_c |
| irc_0 | irc_0 |
| 0633  | 0388  |
| 08    | 45    |
| hsa_c | hsa_c |
| irc_0 | irc_0 |
| 0633  | 0388  |
| 09    | 86    |
| hsa_c | hsa_c |
| irc_0 | irc_0 |
| 0633  | 0030  |
| 10    | 96    |
| hsa_c | hsa_c |
| irc_0 | irc_0 |
| 0633  | 0040  |
| 11    | 82    |
| hsa_c | hsa_c |
| irc_0 | irc_0 |
| 0633  | 0388  |
| 12    | 92    |
| hsa_c | hsa_c |
| irc_0 | irc_0 |
| 0633  | 0388  |
| 13    | 93    |
| hsa_c | hsa_c |
| irc_0 | irc_0 |
| 0633  | 0388  |
| 14    | 94    |
| hsa_c | hsa_c |
| irc_0 | irc_0 |
| 0633  | 0388  |
| 15    | 95    |
| hsa_c | hsa_c |
| irc_0 | irc_0 |
| 0633  | 0388  |
| 16    | 96    |
| hsa_c | hsa_c |

|       |       |
|-------|-------|
| irc_0 | irc_0 |
| 0633  | 0389  |
| 64    | 10    |
| hsa_c | hsa_c |
| irc_0 | irc_0 |
| 0633  | 0077  |
| 93    | 42    |
| hsa_c | hsa_c |
| irc_0 | irc_0 |
| 0633  | 0389  |
| 92    | 94    |
| hsa_c | hsa_c |
| irc_0 | irc_0 |
| 0633  | 0389  |
| 94    | 97    |
| hsa_c | hsa_c |
| irc_0 | irc_0 |
| 0634  | 0389  |
| 16    | 98    |
| hsa_c | hsa_c |
| irc_0 | irc_0 |
| 0636  | 0389  |
| 32    | 99    |
| hsa_c | hsa_c |
| irc_0 | irc_0 |
| 0636  | 0390  |
| 48    | 00    |
| hsa_c | hsa_c |
| irc_0 | irc_0 |
| 0636  | 0390  |
| 49    | 04    |
| hsa_c | hsa_c |
| irc_0 | irc_0 |
| 0636  | 0390  |
| 50    | 05    |
| hsa_c | hsa_c |
| irc_0 | irc_0 |
| 0636  | 0390  |
| 51    | 11    |
| hsa_c | hsa_c |
| irc_0 | irc_0 |
| 0022  | 0390  |
| 46    | 12    |
| hsa_c | hsa_c |
| irc_0 | irc_0 |
| 0898  | 0390  |
| 19    | 13    |
| hsa_c | hsa_c |
| irc_0 | irc_0 |
| 0898  | 0390  |
| 94    | 35    |
| hsa_c | hsa_c |
| irc_0 | irc_0 |
| 0898  | 0390  |
| 93    | 39    |



|       |       |
|-------|-------|
| hsa_c | hsa_c |
| irc_0 | irc_0 |
| 0899  | 0390  |
| 08    | 56    |
| hsa_c | hsa_c |
| irc_0 | irc_0 |
| 0900  | 0390  |
| 37    | 75    |
| hsa_c | hsa_c |
| irc_0 | irc_0 |
| 0901  | 0390  |
| 04    | 87    |
| hsa_c | hsa_c |
| irc_0 | irc_0 |
| 0901  | 0390  |
| 05    | 88    |
| hsa_c | hsa_c |
| irc_0 | irc_0 |
| 0901  | 0390  |
| 07    | 90    |
| hsa_c | hsa_c |
| irc_0 | irc_0 |
| 0901  | 0390  |
| 08    | 95    |
| hsa_c | hsa_c |
| irc_0 | irc_0 |
| 0901  | 0390  |
| 09    | 97    |
| hsa_c | hsa_c |
| irc_0 | irc_0 |
| 0901  | 0390  |
| 10    | 98    |
| hsa_c | hsa_c |
| irc_0 | irc_0 |
| 0901  | 0390  |
| 11    | 99    |
| hsa_c | hsa_c |
| irc_0 | irc_0 |
| 0901  | 0391  |
| 63    | 05    |
| hsa_c | hsa_c |
| irc_0 | irc_0 |
| 0901  | 0391  |
| 71    | 06    |
| hsa_c | hsa_c |
| irc_0 | irc_0 |
| 0902  | 0391  |
| 01    | 23    |
| hsa_c | hsa_c |
| irc_0 | irc_0 |
| 0902  | 0391  |
| 02    | 28    |
| hsa_c | hsa_c |
| irc_0 | irc_0 |
| 0902  | 0391  |

|       |       |
|-------|-------|
| 03    | 49    |
| hsa_c | hsa_c |
| irc_0 | irc_0 |
| 0902  | 0391  |
| 88    | 75    |
| hsa_c | hsa_c |
| irc_0 | irc_0 |
| 0902  | 0391  |
| 89    | 76    |
| hsa_c | hsa_c |
| irc_0 | irc_0 |
| 0902  | 0392  |
| 94    | 28    |
| hsa_c | hsa_c |
| irc_0 | irc_0 |
| 0903  | 0392  |
| 62    | 29    |
| hsa_c | hsa_c |
| irc_0 | irc_0 |
| 0903  | 0392  |
| 86    | 30    |
| hsa_c | hsa_c |
| irc_0 | irc_0 |
| 0903  | 0393  |
| 93    | 14    |
| hsa_c | hsa_c |
| irc_0 | irc_0 |
| 0903  | 0393  |
| 95    | 15    |
| hsa_c | hsa_c |
| irc_0 | irc_0 |
| 0903  | 0393  |
| 96    | 16    |
| hsa_c | hsa_c |
| irc_0 | irc_0 |
| 0903  | 0393  |
| 97    | 30    |
| hsa_c | hsa_c |
| irc_0 | irc_0 |
| 0903  | 0393  |
| 99    | 31    |
| hsa_c | hsa_c |
| irc_0 | irc_0 |
| 0904  | 0393  |
| 05    | 32    |
| hsa_c | hsa_c |
| irc_0 | irc_0 |
| 0904  | 0393  |
| 06    | 36    |
| hsa_c | hsa_c |
| irc_0 | irc_0 |
| 0904  | 0395  |
| 07    | 64    |
| hsa_c | hsa_c |

|       |       |
|-------|-------|
| irc_0 | irc_0 |
| 0904  | 0395  |
| 08    | 66    |
| hsa_c | hsa_c |
| irc_0 | irc_0 |
| 0904  | 0395  |
| 10    | 69    |
| hsa_c | hsa_c |
| irc_0 | irc_0 |
| 0904  | 0397  |
| 11    | 42    |
| hsa_c | hsa_c |
| irc_0 | irc_0 |
| 0904  | 0397  |
| 12    | 43    |
| hsa_c | hsa_c |
| irc_0 | irc_0 |
| 0904  | 0397  |
| 13    | 44    |
| hsa_c | hsa_c |
| irc_0 | irc_0 |
| 0904  | 0397  |
| 14    | 45    |
| hsa_c | hsa_c |
| irc_0 | irc_0 |
| 0904  | 0397  |
| 15    | 47    |
| hsa_c | hsa_c |
| irc_0 | irc_0 |
| 0904  | 0397  |
| 96    | 48    |
| hsa_c | hsa_c |
| irc_0 | irc_0 |
| 0905  | 0397  |
| 31    | 50    |
| hsa_c | hsa_c |
| irc_0 | irc_0 |
| 0905  | 0397  |
| 36    | 62    |
| hsa_c | hsa_c |
| irc_0 | irc_0 |
| 0905  | 0397  |
| 37    | 96    |
| hsa_c | hsa_c |
| irc_0 | irc_0 |
| 0905  | 0397  |
| 38    | 97    |
| hsa_c | hsa_c |
| irc_0 | irc_0 |
| 0905  | 0398  |
| 39    | 05    |
| hsa_c | hsa_c |
| irc_0 | irc_0 |
| 0905  | 0398  |
| 40    | 06    |

|       |       |
|-------|-------|
| hsa_c | hsa_c |
| irc_0 | irc_0 |
| 0905  | 0398  |
| 41    | 07    |
| hsa_c | hsa_c |
| irc_0 | irc_0 |
| 0905  | 0398  |
| 42    | 08    |
| hsa_c | hsa_c |
| irc_0 | irc_0 |
| 0905  | 0398  |
| 46    | 09    |
| hsa_c | hsa_c |
| irc_0 | irc_0 |
| 0905  | 0398  |
| 47    | 10    |
| hsa_c | hsa_c |
| irc_0 | irc_0 |
| 0905  | 0398  |
| 48    | 11    |
| hsa_c | hsa_c |
| irc_0 | irc_0 |
| 0905  | 0398  |
| 51    | 12    |
| hsa_c | hsa_c |
| irc_0 | irc_0 |
| 0905  | 0398  |
| 52    | 13    |
| hsa_c | hsa_c |
| irc_0 | irc_0 |
| 0905  | 0398  |
| 53    | 32    |
| hsa_c | hsa_c |
| irc_0 | irc_0 |
| 0905  | 0398  |
| 75    | 35    |
| hsa_c | hsa_c |
| irc_0 | irc_0 |
| 0906  | 0399  |
| 39    | 26    |
| hsa_c | hsa_c |
| irc_0 | irc_0 |
| 0908  | 0399  |
| 35    | 37    |
| hsa_c | hsa_c |
| irc_0 | irc_0 |
| 0908  | 0399  |
| 36    | 39    |
| hsa_c | hsa_c |
| irc_0 | irc_0 |
| 0908  | 0064  |
| 54    | 37    |
| hsa_c | hsa_c |
| irc_0 | irc_0 |
| 0908  | 0399  |

|       |       |
|-------|-------|
| 55    | 48    |
| hsa_c | hsa_c |
| irc_0 | irc_0 |
| 0910  | 0399  |
| 27    | 49    |
| hsa_c | hsa_c |
| irc_0 | irc_0 |
| 0910  | 0399  |
| 29    | 50    |
| hsa_c | hsa_c |
| irc_0 | irc_0 |
| 0910  | 0399  |
| 30    | 51    |
| hsa_c | hsa_c |
| irc_0 | irc_0 |
| 0911  | 0399  |
| 79    | 59    |
| hsa_c | hsa_c |
| irc_0 | irc_0 |
| 0911  | 0400  |
| 80    | 59    |
| hsa_c | hsa_c |
| irc_0 | irc_0 |
| 0912  | 0400  |
| 10    | 70    |
| hsa_c | hsa_c |
| irc_0 | irc_0 |
| 0913  | 0400  |
| 72    | 71    |
| hsa_c | hsa_c |
| irc_0 | irc_0 |
| 0913  | 0400  |
| 78    | 72    |
| hsa_c | hsa_c |
| irc_0 | irc_0 |
| 0913  | 0400  |
| 80    | 73    |
| hsa_c | hsa_c |
| irc_0 | irc_0 |
| 0913  | 0400  |
| 84    | 74    |
| hsa_c | hsa_c |
| irc_0 | irc_0 |
| 0913  | 0401  |
| 85    | 25    |
| hsa_c | hsa_c |
| irc_0 | irc_0 |
| 0913  | 0401  |
| 87    | 26    |
| hsa_c | hsa_c |
| irc_0 | irc_0 |
| 0052  | 0401  |
| 13    | 27    |
| hsa_c | hsa_c |

|       |       |
|-------|-------|
| irc_0 | irc_0 |
| 0067  | 0401  |
| 27    | 28    |
| hsa_c | hsa_c |
| irc_0 | irc_0 |
| 0914  | 0401  |
| 08    | 30    |
| hsa_c | hsa_c |
| irc_0 | irc_0 |
| 0914  | 0401  |
| 37    | 31    |
| hsa_c | hsa_c |
| irc_0 | irc_0 |
| 0914  | 0401  |
| 38    | 32    |
| hsa_c | hsa_c |
| irc_0 | irc_0 |
| 0915  | 0401  |
| 84    | 33    |
| hsa_c | hsa_c |
| irc_0 | irc_0 |
| 0915  | 0401  |
| 83    | 34    |
| hsa_c | hsa_c |
| irc_0 | irc_0 |
| 0917  | 0401  |
| 29    | 35    |
| hsa_c | hsa_c |
| irc_0 | irc_0 |
| 0917  | 0402  |
| 30    | 08    |
| hsa_c | hsa_c |
| irc_0 | irc_0 |
| 0917  | 0403  |
| 26    | 38    |
| hsa_c | hsa_c |
| irc_0 | irc_0 |
| 0917  | 0403  |
| 32    | 48    |
| hsa_c | hsa_c |
| irc_0 | irc_0 |
| 0917  | 0403  |
| 33    | 49    |
| hsa_c | hsa_c |
| irc_0 | irc_0 |
| 0917  | 0403  |
| 55    | 51    |
| hsa_c | hsa_c |
| irc_0 | irc_0 |
| 0917  | 0403  |
| 56    | 52    |
| hsa_c | hsa_c |
| irc_0 | irc_0 |
| 0918  | 0403  |
| 06    | 54    |

|       |       |
|-------|-------|
| hsa_c | hsa_c |
| irc_0 | irc_0 |
| 0918  | 0403  |
| 07    | 55    |
| hsa_c | hsa_c |
| irc_0 | irc_0 |
| 0918  | 0403  |
| 08    | 57    |
| hsa_c | hsa_c |
| irc_0 | irc_0 |
| 0918  | 0403  |
| 32    | 58    |
| hsa_c | hsa_c |
| irc_0 | irc_0 |
| 0918  | 0403  |
| 33    | 59    |
| hsa_c | hsa_c |
| irc_0 | irc_0 |
| 0918  | 0138  |
| 34    | 8     |
| hsa_c | hsa_c |
| irc_0 | irc_0 |
| 0918  | 0403  |
| 35    | 96    |
| hsa_c | hsa_c |
| irc_0 | irc_0 |
| 0918  | 0403  |
| 36    | 97    |
| hsa_c | hsa_c |
| irc_0 | irc_0 |
| 0918  | 0403  |
| 37    | 98    |
| hsa_c | hsa_c |
| irc_0 | irc_0 |
| 0918  | 0403  |
| 38    | 99    |
| hsa_c | hsa_c |
| irc_0 | irc_0 |
| 0918  | 0404  |
| 39    | 00    |
| hsa_c | hsa_c |
| irc_0 | irc_0 |
| 0918  | 0404  |
| 40    | 01    |
| hsa_c | hsa_c |
| irc_0 | irc_0 |
| 0918  | 0404  |
| 41    | 02    |
| hsa_c | hsa_c |
| irc_0 | irc_0 |
| 0918  | 0404  |
| 42    | 03    |
| hsa_c | hsa_c |
| irc_0 | irc_0 |
| 0918  | 0404  |

|       |       |
|-------|-------|
| 43    | 04    |
| hsa_c | hsa_c |
| irc_0 | irc_0 |
| 0918  | 0404  |
| 44    | 23    |
| hsa_c | hsa_c |
| irc_0 | irc_0 |
| 0918  | 0404  |
| 45    | 24    |
| hsa_c | hsa_c |
| irc_0 | irc_0 |
| 0918  | 0404  |
| 46    | 25    |
| hsa_c | hsa_c |
| irc_0 | irc_0 |
| 0918  | 0404  |
| 47    | 74    |
| hsa_c | hsa_c |
| irc_0 | irc_0 |
| 0918  | 0404  |
| 48    | 75    |
| hsa_c | hsa_c |
| irc_0 | irc_0 |
| 0918  | 0404  |
| 49    | 76    |
| hsa_c | hsa_c |
| irc_0 | irc_0 |
| 0918  | 0404  |
| 50    | 77    |
| hsa_c | hsa_c |
| irc_0 | irc_0 |
| 0918  | 0404  |
| 51    | 78    |
| hsa_c | hsa_c |
| irc_0 | irc_0 |
| 0918  | 0404  |
| 52    | 79    |
| hsa_c | hsa_c |
| irc_0 | irc_0 |
| 0918  | 0052  |
| 53    | 58    |
| hsa_c | hsa_c |
| irc_0 | irc_0 |
| 0918  | 0066  |
| 54    | 91    |
| hsa_c | hsa_c |
| irc_0 | irc_0 |
| 0918  | 0405  |
| 55    | 04    |
| hsa_c | hsa_c |
| irc_0 | irc_0 |
| 0918  | 0405  |
| 56    | 11    |
| hsa_c | hsa_c |



|       |       |
|-------|-------|
| irc_0 | irc_0 |
| 0918  | 0405  |
| 57    | 12    |
| hsa_c | hsa_c |
| irc_0 | irc_0 |
| 0918  | 0405  |
| 58    | 14    |
| hsa_c | hsa_c |
| irc_0 | irc_0 |
| 0918  | 0405  |
| 60    | 15    |
| hsa_c | hsa_c |
| irc_0 | irc_0 |
| 0918  | 0405  |
| 61    | 17    |
| hsa_c | hsa_c |
| irc_0 | irc_0 |
| 0918  | 0405  |
| 62    | 18    |
| hsa_c | hsa_c |
| irc_0 | irc_0 |
| 0918  | 0405  |
| 63    | 19    |
| hsa_c | hsa_c |
| irc_0 | irc_0 |
| 0918  | 0405  |
| 64    | 94    |
| hsa_c | hsa_c |
| irc_0 | irc_0 |
| 0918  | 0406  |
| 65    | 80    |
| hsa_c | hsa_c |
| irc_0 | irc_0 |
| 0918  | 0406  |
| 66    | 81    |
| hsa_c | hsa_c |
| irc_0 | irc_0 |
| 0918  | 0407  |
| 67    | 00    |
| hsa_c | hsa_c |
| irc_0 | irc_0 |
| 0918  | 0407  |
| 68    | 06    |
| hsa_c | hsa_c |
| irc_0 | irc_0 |
| 0918  | 0056  |
| 69    | 87    |
| hsa_c | hsa_c |
| irc_0 | irc_0 |
| 0918  | 0407  |
| 70    | 09    |
| hsa_c | hsa_c |
| irc_0 | irc_0 |
| 0918  | 0407  |
| 71    | 42    |

|       |       |
|-------|-------|
| hsa_c | hsa_c |
| irc_0 | irc_0 |
| 0918  | 0030  |
| 72    | 98    |
| hsa_c | hsa_c |
| irc_0 | irc_0 |
| 0918  | 0408  |
| 73    | 11    |
| hsa_c | hsa_c |
| irc_0 | irc_0 |
| 0918  | 0408  |
| 74    | 12    |
| hsa_c | hsa_c |
| irc_0 | irc_0 |
| 0918  | 0408  |
| 75    | 17    |
| hsa_c | hsa_c |
| irc_0 | irc_0 |
| 0918  | 0408  |
| 76    | 19    |
| hsa_c | hsa_c |
| irc_0 | irc_0 |
| 0921  | 0157  |
| 01    | 4     |
| hsa_c | hsa_c |
| irc_0 | irc_0 |
| 0921  | 0409  |
| 02    | 58    |
| hsa_c | hsa_c |
| irc_0 | irc_0 |
| 0921  | 0411  |
| 03    | 37    |
| hsa_c | hsa_c |
| irc_0 | irc_0 |
| 0921  | 0411  |
| 04    | 43    |
| hsa_c | hsa_c |
| irc_0 | irc_0 |
| 0921  | 0411  |
| 05    | 92    |
| hsa_c | hsa_c |
| irc_0 | irc_0 |
| 0921  | 0413  |
| 06    | 73    |
| hsa_c | hsa_c |
| irc_0 | irc_0 |
| 0921  | 0041  |
| 07    | 92    |
| hsa_c | hsa_c |
| irc_0 | irc_0 |
| 0921  | 0414  |
| 08    | 26    |
| hsa_c | hsa_c |
| irc_0 | irc_0 |
| 0921  | 0414  |

27  
hsa\_c  
irc\_0  
0414  
29  
hsa\_c  
irc\_0  
0414  
30  
hsa\_c  
irc\_0  
0414  
57  
hsa\_c  
irc\_0  
0414  
58  
hsa\_c  
irc\_0  
0414  
78  
hsa\_c  
irc\_0  
0028  
99  
hsa\_c  
irc\_0  
0414  
83  
hsa\_c  
irc\_0  
0414  
84  
hsa\_c  
irc\_0  
0415  
24  
hsa\_c  
irc\_0  
0416  
05  
hsa\_c  
irc\_0  
0416  
07  
hsa\_c  
irc\_0  
0416  
09  
hsa\_c  
irc\_0  
0416  
10  
hsa\_c

irc\_0  
0417  
34  
hsa\_c  
irc\_0  
0418  
41  
hsa\_c  
irc\_0  
0418  
42  
hsa\_c  
irc\_0  
0418  
48  
hsa\_c  
irc\_0  
0418  
49  
hsa\_c  
irc\_0  
0418  
50  
hsa\_c  
irc\_0  
0418  
51  
hsa\_c  
irc\_0  
0418  
64  
hsa\_c  
irc\_0  
0418  
76  
hsa\_c  
irc\_0  
0418  
81  
hsa\_c  
irc\_0  
0418  
87  
hsa\_c  
irc\_0  
0418  
88  
hsa\_c  
irc\_0  
0418  
91  
hsa\_c  
irc\_0  
0418  
90

hsa\_c  
irc\_0  
0419  
51  
hsa\_c  
irc\_0  
0419  
52  
hsa\_c  
irc\_0  
0419  
54  
hsa\_c  
irc\_0  
0419  
77  
hsa\_c  
irc\_0  
0419  
82  
hsa\_c  
irc\_0  
0419  
83  
hsa\_c  
irc\_0  
0420  
59  
hsa\_c  
irc\_0  
0420  
61  
hsa\_c  
irc\_0  
0420  
75  
hsa\_c  
irc\_0  
0420  
76  
hsa\_c  
irc\_0  
0420  
78  
hsa\_c  
irc\_0  
0420  
87  
hsa\_c  
irc\_0  
0420  
88  
hsa\_c  
irc\_0  
0045

32  
hsa\_c  
irc\_0  
0056  
03  
hsa\_c  
irc\_0  
0074  
56  
hsa\_c  
irc\_0  
0420  
92  
hsa\_c  
irc\_0  
0420  
93  
hsa\_c  
irc\_0  
0420  
94  
hsa\_c  
irc\_0  
0420  
96  
hsa\_c  
irc\_0  
0420  
97  
hsa\_c  
irc\_0  
0420  
99  
hsa\_c  
irc\_0  
0420  
98  
hsa\_c  
irc\_0  
0421  
18  
hsa\_c  
irc\_0  
0421  
30  
hsa\_c  
irc\_0  
0421  
31  
hsa\_c  
irc\_0  
0421  
76  
hsa\_c

irc\_0  
0421  
77  
hsa\_c  
irc\_0  
0421  
78  
hsa\_c  
irc\_0  
0421  
94  
hsa\_c  
irc\_0  
0421  
95  
hsa\_c  
irc\_0  
0421  
96  
hsa\_c  
irc\_0  
0421  
97  
hsa\_c  
irc\_0  
0422  
44  
hsa\_c  
irc\_0  
0422  
45  
hsa\_c  
irc\_0  
0423  
66  
hsa\_c  
irc\_0  
0425  
22  
hsa\_c  
irc\_0  
0425  
24  
hsa\_c  
irc\_0  
0425  
43  
hsa\_c  
irc\_0  
0425  
44  
hsa\_c  
irc\_0  
0425  
51

hsa\_c  
irc\_0  
0425  
52  
hsa\_c  
irc\_0  
0425  
53  
hsa\_c  
irc\_0  
0425  
54  
hsa\_c  
irc\_0  
0425  
55  
hsa\_c  
irc\_0  
0427  
03  
hsa\_c  
irc\_0  
0427  
48  
hsa\_c  
irc\_0  
0427  
71  
hsa\_c  
irc\_0  
0427  
74  
hsa\_c  
irc\_0  
0427  
78  
hsa\_c  
irc\_0  
0427  
80  
hsa\_c  
irc\_0  
0427  
81  
hsa\_c  
irc\_0  
0427  
82  
hsa\_c  
irc\_0  
0427  
91  
hsa\_c  
irc\_0  
0427



92  
hsa\_c  
irc\_0  
0427  
93  
hsa\_c  
irc\_0  
0427  
94  
hsa\_c  
irc\_0  
0427  
95  
hsa\_c  
irc\_0  
0034  
22  
hsa\_c  
irc\_0  
0071  
94  
hsa\_c  
irc\_0  
0046  
59  
hsa\_c  
irc\_0  
0428  
78  
hsa\_c  
irc\_0  
0428  
93  
hsa\_c  
irc\_0  
0428  
96  
hsa\_c  
irc\_0  
0428  
98  
hsa\_c  
irc\_0  
0429  
00  
hsa\_c  
irc\_0  
0429  
07  
hsa\_c  
irc\_0  
0429  
08  
hsa\_c

irc\_0  
0429  
12  
hsa\_c  
irc\_0  
0429  
10  
hsa\_c  
irc\_0  
0429  
11  
hsa\_c  
irc\_0  
0429  
36  
hsa\_c  
irc\_0  
0430  
91  
hsa\_c  
irc\_0  
0431  
44  
hsa\_c  
irc\_0  
0431  
45  
hsa\_c  
irc\_0  
0019  
60  
hsa\_c  
irc\_0  
0431  
54  
hsa\_c  
irc\_0  
0431  
55  
hsa\_c  
irc\_0  
0431  
60  
hsa\_c  
irc\_0  
0431  
61  
hsa\_c  
irc\_0  
0431  
62  
hsa\_c  
irc\_0  
0431  
66

hsa\_c  
irc\_0  
0431  
71  
hsa\_c  
irc\_0  
0431  
72  
hsa\_c  
irc\_0  
0431  
73  
hsa\_c  
irc\_0  
0432  
70  
hsa\_c  
irc\_0  
0433  
87  
hsa\_c  
irc\_0  
0433  
90  
hsa\_c  
irc\_0  
0434  
49  
hsa\_c  
irc\_0  
0434  
52  
hsa\_c  
irc\_0  
0434  
53  
hsa\_c  
irc\_0  
0079  
90  
hsa\_c  
irc\_0  
0434  
58  
hsa\_c  
irc\_0  
0436  
62  
hsa\_c  
irc\_0  
0436  
98  
hsa\_c  
irc\_0  
0437

06  
hsa\_c  
irc\_0  
0437  
15  
hsa\_c  
irc\_0  
0437  
16  
hsa\_c  
irc\_0  
0437  
19  
hsa\_c  
irc\_0  
0437  
26  
hsa\_c  
irc\_0  
0437  
32  
hsa\_c  
irc\_0  
0437  
33  
hsa\_c  
irc\_0  
0437  
39  
hsa\_c  
irc\_0  
0437  
35  
hsa\_c  
irc\_0  
0437  
40  
hsa\_c  
irc\_0  
0437  
66  
hsa\_c  
irc\_0  
0437  
67  
hsa\_c  
irc\_0  
0437  
71  
hsa\_c  
irc\_0  
0437  
72  
hsa\_c

irc\_0  
0438  
00  
hsa\_c  
irc\_0  
0438  
01  
hsa\_c  
irc\_0  
0438  
02  
hsa\_c  
irc\_0  
0438  
03  
hsa\_c  
irc\_0  
0067  
10  
hsa\_c  
irc\_0  
0438  
57  
hsa\_c  
irc\_0  
0438  
58  
hsa\_c  
irc\_0  
0438  
59  
hsa\_c  
irc\_0  
0438  
60  
hsa\_c  
irc\_0  
0438  
61  
hsa\_c  
irc\_0  
0185  
1  
hsa\_c  
irc\_0  
0091  
23  
hsa\_c  
irc\_0  
0438  
92  
hsa\_c  
irc\_0  
0438  
97

hsa\_c  
irc\_0  
0438  
98  
hsa\_c  
irc\_0  
0163  
1  
hsa\_c  
irc\_0  
0439  
02  
hsa\_c  
irc\_0  
0439  
03  
hsa\_c  
irc\_0  
0439  
06  
hsa\_c  
irc\_0  
0439  
07  
hsa\_c  
irc\_0  
0439  
08  
hsa\_c  
irc\_0  
0439  
09  
hsa\_c  
irc\_0  
0439  
77  
hsa\_c  
irc\_0  
0439  
78  
hsa\_c  
irc\_0  
0440  
03  
hsa\_c  
irc\_0  
0440  
04  
hsa\_c  
irc\_0  
0440  
05  
hsa\_c  
irc\_0  
0440

10  
hsa\_c  
irc\_0  
0036  
99  
hsa\_c  
irc\_0  
0073  
78  
hsa\_c  
irc\_0  
0440  
29  
hsa\_c  
irc\_0  
0440  
75  
hsa\_c  
irc\_0  
0440  
94  
hsa\_c  
irc\_0  
0441  
45  
hsa\_c  
irc\_0  
0441  
46  
hsa\_c  
irc\_0  
0441  
47  
hsa\_c  
irc\_0  
0441  
49  
hsa\_c  
irc\_0  
0441  
51  
hsa\_c  
irc\_0  
0441  
53  
hsa\_c  
irc\_0  
0441  
54  
hsa\_c  
irc\_0  
0441  
55  
hsa\_c

irc\_0  
0441  
56  
hsa\_c  
irc\_0  
0441  
57  
hsa\_c  
irc\_0  
0034  
34  
hsa\_c  
irc\_0  
0080  
67  
hsa\_c  
irc\_0  
0441  
75  
hsa\_c  
irc\_0  
0441  
76  
hsa\_c  
irc\_0  
0441  
77  
hsa\_c  
irc\_0  
0029  
60  
hsa\_c  
irc\_0  
0056  
39  
hsa\_c  
irc\_0  
0443  
31  
hsa\_c  
irc\_0  
0443  
56  
hsa\_c  
irc\_0  
0443  
62  
hsa\_c  
irc\_0  
0443  
98  
hsa\_c  
irc\_0  
0444  
01



hsa\_c  
irc\_0  
0444  
03  
hsa\_c  
irc\_0  
0444  
04  
hsa\_c  
irc\_0  
0444  
11  
hsa\_c  
irc\_0  
0445  
02  
hsa\_c  
irc\_0  
0445  
03  
hsa\_c  
irc\_0  
0445  
04  
hsa\_c  
irc\_0  
0445  
05  
hsa\_c  
irc\_0  
0445  
06  
hsa\_c  
irc\_0  
0445  
07  
hsa\_c  
irc\_0  
0445  
08  
hsa\_c  
irc\_0  
0445  
09  
hsa\_c  
irc\_0  
0445  
10  
hsa\_c  
irc\_0  
0445  
11  
hsa\_c  
irc\_0  
0445

71  
hsa\_c  
irc\_0  
0445  
73  
hsa\_c  
irc\_0  
0447  
10  
hsa\_c  
irc\_0  
0447  
12  
hsa\_c  
irc\_0  
0447  
14  
hsa\_c  
irc\_0  
0447  
23  
hsa\_c  
irc\_0  
0447  
68  
hsa\_c  
irc\_0  
0447  
69  
hsa\_c  
irc\_0  
0448  
28  
hsa\_c  
irc\_0  
0086  
25  
hsa\_c  
irc\_0  
0448  
99  
hsa\_c  
irc\_0  
0449  
00  
hsa\_c  
irc\_0  
0449  
01  
hsa\_c  
irc\_0  
0449  
02  
hsa\_c

irc\_0  
0449  
08  
hsa\_c  
irc\_0  
0450  
27  
hsa\_c  
irc\_0  
0450  
28  
hsa\_c  
irc\_0  
0450  
29  
hsa\_c  
irc\_0  
0450  
63  
hsa\_c  
irc\_0  
0450  
66  
hsa\_c  
irc\_0  
0450  
67  
hsa\_c  
irc\_0  
0450  
68  
hsa\_c  
irc\_0  
0450  
69  
hsa\_c  
irc\_0  
0450  
70  
hsa\_c  
irc\_0  
0450  
71  
hsa\_c  
irc\_0  
0450  
72  
hsa\_c  
irc\_0  
0450  
73  
hsa\_c  
irc\_0  
0450  
74

hsa\_c  
irc\_0  
0451  
55  
hsa\_c  
irc\_0  
0451  
59  
hsa\_c  
irc\_0  
0451  
62  
hsa\_c  
irc\_0  
0451  
63  
hsa\_c  
irc\_0  
0451  
64  
hsa\_c  
irc\_0  
0031  
56  
hsa\_c  
irc\_0  
0453  
35  
hsa\_c  
irc\_0  
0070  
81  
hsa\_c  
irc\_0  
0453  
92  
hsa\_c  
irc\_0  
0454  
33  
hsa\_c  
irc\_0  
0454  
34  
hsa\_c  
irc\_0  
0454  
35  
hsa\_c  
irc\_0  
0454  
36  
hsa\_c  
irc\_0  
0454

37  
hsa\_c  
irc\_0  
0454  
38  
hsa\_c  
irc\_0  
0454  
39  
hsa\_c  
irc\_0  
0454  
40  
hsa\_c  
irc\_0  
0454  
41  
hsa\_c  
irc\_0  
0454  
42  
hsa\_c  
irc\_0  
0173  
0  
hsa\_c  
irc\_0  
0454  
74  
hsa\_c  
irc\_0  
0454  
78  
hsa\_c  
irc\_0  
0454  
82  
hsa\_c  
irc\_0  
0454  
83  
hsa\_c  
irc\_0  
0454  
84  
hsa\_c  
irc\_0  
0454  
87  
hsa\_c  
irc\_0  
0454  
94  
hsa\_c

irc\_0  
0454  
96  
hsa\_c  
irc\_0  
0454  
97  
hsa\_c  
irc\_0  
0454  
98  
hsa\_c  
irc\_0  
0454  
99  
hsa\_c  
irc\_0  
0455  
00  
hsa\_c  
irc\_0  
0455  
01  
hsa\_c  
irc\_0  
0455  
02  
hsa\_c  
irc\_0  
0455  
03  
hsa\_c  
irc\_0  
0455  
04  
hsa\_c  
irc\_0  
0455  
37  
hsa\_c  
irc\_0  
0455  
38  
hsa\_c  
irc\_0  
0063  
1  
hsa\_c  
irc\_0  
0455  
58  
hsa\_c  
irc\_0  
0455  
61

hsa\_c  
irc\_0  
0455  
91  
hsa\_c  
irc\_0  
0455  
92  
hsa\_c  
irc\_0  
0456  
00  
hsa\_c  
irc\_0  
0456  
26  
hsa\_c  
irc\_0  
0456  
27  
hsa\_c  
irc\_0  
0457  
11  
hsa\_c  
irc\_0  
0457  
10  
hsa\_c  
irc\_0  
0457  
32  
hsa\_c  
irc\_0  
0457  
33  
hsa\_c  
irc\_0  
0457  
34  
hsa\_c  
irc\_0  
0457  
35  
hsa\_c  
irc\_0  
0457  
36  
hsa\_c  
irc\_0  
0021  
56  
hsa\_c  
irc\_0  
0021

57  
hsa\_c  
irc\_0  
0457  
45  
hsa\_c  
irc\_0  
0457  
47  
hsa\_c  
irc\_0  
0149  
0  
hsa\_c  
irc\_0  
0457  
95  
hsa\_c  
irc\_0  
0457  
96  
hsa\_c  
irc\_0  
0457  
97  
hsa\_c  
irc\_0  
0457  
98  
hsa\_c  
irc\_0  
0457  
99  
hsa\_c  
irc\_0  
0458  
00  
hsa\_c  
irc\_0  
0458  
01  
hsa\_c  
irc\_0  
0458  
02  
hsa\_c  
irc\_0  
0458  
03  
hsa\_c  
irc\_0  
0458  
04  
hsa\_c



irc\_0  
0458  
18  
hsa\_c  
irc\_0  
0458  
19  
hsa\_c  
irc\_0  
0458  
22  
hsa\_c  
irc\_0  
0458  
21  
hsa\_c  
irc\_0  
0458  
45  
hsa\_c  
irc\_0  
0458  
46  
hsa\_c  
irc\_0  
0458  
61  
hsa\_c  
irc\_0  
0458  
63  
hsa\_c  
irc\_0  
0458  
64  
hsa\_c  
irc\_0  
0458  
67  
hsa\_c  
irc\_0  
0088  
86  
hsa\_c  
irc\_0  
0458  
90  
hsa\_c  
irc\_0  
0458  
91  
hsa\_c  
irc\_0  
0458  
93

hsa\_c  
irc\_0  
0458  
94  
hsa\_c  
irc\_0  
0458  
98  
hsa\_c  
irc\_0  
0458  
99  
hsa\_c  
irc\_0  
0459  
01  
hsa\_c  
irc\_0  
0459  
02  
hsa\_c  
irc\_0  
0459  
03  
hsa\_c  
irc\_0  
0459  
18  
hsa\_c  
irc\_0  
0459  
19  
hsa\_c  
irc\_0  
0459  
51  
hsa\_c  
irc\_0  
0459  
52  
hsa\_c  
irc\_0  
0024  
0  
hsa\_c  
irc\_0  
0459  
55  
hsa\_c  
irc\_0  
0459  
56  
hsa\_c  
irc\_0  
0459

59  
hsa\_c  
irc\_0  
0030  
70  
hsa\_c  
irc\_0  
0460  
03  
hsa\_c  
irc\_0  
0460  
04  
hsa\_c  
irc\_0  
0460  
07  
hsa\_c  
irc\_0  
0460  
08  
hsa\_c  
irc\_0  
0460  
09  
hsa\_c  
irc\_0  
0460  
10  
hsa\_c  
irc\_0  
0460  
14  
hsa\_c  
irc\_0  
0460  
15  
hsa\_c  
irc\_0  
0460  
16  
hsa\_c  
irc\_0  
0461  
41  
hsa\_c  
irc\_0  
0461  
42  
hsa\_c  
irc\_0  
0461  
43  
hsa\_c

irc\_0  
0461  
48  
hsa\_c  
irc\_0  
0461  
49  
hsa\_c  
irc\_0  
0461  
50  
hsa\_c  
irc\_0  
0461  
51  
hsa\_c  
irc\_0  
0461  
52  
hsa\_c  
irc\_0  
0462  
40  
hsa\_c  
irc\_0  
0462  
74  
hsa\_c  
irc\_0  
0462  
75  
hsa\_c  
irc\_0  
0463  
79  
hsa\_c  
irc\_0  
0065  
16  
hsa\_c  
irc\_0  
0463  
89  
hsa\_c  
irc\_0  
0463  
90  
hsa\_c  
irc\_0  
0463  
92  
hsa\_c  
irc\_0  
0463  
93

hsa\_c  
irc\_0  
0463  
94  
hsa\_c  
irc\_0  
0463  
95  
hsa\_c  
irc\_0  
0468  
22  
hsa\_c  
irc\_0  
0468  
25  
hsa\_c  
irc\_0  
0468  
26  
hsa\_c  
irc\_0  
0468  
27  
hsa\_c  
irc\_0  
0468  
29  
hsa\_c  
irc\_0  
0468  
30  
hsa\_c  
irc\_0  
0082  
81  
hsa\_c  
irc\_0  
0469  
12  
hsa\_c  
irc\_0  
0469  
13  
hsa\_c  
irc\_0  
0469  
14  
hsa\_c  
irc\_0  
0470  
00  
hsa\_c  
irc\_0  
0470

01  
hsa\_c  
irc\_0  
0470  
02  
hsa\_c  
irc\_0  
0470  
03  
hsa\_c  
irc\_0  
0470  
04  
hsa\_c  
irc\_0  
0470  
05  
hsa\_c  
irc\_0  
0470  
06  
hsa\_c  
irc\_0  
0470  
07  
hsa\_c  
irc\_0  
0470  
11  
hsa\_c  
irc\_0  
0470  
12  
hsa\_c  
irc\_0  
0470  
41  
hsa\_c  
irc\_0  
0470  
45  
hsa\_c  
irc\_0  
0470  
46  
hsa\_c  
irc\_0  
0470  
48  
hsa\_c  
irc\_0  
0077  
49  
hsa\_c

irc\_0  
0471  
28  
hsa\_c  
irc\_0  
0471  
30  
hsa\_c  
irc\_0  
0471  
35  
hsa\_c  
irc\_0  
0471  
36  
hsa\_c  
irc\_0  
0471  
37  
hsa\_c  
irc\_0  
0163  
3  
hsa\_c  
irc\_0  
0471  
52  
hsa\_c  
irc\_0  
0471  
55  
hsa\_c  
irc\_0  
0471  
56  
hsa\_c  
irc\_0  
0034  
95  
hsa\_c  
irc\_0  
0040  
17  
hsa\_c  
irc\_0  
0473  
53  
hsa\_c  
irc\_0  
0473  
54  
hsa\_c  
irc\_0  
0473  
58

hsa\_c  
irc\_0  
0473  
60  
hsa\_c  
irc\_0  
0473  
61  
hsa\_c  
irc\_0  
0473  
63  
hsa\_c  
irc\_0  
0473  
84  
hsa\_c  
irc\_0  
0473  
85  
hsa\_c  
irc\_0  
0473  
87  
hsa\_c  
irc\_0  
0473  
88  
hsa\_c  
irc\_0  
0473  
91  
hsa\_c  
irc\_0  
0474  
59  
hsa\_c  
irc\_0  
0474  
61  
hsa\_c  
irc\_0  
0474  
81  
hsa\_c  
irc\_0  
0474  
82  
hsa\_c  
irc\_0  
0474  
83  
hsa\_c  
irc\_0  
0474



84  
hsa\_c  
irc\_0  
0474  
86  
hsa\_c  
irc\_0  
0474  
87  
hsa\_c  
irc\_0  
0474  
88  
hsa\_c  
irc\_0  
0474  
89  
hsa\_c  
irc\_0  
0474  
90  
hsa\_c  
irc\_0  
0474  
91  
hsa\_c  
irc\_0  
0475  
23  
hsa\_c  
irc\_0  
0475  
24  
hsa\_c  
irc\_0  
0475  
32  
hsa\_c  
irc\_0  
0475  
33  
hsa\_c  
irc\_0  
0475  
37  
hsa\_c  
irc\_0  
0475  
38  
hsa\_c  
irc\_0  
0475  
39  
hsa\_c

irc\_0  
0475  
40  
hsa\_c  
irc\_0  
0475  
41  
hsa\_c  
irc\_0  
0475  
42  
hsa\_c  
irc\_0  
0476  
03  
hsa\_c  
irc\_0  
0476  
66  
hsa\_c  
irc\_0  
0476  
67  
hsa\_c  
irc\_0  
0476  
81  
hsa\_c  
irc\_0  
0476  
83  
hsa\_c  
irc\_0  
0476  
89  
hsa\_c  
irc\_0  
0476  
90  
hsa\_c  
irc\_0  
0476  
91  
hsa\_c  
irc\_0  
0476  
92  
hsa\_c  
irc\_0  
0476  
93  
hsa\_c  
irc\_0  
0195  
3

hsa\_c  
irc\_0  
0478  
80  
hsa\_c  
irc\_0  
0478  
81  
hsa\_c  
irc\_0  
0478  
85  
hsa\_c  
irc\_0  
0478  
87  
hsa\_c  
irc\_0  
0478  
90  
hsa\_c  
irc\_0  
0479  
58  
hsa\_c  
irc\_0  
0479  
59  
hsa\_c  
irc\_0  
0480  
27  
hsa\_c  
irc\_0  
0480  
55  
hsa\_c  
irc\_0  
0480  
56  
hsa\_c  
irc\_0  
0480  
57  
hsa\_c  
irc\_0  
0481  
82  
hsa\_c  
irc\_0  
0481  
83  
hsa\_c  
irc\_0  
0481

84  
hsa\_c  
irc\_0  
0481  
85  
hsa\_c  
irc\_0  
0481  
86  
hsa\_c  
irc\_0  
0481  
87  
hsa\_c  
irc\_0  
0481  
88  
hsa\_c  
irc\_0  
0481  
89  
hsa\_c  
irc\_0  
0481  
91  
hsa\_c  
irc\_0  
0482  
11  
hsa\_c  
irc\_0  
0482  
83  
hsa\_c  
irc\_0  
0482  
84  
hsa\_c  
irc\_0  
0482  
85  
hsa\_c  
irc\_0  
0482  
86  
hsa\_c  
irc\_0  
0483  
16  
hsa\_c  
irc\_0  
0483  
54  
hsa\_c

irc\_0  
0483  
55  
hsa\_c  
irc\_0  
0483  
56  
hsa\_c  
irc\_0  
0483  
57  
hsa\_c  
irc\_0  
0483  
58  
hsa\_c  
irc\_0  
0483  
59  
hsa\_c  
irc\_0  
0483  
60  
hsa\_c  
irc\_0  
0483  
61  
hsa\_c  
irc\_0  
0483  
62  
hsa\_c  
irc\_0  
0483  
66  
hsa\_c  
irc\_0  
0484  
43  
hsa\_c  
irc\_0  
0484  
44  
hsa\_c  
irc\_0  
0484  
45  
hsa\_c  
irc\_0  
0484  
46  
hsa\_c  
irc\_0  
0484  
47

hsa\_c  
irc\_0  
0484  
61  
hsa\_c  
irc\_0  
0484  
63  
hsa\_c  
irc\_0  
0484  
75  
hsa\_c  
irc\_0  
0484  
78  
hsa\_c  
irc\_0  
0486  
34  
hsa\_c  
irc\_0  
0487  
17  
hsa\_c  
irc\_0  
0487  
16  
hsa\_c  
irc\_0  
0488  
50  
hsa\_c  
irc\_0  
0488  
51  
hsa\_c  
irc\_0  
0488  
54  
hsa\_c  
irc\_0  
0488  
55  
hsa\_c  
irc\_0  
0488  
56  
hsa\_c  
irc\_0  
0488  
57  
hsa\_c  
irc\_0  
0488

58  
hsa\_c  
irc\_0  
0488  
59  
hsa\_c  
irc\_0  
0488  
60  
hsa\_c  
irc\_0  
0488  
61  
hsa\_c  
irc\_0  
0488  
62  
hsa\_c  
irc\_0  
0488  
63  
hsa\_c  
irc\_0  
0489  
20  
hsa\_c  
irc\_0  
0489  
23  
hsa\_c  
irc\_0  
0489  
40  
hsa\_c  
irc\_0  
0489  
41  
hsa\_c  
irc\_0  
0489  
91  
hsa\_c  
irc\_0  
0490  
10  
hsa\_c  
irc\_0  
0490  
39  
hsa\_c  
irc\_0  
0490  
40  
hsa\_c

irc\_0  
0490  
41  
hsa\_c  
irc\_0  
0490  
42  
hsa\_c  
irc\_0  
0490  
43  
hsa\_c  
irc\_0  
0490  
44  
hsa\_c  
irc\_0  
0490  
45  
hsa\_c  
irc\_0  
0490  
46  
hsa\_c  
irc\_0  
0490  
79  
hsa\_c  
irc\_0  
0490  
80  
hsa\_c  
irc\_0  
0490  
81  
hsa\_c  
irc\_0  
0491  
00  
hsa\_c  
irc\_0  
0491  
58  
hsa\_c  
irc\_0  
0491  
59  
hsa\_c  
irc\_0  
0491  
78  
hsa\_c  
irc\_0  
0492  
34



hsa\_c  
irc\_0  
0492  
35  
hsa\_c  
irc\_0  
0492  
36  
hsa\_c  
irc\_0  
0492  
37  
hsa\_c  
irc\_0  
0492  
38  
hsa\_c  
irc\_0  
0492  
39  
hsa\_c  
irc\_0  
0492  
40  
hsa\_c  
irc\_0  
0492  
83  
hsa\_c  
irc\_0  
0493  
47  
hsa\_c  
irc\_0  
0493  
48  
hsa\_c  
irc\_0  
0493  
49  
hsa\_c  
irc\_0  
0493  
50  
hsa\_c  
irc\_0  
0493  
52  
hsa\_c  
irc\_0  
0493  
53  
hsa\_c  
irc\_0  
0493

54  
hsa\_c  
irc\_0  
0493  
55  
hsa\_c  
irc\_0  
0493  
56  
hsa\_c  
irc\_0  
0493  
65  
hsa\_c  
irc\_0  
0025  
79  
hsa\_c  
irc\_0  
0493  
87  
hsa\_c  
irc\_0  
0493  
89  
hsa\_c  
irc\_0  
0494  
01  
hsa\_c  
irc\_0  
0494  
02  
hsa\_c  
irc\_0  
0494  
03  
hsa\_c  
irc\_0  
0494  
04  
hsa\_c  
irc\_0  
0494  
05  
hsa\_c  
irc\_0  
0494  
99  
hsa\_c  
irc\_0  
0495  
02  
hsa\_c

irc\_0  
0495  
03  
hsa\_c  
irc\_0  
0495  
57  
hsa\_c  
irc\_0  
0495  
59  
hsa\_c  
irc\_0  
0495  
60  
hsa\_c  
irc\_0  
0495  
61  
hsa\_c  
irc\_0  
0495  
62  
hsa\_c  
irc\_0  
0495  
63  
hsa\_c  
irc\_0  
0495  
64  
hsa\_c  
irc\_0  
0495  
65  
hsa\_c  
irc\_0  
0495  
66  
hsa\_c  
irc\_0  
0495  
67  
hsa\_c  
irc\_0  
0495  
94  
hsa\_c  
irc\_0  
0495  
95  
hsa\_c  
irc\_0  
0495  
96

hsa\_c  
irc\_0  
0495  
97  
hsa\_c  
irc\_0  
0496  
65  
hsa\_c  
irc\_0  
0497  
16  
hsa\_c  
irc\_0  
0497  
53  
hsa\_c  
irc\_0  
0497  
54  
hsa\_c  
irc\_0  
0497  
55  
hsa\_c  
irc\_0  
0497  
56  
hsa\_c  
irc\_0  
0497  
57  
hsa\_c  
irc\_0  
0497  
58  
hsa\_c  
irc\_0  
0498  
75  
hsa\_c  
irc\_0  
0498  
77  
hsa\_c  
irc\_0  
0498  
78  
hsa\_c  
irc\_0  
0498  
79  
hsa\_c  
irc\_0  
0498

81  
hsa\_c  
irc\_0  
0498  
82  
hsa\_c  
irc\_0  
0498  
83  
hsa\_c  
irc\_0  
0062  
49  
hsa\_c  
irc\_0  
0071  
71  
hsa\_c  
irc\_0  
0499  
13  
hsa\_c  
irc\_0  
0499  
14  
hsa\_c  
irc\_0  
0499  
15  
hsa\_c  
irc\_0  
0499  
16  
hsa\_c  
irc\_0  
0499  
17  
hsa\_c  
irc\_0  
0499  
18  
hsa\_c  
irc\_0  
0499  
19  
hsa\_c  
irc\_0  
0499  
20  
hsa\_c  
irc\_0  
0499  
80  
hsa\_c

irc\_0  
0501  
12  
hsa\_c  
irc\_0  
0501  
13  
hsa\_c  
irc\_0  
0501  
14  
hsa\_c  
irc\_0  
0501  
15  
hsa\_c  
irc\_0  
0501  
69  
hsa\_c  
irc\_0  
0501  
72  
hsa\_c  
irc\_0  
0501  
73  
hsa\_c  
irc\_0  
0501  
96  
hsa\_c  
irc\_0  
0501  
97  
hsa\_c  
irc\_0  
0501  
98  
hsa\_c  
irc\_0  
0501  
99  
hsa\_c  
irc\_0  
0502  
33  
hsa\_c  
irc\_0  
0502  
48  
hsa\_c  
irc\_0  
0505  
67

hsa\_c  
irc\_0  
0505  
68  
hsa\_c  
irc\_0  
0505  
69  
hsa\_c  
irc\_0  
0505  
70  
hsa\_c  
irc\_0  
0505  
71  
hsa\_c  
irc\_0  
0506  
07  
hsa\_c  
irc\_0  
0506  
37  
hsa\_c  
irc\_0  
0506  
39  
hsa\_c  
irc\_0  
0506  
40  
hsa\_c  
irc\_0  
0506  
41  
hsa\_c  
irc\_0  
0506  
78  
hsa\_c  
irc\_0  
0506  
79  
hsa\_c  
irc\_0  
0506  
80  
hsa\_c  
irc\_0  
0506  
82  
hsa\_c  
irc\_0  
0506

85  
hsa\_c  
irc\_0  
0506  
86  
hsa\_c  
irc\_0  
0506  
87  
hsa\_c  
irc\_0  
0506  
88  
hsa\_c  
irc\_0  
0506  
89  
hsa\_c  
irc\_0  
0509  
32  
hsa\_c  
irc\_0  
0509  
53  
hsa\_c  
irc\_0  
0510  
33  
hsa\_c  
irc\_0  
0510  
34  
hsa\_c  
irc\_0  
0510  
35  
hsa\_c  
irc\_0  
0510  
36  
hsa\_c  
irc\_0  
0510  
37  
hsa\_c  
irc\_0  
0510  
38  
hsa\_c  
irc\_0  
0510  
41  
hsa\_c



irc\_0  
0510  
43  
hsa\_c  
irc\_0  
0510  
44  
hsa\_c  
irc\_0  
0510  
90  
hsa\_c  
irc\_0  
0510  
91  
hsa\_c  
irc\_0  
0510  
96  
hsa\_c  
irc\_0  
0510  
97  
hsa\_c  
irc\_0  
0511  
00  
hsa\_c  
irc\_0  
0511  
01  
hsa\_c  
irc\_0  
0511  
02  
hsa\_c  
irc\_0  
0511  
04  
hsa\_c  
irc\_0  
0511  
05  
hsa\_c  
irc\_0  
0511  
06  
hsa\_c  
irc\_0  
0511  
07  
hsa\_c  
irc\_0  
0511  
08

hsa\_c  
irc\_0  
0028  
1  
hsa\_c  
irc\_0  
0511  
31  
hsa\_c  
irc\_0  
0511  
35  
hsa\_c  
irc\_0  
0511  
36  
hsa\_c  
irc\_0  
0511  
37  
hsa\_c  
irc\_0  
0511  
38  
hsa\_c  
irc\_0  
0512  
65  
hsa\_c  
irc\_0  
0512  
66  
hsa\_c  
irc\_0  
0512  
67  
hsa\_c  
irc\_0  
0039  
71  
hsa\_c  
irc\_0  
0513  
27  
hsa\_c  
irc\_0  
0513  
42  
hsa\_c  
irc\_0  
0514  
14  
hsa\_c  
irc\_0  
0514

47  
hsa\_c  
irc\_0  
0514  
48  
hsa\_c  
irc\_0  
0514  
49  
hsa\_c  
irc\_0  
0514  
50  
hsa\_c  
irc\_0  
0514  
51  
hsa\_c  
irc\_0  
0514  
52  
hsa\_c  
irc\_0  
0514  
53  
hsa\_c  
irc\_0  
0514  
54  
hsa\_c  
irc\_0  
0514  
55  
hsa\_c  
irc\_0  
0514  
56  
hsa\_c  
irc\_0  
0514  
66  
hsa\_c  
irc\_0  
0514  
68  
hsa\_c  
irc\_0  
0514  
73  
hsa\_c  
irc\_0  
0514  
74  
hsa\_c

irc\_0  
0516  
65  
hsa\_c  
irc\_0  
0516  
66  
hsa\_c  
irc\_0  
0516  
71  
hsa\_c  
irc\_0  
0516  
72  
hsa\_c  
irc\_0  
0516  
73  
hsa\_c  
irc\_0  
0516  
74  
hsa\_c  
irc\_0  
0516  
75  
hsa\_c  
irc\_0  
0517  
14  
hsa\_c  
irc\_0  
0517  
15  
hsa\_c  
irc\_0  
0517  
16  
hsa\_c  
irc\_0  
0517  
17  
hsa\_c  
irc\_0  
0517  
18  
hsa\_c  
irc\_0  
0517  
19  
hsa\_c  
irc\_0  
0517  
20

hsa\_c  
irc\_0  
0517  
21  
hsa\_c  
irc\_0  
0517  
22  
hsa\_c  
irc\_0  
0517  
23  
hsa\_c  
irc\_0  
0517  
43  
hsa\_c  
irc\_0  
0517  
44  
hsa\_c  
irc\_0  
0517  
45  
hsa\_c  
irc\_0  
0517  
46  
hsa\_c  
irc\_0  
0517  
47  
hsa\_c  
irc\_0  
0518  
02  
hsa\_c  
irc\_0  
0518  
03  
hsa\_c  
irc\_0  
0518  
04  
hsa\_c  
irc\_0  
0519  
55  
hsa\_c  
irc\_0  
0519  
56  
hsa\_c  
irc\_0  
0520

03  
hsa\_c  
irc\_0  
0520  
05  
hsa\_c  
irc\_0  
0520  
06  
hsa\_c  
irc\_0  
0520  
07  
hsa\_c  
irc\_0  
0520  
28  
hsa\_c  
irc\_0  
0521  
15  
hsa\_c  
irc\_0  
0521  
29  
hsa\_c  
irc\_0  
0521  
36  
hsa\_c  
irc\_0  
0521  
61  
hsa\_c  
irc\_0  
0521  
62  
hsa\_c  
irc\_0  
0521  
67  
hsa\_c  
irc\_0  
0521  
68  
hsa\_c  
irc\_0  
0521  
69  
hsa\_c  
irc\_0  
0522  
01  
hsa\_c

irc\_0  
0522  
02  
hsa\_c  
irc\_0  
0522  
03  
hsa\_c  
irc\_0  
0522  
04  
hsa\_c  
irc\_0  
0522  
05  
hsa\_c  
irc\_0  
0522  
06  
hsa\_c  
irc\_0  
0522  
30  
hsa\_c  
irc\_0  
0522  
31  
hsa\_c  
irc\_0  
0522  
32  
hsa\_c  
irc\_0  
0522  
33  
hsa\_c  
irc\_0  
0522  
46  
hsa\_c  
irc\_0  
0522  
47  
hsa\_c  
irc\_0  
0522  
48  
hsa\_c  
irc\_0  
0522  
50  
hsa\_c  
irc\_0  
0522  
51

hsa\_c  
irc\_0  
0522  
52  
hsa\_c  
irc\_0  
0522  
53  
hsa\_c  
irc\_0  
0522  
54  
hsa\_c  
irc\_0  
0522  
55  
hsa\_c  
irc\_0  
0522  
56  
hsa\_c  
irc\_0  
0522  
57  
hsa\_c  
irc\_0  
0522  
58  
hsa\_c  
irc\_0  
0163  
4  
hsa\_c  
irc\_0  
0523  
00  
hsa\_c  
irc\_0  
0523  
07  
hsa\_c  
irc\_0  
0523  
09  
hsa\_c  
irc\_0  
0523  
29  
hsa\_c  
irc\_0  
0523  
33  
hsa\_c  
irc\_0  
0045



25  
hsa\_c  
irc\_0  
0591  
51  
hsa\_c  
irc\_0  
0592  
55  
hsa\_c  
irc\_0  
0592  
57  
hsa\_c  
irc\_0  
0593  
27  
hsa\_c  
irc\_0  
0593  
30  
hsa\_c  
irc\_0  
0594  
20  
hsa\_c  
irc\_0  
0594  
21  
hsa\_c  
irc\_0  
0594  
95  
hsa\_c  
irc\_0  
0091  
73  
hsa\_c  
irc\_0  
0021  
76  
hsa\_c  
irc\_0  
0595  
30  
hsa\_c  
irc\_0  
0595  
31  
hsa\_c  
irc\_0  
0595  
32  
hsa\_c

irc\_0  
0595  
49  
hsa\_c  
irc\_0  
0595  
63  
hsa\_c  
irc\_0  
0595  
80  
hsa\_c  
irc\_0  
0595  
81  
hsa\_c  
irc\_0  
0595  
82  
hsa\_c  
irc\_0  
0595  
87  
hsa\_c  
irc\_0  
0595  
88  
hsa\_c  
irc\_0  
0595  
92  
hsa\_c  
irc\_0  
0595  
93  
hsa\_c  
irc\_0  
0595  
96  
hsa\_c  
irc\_0  
0595  
97  
hsa\_c  
irc\_0  
0595  
98  
hsa\_c  
irc\_0  
0596  
14  
hsa\_c  
irc\_0  
0596  
86

hsa\_c  
irc\_0  
0596  
82  
hsa\_c  
irc\_0  
0596  
83  
hsa\_c  
irc\_0  
0596  
84  
hsa\_c  
irc\_0  
0596  
85  
hsa\_c  
irc\_0  
0596  
92  
hsa\_c  
irc\_0  
0596  
94  
hsa\_c  
irc\_0  
0070  
29  
hsa\_c  
irc\_0  
0597  
90  
hsa\_c  
irc\_0  
0597  
91  
hsa\_c  
irc\_0  
0598  
52  
hsa\_c  
irc\_0  
0598  
56  
hsa\_c  
irc\_0  
0598  
79  
hsa\_c  
irc\_0  
0599  
01  
hsa\_c  
irc\_0  
0599

02  
hsa\_c  
irc\_0  
0599  
03  
hsa\_c  
irc\_0  
0599  
04  
hsa\_c  
irc\_0  
0599  
05  
hsa\_c  
irc\_0  
0599  
27  
hsa\_c  
irc\_0  
0599  
31  
hsa\_c  
irc\_0  
0599  
32  
hsa\_c  
irc\_0  
0599  
39  
hsa\_c  
irc\_0  
0599  
41  
hsa\_c  
irc\_0  
0599  
42  
hsa\_c  
irc\_0  
0599  
44  
hsa\_c  
irc\_0  
0599  
45  
hsa\_c  
irc\_0  
0599  
46  
hsa\_c  
irc\_0  
0599  
47  
hsa\_c

irc\_0  
0176  
3  
hsa\_c  
irc\_0  
0599  
70  
hsa\_c  
irc\_0  
0599  
71  
hsa\_c  
irc\_0  
0599  
72  
hsa\_c  
irc\_0  
0599  
73  
hsa\_c  
irc\_0  
0599  
74  
hsa\_c  
irc\_0  
0599  
75  
hsa\_c  
irc\_0  
0188  
2  
hsa\_c  
irc\_0  
0600  
01  
hsa\_c  
irc\_0  
0600  
02  
hsa\_c  
irc\_0  
0601  
25  
hsa\_c  
irc\_0  
0601  
26  
hsa\_c  
irc\_0  
0601  
81  
hsa\_c  
irc\_0  
0602  
50

hsa\_c  
irc\_0  
0603  
05  
hsa\_c  
irc\_0  
0603  
07  
hsa\_c  
irc\_0  
0603  
09  
hsa\_c  
irc\_0  
0603  
10  
hsa\_c  
irc\_0  
0603  
11  
hsa\_c  
irc\_0  
0603  
12  
hsa\_c  
irc\_0  
0603  
13  
hsa\_c  
irc\_0  
0603  
19  
hsa\_c  
irc\_0  
0603  
20  
hsa\_c  
irc\_0  
0603  
21  
hsa\_c  
irc\_0  
0603  
22  
hsa\_c  
irc\_0  
0603  
36  
hsa\_c  
irc\_0  
0603  
45  
hsa\_c  
irc\_0  
0603

46  
hsa\_c  
irc\_0  
0603  
47  
hsa\_c  
irc\_0  
0603  
97  
hsa\_c  
irc\_0  
0604  
77  
hsa\_c  
irc\_0  
0604  
98  
hsa\_c  
irc\_0  
0604  
99  
hsa\_c  
irc\_0  
0605  
00  
hsa\_c  
irc\_0  
0605  
01  
hsa\_c  
irc\_0  
0605  
02  
hsa\_c  
irc\_0  
0605  
03  
hsa\_c  
irc\_0  
0605  
04  
hsa\_c  
irc\_0  
0605  
05  
hsa\_c  
irc\_0  
0605  
06  
hsa\_c  
irc\_0  
0605  
56  
hsa\_c

irc\_0  
0605  
76  
hsa\_c  
irc\_0  
0605  
77  
hsa\_c  
irc\_0  
0605  
88  
hsa\_c  
irc\_0  
0605  
89  
hsa\_c  
irc\_0  
0605  
90  
hsa\_c  
irc\_0  
0605  
91  
hsa\_c  
irc\_0  
0042  
12  
hsa\_c  
irc\_0  
0070  
26  
hsa\_c  
irc\_0  
0605  
98  
hsa\_c  
irc\_0  
0605  
99  
hsa\_c  
irc\_0  
0606  
03  
hsa\_c  
irc\_0  
0606  
04  
hsa\_c  
irc\_0  
0606  
07  
hsa\_c  
irc\_0  
0606  
08



hsa\_c  
irc\_0  
0606  
09  
hsa\_c  
irc\_0  
0606  
11  
hsa\_c  
irc\_0  
0090  
4  
hsa\_c  
irc\_0  
0606  
42  
hsa\_c  
irc\_0  
0606  
43  
hsa\_c  
irc\_0  
0608  
19  
hsa\_c  
irc\_0  
0608  
20  
hsa\_c  
irc\_0  
0608  
23  
hsa\_c  
irc\_0  
0608  
25  
hsa\_c  
irc\_0  
0608  
38  
hsa\_c  
irc\_0  
0609  
09  
hsa\_c  
irc\_0  
0609  
46  
hsa\_c  
irc\_0  
0609  
47  
hsa\_c  
irc\_0  
0609

48  
hsa\_c  
irc\_0  
0110  
7  
hsa\_c  
irc\_0  
0609  
80  
hsa\_c  
irc\_0  
0031  
28  
hsa\_c  
irc\_0  
0609  
88  
hsa\_c  
irc\_0  
0609  
89  
hsa\_c  
irc\_0  
0610  
80  
hsa\_c  
irc\_0  
0610  
83  
hsa\_c  
irc\_0  
0610  
87  
hsa\_c  
irc\_0  
0610  
88  
hsa\_c  
irc\_0  
0610  
90  
hsa\_c  
irc\_0  
0610  
91  
hsa\_c  
irc\_0  
0610  
92  
hsa\_c  
irc\_0  
0076  
09  
hsa\_c

irc\_0  
0611  
83  
hsa\_c  
irc\_0  
0611  
84  
hsa\_c  
irc\_0  
0611  
85  
hsa\_c  
irc\_0  
0038  
90  
hsa\_c  
irc\_0  
0613  
02  
hsa\_c  
irc\_0  
0061  
58  
hsa\_c  
irc\_0  
0613  
92  
hsa\_c  
irc\_0  
0613  
97  
hsa\_c  
irc\_0  
0615  
10  
hsa\_c  
irc\_0  
0043  
39  
hsa\_c  
irc\_0  
0615  
44  
hsa\_c  
irc\_0  
0615  
45  
hsa\_c  
irc\_0  
0615  
46  
hsa\_c  
irc\_0  
0615  
47

hsa\_c  
irc\_0  
0615  
48  
hsa\_c  
irc\_0  
0615  
49  
hsa\_c  
irc\_0  
0615  
50  
hsa\_c  
irc\_0  
0615  
95  
hsa\_c  
irc\_0  
0615  
96  
hsa\_c  
irc\_0  
0615  
98  
hsa\_c  
irc\_0  
0616  
00  
hsa\_c  
irc\_0  
0616  
01  
hsa\_c  
irc\_0  
0616  
02  
hsa\_c  
irc\_0  
0616  
03  
hsa\_c  
irc\_0  
0081  
60  
hsa\_c  
irc\_0  
0617  
13  
hsa\_c  
irc\_0  
0618  
80  
hsa\_c  
irc\_0  
0618

89  
hsa\_c  
irc\_0  
0185  
4  
hsa\_c  
irc\_0  
0619  
24  
hsa\_c  
irc\_0  
0619  
28  
hsa\_c  
irc\_0  
0619  
41  
hsa\_c  
irc\_0  
0619  
44  
hsa\_c  
irc\_0  
0619  
45  
hsa\_c  
irc\_0  
0619  
47  
hsa\_c  
irc\_0  
0619  
48  
hsa\_c  
irc\_0  
0620  
20  
hsa\_c  
irc\_0  
0620  
22  
hsa\_c  
irc\_0  
0620  
24  
hsa\_c  
irc\_0  
0620  
25  
hsa\_c  
irc\_0  
0620  
26  
hsa\_c

irc\_0  
0621  
83  
hsa\_c  
irc\_0  
0622  
37  
hsa\_c  
irc\_0  
0622  
38  
hsa\_c  
irc\_0  
0622  
39  
hsa\_c  
irc\_0  
0622  
40  
hsa\_c  
irc\_0  
0622  
41  
hsa\_c  
irc\_0  
0622  
59  
hsa\_c  
irc\_0  
0622  
60  
hsa\_c  
irc\_0  
0622  
82  
hsa\_c  
irc\_0  
0623  
34  
hsa\_c  
irc\_0  
0623  
35  
hsa\_c  
irc\_0  
0623  
39  
hsa\_c  
irc\_0  
0623  
41  
hsa\_c  
irc\_0  
0623  
46

hsa\_c  
irc\_0  
0623  
48  
hsa\_c  
irc\_0  
0623  
49  
hsa\_c  
irc\_0  
0623  
50  
hsa\_c  
irc\_0  
0623  
51  
hsa\_c  
irc\_0  
0623  
54  
hsa\_c  
irc\_0  
0624  
10  
hsa\_c  
irc\_0  
0624  
78  
hsa\_c  
irc\_0  
0624  
79  
hsa\_c  
irc\_0  
0042  
08  
hsa\_c  
irc\_0  
0082  
41  
hsa\_c  
irc\_0  
0625  
59  
hsa\_c  
irc\_0  
0625  
79  
hsa\_c  
irc\_0  
0625  
83  
hsa\_c  
irc\_0  
0625

85  
hsa\_c  
irc\_0  
0625  
89  
hsa\_c  
irc\_0  
0625  
90  
hsa\_c  
irc\_0  
0626  
92  
hsa\_c  
irc\_0  
0626  
93  
hsa\_c  
irc\_0  
0626  
94  
hsa\_c  
irc\_0  
0626  
95  
hsa\_c  
irc\_0  
0626  
96  
hsa\_c  
irc\_0  
0626  
97  
hsa\_c  
irc\_0  
0626  
98  
hsa\_c  
irc\_0  
0627  
70  
hsa\_c  
irc\_0  
0627  
72  
hsa\_c  
irc\_0  
0627  
73  
hsa\_c  
irc\_0  
0628  
18  
hsa\_c



irc\_0  
0628  
22  
hsa\_c  
irc\_0  
0628  
46  
hsa\_c  
irc\_0  
0629  
07  
hsa\_c  
irc\_0  
0083  
23  
hsa\_c  
irc\_0  
0629  
24  
hsa\_c  
irc\_0  
0629  
25  
hsa\_c  
irc\_0  
0629  
26  
hsa\_c  
irc\_0  
0629  
40  
hsa\_c  
irc\_0  
0629  
41  
hsa\_c  
irc\_0  
0629  
42  
hsa\_c  
irc\_0  
0629  
43  
hsa\_c  
irc\_0  
0629  
46  
hsa\_c  
irc\_0  
0630  
65  
hsa\_c  
irc\_0  
0631  
62

hsa\_c  
irc\_0  
0631  
63  
hsa\_c  
irc\_0  
0631  
80  
hsa\_c  
irc\_0  
0631  
81  
hsa\_c  
irc\_0  
0631  
82  
hsa\_c  
irc\_0  
0631  
83  
hsa\_c  
irc\_0  
0631  
93  
hsa\_c  
irc\_0  
0632  
38  
hsa\_c  
irc\_0  
0632  
99  
hsa\_c  
irc\_0  
0633  
02  
hsa\_c  
irc\_0  
0633  
47  
hsa\_c  
irc\_0  
0633  
86  
hsa\_c  
irc\_0  
0633  
87  
hsa\_c  
irc\_0  
0633  
88  
hsa\_c  
irc\_0  
0633

92  
hsa\_c  
irc\_0  
0633  
93  
hsa\_c  
irc\_0  
0634  
68  
hsa\_c  
irc\_0  
0634  
69  
hsa\_c  
irc\_0  
0634  
74  
hsa\_c  
irc\_0  
0634  
75  
hsa\_c  
irc\_0  
0085  
61  
hsa\_c  
irc\_0  
0164  
1  
hsa\_c  
irc\_0  
0213  
2  
hsa\_c  
irc\_0  
0636  
47  
hsa\_c  
irc\_0  
0217  
5  
hsa\_c  
irc\_0  
0636  
55  
hsa\_c  
irc\_0  
0636  
56  
hsa\_c  
irc\_0  
0636  
57  
hsa\_c

irc\_0  
0637  
19  
hsa\_c  
irc\_0  
0637  
28  
hsa\_c  
irc\_0  
0637  
35  
hsa\_c  
irc\_0  
0637  
39  
hsa\_c  
irc\_0  
0637  
41  
hsa\_c  
irc\_0  
0637  
42  
hsa\_c  
irc\_0  
0637  
78  
hsa\_c  
irc\_0  
0637  
98  
hsa\_c  
irc\_0  
0637  
99  
hsa\_c  
irc\_0  
0638  
00  
hsa\_c  
irc\_0  
0638  
01  
hsa\_c  
irc\_0  
0638  
02  
hsa\_c  
irc\_0  
0638  
03  
hsa\_c  
irc\_0  
0638  
82

hsa\_c  
irc\_0  
0638  
89  
hsa\_c  
irc\_0  
0638  
91  
hsa\_c  
irc\_0  
0639  
06  
hsa\_c  
irc\_0  
0639  
07  
hsa\_c  
irc\_0  
0639  
08  
hsa\_c  
irc\_0  
0639  
09  
hsa\_c  
irc\_0  
0639  
54  
hsa\_c  
irc\_0  
0639  
55  
hsa\_c  
irc\_0  
0639  
56  
hsa\_c  
irc\_0  
0639  
57  
hsa\_c  
irc\_0  
0639  
58  
hsa\_c  
irc\_0  
0639  
59  
hsa\_c  
irc\_0  
0639  
60  
hsa\_c  
irc\_0  
0639

61  
hsa\_c  
irc\_0  
0897  
72  
hsa\_c  
irc\_0  
0898  
44  
hsa\_c  
irc\_0  
0089  
43  
hsa\_c  
irc\_0  
0898  
67  
hsa\_c  
irc\_0  
0898  
69  
hsa\_c  
irc\_0  
0898  
70  
hsa\_c  
irc\_0  
0899  
34  
hsa\_c  
irc\_0  
0899  
35  
hsa\_c  
irc\_0  
0899  
36  
hsa\_c  
irc\_0  
0899  
37  
hsa\_c  
irc\_0  
0899  
38  
hsa\_c  
irc\_0  
0900  
39  
hsa\_c  
irc\_0  
0900  
48  
hsa\_c

irc\_0  
0900  
50  
hsa\_c  
irc\_0  
0900  
53  
hsa\_c  
irc\_0  
0900  
54  
hsa\_c  
irc\_0  
0901  
43  
hsa\_c  
irc\_0  
0901  
44  
hsa\_c  
irc\_0  
0901  
46  
hsa\_c  
irc\_0  
0901  
47  
hsa\_c  
irc\_0  
0901  
48  
hsa\_c  
irc\_0  
0901  
50  
hsa\_c  
irc\_0  
0901  
52  
hsa\_c  
irc\_0  
0901  
54  
hsa\_c  
irc\_0  
0901  
56  
hsa\_c  
irc\_0  
0901  
57  
hsa\_c  
irc\_0  
0901  
77

hsa\_c  
irc\_0  
0901  
84  
hsa\_c  
irc\_0  
0901  
85  
hsa\_c  
irc\_0  
0902  
01  
hsa\_c  
irc\_0  
0902  
03  
hsa\_c  
irc\_0  
0902  
04  
hsa\_c  
irc\_0  
0902  
05  
hsa\_c  
irc\_0  
0902  
06  
hsa\_c  
irc\_0  
0902  
27  
hsa\_c  
irc\_0  
0902  
35  
hsa\_c  
irc\_0  
0902  
43  
hsa\_c  
irc\_0  
0902  
47  
hsa\_c  
irc\_0  
0902  
48  
hsa\_c  
irc\_0  
0902  
51  
hsa\_c  
irc\_0  
0902



53  
hsa\_c  
irc\_0  
0902  
54  
hsa\_c  
irc\_0  
0902  
55  
hsa\_c  
irc\_0  
0902  
57  
hsa\_c  
irc\_0  
0902  
91  
hsa\_c  
irc\_0  
0902  
92  
hsa\_c  
irc\_0  
0902  
94  
hsa\_c  
irc\_0  
0077  
3  
hsa\_c  
irc\_0  
0903  
27  
hsa\_c  
irc\_0  
0903  
74  
hsa\_c  
irc\_0  
0903  
75  
hsa\_c  
irc\_0  
0903  
76  
hsa\_c  
irc\_0  
0903  
77  
hsa\_c  
irc\_0  
0903  
78  
hsa\_c

irc\_0  
0903  
79  
hsa\_c  
irc\_0  
0903  
80  
hsa\_c  
irc\_0  
0904  
26  
hsa\_c  
irc\_0  
0904  
27  
hsa\_c  
irc\_0  
0904  
30  
hsa\_c  
irc\_0  
0904  
31  
hsa\_c  
irc\_0  
0904  
32  
hsa\_c  
irc\_0  
0904  
62  
hsa\_c  
irc\_0  
0904  
63  
hsa\_c  
irc\_0  
0904  
64  
hsa\_c  
irc\_0  
0904  
65  
hsa\_c  
irc\_0  
0904  
66  
hsa\_c  
irc\_0  
0904  
67  
hsa\_c  
irc\_0  
0904  
68

hsa\_c  
irc\_0  
0904  
69  
hsa\_c  
irc\_0  
0904  
70  
hsa\_c  
irc\_0  
0904  
71  
hsa\_c  
irc\_0  
0904  
96  
hsa\_c  
irc\_0  
0905  
22  
hsa\_c  
irc\_0  
0905  
23  
hsa\_c  
irc\_0  
0905  
24  
hsa\_c  
irc\_0  
0905  
30  
hsa\_c  
irc\_0  
0906  
12  
hsa\_c  
irc\_0  
0906  
14  
hsa\_c  
irc\_0  
0906  
15  
hsa\_c  
irc\_0  
0906  
22  
hsa\_c  
irc\_0  
0906  
23  
hsa\_c  
irc\_0  
0906

24  
hsa\_c  
irc\_0  
0906  
25  
hsa\_c  
irc\_0  
0906  
26  
hsa\_c  
irc\_0  
0906  
55  
hsa\_c  
irc\_0  
0906  
57  
hsa\_c  
irc\_0  
0906  
62  
hsa\_c  
irc\_0  
0906  
66  
hsa\_c  
irc\_0  
0906  
71  
hsa\_c  
irc\_0  
0906  
72  
hsa\_c  
irc\_0  
0906  
73  
hsa\_c  
irc\_0  
0906  
78  
hsa\_c  
irc\_0  
0906  
79  
hsa\_c  
irc\_0  
0906  
85  
hsa\_c  
irc\_0  
0906  
86  
hsa\_c

irc\_0  
0906  
88  
hsa\_c  
irc\_0  
0906  
91  
hsa\_c  
irc\_0  
0906  
93  
hsa\_c  
irc\_0  
0906  
96  
hsa\_c  
irc\_0  
0906  
97  
hsa\_c  
irc\_0  
0906  
98  
hsa\_c  
irc\_0  
0906  
99  
hsa\_c  
irc\_0  
0907  
04  
hsa\_c  
irc\_0  
0907  
05  
hsa\_c  
irc\_0  
0907  
06  
hsa\_c  
irc\_0  
0907  
07  
hsa\_c  
irc\_0  
0907  
13  
hsa\_c  
irc\_0  
0907  
14  
hsa\_c  
irc\_0  
0907  
15

hsa\_c  
irc\_0  
0907  
16  
hsa\_c  
irc\_0  
0907  
17  
hsa\_c  
irc\_0  
0907  
19  
hsa\_c  
irc\_0  
0907  
22  
hsa\_c  
irc\_0  
0907  
23  
hsa\_c  
irc\_0  
0907  
24  
hsa\_c  
irc\_0  
0907  
25  
hsa\_c  
irc\_0  
0907  
30  
hsa\_c  
irc\_0  
0907  
35  
hsa\_c  
irc\_0  
0907  
36  
hsa\_c  
irc\_0  
0907  
37  
hsa\_c  
irc\_0  
0907  
41  
hsa\_c  
irc\_0  
0907  
42  
hsa\_c  
irc\_0  
0907

43  
hsa\_c  
irc\_0  
0907  
44  
hsa\_c  
irc\_0  
0907  
45  
hsa\_c  
irc\_0  
0907  
46  
hsa\_c  
irc\_0  
0907  
48  
hsa\_c  
irc\_0  
0907  
49  
hsa\_c  
irc\_0  
0907  
52  
hsa\_c  
irc\_0  
0908  
03  
hsa\_c  
irc\_0  
0908  
83  
hsa\_c  
irc\_0  
0908  
93  
hsa\_c  
irc\_0  
0908  
95  
hsa\_c  
irc\_0  
0908  
99  
hsa\_c  
irc\_0  
0909  
00  
hsa\_c  
irc\_0  
0909  
02  
hsa\_c

irc\_0  
0909  
03  
hsa\_c  
irc\_0  
0909  
04  
hsa\_c  
irc\_0  
0909  
28  
hsa\_c  
irc\_0  
0909  
30  
hsa\_c  
irc\_0  
0909  
31  
hsa\_c  
irc\_0  
0909  
32  
hsa\_c  
irc\_0  
0910  
27  
hsa\_c  
irc\_0  
0910  
70  
hsa\_c  
irc\_0  
0910  
73  
hsa\_c  
irc\_0  
0910  
81  
hsa\_c  
irc\_0  
0911  
06  
hsa\_c  
irc\_0  
0911  
07  
hsa\_c  
irc\_0  
0911  
08  
hsa\_c  
irc\_0  
0911  
09



hsa\_c  
irc\_0  
0911  
61  
hsa\_c  
irc\_0  
0911  
62  
hsa\_c  
irc\_0  
0911  
63  
hsa\_c  
irc\_0  
0911  
80  
hsa\_c  
irc\_0  
0912  
13  
hsa\_c  
irc\_0  
0913  
50  
hsa\_c  
irc\_0  
0913  
56  
hsa\_c  
irc\_0  
0913  
57  
hsa\_c  
irc\_0  
0913  
58  
hsa\_c  
irc\_0  
0914  
04  
hsa\_c  
irc\_0  
0914  
05  
hsa\_c  
irc\_0  
0914  
06  
hsa\_c  
irc\_0  
0914  
33  
hsa\_c  
irc\_0  
0914

96  
hsa\_c  
irc\_0  
0914  
98  
hsa\_c  
irc\_0  
0914  
99  
hsa\_c  
irc\_0  
0915  
00  
hsa\_c  
irc\_0  
0915  
01  
hsa\_c  
irc\_0  
0915  
03  
hsa\_c  
irc\_0  
0915  
05  
hsa\_c  
irc\_0  
0915  
11  
hsa\_c  
irc\_0  
0915  
12  
hsa\_c  
irc\_0  
0916  
77  
hsa\_c  
irc\_0  
0917  
36  
hsa\_c  
irc\_0  
0917  
37  
hsa\_c  
irc\_0  
0917  
38  
hsa\_c  
irc\_0  
0917  
51  
hsa\_c

irc\_0  
0917  
72  
hsa\_c  
irc\_0  
0917  
73  
hsa\_c  
irc\_0  
0918  
03  
hsa\_c  
irc\_0  
0918  
04  
hsa\_c  
irc\_0  
0918  
05  
hsa\_c  
irc\_0  
0918  
06  
hsa\_c  
irc\_0  
0918  
13  
hsa\_c  
irc\_0  
0918  
07  
hsa\_c  
irc\_0  
0918  
08  
hsa\_c  
irc\_0  
0918  
09  
hsa\_c  
irc\_0  
0918  
10  
hsa\_c  
irc\_0  
0918  
11  
hsa\_c  
irc\_0  
0918  
31  
hsa\_c  
irc\_0  
0918  
32

hsa\_c  
irc\_0  
0918  
33  
hsa\_c  
irc\_0  
0918  
34  
hsa\_c  
irc\_0  
0918  
35  
hsa\_c  
irc\_0  
0918  
36  
hsa\_c  
irc\_0  
0918  
37  
hsa\_c  
irc\_0  
0918  
38  
hsa\_c  
irc\_0  
0918  
39  
hsa\_c  
irc\_0  
0918  
40  
hsa\_c  
irc\_0  
0918  
41  
hsa\_c  
irc\_0  
0918  
42  
hsa\_c  
irc\_0  
0918  
43  
hsa\_c  
irc\_0  
0918  
44  
hsa\_c  
irc\_0  
0918  
45  
hsa\_c  
irc\_0  
0918

46  
hsa\_c  
irc\_0  
0918  
47  
hsa\_c  
irc\_0  
0918  
48  
hsa\_c  
irc\_0  
0918  
49  
hsa\_c  
irc\_0  
0918  
50  
hsa\_c  
irc\_0  
0918  
51  
hsa\_c  
irc\_0  
0918  
52  
hsa\_c  
irc\_0  
0918  
53  
hsa\_c  
irc\_0  
0918  
54  
hsa\_c  
irc\_0  
0918  
55  
hsa\_c  
irc\_0  
0918  
56  
hsa\_c  
irc\_0  
0918  
57  
hsa\_c  
irc\_0  
0918  
58  
hsa\_c  
irc\_0  
0918  
59  
hsa\_c

irc\_0  
0918  
60  
hsa\_c  
irc\_0  
0918  
61  
hsa\_c  
irc\_0  
0918  
62  
hsa\_c  
irc\_0  
0918  
63  
hsa\_c  
irc\_0  
0918  
64  
hsa\_c  
irc\_0  
0918  
65  
hsa\_c  
irc\_0  
0918  
66  
hsa\_c  
irc\_0  
0918  
67  
hsa\_c  
irc\_0  
0051  
3  
hsa\_c  
irc\_0  
0920  
76  
hsa\_c  
irc\_0  
0920  
79  
hsa\_c  
irc\_0  
0920  
80  
hsa\_c  
irc\_0  
0920  
82  
hsa\_c  
irc\_0  
0920  
83

hsa\_c  
irc\_0  
0920  
84  
hsa\_c  
irc\_0  
0920  
85  
hsa\_c  
irc\_0  
0920  
86  
hsa\_c  
irc\_0  
0920  
87  
hsa\_c  
irc\_0  
0920  
88  
hsa\_c  
irc\_0  
0920  
89  
hsa\_c  
irc\_0  
0921  
58  
hsa\_c  
irc\_0  
0921  
79  
hsa\_c  
irc\_0  
0078  
73  
hsa\_c  
irc\_0  
0922  
63
